# Supplementary material for: trim-21 promotes proteasomal degradation of CED-1 for apoptotic cell clearance in C. elegans
Source: eLife journal article supplement (doi:10.7554/elife.76436), 2022-08-05
Supplement: fig1-figsupp1-data1 [file Figure 1-figure supplement 1-Source Data 1.xlsx]

## Sheet: Figure 1-figure supplement 1A
		N2/Choloreuine
		0uM	5uM	25uM	50uM	75uM
CED-1/Actin	1st	1	3.05875	6.15849	3.69285	2.99142
CED-1/Actin	2nd	1	3.20611	6.15783	4.12864	3.12135
CED-1/Actin	3rd	1	2.92756	5.7573	3.81987	3.08452
	Mean	1	3.06414	6.02454	3.88045	3.06576
	SD		0.113779	0.188968	0.182993	0.0546768
	SEM		0.0656906	0.109101	0.105651	0.0315677
	P-Value		1.37089e-05	2.98685e-06	2.41084e-05	7.34462e-07

## Sheet: Figure 1-figure supplement 1B
			control	MG132	Chl	MG132+Chl
	CED-1/Actin	1st	1	2.77309	2.85147	3.5148
	CED-1/Actin	2nd	1	2.85671	2.62152	5.36114
	CED-1/Actin	3rd	1	2.73584	2.60694	4.12886
		Mean	1	2.78854	2.69331	4.33493
		SD		0.0505422	0.111993	0.767723
		SEM		0.0291806	0.0646594	0.443245
		P-Value		9.54014e-07	2.82884e-05	0.00356031
						0.0467524
						0.0402449
