# Supplementary material for: trim-21 promotes proteasomal degradation of CED-1 for apoptotic cell clearance in C. elegans
Source: eLife journal article supplement (doi:10.7554/elife.76436), 2022-08-05
Supplement: fig2-data1 [file Figure 2-source Data 1.xlsx]

## Sheet: Figure  2H
			ubiquitination level of CED-1						ubiquitination level of CED-1
			ced-1::flag; ha::ubq-2						ced-1::flag; ha::ubq-2
			WT	ubc-21	trim-21				WT	K48R	K63R
	UB/CED-1	1st	1	0.31596	0.287924		UB/CED-1	1st	1	0.27973	1.02267
	UB/CED-1	2nd	1	0.559235	0.490237		UB/CED-1	2nd	1	0.445264	1.09029
	UB/CED-1	3rd	1	0.381325	0.40298		UB/CED-1	3rd	1	0.273315	0.730991
		Mean	1	0.41884	0.393714			Mean	1	0.33277	0.947982
		SD		0.102798	0.0828532			SD		0.0795886	0.1559
		SEM		0.0593505	0.0478353			SEM		0.0459505	0.0900087
		P-Value		0.00132697	0.000492102			P-Value		0.000289781	0.661607

## Sheet: Figure  2I
				ubiquitination level of CED-1
				ced-1::flag; ha::ubq-2
				control RNAi	vps-37 RNAi
		UB/CED-1	1st	1	0.873715
		UB/CED-1	2nd	1	0.891985
		UB/CED-1	3rd	1	0.986091
			Mean	1	0.917264
			SD		0.0492367
			SEM		0.0284268
			P-Value		0.0762861
