# Supplementary material for: trim-21 promotes proteasomal degradation of CED-1 for apoptotic cell clearance in C. elegans
Source: eLife journal article supplement (doi:10.7554/elife.76436), 2022-08-05
Supplement: fig3-data1 [file Figure 3-source Data 1.xlsx]

## Sheet: Figure 3B
		N2	Pced-1trim-21	ced-6	ced-6; Pced-1trim-21
CED-1/Actin	1st	1	0.282495	2.09278	1.41505
CED-1/Actin	2nd	1	0.210639	1.86321	1.49505
CED-1/Actin	3rd	1	0.313825	1.67273	1.83071
	Mean	1	0.268986	1.87624	1.58027
	SD		0.0431947	0.171735	0.180074
	SEM		0.0249385	0.0991514	0.103966
	P-Value		1.80748e-05	0.00195604	0.0103611

## Sheet: Figure 3G
		The colocacalization of CED-1 and TRIM-21 fluorescence (%)
		CED-1::GFP; TRIM-21::mCherry
		N2	ced-6
	1st	71.65	49.68
	2nd	74.49	64.89
	3rd	70.53	52.94
	Mean	72.2233	55.8367
	SD		6.53855
	SEM		3.77504
	P-Value		0.0264283

## Sheet: Figure 3H
		Pced-1ced-1::flag
		WT	N962A
CED-1/Actin	1st	1	2.21019
CED-1/Actin	2nd	1	2.22969
CED-1/Actin	3rd	1	2.05608
	Mean	1	2.16532
	SD		0.0776548
	SEM		0.044834
	P-Value		2.91459e-05

## Sheet: Figure 3J
							ubiquitination level of CED-1
		Phsp-16trim-21::flag						ced-1::flag; ha::ubq-2
		WT	ced-6					WT	ced-6
TRIM-21/CED-1	1st	1	0.712547			UB/CED-1	1st	1	0.648029
TRIM-21/CED-1	2nd	1	0.460918			UB/CED-1	2nd	1	0.474475
TRIM-21/CED-1	3rd	1	0.355809			UB/CED-1	3rd	1	0.591981
	Mean	1	0.509758				Mean	1	0.571495
	SD		0.149676				SD		0.0723187
	SEM		0.0864155				SEM		0.0417532
	P-Value		0.00979215				P-Value		0.00110949
