# Supplementary material for: trim-21 promotes proteasomal degradation of CED-1 for apoptotic cell clearance in C. elegans
Source: eLife journal article supplement (doi:10.7554/elife.76436), 2022-08-05
Supplement: fig3-figsupp1-data1 [file Figure 3-figure supplement 1-Source Data 1.xlsx]

## Sheet: Figure 3-figure supplement 1G
			The recruitment of TRIM-21 to apoptotic cells surface (%)
			TRIM-21::GFP
			N2	ced-6
		1st	53.68	24.04
		2nd	48.96	22.83
		3rd	46.09	29.73
		Mean	49.5767	25.5333
		SD		3.00833
		SEM		1.73686
		P-Value		0.00143408
