# Supplementary material for: trim-21 promotes proteasomal degradation of CED-1 for apoptotic cell clearance in C. elegans
Source: eLife journal article supplement (doi:10.7554/elife.76436), 2022-08-05
Supplement: fig4-data1 [file Figure 4-source Data 1.xlsx]

## Sheet: Figure 4E
		N2	src-1(xwh26)
CED-1/Actin	1st	1	1.68442
CED-1/Actin	2nd	1	2.94256
CED-1/Actin	3rd	1	1.86894
	Mean	1	2.16531
	SD		0.554742
	SEM		0.32028
	P-Value		0.0411143

## Sheet: Figure 4G
No. of germ cell corpses(Time post L4)
N2/control RNAi																Mean	SD	SEM	P-Value
12h	0	0	0	0	0	0	0	0	0	0	1	0	0	0	0	0.0666667	0.249444	0.0644061
24h	0	1	0	0	1	0	0	1	0	0	1	0	0	0	2	0.4	0.61101	0.157762
36h	2	4	3	2	1	3	2	1	5	2	3	4	1	3	3	2.6	1.1431	0.295146
48h	4	7	2	6	8	3	2	1	1	5	3	1	4	4	3	3.6	2.09125	0.539959
60h	6	1	5	6	10	4	3	3	6	3	1	5	2	7	3	4.33333	2.35702	0.608581
N2/src-1 RNAi
12h	1	1	0	0	0	0	0	0	1	0	0	0	0	0	0	0.2	0.4	0.10328	0.298964
24h	4	2	2	1	1	0	0	0	0	1	0	0	0	2	1	0.933333	1.12349	0.290083	0.129903
36h	6	3	2	7	6	7	5	4	1	1	1	13	13	5	1	5	3.79473	0.979796	0.0313842
48h	6	8	18	6	9	7	5	3	18	6	28	19	6	17	14	11.3333	6.94422	1.79299	0.0004318
60h	15	15	17	22	40	27	18	24	22	4	17	13	4	18	10	17.7333	8.69074	2.24394	5.88786e-06
ced-1(e1735)/control RNAi
12h	0	0	0	0	0	2	0	1	0	0	0	0	0	0	0	0.2	0.541603	0.139841
24h	0	0	0	1	1	3	3	1	0	0	3	2	1	2	0	1.13333	1.14698	0.296148
36h	22	16	18	12	9	13	13	18	4	10	15	20	12	14	10	13.7333	4.49395	1.16033
48h	26	38	50	19	36	33	26	38	33	31	40	28	30	44	37	33.9333	7.5407	1.947
60h	27	19	30	45	60	48	44	45	50	40	73	57	40	65	38	45.4	13.9274	3.59605
ced-1(e1735)/src-1 RNAi
12h	0	1	0	0	0	0	0	0	0	0	0	0	0	0	0	0.0666667	0.249444	0.0644061	0.409868
24h	2	0	1	0	3	2	1	3	2	0	0	0	2	0	1	1.13333	1.0873	0.28074	1
36h	24	36	27	60	18	13	36	36	21	28	17	16	14	13	15	24.9333	12.439	3.21174	0.00368697
48h	43	52	35	47	34	28	39	31	31	32	60	37	43	39	40	39.4	8.35703	2.15778	0.0799099
60h	59	80	50	50	70	72	95	60	32	50	55	67	60	54	65	61.2667	14.2944	3.69079	0.00597964
ced-2(n1994)/control RNAi
12h	0	0	3	1	4	4	0	3	3	1	1	3	1	2	1	1.8	1.37598	0.355278
24h	8	1	15	8	7	16	4	4	2	4	5	8	11	3	1	6.46667	4.49988	1.16186
36h	13	8	8	8	18	16	9	5	14	15	1	10	12	17	5	10.6	4.77214	1.23216
48h	20	45	12	35	32	31	26	10	20	5	10	43	8	10	20	21.8	12.5549	3.24167
60h	40	40	55	22	31	32	65	8	50	35	60	40	30	44	65	41.1333	15.4698	3.99429
ced-2(n1994)/src-1 RNAi
12h	0	0	0	0	0	0	0	1	0	2	3	3	2	1	0	0.8	1.10755	0.285968	0.0431575
24h	9	10	18	9	9	6	27	17	25	19	17	32	20	16	9	16.2	7.39549	1.90951	0.000240725
36h	33	25	42	10	28	33	41	27	7	18	25	8	10	18	20	23	10.9909	2.83784	0.000591452
48h	52	70	50	64	45	40	46	60	32	50	75	49	60	25	16	48.9333	15.6097	4.0304	2.30267e-05
60h	80	35	55	53	86	40	30	55	50	45	80	42	50	50	50	53.4	15.9072	4.10723	0.0479427

## Sheet: Figure 4H
No. of somatic cell corpses(Developmental Stages)
N2/control RNAi																Mean	SD	SEM	P-Value
comma	12	10	9	11	8	11	12	8	10	9	11	12	10	8	7	9.86667	1.58605	0.409516
1.5F	13	10	16	12	13	14	15	11	9	13	13	11	11	11	13	12.3333	1.81353	0.468251
N2/src-1 RNAi
comma	14	10	12	11	14	11	9	11	14	11	13	13	13	17	11	12.2667	1.94822	0.503028	0.00129789
1.5F	16	16	11	12	17	22	21	13	22	15	17	26	17	18	19	17.4667	3.93051	1.01485	0.000128924
ced-1(e1735)/control RNAi
comma	19	19	20	21	20	25	24	22	20	22	24	23	21	22	20	21.4667	1.82087	0.470146
1.5F	31	25	26	24	28	29	21	24	29	28	28	27	26	31	30	27.1333	2.72927	0.704693
ced-1(e1735)/src-1 RNAi
comma	15	26	28	28	33	32	37	34	32	30	28	28	34	30	26	29.4	4.93694	1.27471	4.82719e-06
1.5F	28	33	40	30	28	33	44	28	31	30	36	33	41	41	44	34.6667	5.67646	1.46566	0.00011624
ced-2(n1994)/control RNAi
comma	26	27	27	28	28	27	28	32	25	38	32	30	26	34	28	29.0667	3.415	0.881749
1.5F	41	32	39	34	35	39	35	34	36	40	39	37	39	35	29	36.2667	3.19305	0.824441
ced-2(n1994)/src-1 RNAi
comma	22	40	36	41	36	44	39	36	34	25	38	28	27	27	28	33.4	6.46838	1.67013	0.0349408
1.5F	35	44	50	33	45	43	45	48	46	38	48	40	39	48	39	42.7333	4.97281	1.28398	0.000326163
