# Supplementary material for: trim-21 promotes proteasomal degradation of CED-1 for apoptotic cell clearance in C. elegans
Source: eLife journal article supplement (doi:10.7554/elife.76436), 2022-08-05

Figure 4-figure supplement 1B


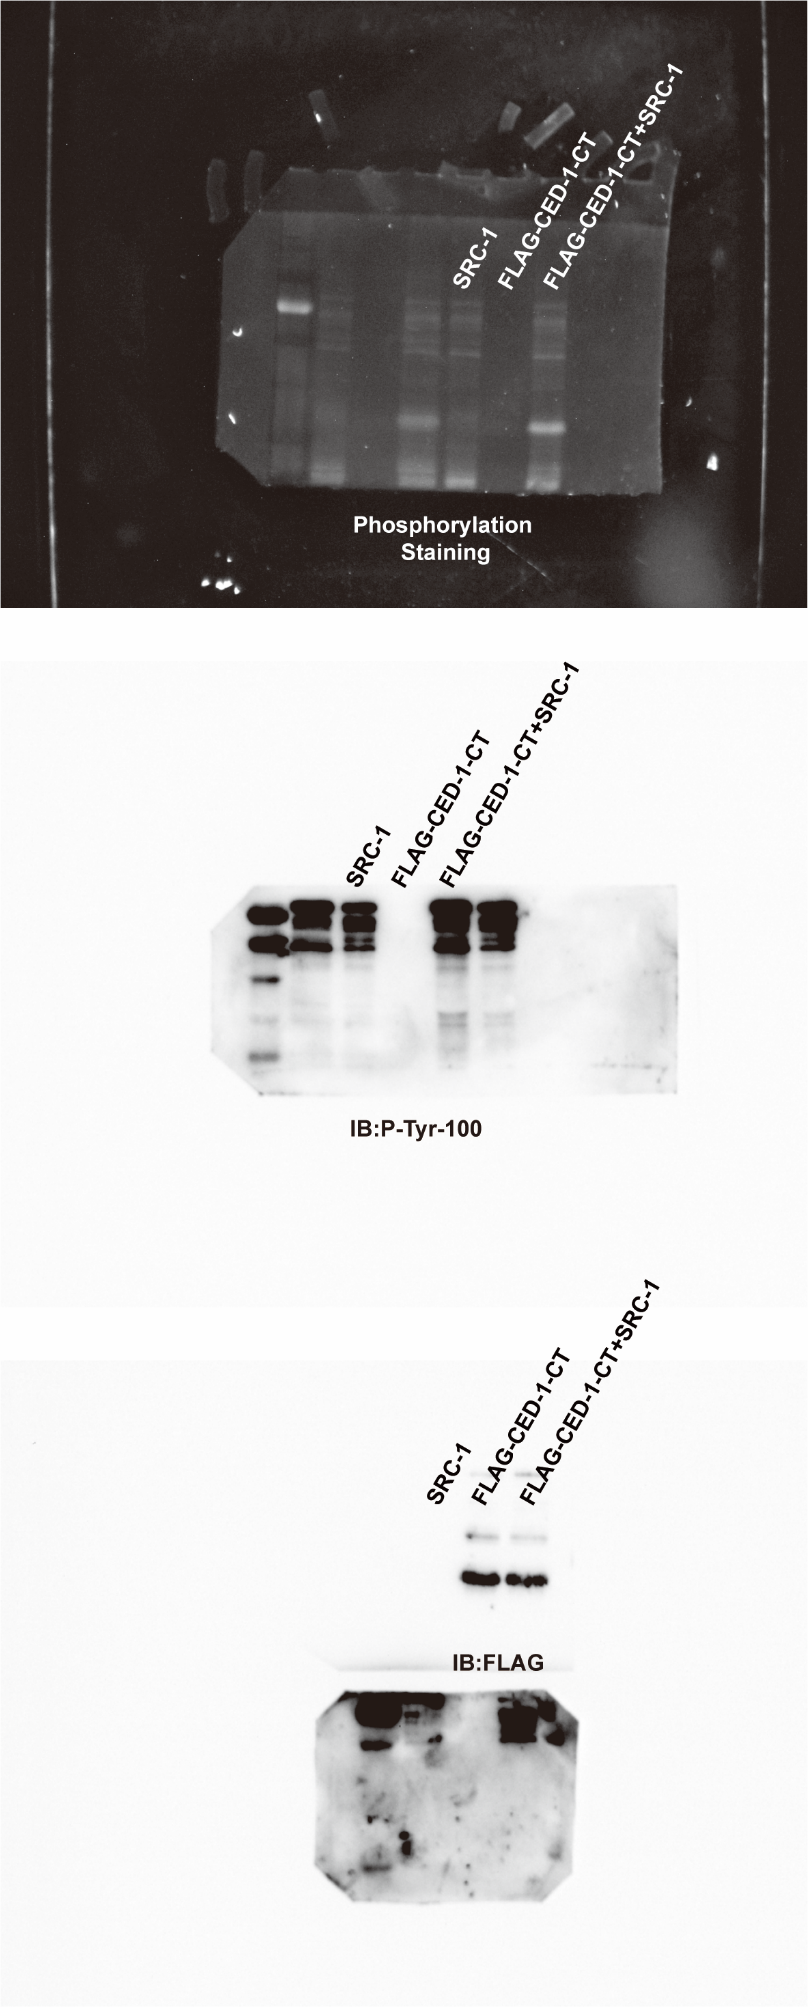


Figure 4-figure supplement 1D


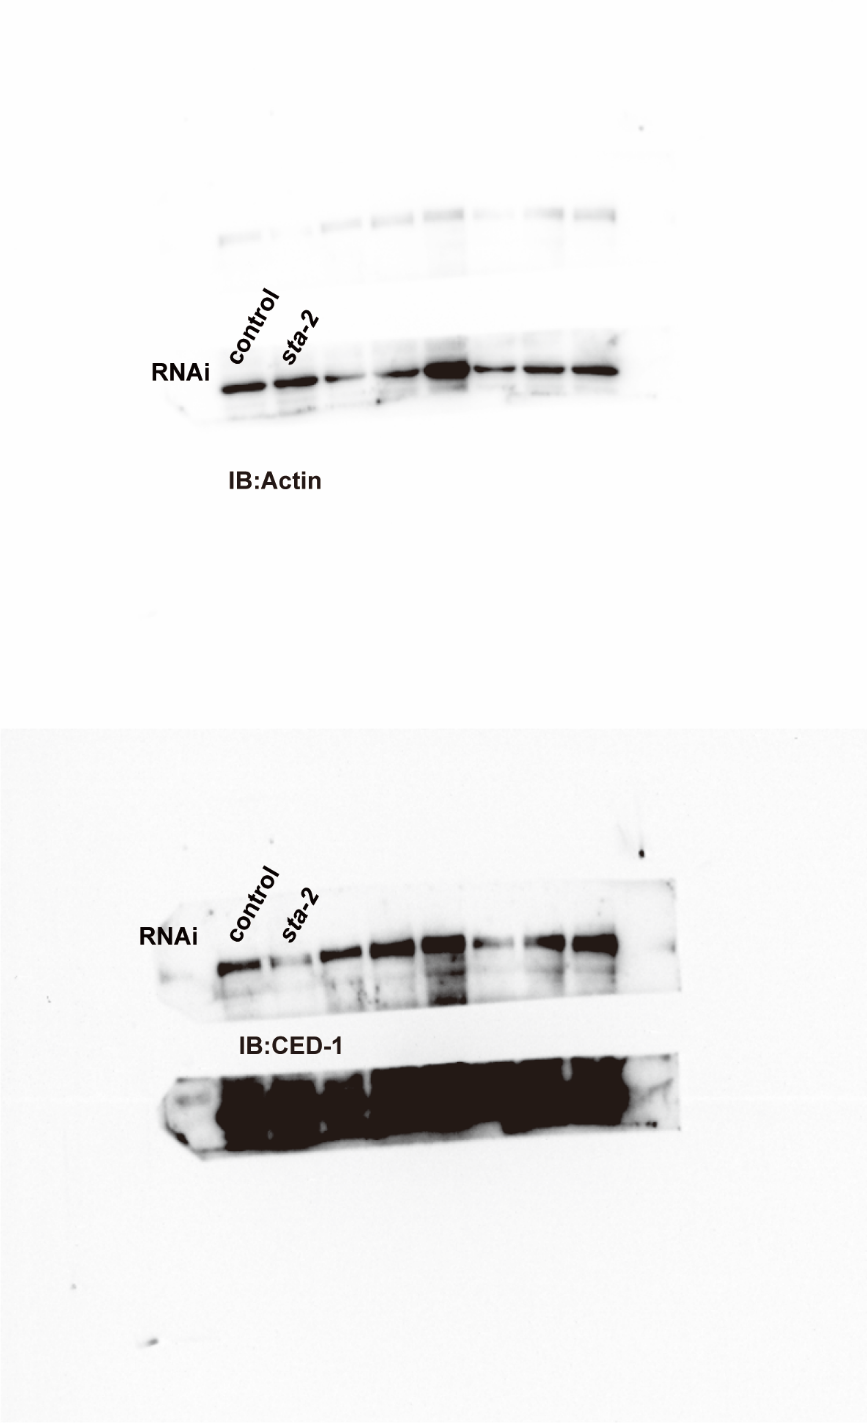


Figure 4-figure supplement 1I


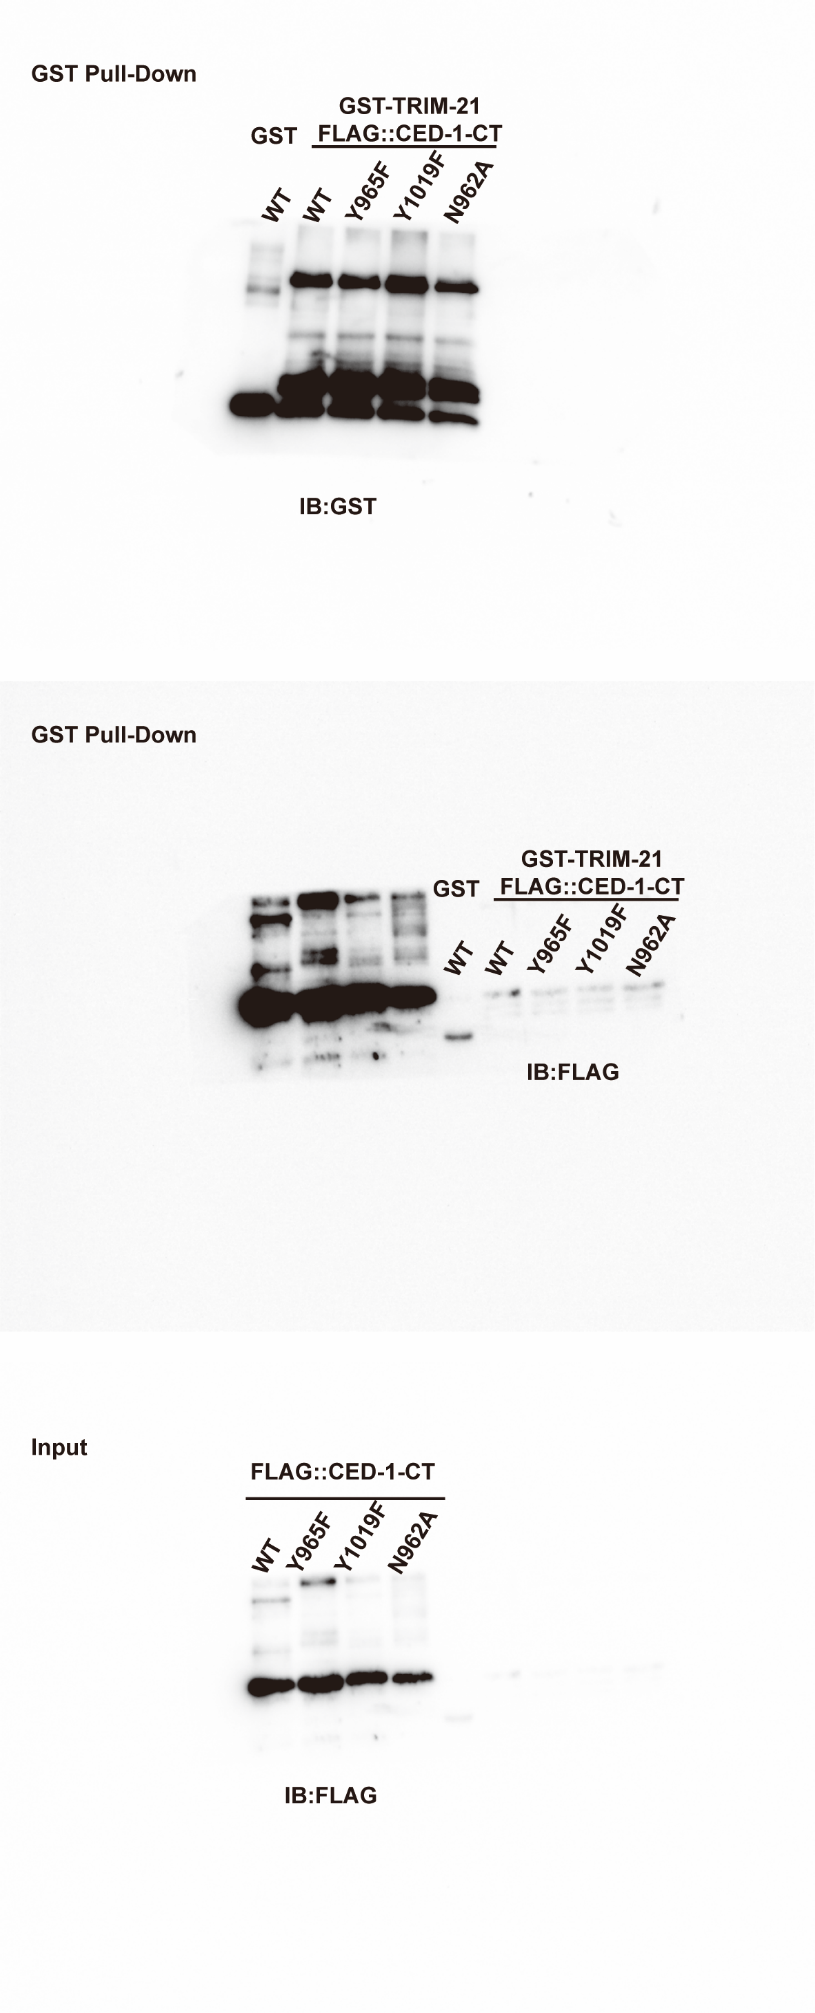


Figure 4-figure supplement 1J


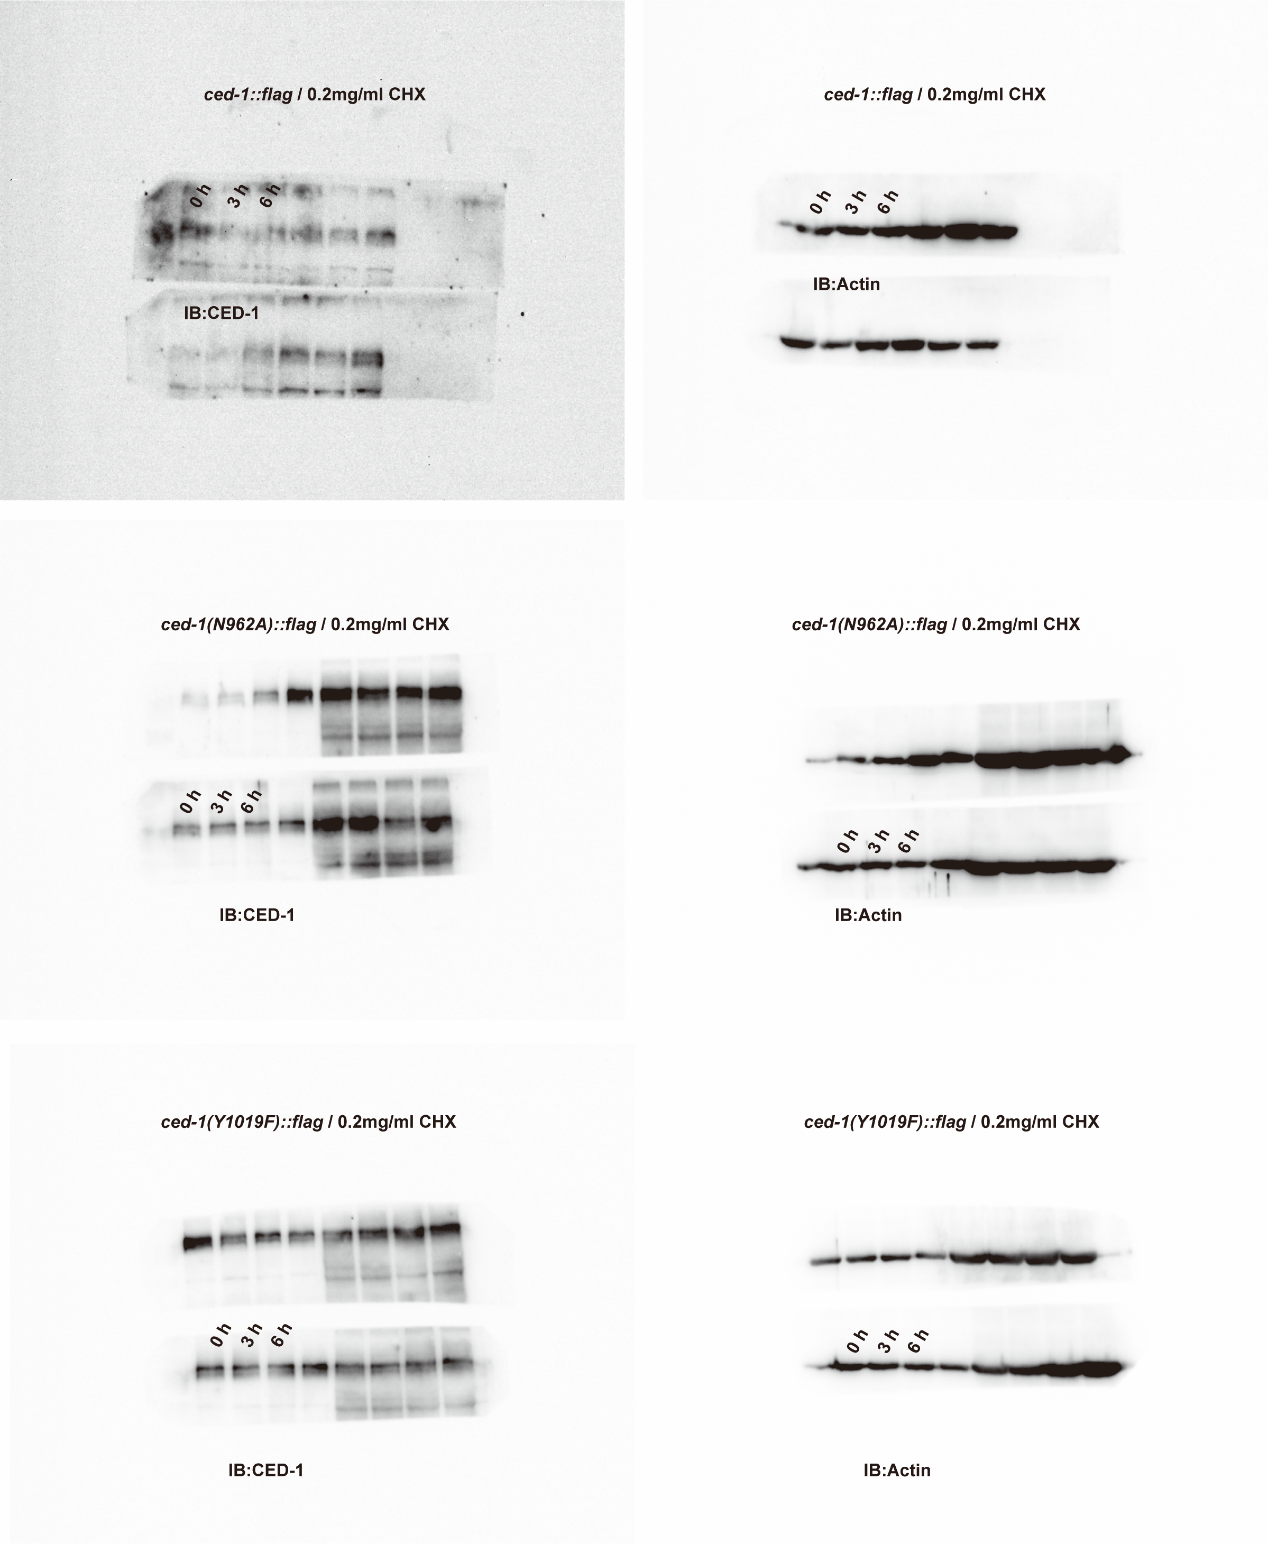


Figure 4-figure supplement 1L


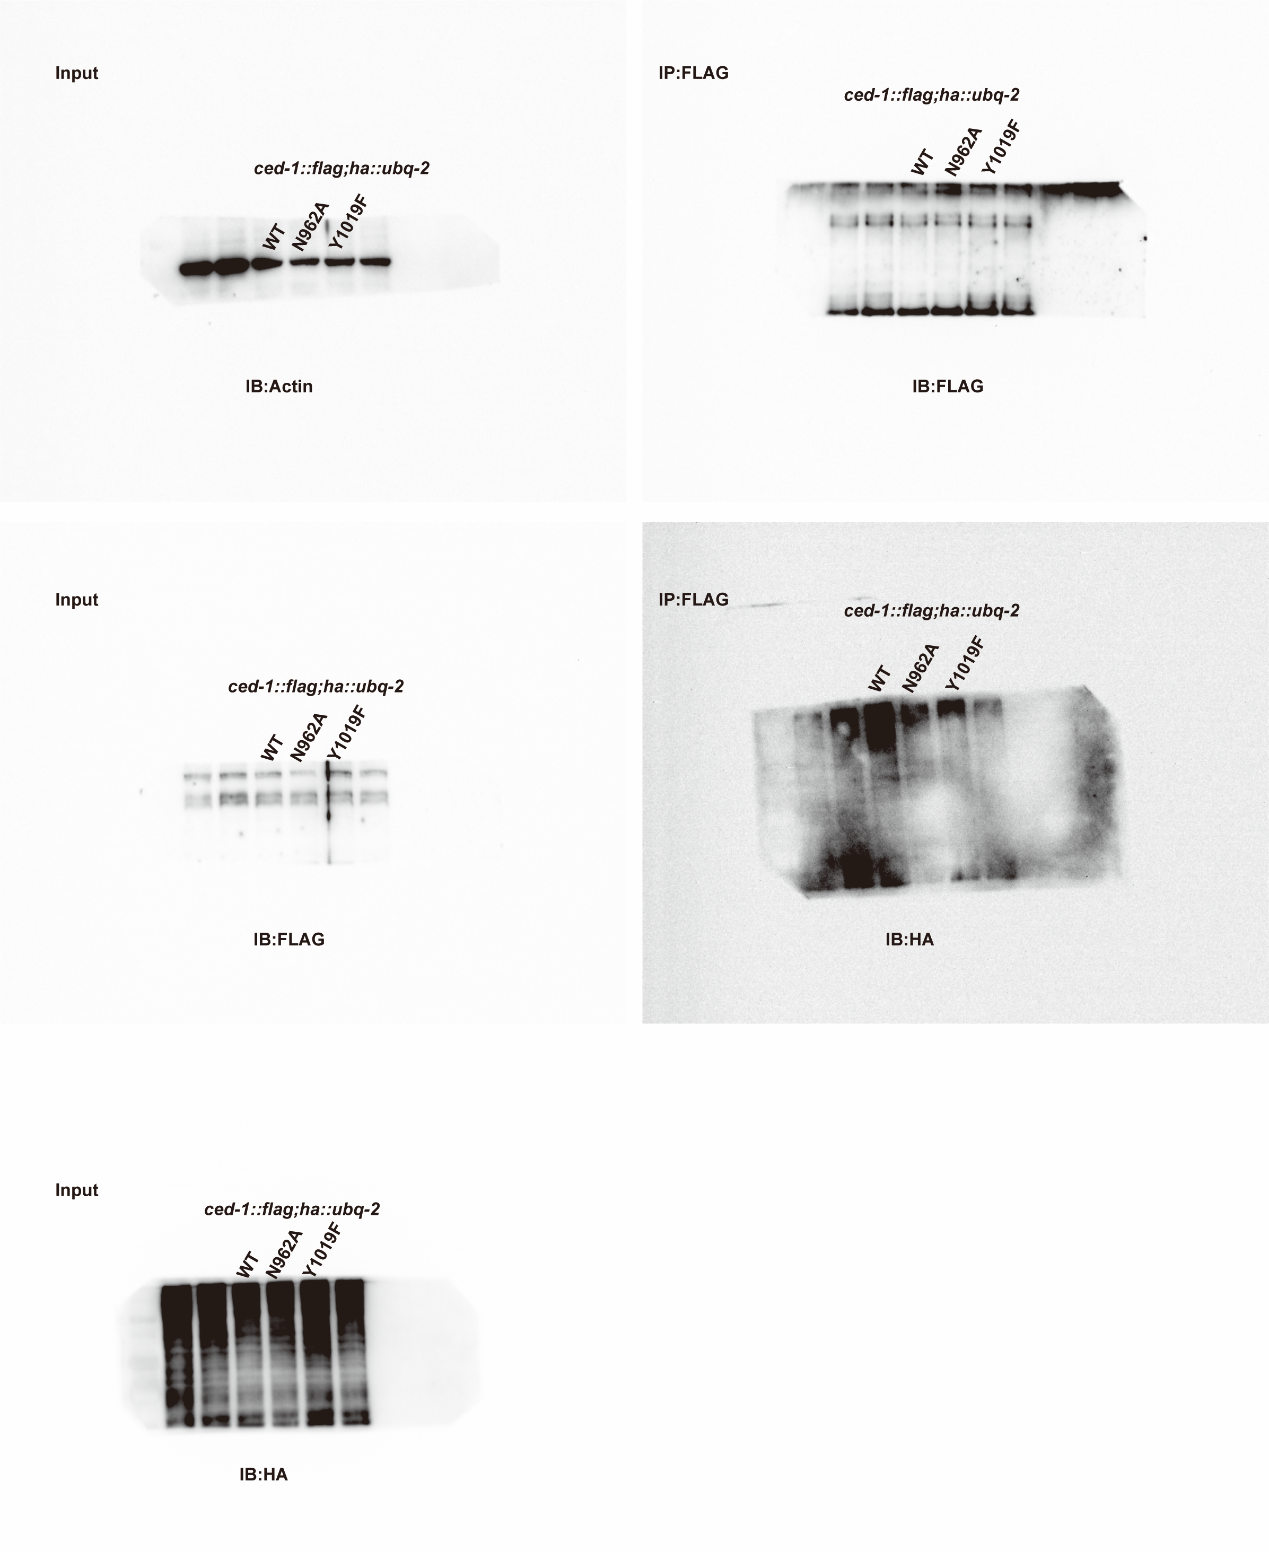

Supplement: fig4-figsupp1-data1 [file Figure 4-figure supplement 1 uncroppped blot with relevant bands.docx]
