# Supplementary material for: trim-21 promotes proteasomal degradation of CED-1 for apoptotic cell clearance in C. elegans
Source: eLife journal article supplement (doi:10.7554/elife.76436), 2022-08-05
Supplement: fig4-figsupp1-data1 [file Figure 4-figure supplement 1-Source Data 1.xlsx]

## Sheet: Figure 4-figure supplement 1C
q-PCR
		RNAi
		N2/control	N2/sta-2
ced-1/tbg-1	1st	1	0.83
ced-1/tbg-1	2nd	1	0.43
ced-1/tbg-1	3rd	1	0.66
	Mean	1	0.545
	SD		0.115
	SEM		0.0663953
	P-Value		0.0360088

## Sheet: Figure 4-figure supplement 1D
		RNAi
		N2/control	N2/sta-2
CED-1/Actin	1st	1	0.819932
CED-1/Actin	2nd	1	0.898229
CED-1/Actin	3rd	1	0.505888
CED-1/Actin	4th	1	0.3665
CED-1/Actin	5th	1	0.917501
CED-1/Actin	6th	1	0.718232
	Mean	1	0.70438
	SD		0.204167
	SEM		0.0833507
	P-Value		0.00890436

## Sheet: Figure 4-figure supplement 1E
			No. of germ cell corpses 48h post L4
			RNAi
			N2/control	N2/sta-2
			4	5
			4	9
			2	4
			4	3
			3	2
			8	2
			5	7
			2	6
			6	31
			4	31
			1	28
			2	6
			2	5
			3	4
			2	2
			1	4
			3	10
			5	1
			1	5
			3	7
			6	8
			3	7
			1	8
			4	8
			1	9
			4	11
			2	14
			4	1
			2	9
			9	8
		Mean	3.36667	8.5
		SD	1.97456	7.78781
		SEM	0.360504	1.42185
		P-Value		0.00108166

## Sheet: Figure 4-figure supplement 1K
			ced-1::flag
			1st	2nd	3rd		Mean	SD	SEM
		0	1	1	1		1
		3	0.424104	0.821446	0.762741		0.66943	0.17512	0.101105
		6	0.428964	0.620006	0.658721		0.56923	0.100435	0.057986
			-0.0951727	-0.0633323	-0.0568798
			ced-1(N962A)::flag
			1st	2nd	3rd
		0	0.999996	0.999998	1		0.999998
		3	1.15025	1.04002	1.1822		1.12415	0.0609036	0.0351627
		6	1.19189	1.18591	0.800659		1.05948	0.183033	0.105674
			0.0319818	0.0309847	-0.0332235	0.029355
			ced-1(Y1019F)::flag
			1st	2nd	3rd
		0	0.999997	1	1		0.999999
		3	1.18207	1.15171	0.92272		1.0855	0.115767	0.0668381
		6	0.713025	0.926461	0.953785		0.864424	0.107635	0.0621429
			-0.0478287	-0.0122565	-0.0077025	0.0470682

## Sheet: Figure 4-figure supplement 1M
		ubiquitination level of CED-1
		ced-1::flag; ha::ubq-2
		WT	N962A	Y1019F
UB/CED-1	1st	1	0.808204	0.670117
UB/CED-1	2nd	1	0.666411	0.857091
UB/CED-1	3rd	1	0.897892	0.832137
	Mean	1	0.790836	0.786448
	SD		0.0952967	0.082887
	SEM		0.0550196	0.0478549
	P-Value		0.0360801	0.0218947
