# Supplementary material for: trim-21 promotes proteasomal degradation of CED-1 for apoptotic cell clearance in C. elegans
Source: eLife journal article supplement (doi:10.7554/elife.76436), 2022-08-05
Supplement: fig5-data1 [file Figure 5-source Data 1.xlsx]

## Sheet: Figure 5A
		ced-6/control RNAi	ced-6/src-1 RNAi
CED-1/Actin	1st	1	1.23623
CED-1/Actin	2nd	1	1.29758
CED-1/Actin	3rd	1	1.50019
	Mean	1	1.34466
	SD		0.112789
	SEM		0.0651187
	P-Value		0.0124318

## Sheet: Figure 5F
		N2/control RNAi	N2/nck-1 RNAi
CED-1/Actin	1st	1	1.13126
CED-1/Actin	2nd	1	1.29711
CED-1/Actin	3rd	1	1.21228
	Mean	1	1.21355
	SD		0.0677176
	SEM		0.0390968
	P-Value		0.011162

## Sheet: Figure 5G
		ubiquitination level of CED-1
		ced-1::flag; ha::ubq-2
		control RNAi	nck-1 RNAi
UB/CED-1	1st	1	0.84895
UB/CED-1	2nd	1	0.761716
UB/CED-1	3rd	1	0.804514
	Mean	1	0.80506
	SD		0.0356153
	SEM		0.0205625
	P-Value		0.00150035

## Sheet: Figure 5H
No. of somatic cell corpses(Developmental Stages)
rde-1;Pced-1rde-1
control RNAi																Mean	SD	SEM	P-Value
comma	9	7	6	4	6	6	3	11	14	10	8	10	10	13	7	8.26667	3.02141	0.780123
1.5F	13	11	13	8	10	9	10	12	10	10	10	11	7	9	10	10.2	1.6	0.413118
2F	9	11	10	9	16	14	11	12	14	15	12	11	14	12	16	12.4	2.24499	0.579655
2.5F	7	8	4	4	4	5	5	4	5	6	7	5	4	6	5	5.26667	1.23648	0.319258
3F	3	4	4	3	3	5	3	4	2	3	3	2	3	3	2	3.13333	0.805536	0.207989
4F	0	2	0	2	0	0	0	0	1	0	0	0	0	0	0	0.333333	0.699206	0.180534
nck-1 RNAi
comma	10	13	11	12	11	8	9	10	9	10	9	12	7	9	18	10.5333	2.52631	0.652289	0.0400435
1.5F	11	12	11	13	14	12	15	12	14	13	10	13	10	16	14	12.6667	1.69967	0.438854	0.00047549
2F	13	18	24	14	20	16	13	10	15	12	14	19	21	12	12	15.5333	3.87929	1.00163	0.0141845
2.5F	8	7	5	11	8	9	8	6	7	7	8	8	6	9	8	7.66667	1.39841	0.361068	4.65349e-05
3F	3	4	5	4	3	3	3	5	3	3	4	2	4	2	5	3.53333	0.956847	0.247057	0.241502
4F	1	1	0	0	0	1	1	1	1	1	0	3	2	1	1	0.933333	0.771722	0.199258	0.0398393

## Sheet: Figure 5I
No. of germ cell corpses(Time post L4)
N2/control RNAi																Mean	SD	SEM	P-Value
12h	0	0	0	0	0	0	0	0	0	0	1	0	0	0	0	0.0666667	0.249444	0.0644061
24h	0	1	0	0	1	0	0	1	0	0	1	0	0	0	2	0.4	0.61101	0.157762
36h	2	4	3	2	1	3	2	1	5	2	3	4	1	3	3	2.6	1.1431	0.295146
48h	4	7	2	6	8	3	2	1	1	5	3	1	4	4	3	3.6	2.09125	0.539959
60h	6	1	5	6	10	4	3	3	6	3	1	5	2	7	3	4.33333	2.35702	0.608581
N2/nck-1 RNAi
12h	0	0	0	0	0	0	0	0	0	0	0	0	0	0	0	0	0	0	0.325875
24h	0	1	2	1	2	1	0	1	0	3	0	1	0	3	0	1	1.0328	0.266667	0.0718542
36h	3	4	7	2	9	7	5	5	6	3	7	5	2	4	3	4.8	2.00666	0.518116	0.0013328
48h	11	8	8	10	7	8	8	12	16	6	3	6	7	5	4	7.93333	3.19305	0.824441	0.000215467
60h	8	10	10	6	11	7	11	10	5	3	4	13	2	24	2	8.4	5.38888	1.3914	0.01517

## Sheet: Figure 5J
No. of germ cell corpses(Time post L4)
ced-1(e1735)/control RNAi																Mean	SD	SEM	P-Value
12h	0	0	0	0	0	2	0	1	0	0	0	0	0	0	0	0.2	0.541603	0.139841
24h	0	0	0	1	1	3	3	1	0	0	3	2	1	2	0	1.13333	1.14698	0.296148
36h	22	16	18	12	9	13	13	18	4	10	15	20	12	14	10	13.7333	4.49395	1.16033
48h	26	38	50	19	36	33	26	38	33	31	40	28	30	44	37	33.9333	7.5407	1.947
ced-1(e1735)/nck-1 RNAi
12h	0	0	1	0	0	1	0	0	0	4	0	2	1	0	0	0.6	1.08321	0.279682	0.22679
24h	4	4	6	7	6	5	6	5	10	13	11	4	4	2	5	6.13333	2.89521	0.747539	1.79324e-06
36h	24	40	38	15	32	21	35	33	42	31	31	41	37	30	32	32.1333	7.28347	1.88058	9.2632e-09
48h	60	60	68	60	57	63	75	79	53	50	75	60	66	60	70	63.7333	8.03714	2.07518	7.43444e-11
ced-2(n1994)/control RNAi
12h	0	0	3	1	4	4	0	3	3	1	1	3	1	2	1	1.8	1.37598	0.355278
24h	8	1	15	8	7	16	4	4	2	4	5	8	11	3	1	6.46667	4.49988	1.16186
36h	13	8	8	8	18	16	9	5	14	15	1	10	12	17	5	10.6	4.77214	1.23216
48h	20	45	12	35	32	31	26	10	20	5	10	43	8	10	20	21.8	12.5549	3.24167
ced-2(n1994)/nck-1 RNAi
12h	5	0	1	0	2	2	6	0	1	1	1	5	0	0	0	1.6	1.99332	0.514674	0.759641
24h	8	1	4	5	17	14	5	6	20	13	6	2	7	2	11	8.06667	5.53132	1.42818	0.408255
36h	35	20	14	32	42	22	70	42	21	25	49	45	60	48	32	37.1333	15.2616	3.94052	1.04571e-06
48h	50	73	64	83	62	72	73	40	56	74	50	70	80	47	72	64.4	12.5581	3.2425	9.87604e-10

## Sheet: Figure 5K
				The interactive intensity of CED-1 and nck-1
				Pced-1ced-1::gfp
				WT	Y1019F
		GFP/NCK-1	1st	1	0.180836
		GFP/NCK-1	2nd	1	0.253802
		GFP/NCK-1	3rd	1	0.507377
			Mean	1	0.314005
			SD		0.139942
			SEM		0.0807955
			P-Value		0.00227318
