# Supplementary material for: trim-21 promotes proteasomal degradation of CED-1 for apoptotic cell clearance in C. elegans
Source: eLife journal article supplement (doi:10.7554/elife.76436), 2022-08-05
Supplement: fig5-figsupp1-data1 [file Figure 5-figure supplement 1-Source Data 1.xlsx]

## Sheet: Figure 5-figure supplement 1B
		N2	nck-1(xwh51)
CED-1/Actin	1st	1	1.90141
CED-1/Actin	2nd	1	2.20671
CED-1/Actin	3rd	1	2.75087
CED-1/Actin	4th	1	1.9846
	Mean	1	2.2109
	SD		0.331126
	SEM		0.165563
	P-Value		0.000724584

## Sheet: Figure 5-figure supplement 1C
No. of germ cell corpses(Time post L4)
N2																Mean	SD	SEM	P-Value
12h	0	0	0	0	0	0	0	0	0	0	0	0	0	0	1	0.0666667	0.249444	0.0644061
24h	2	2	1	2	2	0	0	0	0	0	0	0	0	0	0	0.6	0.879394	0.227058
36h	2	1	2	1	3	1	1	2	3	1	1	1	1	3	3	1.73333	0.85375	0.220437
48h	3	3	2	1	3	2	3	3	4	5	3	3	4	1	1	2.73333	1.12349	0.290083
60h	3	3	2	1	3	2	4	4	6	1	4	1	1	5	3	2.86667	1.49963	0.387203
nck-1(xwh51)
12h	0	0	0	1	0	0	0	0	0	0	0	0	0	0	0	0.0666667	0.249444	0.0644061	1
24h	1	2	2	3	1	4	1	3	2	5	3	2	0	3	2	2.26667	1.23648	0.319258	0.000312683
36h	2	2	7	4	1	4	8	1	3	5	5	3	5	4	2	3.73333	1.98214	0.511787	0.00171574
48h	3	8	3	3	6	3	5	10	6	6	7	3	6	11	3	5.53333	2.55256	0.659068	0.000803859
60h	5	2	9	4	6	9	6	3	3	12	7	5	3	14	7	6.33333	3.33999	0.862383	0.00141001

## Sheet: Figure 5-figure supplement 1E
							ubiquitination level of CED-1
		Phsp-16trim-21::flag						ced-1::flag; ha::ubq-2
		WT	ced-6					WT	ced-6
TRIM-21/CED-1	1st	1	0.428481			UB/CED-1	1st	1	0.437301
TRIM-21/CED-1	2nd	1	0.392194			UB/CED-1	2nd	1	0.280983
TRIM-21/CED-1	3rd	1	0.223289			UB/CED-1	3rd	1	0.395398
	Mean	1	0.347988				4th	1	0.817258
	SD		0.0894115				Mean	1	0.482735
	SEM		0.0516217				SD		0.201433
	P-Value		0.000498767				SEM		0.100717
							P-Value		0.00433951
