# Supplementary material for: trim-21 promotes proteasomal degradation of CED-1 for apoptotic cell clearance in C. elegans
Source: eLife journal article supplement (doi:10.7554/elife.76436), 2022-08-05
Supplement: fig6-data1 [file Figure 6-source Data 1.xlsx]

## Sheet: Figure 6A
No. of somatic cell corpses(Developmental Stages)
N2																Mean	SD	SEM	P-Value
comma	11	11	12	9	12	11	9	10	12	9	11	9	11	10	7	10.2667	1.38884	0.358598
1.5 fold	13	8	11	13	12	12	13	12	11	12	12	11	13	11	14	11.8667	1.35974	0.351083
2 fold	10	9	10	13	14	11	16	11	13	16	11	10	15	11	12	12.1333	2.18683	0.564637
2.5 fold	4	5	4	6	9	4	8	6	8	5	6	9	4	5	8	6.06667	1.80616	0.466349
3 fold	1	0	1	3	2	1	0	1	3	2	4	3	2	1	1	1.66667	1.13529	0.293131
4 fold	0	0	1	1	1	0	1	2	1	0	0	1	1	0	1	0.666667	0.596285	0.15396
trim-21(xwh13)
comma	14	15	10	13	12	12	11	14	8	10	12	10	11	10	13	11.6667	1.84992	0.477649	0.0314788
1.5 fold	16	9	10	14	12	17	20	9	18	13	17	15	11	15	13	13.9333	3.23454	0.835154	0.0359235
2 fold	17	16	16	13	12	13	15	15	12	11	15	17	13	16	12	14.2	1.93907	0.500666	0.0132192
2.5 fold	10	8	7	8	8	3	6	6	7	6	7	8	9	8	5	7.06667	1.65193	0.426528	0.137569
3 fold	4	4	5	1	6	1	3	1	4	2	3	3	4	5	2	3.2	1.51438	0.39101	0.00519848
4 fold	0	0	0	1	1	1	0	0	1	0	0	1	0	2	1	0.533333	0.618241	0.159629	0.566009
ubc-21(xwh16)
comma	9	9	12	10	10	11	12	13	12	10	13	12	13	15	12	11.5333	1.62754	0.420229	0.0350575
1.5 fold	15	14	12	18	11	16	18	12	10	13	15	11	16	13	14	13.8667	2.39072	0.617282	0.0110661
2 fold	13	17	12	13	20	21	13	21	20	18	15	18	19	19	21	17.3333	3.1763	0.820117	2.44958e-05
2.5 fold	7	5	12	11	9	7	7	6	4	5	6	7	5	8	9	7.2	2.19697	0.567255	0.147143
3 fold	4	0	12	1	1	2	2	4	3	1	0	1	1	2	3	2.46667	2.82528	0.729485	0.333988
4 fold	0	2	12	0	0	1	1	0	0	0	0	0	1	0	0	1.13333	2.96348	0.765168	0.56813
trim-21;ubc-21
comma	9	11	7	10	6	14	13	13	14	11	11	12	8	11	13	10.8667	2.39072	0.617282	0.423656	0.330545	0.395745
1.5 fold	15	15	16	11	17	12	16	12	16	12	15	14	16	16	14	14.4667	1.82087	0.470146	0.000197091	0.595089	0.461266
2 fold	14	13	19	16	12	15	16	17	17	15	15	11	15	20	16	15.4	2.30362	0.594792	0.000630506	0.147103	0.0758456
2.5 fold	4	9	10	6	3	9	10	7	6	5	8	7	8	10	8	7.33333	2.1187	0.547046	0.099772	0.713142	0.871334
3 fold	2	3	5	3	2	3	2	1	3	4	1	2	3	4	3	2.73333	1.06249	0.274334	0.0159007	0.353305	0.74344
4 fold	1	1	0	1	1	0	1	0	1	2	1	0	0	0	0	0.6	0.61101	0.157762	0.772307	0.776247	0.514958

## Sheet: Figure 6B
		Duration of cell corpse(min)
		N2	trim-21(xwh13)
		54	55
		28	16
		36	37
		23	33
		22	52
		43	17
		31	94
		29	58
		37	38
		23	35
		20	11
		30	39
		15	48
		31	64
		46	36
		23	53
		88	55
		36	27
		33	102
		30	25
		39	49
		36	41
		20	33
		16	70
		38	158
		34	27
		24	63
		43	64
		12	38
		30	21
	Mean	32.3333	48.6333
	SD	14.0198	29.0339
	SEM	2.55966	5.30084
	P-Value		0.00854261

## Sheet: Figure 6C
No. of germ cell corpses(Time post L4)
trim-21(xwh13)																Mean	SD	SEM	P-Value
12h	1	0	1	0	0	0	0	0	0	0	0	0	0	0	1	0.2	0.4	0.10328
24h	5	3	1	2	1	5	2	1	0	4	1	0	2	5	3	2.33333	1.69967	0.438854
36h	8	3	5	4	3	3	5	5	3	2	2	1	2	3	3	3.46667	1.668	0.430676
48h	3	5	6	2	7	6	1	2	4	4	3	4	5	4	12	4.53333	2.55256	0.659068
ced-1(e1735)
12h	1	0	0	0	0	0	4	0	2	0	0	0	0	1	1	0.6	1.08321	0.279682
24h	3	10	4	4	9	10	2	6	8	4	14	14	8	10	5	7.4	3.66606	0.946573
36h	14	36	23	27	42	36	37	13	32	33	51	44	24	47	41	33.3333	10.9463	2.82633
48h	46	67	71	50	59	32	72	39	57	70	55	60	60	86	60	58.9333	13.2387	3.41821
ced-1;trim-21
12h	0	0	5	1	1	0	0	1	4	0	3	1	0	2	2	1.33333	1.53478	0.396279	0.155243
24h	14	12	9	2	10	11	8	8	10	7	14	9	21	10	8	10.2	4.0365	1.04222	0.0649246
36h	39	40	35	36	34	37	51	40	26	36	24	32	27	30	40	35.1333	6.60168	1.70455	0.602433
48h	56	65	55	50	45	60	62	52	70	75	55	50	48	62	55	57.3333	8.06364	2.08202	0.702262

## Sheet: Figure 6F
somatic cell corpses labeled by phagosomal markers
N2				Mean	SD	SEM	P-Value
CED-1::GFP	43	36	38	39	2.94392	1.69967
GFP::RAB-5	51	43	38	44	5.35413	3.09121
GFP::RAB-7	61	53	67	60.3333	5.73488	3.31104
LAAT-1::mCHERRY	50	54	55	53	2.16025	1.24722
NUC-1::mCHERRY	38	37	42	39	2.16025	1.24722
CPL-1::mChOint	39	36	34	36.3333	2.0548	1.18634
trim-21(xwh12)
CED-1::GFP	37	45	36	39.3333	4.02768	2.32538	0.929263
GFP::RAB-5	47	40	42	43	2.94392	1.69967	0.828319
GFP::RAB-7	55	62	57	58	2.94392	1.69967	0.635693
LAAT-1::GFP	33	36	28	32.3333	3.29983	1.90516	0.00176935
NUC-1::mCHERRY	25	27	22	24.6667	2.0548	1.18634	0.00244468
CPL-1::mChOint	23	27	28	26	2.16025	1.24722	0.00803515

## Sheet: Figure 6G
germ cell corpses labeled by phagosomal markers
N2				Mean	SD	SEM	P-Value
CED-1::GFP	98	99	97	98	0.816497	0.471405
GFP::RAB-5	92	95	98	95	2.44949	1.41421
GFP::RAB-7	99	99	98	98.6667	0.471405	0.272166
LAAT-1::mCHERRY	81	80	79	80	0.816497	0.471405
NUC-1::mCHERRY	78	80	79	79	0.816497	0.471405
CPL-1::mChOint	80	80	84	81.3333	1.88562	1.08866
trim-21(xwh12)
CED-1::GFP	97	97	92	95.3333	2.35702	1.36083	0.205106
GFP::RAB-5	93	96	99	96	2.44949	1.41421	0.704
GFP::RAB-7	100	99	99	99.3333	0.471405	0.272166	0.2302
LAAT-1::GFP	66	67	66	66.3333	0.471405	0.272166	3.34409e-05
NUC-1::mCHERRY	73	72	74	73	0.816497	0.471405	0.00182626
CPL-1::mChOint	75	76	74	75	0.816497	0.471405	0.0120725

## Sheet: Figure 6H
AO staining labeled
	N2	trim-21
	70	50
	65	42
	70	41.6
Mean	68.3333	44.5333
SD		3.86896
SEM		2.23375
P-Value		0.00175231
