# Supplementary material for: trim-21 promotes proteasomal degradation of CED-1 for apoptotic cell clearance in C. elegans
Source: eLife journal article supplement (doi:10.7554/elife.76436), 2022-08-05
Supplement: fig6-figsupp1-data1 [file Figure 6-figure supplement 1-Source Data 1.xlsx]

## Sheet: Figure 6-figure supplement 1A
No. of germ cell corpses(Time post L4)
N2																Mean	SD	SEM	P-Value
12h	0	0	0	0	0	0	0	0	0	0	0	0	0	0	1	0.0666667	0.249444	0.0644061
24h	2	2	1	2	2	0	0	0	0	0	0	0	0	0	0	0.6	0.879394	0.227058
36h	2	1	2	1	3	1	1	2	3	1	1	1	1	3	3	1.73333	0.85375	0.220437
48h	3	3	2	1	3	2	3	3	4	5	3	3	4	1	1	2.73333	1.12349	0.290083
60h	3	3	2	1	3	2	4	4	6	1	4	1	1	5	3	2.86667	1.49963	0.387203
trim-21(xwh13)
12h	1	0	1	0	0	0	0	0	0	0	0	0	0	0	1	0.2	0.4	0.10328	0.298964
24h	5	3	1	2	1	5	2	1	0	4	1	0	2	5	3	2.33333	1.69967	0.438854	0.00210118
36h	8	3	5	4	3	3	5	5	3	2	2	1	2	3	3	3.46667	1.668	0.430676	0.00174367
48h	3	5	6	2	7	6	1	2	4	4	3	4	5	4	12	4.53333	2.55256	0.659068	0.0225166
60h	3	8	4	3	2	1	10	4	14	5	3	7	8	4	4	5.33333	3.33999	0.862383	0.0176816
ubc-21(xwh16)
12h	2	1	1	0	0	0	0	0	1	2	0	0	1	0	0	0.533333	0.718022	0.185392	0.0292955
24h	5	1	0	1	3	3	1	0	0	0	1	0	1	1	0	1.13333	1.40791	0.363522	0.239374
36h	3	3	3	4	4	6	2	11	9	5	7	1	5	3	6	4.8	2.58715	0.667999	0.000237584
48h	4	2	14	9	9	20	13	7	8	5	10	3	10	14	1	8.6	5.04381	1.30231	0.000215416
60h	19	11	15	15	10	11	28	8	15	2	6	13	4	6	12	11.6667	6.26808	1.61841	2.05938e-05
trim-21;ubc-21
12h	1	1	0	1	3	0	0	0	0	1	0	0	0	0	0	0.466667	0.805536	0.207989	0.0868009	0.276695	0.818871
24h	0	2	7	1	2	1	0	1	0	1	6	2	1	1	1	1.73333	1.98214	0.511787	0.0605637	0.397205	0.363698
36h	4	7	0	10	6	1	12	6	5	4	3	3	3	10	8	5.46667	3.32399	0.85825	0.000347896	0.0539118	0.558469
48h	4	10	9	7	6	28	10	6	4	7	4	9	11	10	7	8.8	5.61189	1.44898	0.000460068	0.0150822	0.921704
60h	7	13	26	26	16	6	12	12	15	5	16	7	5	7	11	12.2667	6.54692	1.69041	1.45268e-05	0.00145917	0.806182

## Sheet: Figure 6-figure supplement 1B
	No. of germ cell corpses
Duration of cell corpse(min)	N2	trim-21(xwh12)
0-10	1	0
11-20	4	0
21-30	4	0
31-40	11	1
41-50	5	0
51-60	4	3
61-70	0	2
71-80	0	0
81-90	1	1
91-100	0	1
>100	0	22

## Sheet: Figure 6-figure supplement 1C
			No. of somatic cell corpses
		Time post first cleavage(min)	N2	b0281.8
		200	0	2
		210	4	3
		220	5	6
		230	2	1
		240	2	3
		250	4	2
		260	1	2
		270	2	2
		280	3	8
		290	1	5
		300	4	8
		310	2	7
		320	4	6
		330	9	5
		340	2	2
		350	4	7
		360	4	5
		370	7	3

## Sheet: Figure 6-figure supplement 1D
No. of somatic cell corpses(Developmental Stages)
N2																Mean	SD	SEM	P-Value
comma	11	5	12	11	11	8	10	5	7	6	12	9	8	12	11	9.2	2.45493	0.633859
1.5 fold	9	8	12	10	11	9	10	10	11	15	14	12	12	16	10	11.2667	2.20504	0.56934
Phsp-16trim-21::flag
comma	12	10	10	8	12	8	14	9	11	15	10	18	9	15	15	11.7333	2.93182	0.756992	0.0194722
1.5 fold	15	12	11	14	12	15	18	11	11	18	16	19	14	15	14	14.3333	2.54733	0.657718	0.00201251

## Sheet: Figure 6-figure supplement 1E
No. of somatic cell corpses(Developmental Stages)
N2																Mean	SD	SEM	P-Value
comma	11	11	12	9	12	11	9	10	12	9	11	9	11	10	7	10.2667	1.38884	0.358598
1.5 fold	13	8	11	13	12	12	13	12	11	12	12	11	13	11	14	11.8667	1.35974	0.351083
2 fold	10	9	10	13	14	11	16	11	13	16	11	10	15	11	12	12.1333	2.18683	0.564637
2.5 fold	4	5	4	6	9	4	8	6	8	5	6	9	4	5	8	6.06667	1.80616	0.466349
3 fold	1	0	1	3	2	1	0	1	3	2	4	3	2	1	1	1.66667	1.13529	0.293131
4 fold	0	0	1	1	1	0	1	2	1	0	0	1	1	0	1	0.666667	0.596285	0.15396
Pced-1trim-21::flag line1
comma	15	13	11	13	9	14	13	14	17	10	11	13	13	11	10	12.4667	2.06128	0.532221	0.00256164
1.5F	17	15	16	13	16	11	14	17	16	18	15	14	14	21	16	15.5333	2.24697	0.580166	1.50467e-05
2F	14	15	15	16	13	18	14	12	16	15	13	14	12	16	14	14.4667	1.58605	0.409516	0.00314138
2.5F	7	8	9	4	7	8	6	7	9	6	7	8	9	10	4	7.26667	1.69181	0.436824	0.0803591
3F	3	3	2	3	3	4	4	1	2	2	3	2	2	3	3	2.66667	0.788811	0.20367	0.0114482
4F	1	0	0	2	1	1	2	0	0	0	1	0	0	1	0	0.6	0.711805	0.183787	0.79018
Pced-1trim-21::flag line2
comma	13	9	14	12	13	12	14	13	11	12	8	15	9	13	11	11.9333	1.94822	0.503028	0.0144965
1.5F	14	15	14	14	16	15	11	11	19	11	11	21	18	18	15	14.8667	3.03022	0.782399	0.00215232
2F	17	18	16	15	13	14	17	16	12	13	14	15	16	12	13	14.7333	1.8427	0.475784	0.00203262
2.5F	7	9	7	7	4	6	10	7	9	7	4	6	10	9	8	7.33333	1.81353	0.468251	0.0746427
3F	1	3	7	2	3	3	1	2	4	3	2	2	1	3	4	2.73333	1.48174	0.382584	0.0413774
4F	0	0	0	1	0	2	1	0	0	3	1	0	0	1	0	0.6	0.879394	0.227058	0.816094
Pced-1trim-21::flag line3
comma	12	12	17	15	15	13	11	8	9	15	12	10	12	13	10	12.2667	2.4074	0.621587	0.0118364
1.5F	19	15	20	13	11	15	15	13	12	14	15	15	16	10	12	14.3333	2.62467	0.677687	0.00414171
2F	16	21	16	16	15	20	16	16	12	14	13	16	15	12	12	15.3333	2.54733	0.657718	0.00132586
2.5F	8	8	10	9	7	11	4	7	8	9	6	7	4	6	9	7.53333	1.92758	0.497698	0.0470448
3F	3	3	3	1	3	2	2	3	4	1	2	4	3	2	3	2.6	0.879394	0.227058	0.0216727
4F	1	0	0	0	1	1	1	0	0	0	0	1	1	1	0	0.466667	0.498888	0.128812	0.344021

## Sheet: Figure 6-figure supplement 1F
No. of germ cell corpses(Time post L4)
N2																Mean	SD	SEM	P-Value
12h	0	0	0	0	0	0	0	0	0	0	0	0	0	0	1	0.0666667	0.249444	0.0644061
24h	2	2	1	2	2	0	0	0	0	0	0	0	0	0	0	0.6	0.879394	0.227058
36h	2	1	2	1	3	1	1	2	3	1	1	1	1	3	3	1.73333	0.85375	0.220437
48h	3	3	2	1	3	2	3	3	4	5	3	3	4	1	1	2.73333	1.12349	0.290083
60h	3	3	2	1	3	2	4	4	6	1	4	1	1	5	3	2.86667	1.49963	0.387203
Pced-1trim-21::flag line1
12h	1	2	4	2	1	1	2	1	2	0	5	0	0	0	0	1.4	1.45144	0.374759	0.00210921
24h	7	0	3	2	2	4	2	1	0	2	4	3	3	4	1	2.53333	1.74611	0.450843	0.000933305
36h	4	2	0	3	1	1	2	5	6	2	1	0	1	5	6	2.6	2.02649	0.523238	0.151459
48h	5	10	17	8	12	14	12	6	6	9	16	10	9	9	14	10.4667	3.51884	0.90856	1.5622e-08
60h	5	3	6	10	5	5	9	4	13	6	16	4	8	4	5	6.86667	3.57522	0.923119	0.000610263
Pced-1trim-21::flag line2
12h	1	0	1	0	1	0	0	1	2	0	0	0	0	0	1	0.466667	0.618241	0.159629	0.0328508
24h	5	6	1	5	1	5	1	1	3	4	1	2	0	0	0	2.33333	2.0548	0.530548	0.00715301
36h	2	1	7	8	2	1	2	6	3	1	4	11	4	3	1	3.73333	2.90899	0.751098	0.019944
48h	4	9	5	4	12	12	11	9	4	6	8	4	14	9	5	7.73333	3.31595	0.856176	1.08502e-05
60h	7	0	9	5	5	8	5	9	6	16	5	10	8	14	4	7.4	3.84361	0.992416	0.000311614
Pced-1trim-21::flag line3
12h	0	0	1	0	4	0	0	1	1	4	0	0	1	0	0	0.8	1.32665	0.34254	0.0516682
24h	6	1	4	2	2	4	2	7	3	0	8	0	6	4	3	3.46667	2.36267	0.610039	0.000211554
36h	8	8	7	3	3	12	2	1	0	2	4	4	6	2	3	4.33333	3.13404	0.809206	0.00568813
48h	11	8	3	14	7	3	8	3	7	6	10	5	7	3	3	6.53333	3.24277	0.83728	0.000286047
60h	6	10	7	21	5	10	20	4	4	3	9	8	4	4	5	8	5.37897	1.38884	0.00184382

## Sheet: Figure 6-figure supplement 1H
N2
12h	0	0	0	0	0	0	0	0	0	0	0	0	0	0	1	0.0666667	0.249444	0.0644061
24h	2	2	1	2	2	0	0	0	0	0	0	0	0	0	0	0.6	0.879394	0.227058
36h	2	1	2	1	3	1	1	2	3	1	1	1	1	3	3	1.73333	0.85375	0.220437
48h	3	3	2	1	3	2	3	3	4	5	3	3	4	1	1	2.73333	1.12349	0.290083
60h	3	3	2	1	3	2	4	4	6	1	4	1	1	5	3	2.86667	1.49963	0.387203
trim-21
12h	1	0	1	0	0	0	0	0	0	0	0	0	0	0	1	0.2	0.4	0.10328	0.298964
24h	5	3	1	2	1	5	2	1	0	4	1	0	2	5	3	2.33333	1.69967	0.438854	0.00210118
36h	8	3	5	4	3	3	5	5	3	2	2	1	2	3	3	3.46667	1.668	0.430676	0.00174367
48h	3	5	6	2	7	6	1	2	4	4	3	4	5	4	12	4.53333	2.55256	0.659068	0.0225166
60h	3	8	4	3	2	1	10	4	14	5	3	7	8	4	4	5.33333	3.33999	0.862383	0.0176816
Pced-1ced-1::flag
12h	0	1	0	0	0	1	0	0	0	0	1	2	0	0	0	0.333333	0.596285	0.15396	0.133891
24h	15	3	2	1	7	2	7	4	12	5	4	7	1	3	0	4.86667	4.0475	1.04506	0.000620128
36h	2	10	16	7	13	8	4	8	7	10	6	4	3	9	18	8.33333	4.43722	1.14568	7.78866e-06
48h	42	5	5	28	7	19	20	7	32	25	13	10	13	14	7	16.4667	10.7136	2.76625	5.19957e-05
60h	45	18	20	31	13	31	75	50	9	17	34	50	33	13	43	32.1333	17.5304	4.52633	1.00408e-06
trim-21；Pced-1ced-1::flag
12h	0	0	0	0	1	0	0	0	0	0	1	0	0	0	0	0.133333	0.339935	0.0877707	0.55886	0.638337	0.28489
24h	3	2	4	3	3	0	3	0	3	3	3	0	6	4	1	2.53333	1.62754	0.420229	0.000534103	0.752845	0.0551389
36h	7	11	16	5	4	31	26	22	7	15	20	14	18	5	6	13.8	8.10925	2.0938	6.40529e-06	6.83296e-05	0.0352385
48h	54	39	20	24	68	11	62	50	83	64	47	56	18	47	31	44.9333	20.0681	5.18156	1.47763e-08	3.87249e-08	6.61253e-05
60h	64	53	36	83	83	69	55	32	58	60	63	87	43	10	82	58.5333	20.9312	5.40442	1.1349e-10	3.7798e-10	0.00115841

## Sheet: Figure 6-figure supplement 1I
No. of germ cell corpses(Time post L4)
N2																Mean	SD	SEM	P-Value
12h	0	0	0	0	0	0	0	0	0	0	0	0	0	0	1	0.0666667	0.249444	0.0644061
24h	2	2	1	2	2	0	0	0	0	0	0	0	0	0	0	0.6	0.879394	0.227058
36h	2	1	2	1	3	1	1	2	3	1	1	1	1	3	3	1.73333	0.85375	0.220437
48h	3	3	2	1	3	2	3	3	4	5	3	3	4	1	1	2.73333	1.12349	0.290083
60h	3	3	2	1	3	2	4	4	6	1	4	1	1	5	3	2.86667	1.49963	0.387203
trim-21(xwh13)
12h	1	0	1	0	0	0	0	0	0	0	0	0	0	0	1	0.2	0.4	0.10328	0.298964
24h	5	3	1	2	1	5	2	1	0	4	1	0	2	5	3	2.33333	1.69967	0.438854	0.00210118
36h	8	3	5	4	3	3	5	5	3	2	2	1	2	3	3	3.46667	1.668	0.430676	0.00174367
48h	3	5	6	2	7	6	1	2	4	4	3	4	5	4	12	4.53333	2.55256	0.659068	0.0225166
60h	3	8	4	3	2	1	10	4	14	5	3	7	8	4	4	5.33333	3.33999	0.862383	0.0176816
Ptrim-21trim-21::gfp line1/trim-21(xwh13)
12h	0	0	0	0	0	0	0	0	0	0	0	0	0	0	0	0	0	0	0.325875
24h	0	0	0	1	0	0	0	0	1	0	1	0	0	0	1	0.266667	0.442217	0.11418	0.215563
36h	1	1	2	2	2	1	0	3	2	1	2	3	1	2	2	1.66667	0.788811	0.20367	0.831635
48h	1	7	2	1	2	2	1	3	2	1	1	3	2	2	3	2.2	1.46969	0.379473	0.289918
60h	1	1	5	3	2	3	1	2	0	4	4	0	5	1	4	2.4	1.66533	0.429987	0.442425
Ptrim-21trim-21::gfp line2/trim-21(xwh13)
12h	0	0	0	0	0	0	0	0	0	0	0	0	0	0	0	0	0	0	0.325875
24h	0	1	1	1	0	0	0	0	0	0	0	1	0	2	0	0.4	0.61101	0.157762	0.490419
36h	0	5	0	3	5	2	1	2	3	3	3	0	1	4	1	2.2	1.64114	0.42374	0.353305
48h	1	3	4	5	5	5	0	1	4	2	2	1	2	2	2	2.6	1.58325	0.408792	0.799075
60h	0	1	0	0	5	1	1	1	11	3	2					2.27273	3.10691	0.802201	0.541305
Ptrim-21trim-21::gfp line3/trim-21(xwh13)
12h	0	0	0	0	0	0	0	0	0	0	0	0	0	0	0	0	0	0	0.325875
24h	0	0	0	0	0	0	0	1	1	0	0	0	1	0	1	0.266667	0.442217	0.11418	0.215563
36h	0	2	0	0	3	0	0	0	1	2	1	0	2	4	3	1.2	1.32665	0.34254	0.21633
48h	2	5	3	3	1	4	4	1	2	1	4	5	2	2	3	2.8	1.32665	0.34254	0.886934
60h	2	3	3	3	4	2	5	8	2	1	1	4	2	2	0	2.8	1.86905	0.482586	0.917835

## Sheet: Figure 6-figure supplement 1J
No. of somatic cell corpses(Developmental Stages)
N2																Mean	SD	SEM	P-Value
comma	11	11	12	9	12	11	9	10	12	9	11	9	11	10	7	10.2667	1.38884	0.358598
1.5 fold	13	8	11	13	12	12	13	12	11	12	12	11	13	11	14	11.8667	1.35974	0.351083
2 fold	10	9	10	13	14	11	16	11	13	16	11	10	15	11	12	12.1333	2.18683	0.564637
2.5 fold	4	5	4	6	9	4	8	6	8	5	6	9	4	5	8	6.06667	1.80616	0.466349
3 fold	1	4	4	6	3	3	0	3	1	2	4	2	2	1	1	2.46667	1.54344	0.398516
4 fold	0	0	1	1	1	0	1	2	1	0	0	1	1	0	1	0.666667	0.596285	0.15396
trim-21(xwh13)
comma	14	15	10	13	12	12	11	14	8	10	12	10	11	10	13	11.6667	1.84992	0.477649	0.0314788
1.5 fold	16	9	10	14	12	17	20	9	18	13	17	15	11	15	13	13.9333	3.23454	0.835154	0.0359235
2 fold	17	16	16	13	12	13	15	15	12	11	15	17	13	16	12	14.2	1.93907	0.500666	0.0132192
2.5 fold	10	8	7	8	8	3	6	6	7	6	7	8	9	8	5	7.06667	1.65193	0.426528	0.137569
3 fold	4	4	5	1	6	1	3	1	4	2	3	3	4	5	2	3.2	1.51438	0.39101	0.214902
4 fold	0	0	0	1	1	1	0	0	1	0	0	1	0	2	1	0.533333	0.618241	0.159629	0.566009
Ptrim-21trim-21::gfp line1/trim-21(xwh13)
comma	12	12	10	10	13	8	14	11	9	12	10	8	12	7	9	10.4667	1.96186	0.50655	0.75786
1.5 fold	16	12	14	15	13	11	13	14	13	12	12	11	11	14	12	12.8667	1.45449	0.375549	0.0706631
2 fold	11	14	10	11	12	11	11	11	13	14	11	12	13	12	13	11.9333	1.18134	0.30502	0.76558
2.5 fold	9	10	6	8	7	6	7	6	6	7	6	6	6	7	8	7	1.21106	0.312694	0.119514
3 fold	4	3	3	3	4	3	3	2	2	5	3	2	4	3	4	3.2	0.832666	0.214994	0.12891
4 fold	2	0	0	1	0	1	0	0	0	0	0	1	1	0	0	0.4	0.61101	0.157762	0.25238
Ptrim-21trim-21::gfp line2/trim-21(xwh13)
comma	9	12	10	9	9	10	10	8	10	10	8	12	6	8	10	9.4	1.49666	0.386437	0.12347
1.5 fold	14	16	13	11	13	13	13	12	7	12	9	16	15	13	13	12.6667	2.29976	0.593795	0.272062
2 fold	16	15	13	12	11	16	13	12	12	12	15	14	12	13	13	13.2667	1.52607	0.39403	0.123018
2.5 fold	8	8	5	5	8	7	10	4	10	8	4	8	8	4	5	6.8	2.03961	0.526624	0.322483
3 fold	2	3	1	4	3	3	4	3	3	4	4	1	2	3	3	2.86667	0.956847	0.247057	0.416812
4 fold	0	0	0	0	0	0	0	0	0	0	0	0	0	0	1	0.0666667	0.249444	0.0644061	0.00168969
Ptrim-21trim-21::gfp line3/trim-21(xwh13)
comma	12	15	11	10	10	13	8	8	6	8	14	9	12	10	8	10.2667	2.46216	0.635726	1
1.5 fold	13	14	14	13	12	16	13	14	14	13	14	11	11	11	17	13.3333	1.65999	0.428607	0.0162479
2 fold	15	15	12	12	11	12	11	13	14	14	11	14	12	16	13	13	1.54919	0.4	0.236394
2.5 fold	6	7	5	8	9	10	10	6	5	7	7	6	5	8	7	7.06667	1.61107	0.415977	0.133344
3 fold	2	3	4	5	2	3	3	4	3	3	4	2	5	3	3	3.26667	0.928559	0.239753	0.107706
4 fold	0	0	0	0	0	0	1	1	0	0	0	0	3	1	0	0.4	0.8	0.206559	0.325875

## Sheet: Figure 6-figure supplement 1K
No. of somatic cell corpses(Developmental Stages)
N2																Mean	SD	SEM	P-Value
comma	11	11	12	9	12	11	9	10	12	9	11	9	11	10	7	10.2667	1.38884	0.358598
1.5 fold	13	8	11	13	12	12	13	12	11	12	12	11	13	11	14	11.8667	1.35974	0.351083
2 fold	10	9	10	13	14	11	16	11	13	16	11	10	15	11	12	12.1333	2.18683	0.564637
2.5 fold	4	5	4	6	9	4	8	6	8	5	6	9	4	5	8	6.06667	1.80616	0.466349
3 fold	1	4	4	6	3	3	0	3	1	2	4	2	2	1	1	2.46667	1.54344	0.398516
4 fold	0	0	1	1	1	0	1	2	1	0	0	1	1	0	1	0.666667	0.596285	0.15396
trim-21(xwh13)
comma	14	15	10	13	12	12	11	14	8	10	12	10	11	10	13	11.6667	1.84992	0.477649	0.0314788
1.5 fold	16	9	10	14	12	17	20	9	18	13	17	15	11	15	13	13.9333	3.23454	0.835154	0.0359235
2 fold	17	16	16	13	12	13	15	15	12	11	15	17	13	16	12	14.2	1.93907	0.500666	0.0132192
2.5 fold	10	8	7	8	8	3	6	6	7	6	7	8	9	8	5	7.06667	1.65193	0.426528	0.137569
3 fold	4	4	5	1	6	1	3	1	4	2	3	3	4	5	2	3.2	1.51438	0.39101	0.214902
4 fold	0	0	0	1	1	1	0	0	1	0	0	1	0	2	1	0.533333	0.618241	0.159629	0.566009
Ptrim-21htrim21 line1/trim-21(xwh13)
comma	11	9	12	9	11	10	13	12	8	10	12	10	9	11	10	10.4667	1.35974	0.351083	0.703137
1.5 fold	15	10	10	11	11	12	11	12	15	12	11	11	13	11	13	11.8667	1.49963	0.387203	1
2 fold	10	11	17	10	12	10	11	10	12	15	12	12	12	13	14	12.0667	1.94822	0.503028	0.932733
2.5 fold	3	5	4	5	6	5	5	8	7	9	5	5	6	4	4	5.4	1.54056	0.397772	0.302353
3 fold	2	1	1	3	2	2	3	2	2	2	1	1	4	3	3	2.13333	0.884433	0.22836	0.489013
4 fold	0	0	0	1	0	0	1	0	1	0	0	0	0	0	0	0.2	0.4	0.10328	0.0216727
Ptrim-21htrim21 line2/trim-21(xwh13)
comma	10	14	6	10	12	11	11	7	11	11	11	10	12	9	10	10.3333	1.88562	0.486864	0.915934
1.5 fold	10	11	12	15	14	12	12	10	8	11	11	11	16	12	11	11.7333	1.94822	0.503028	0.835198
2 fold	12	10	10	10	12	10	11	15	9	11	15	13	12	10	11	11.4	1.74356	0.450185	0.334959
2.5 fold	5	6	9	6	3	5	5	6	9	8	4	5	5	6	3	5.66667	1.77639	0.458661	0.559402
3 fold	0	1	2	2	1	2	3	1	0	3	2	2	1	3	2	1.66667	0.942809	0.243432	0.109086
4 fold	1	1	1	2	1	0	0	0	0	0	0	0	0	0	0	0.4	0.61101	0.157762	0.25238
Ptrim-21htrim21 line3/trim-21(xwh13)
comma	9	7	8	14	10	11	9	11	10	9	11	7	12	11	9	9.86667	1.82087	0.470146	0.518738
1.5 fold	14	13	12	11	13	15	12	14	10	13	13	10	11	12	14	12.4667	1.45449	0.375549	0.269093
2 fold	11	8	12	9	8	11	10	11	8	12	9	10	12	14	10	10.3333	1.69967	0.438854	0.0216797
2.5 fold	4	7	9	8	5	4	5	5	6	5	8	10	5	4	6	6.06667	1.8427	0.475784	1
3 fold	3	3	3	3	2	2	3	3	2	1	1	4	3	3	2	2.53333	0.805536	0.207989	0.887099
4 fold	0	1	0	0	0	1	0	0	0	0	1	1	1	0	0	0.333333	0.471405	0.121716	0.112021

[truncated: 4 more sheets: Figure 6-figure supplement 1L, Figure 6-figure supplement 1M, Figure 6-figure supplement 1N, Figure 6-figure supplement 1O]
