# Supplementary material for: trim-21 promotes proteasomal degradation of CED-1 for apoptotic cell clearance in C. elegans
Source: eLife journal article supplement (doi:10.7554/elife.76436), 2022-08-05
Supplement: fig7-data1 [file Figure 7-source Data 1.xlsx]

## Sheet: Figure 7E
No. of germ cell corpses(Time post L4)
N2/control RNAi																Mean	SD	SEM	P-Value
12h	0	0	0	0	0	0	0	0	0	0	1	0	0	0	0	0.0666667	0.249444	0.0644061
24h	0	1	0	0	1	0	0	1	0	0	1	0	0	0	2	0.4	0.61101	0.157762
36h	2	4	3	2	1	3	2	1	5	2	3	4	1	3	3	2.6	1.1431	0.295146
48h	4	7	2	6	8	3	2	1	1	5	3	1	4	4	3	3.6	2.09125	0.539959
60h	6	1	5	6	10	4	3	3	6	3	1	5	2	7	3	4.33333	2.35702	0.608581
N2/vha-10 RNAi
12h	0	0	0	1	0	0	1	0	1	0	0	0	0	0	0	0.2	0.4	0.10328	0.298964
24h	0	1	1	3	1	2	2	1	5	1	1	0	1	0	6	1.66667	1.69967	0.438854	0.0139111
36h	3	5	3	3	9	3	8	1	1	0	0	1	3	2	2	2.93333	2.54209	0.656365	0.657979
48h	5	6	4	3	8	11	1	5	6	3	9	9	4	6	7	5.8	2.58715	0.667999	0.019669
60h	0	22	12	8	16	11	9	11	18	12	5	25	1	8	7	11	6.77249	1.74865	0.00166686
trim-21(xwh13)/control RNAi
12h	0	0	1	0	0	0	0	1	0	1	0	0	0	0	0	0.2	0.4	0.10328	0.298964
24h	2	4	2	2	3	5	0	1	0	4	5	0	2	5	2	2.46667	1.74611	0.450843	0.000258844
36h	6	3	4	4	5	5	5	7	2	3	3	2	5	3	1	3.86667	1.58605	0.409516	0.0220505
48h	6	3	6	3	1	6	7	2	4	5	3	3	6	12	4	4.73333	2.56818	0.663102	0.210916
60h	8	6	4	3	3	10	7	4	9	5	5	7	8	4	4	5.8	2.16641	0.559365	0.0975462
trim-21(xwh13)/vha-10 RNAi
12h	1	0	0	0	0	0	0	1	0	0	0	0	0	0	0	0.133333	0.339935	0.0877707	0.55886	0.638337	0.638337
24h	3	3	4	0	1	2	2	2	3	1	2	0	3	4	2	2.13333	1.2037	0.310793	4.73345e-05	0.408922	0.561186
36h	9	4	5	1	3	9	3	8	5	2	5	5	5	4	3	4.73333	2.29395	0.592296	0.00422437	0.0591717	0.254743
48h	13	11	6	3	6	9	4	9	1	7	8	2	5	5	5	6.26667	3.19305	0.824441	0.0142392	0.674169	0.172465
60h	5	7	10	6	14	2	7	12	5	3	5	18	12	4	5	7.66667	4.39191	1.13399	0.018456	0.133542	0.164861

## Sheet: Figure 7F
		No. of germ cell corpses
	Duration of cell corpse(min)	N2/control RNAi	N2/vha-10 RNAi
	0-10	0	0
	11-20	5	0
	21-30	10	1
	31-40	8	0
	41-50	5	0
	51-60	2	0
	61-70	0	3
	71-80	0	2
	81-90	0	3
	91-100	0	0
	>100	0	21

## Sheet: Figure 7G
germ cell corpses labeled by phagosomal markers
N2/control RNAi				Mean	SD	SEM	P-Value
CED-1::GFP	98	99	97	98	0.816497	0.471405
GFP::RAB-5	93	96	98	95.6667	2.0548	1.18634
GFP::RAB-7	97	97	98	97.3333	0.471405	0.272166
LAAT-1::mCHERRY	81	80	79	80	0.816497	0.471405
NUC-1::mCHERRY	78	76	79	77.6667	1.24722	0.720082
CPL-1::mChOint	80	81	84	81.6667	1.69967	0.981307
N2/vha-10 RNAi
CED-1::GFP	95	96	98	96.3333	1.24722	0.720082	0.189004
GFP::RAB-5	96	95	95	95.3333	0.471405	0.272166	0.834019
GFP::RAB-7	99	100	96	98.3333	1.69967	0.981307	0.467605
LAAT-1::GFP	61	59	55	58.3333	2.49444	1.44016	0.000307802
NUC-1::mCHERRY	61	61	59	60.3333	0.942809	0.544331	9.66576e-05
CPL-1::mChOint	66	66	64	65.3333	0.942809	0.544331	0.000287103

## Sheet: Figure 7H
AO staining labeled
	N2/control RNAi	N2/vha-10 RNAi
1st	67	17
2nd	65	37
3rd	72	26
Mean	68	26.6667
SD		8.17856
SEM		4.7219
P-Value		0.00254663

## Sheet: Figure 7I
No. of somatic cell corpses(Developmental Stages)
N2																Mean	SD	SEM	P-Value
comma	11	11	12	9	12	11	9	10	12	9	11	9	11	10	7	10.2667	1.38884	0.358598
1.5 fold	13	8	11	13	12	12	13	12	11	12	12	11	13	11	14	11.8667	1.35974	0.351083
2 fold	10	9	10	13	14	11	16	11	13	16	11	10	15	11	12	12.1333	2.18683	0.564637
2.5 fold	4	5	4	6	9	4	8	6	8	5	6	9	4	5	8	6.06667	1.80616	0.466349
3 fold	1	4	4	6	3	3	0	3	1	2	4	2	2	1	1	2.46667	1.54344	0.398516
4 fold	0	0	1	1	1	0	1	2	1	0	0	1	1	0	1	0.666667	0.596285	0.15396
trim-21(xwh13)
comma	14	15	10	13	12	12	11	14	8	10	12	10	11	10	13	11.6667	1.84992	0.477649	0.0314788
1.5 fold	16	9	10	14	12	17	20	9	18	13	17	15	11	15	13	13.9333	3.23454	0.835154	0.0359235
2 fold	17	16	16	13	12	13	15	15	12	11	15	17	13	16	12	14.2	1.93907	0.500666	0.0132192
2.5 fold	10	8	7	8	8	3	6	6	7	6	7	8	9	8	5	7.06667	1.65193	0.426528	0.137569
3 fold	4	4	5	1	6	1	3	1	4	2	3	3	4	5	2	3.2	1.51438	0.39101	0.214902
4 fold	0	0	0	1	1	1	0	0	1	0	0	1	0	2	1	0.533333	0.618241	0.159629	0.566009
Pced-1vha-10::mcherry line1/trim-21(xwh13)
comma	11	12	8	9	7	12	11	10	7	8	6	6	7	13	10	9.13333	2.24697	0.580166	0.119643
1.5 fold	13	12	14	13	9	10	12	10	12	15	13	11	12	13	9	11.8667	1.7075	0.440875	1
2 fold	11	9	12	14	11	12	8	9	11	13	14	17	9	12	10	11.4667	2.30555	0.59529	0.439056
2.5 fold	4	5	6	7	6	7	10	7	7	6	7	5	5	4	6	6.13333	1.45449	0.375549	0.915108
3 fold	2	3	3	2	0	4	2	3	3	4	1	2	2	3	3	2.46667	1.02415	0.264435	1
4 fold	1	2	0	0	0	0	1	2	0	0	0	0	0	0	0	0.4	0.711805	0.183787	0.291753
Pced-1vha-10::mcherry line2/trim-21(xwh13)
comma	9	10	13	9	8	8	10	5	12	7	7	8	7	11	13	9.13333	2.27645	0.587777	0.123018
1.5 fold	12	12	15	10	10	16	12	10	9	11	9	13	14	11	12	11.7333	2.0155	0.520399	0.838904
2 fold	13	14	12	14	9	9	14	12	9	9	16	9	11	10	18	11.9333	2.76807	0.714713	0.833541
2.5 fold	4	3	4	5	6	7	6	4	5	5	7	6	5	3	6	5.06667	1.23648	0.319258	0.0984378
3 fold	1	3	4	2	1	4	4	3	1	2	3	3	2	1	1	2.33333	1.13529	0.293131	0.796478
4 fold	1	0	0	0	1	0	0	1	0	1	0	0	0	0	0	0.266667	0.442217	0.11418	0.0534792
Pced-1vha-10::mcherry line3/trim-21(xwh13)
comma	7	10	12	8	9	10	14	10	8	9	10	8	9	9	6	9.26667	1.87853	0.485035	0.120466
1.5 fold	11	9	9	13	9	10	11	13	15	11	12	15	15	12	13	11.8667	2.06128	0.532221	1
2 fold	9	8	14	11	13	9	10	10	9	11	10	11	14	11	10	10.6667	1.73845	0.448867	0.0594825
2.5 fold	6	4	7	5	2	5	5	3	3	4	4	6	7	4	5	4.66667	1.39841	0.361068	0.0295498
3 fold	1	3	3	4	1	1	3	3	2	2	3	3	4	2	1	2.4	1.0198	0.263312	0.893703
4 fold	0	0	2	0	0	1	0	0	0	0	1	0	0	0	0	0.266667	0.573488	0.148074	0.0811903

## Sheet: Figure 7J
	AO staining labeled
		N2	trim-21	trim-21; Pced-1vha-10::mcherry line1	trim-21; Pced-1vha-10::mcherry line2	trim-21; Pced-1vha-10::mcherry line3
	1st	70	50	58.59	66.98	68.14
	2nd	65	42	62.96	72.41	62.32
	3rd	70	41.6	65.05	69.74	57.29
	Mean	68.3333	44.5333	62.2	69.71	62.5833
	SD		3.86896	2.69148	2.21689	4.43341
	SEM		2.23375	1.55393	1.27992	2.55963
	P-Value		0.00175231	0.0724139	0.579825	0.180645
