# Supplementary material for: trim-21 promotes proteasomal degradation of CED-1 for apoptotic cell clearance in C. elegans
Source: eLife journal article supplement (doi:10.7554/elife.76436), 2022-08-05
Supplement: fig7-figsupp1-data1 [file Figure 7-figure supplement 1-Source Data 1.xlsx]

## Sheet: Figure 7-figure supplement 1A
	CED-1 recycling time (min)
	WT	trim-21
1st	7.88	8.23
2nd	6.47	7.72
3rd	8.77	8.77
4th	9.65	9.12
5th	8.68	7.73
Mean	8.29	8.314
SD	1.06889	0.558305
SEM	0.478021	0.249681
P-Value		0.969225
