# Supplementary material for: trim-21 promotes proteasomal degradation of CED-1 for apoptotic cell clearance in C. elegans
Source: eLife journal article supplement (doi:10.7554/elife.76436), 2022-08-05
Supplement: fig7-figsupp2-data1 [file Figure 7-figure supplement 2-Source Data 1.xlsx]

## Sheet: Figure 7-figure supplement 2B
		Percentage of VHA-10::mCherry to CED-1::GFP fluorescence (%)
		CED-1::GFP; VHA-10::mCherry
		N2	trim-21	snx-1
	1st	41.27	72.22	85.71
	2nd	46.99	72.45	83.72
	3rd	51.59	76.27	90.63
	Mean	46.6167	73.6467	86.6867
	SD	4.22138	1.85735	2.9043
	SEM	1.88786	0.830633	1.29884
	P-Value		0.00115671	0.000380129

## Sheet: Figure 7-figure supplement 2C
				Percentage of CED-1::GFP to VHA-10::mCherry fluorescence (%)
				CED-1::GFP; VHA-10::mCherry
				N2	trim-21	snx-1
			1st	43.53	68.42	82.9
			2nd	46.15	73.96	88.46
			3rd	42.22	64.29	85.34
			Mean	43.9667	68.89	85.5667
			SD	1.63386	3.96173	2.27551
			SEM	0.730683	1.77174	1.01764
			P-Value		0.00119126	3.03835e-05

## Sheet: Figure 7-figure supplement 2F
		The interactive intensity of CED-1 and VHA-10
		ha::vha-10
		N2	trim-21	snx-1
CED-1/VHA-10	1st	1	2.61638	0.786882
CED-1/VHA-10	2nd	1	2.12922	1.24308
CED-1/VHA-10	3rd	1	3.09754	0.752357
	Mean	1	2.61438	0.927438
	SD		0.395317	0.223634
	SEM		0.176791	0.100012
	P-Value		0.00446348	0.670157
