# Supplementary material for: trim-21 promotes proteasomal degradation of CED-1 for apoptotic cell clearance in C. elegans
Source: eLife journal article supplement (doi:10.7554/elife.76436), 2022-08-05
Supplement: table3-data1 [file Table 3-Source Data 1.xlsx]

## Sheet: Sheet1
N2																P-Value	Mean	SD	SEM
comma	10	9	9	14	9	10	10	9	10	12	8	12	6	9	9		9.73333	1.80616	0.466349
1.5 fold	14	13	10	14	10	10	15	11	13	14	13	11	14	9	13		12.2667	1.8427	0.475784
2 fold	12	9	13	12	8	13	12	13	12	10	10	11	11	12	13		11.4	1.49666	0.386437
2.5 fold	6	7	7	6	7	5	7	9	6	7	6	6	9	5	7		6.66667	1.13529	0.293131
3 fold	4	0	4	2	5	1	3	1	3	2	3	3	2	3	3		2.6	1.25433	0.323866
4 fold	0	1	1	1	1	0	0	1	0	1	0	1	1	1	1		0.666667	0.471405	0.121716
ced-1(e1735)
comma	24	15	23	24	23	24	22	21	20	17	21	25	27	16	23	1.9275e-12	21.6667	3.29983	0.852013
1.5 fold	27	28	33	28	26	26	32	33	28	24	25	27	30	31	34	1.69877e-16	28.8	3.05941	0.789937
2 fold	39	41	37	30	36	36	29	34	31	37	40	37	30	30	34	7.9437e-19	34.7333	3.82041	0.986426
2.5 fold	30	32	43	30	32	40	29	36	32	36	32	24	39	46	32	6.04428e-17	34.2	5.6	1.44591
3 fold	35	22	28	33	22	29	30	46	35	22	28	33	29	30	46	9.09598e-15	31.2	7.11993	1.83836
4 fold	37	31	36	27	24	32	34	30	37	35	24	22	34	28	33	4.85029e-20	30.9333	4.76748	1.23096
Pced-1ced-1 line1/ced-1(e1735)
comma	13	10	8	8	10	10	10	10	8	8	10	12	10	9	10	1	9.73333	1.38884	0.358598
1.5 fold	10	11	12	13	12	12	14	13	12	12	14	13	12	14	13	0.729138	12.4667	1.0873	0.28074
2 fold	8	8	11	11	9	9	9	9	9	7	10	7	9	9	10	5.48581e-05	9	1.1547	0.298142
2.5 fold	8	9	7	10	12	9	7	8	11	9	9	0	5	11	8	0.0667977	8.2	2.78568	0.719259
3 fold	1	7	3	1	2	0	3	0	1	2	3	2	1	2	3	0.344239	2.06667	1.65193	0.426528
4 fold	0	0	0	1	1	3	2	0	4	1	1	0	1	0	0	0.439354	0.933333	1.18134	0.30502
Pced-1ced-1 line2/ced-1(e1735)
comma	10	11	11	10	8	9	10	9	8	12	8	9	8	10	9	0.649284	9.46667	1.2037	0.310793
1.5 fold	14	12	13	9	13	11	12	13	12	12	11	11	11	11	11	0.369718	11.7333	1.18134	0.30502
2 fold	17	13	9	8	12	10	10	15	14	9	8	10	14	8	8	0.645746	11	2.8519	0.736357
2.5 fold	9	5	9	5	7	5	7	6	10	12	8	8	10	7	10	0.0666946	7.86667	2.06128	0.532221
3 fold	1	1	4	2	4	1	1	8	2	3	3	4	1	1	2	0.912167	2.53333	1.85712	0.479506
4 fold	1	1	1	2	1	0	1	1	2	0	1	2	0	1	2	0.0811903	1.06667	0.679869	0.175541
Pced-1ced-1 line3/ced-1(e1735)
comma	13	13	10	11	10	11	12	11	10	11	10	9	9	11	10	0.0939709	10.7333	1.18134	0.30502
1.5 fold	17	17	10	11	10	13	12	10	12	11	12	9	11	11	12	0.610569	11.8667	2.24697	0.580166
2 fold	10	9	10	10	17	10	7	12	8	13	12	11	9	16	17	1	11.4	3.02875	0.78202
2.5 fold	5	6	5	4	8	10	4	9	8	7	6	5	6	5	8	0.640343	6.4	1.78139	0.459952
3 fold	3	2	1	1	1	1	3	0	5	1	0	3	2	1	2	0.0821974	1.73333	1.28927	0.332889
4 fold	0	0	0	0	1	0	1	1	0	0	0	1	4	0	0	0.661529	0.533333	1.02415	0.264435
Pced-1ced-1(N962A) line1/ced-1(e1735)
comma	24	26	22	23	20	26	26	24	23	25	22	23	20	26	24	8.20886e-18	23.6	1.95959	0.505964
1.5 fold	25	28	36	38	29	38	34	32	36	28	32	30	28	34	32	1.72846e-16	32	3.84708	0.993311
2 fold	42	33	36	38	31	33	37	34	36	38	35	34	38	38	33	1.74694e-22	35.7333	2.74388	0.708467
2.5 fold	38	30	36	32	26	33	27	27	39	38	30	31	26	33	27	2.31573e-18	31.5333	4.41009	1.13868
3 fold	19	23	28	40	34	37	34	34	42	23	29	34	28	28	30	4.29991e-16	30.8667	6.20609	1.60241
4 fold	32	32	32	26	40	31	35	34	32	31	24	30	28	24	33	6.66756e-22	30.9333	4.05737	1.04761
Pced-1ced-1(N962A) line2/ced-1(e1735)
comma	23	26	24	26	24	25	20	24	24	25	23	24	22	25	24	1.35887e-19	23.9333	1.48174	0.382584
1.5 fold	30	28	28	40	23	30	26	34	32	28	38	33	28	27	31	1.77172e-14	30.4	4.33282	1.11873
2 fold	27	32	43	40	43	38	36	35	36	36	32	28	40	38	35	1.57425e-17	35.9333	4.59662	1.18684
2.5 fold	30	30	42	39	35	34	35	28	30	30	39	35	34	35	26	1.73895e-19	33.4667	4.30297	1.11102
3 fold	30	25	25	31	26	22	30	25	26	28	32	30	22	30	25	9.91721e-22	27.1333	3.11698	0.8048
4 fold	38	38	28	28	36	30	30	29	29	29	27	22	42	22	36	4.20618e-18	30.9333	5.65057	1.45897
Pced-1ced-1(N962A) line3/ced-1(e1735)
comma	24	26	23	23	23	22	20	22	20	24	22	18	23	24	22	5.25463e-17	22.4	1.89033	0.48808
1.5 fold	31	40	29	42	31	30	33	36	33	35	30	26	30	29	31	4.96636e-16	32.4	4.14407	1.06999
2 fold	35	34	36	42	36	34	28	34	38	26	38	38	35	36	32	7.95261e-19	34.8	3.83319	0.989725
2.5 fold	35	27	32	36	32	34	36	35	35	27	32	34	35	34	32	4.70055e-24	33.0667	2.74388	0.708467
3 fold	31	37	35	34	27	31	37	36	35	25	30	32	28	30	32	1.50777e-22	32	3.54024	0.914087
4 fold	34	32	31	31	32	35	34	31	30	37	27	30	31	32	33	7.25705e-29	32	2.3094	0.596285
Pced-1ced-1(Y965F) line1/ced-1(e1735)
comma	8	10	11	11	10	9	10	10	13	16	18	13	18	16	18	0.00731197	12.7333	3.43447	0.886775
1.5 fold	14	17	14	14	15	16	14	13	22	20	20	17	18	16	20	2.50898e-05	16.6667	2.69979	0.697084
2 fold	10	20	25	26	15	11	9	9	24	17	26	22	19	26	19	0.00026309	18.5333	6.21682	1.60518
2.5 fold	13	15	13	12	16	10	8	14	13	9	10	12	16	15	14	3.71731e-09	12.6667	2.41293	0.623015
3 fold	10	20	25	26	15	11	3	4	10	6	6	8	8	7	6	0.000142882	11	7.03325	1.81598
4 fold	5	5	1	5	5	7	1	1	5	4	1	1	4	2	3	3.08216e-05	3.33333	1.95505	0.504792
Pced-1ced-1(Y965F) line2/ced-1(e1735)
comma	18	13	14	16	13	16	18	13	18	16	18	18	14	14	16	4.48831e-09	15.6667	1.95505	0.504792
1.5 fold	17	16	20	20	22	20	20	17	18	16	20	17	16	17	17	3.37809e-09	18.2	1.86905	0.482586
2 fold	23	20	15	18	24	17	26	22	19	26	19	23	22	19	22	3.69673e-11	21	3.09839	0.8
2.5 fold	15	8	13	10	11	15	12	10	9	11	12	17	8	8	10	2.19602e-06	11.2667	2.67	0.68939
3 fold	8	13	7	8	10	6	6	8	8	7	6	8	11	7	5	5.43593e-09	7.86667	2.02868	0.523804
4 fold	4	2	1	2	5	4	1	1	4	2	3	4	2	4	2	4.93452e-06	2.73333	1.28927	0.332889
Pced-1ced-1(Y965F) line3/ced-1(e1735)
comma	18	10	11	11	10	13	10	9	13	12	15	12	10	18	9	0.0143833	12.0667	2.81583	0.727044
1.5 fold	14	17	14	14	15	16	16	14	18	13	12	14	13	15	20	0.00086868	15	2.03306	0.524934
2 fold	10	20	25	26	15	11	22	15	26	9	13	23	14	10	20	0.00132892	17.2667	5.97179	1.54191
2.5 fold	10	11	8	9	12	15	14	12	11	10	13	9	14	12	10	2.635e-08	11.3333	1.98886	0.513521
3 fold	10	20	25	26	15	11	22	15	26	9	13	23	14	10	20	9.48807e-10	17.2667	5.97179	1.54191
4 fold	5	5	1	5	5	7	2	1	1	4	3	2	2	2	4	1.55539e-05	3.26667	1.80616	0.466349
Pced-1ced-1(Y1019F) line1/ced-1(e1735)
comma	17	15	20	14	17	15	16	14	15	15	15	14	24	17	19	1.51459e-08	16.4667	2.65497	0.685511
1.5 fold	26	16	20	20	23	22	19	17	17	17	17	19	17	20	17	1.49756e-08	19.1333	2.70473	0.698358
2 fold	16	24	21	19	20	21	21	24	21	18	18	19	17	23	22	1.8048e-12	20.2667	2.35136	0.607118
2.5 fold	13	12	10	9	10	12	15	17	8	11	10	12	15	14	10	7.45715e-08	11.8667	2.44586	0.631518
3 fold	8	4	10	10	12	19	10	11	8	9	5	14	10	12	9	2.52971e-08	10.0667	3.43447	0.886775
4 fold	2	0	3	2	4	3	2	2	4	4	3	3	6	4	4	7.73364e-07	3.06667	1.33998	0.345982
Pced-1ced-1(Y1019F) line2/ced-1(e1735)
comma	11	14	12	17	17	16	16	16	16	16	14	15	15	15	16	7.09709e-09	15.0667	1.65193	0.426528
1.5 fold	14	13	16	18	17	19	16	17	20	17	19	18	15	14	16	1.69879e-06	16.6	1.95959	0.505964
2 fold	18	19	16	14	17	22	19	18	16	19	21	19	18	15	16	4.94048e-10	17.8	2.10396	0.543241
2.5 fold	10	12	15	14	10	12	16	13	9	10	11	11	15	11	13	1.93108e-09	12.1333	2.06128	0.532221
3 fold	3	4	6	9	4	10	4	4	5	8	8	5	3	5	5	0.000125205	5.53333	2.12498	0.548668
4 fold	4	2	1	1	2	2	3	2	2	2	2	2	3	1	3	2.53043e-06	2.13333	0.805536	0.207989
Pced-1ced-1(Y1019F) line3/ced-1(e1735)
comma	12	15	13	15	14	15	15	13	15	16	15	16	14	13	14	8.74172e-09	14.3333	1.13529	0.293131
1.5 fold	21	19	21	24	23	19	19	20	18	17	18	21	19	18	19	2.52588e-11	19.7333	1.87853	0.485035
2 fold	21	16	26	17	20	23	24	26	19	22	19	19	18	21	17	8.56265e-11	20.5333	3.05214	0.788059
2.5 fold	12	12	13	12	10	15	10	9	11	11	15	16	10	9	9	4.46871e-08	11.6	2.2151	0.571936
3 fold	8	7	10	13	8	9	7	6	8	10	9	8	6	8	6	2.55213e-10	8.2	1.79629	0.463801
4 fold	2	0	2	3	4	6	5	1	3	3	4	3	3	3	3	2.69347e-06	3	1.41421	0.365148
