# Supplementary material for: trim-21 promotes proteasomal degradation of CED-1 for apoptotic cell clearance in C. elegans
Source: eLife journal article supplement (doi:10.7554/elife.76436), 2022-08-05
Supplement: table4-data1 [file Table 4-Source Data 1.xlsx]

## Sheet: Sheet1
No. of germ cell corpses(Time 48h post L4)
control RNAi	F49B2.5	Y47G6A.5	Y48G1C.10	C35E7.10	F22D6.1	F23C8.7	F26E4.5	F53G12.6	F59A3.8	T21G5.1	ZC581.7	W04G5.6	C34F11.5	F46F5.2	M176.9	R05H5.4	Y62F5A.10	ZK622.1	C08H9.5	C08H9.8	M176.6	M176.7	R09D1.12	R09D1.13	ZK938.5	B0252.1	C01G6.8	M03A1.1	B0523.1	F57B9.8	W03A5.1	C15H7.3	T17A3.8	R151.1	C01C7.1	C18H7.4	C25A8.5	C55C3.4	F01D4.3	F22B3.8	K07F5.4	K09B11.5	R11E3.1	T04B2.2	T06C10.3	T06C10.6	T13H10.1	T25B9.4	W01B6.5
0	2	3	4	6	1	8	3	2	4	1	1	2	4	1	3	1	1	2	2	2	4	1	9	3	1	1	2	4	5	5	2	3	3	3	4	5	2	2	6	20	5	7	4	6	3	3	2	5	0
3	2	3	2	8	0	4	0	4	3	0	1	1	2	3	1	5	2	9	4	9	2	1	3	0	5	0	1	1	5	2	3	6	3	2	0	2	4	2	6	12	2	3	4	8	3	3	3	5	0
3	2	3	2	4	0	4	0	4	3	0	0	0	3	0	1	1	1	2	2	7	2	1	2	3	3	1	6	3	5	2	3	4	9	5	0	5	5	2	4	6	2	9	2	2	4	1	1	7	0
1	3	3	2	8	0	0	4	5	3	1	1	4	4	0	1	2	2	3	8	6	4	1	9	3	7	0	2	2	3	1	4	2	4	4	0	7	1	5	5	18	7	6	2	2	2	0	5	5	2
2	6	3	2	1	3	2	2	4	5	3	2	4	3	3	4	2	1	3	1	5	6	3	8	2	3	0	1	3	4	0	2	3	5	1	1	10	2	4	3	11	6	6	3	7	0	0	5	5	4
3	5	3	4	2	2	3	0	4	7	1	0	3	3	0	0	4	2	3	2	4	2	2	4	3	3	4	3	6	5	1	2	3	7	2	1	4	3	5	0	9	6	7	5	5	2	5	5	1	2
2	3	5	2	5	2	0	2	4	1	2	0	0	2	2	2	3	0	3	6	6	6	1	4	2	5	1	2	3	3	1	0	3	5	2	3	9	5	2	3	5	4	6	6	2	2	1	3	3	3
4	2	3	4	4	2	0	3	3	2	7	3	2	2	3	1	3	3	6	2	2	3	0	6	0	7	0	2	5	9	0	4	4	6	5	3	2	2	3	3	8	2	4	4	6	4	1	3	2	0
3	5	5	4	4	1	0	4	2	1	2	2	3	2	2	1	4	3	2	3	2	2	4	3	5	2	3	4	3	3	0	2	3	3	4	3	11	4	1	3	12	4	2	2	5	2	0	6	4	2
2	4	6	7	5	6	2	5	6	0	2	1	2	1	2	3	3	0	3	1	3	4	0	2	1	6	1	3	2	2	0	3	1	6	5	7	6	4	5	4	7	4	4	7	5	1	0	4	3	2
3	4	7	2	3	4	2	1	3	0	1	3	2	2	2	1	2	3	1	5	3	2	2	6	2	14	3	5	4	3	1	3	3	2	4	1	2	4	2	3	8	0	11	4	7	2	4	6	2	1
3	4	1	5	3	6	0	2	2	0	2	1	3	1	0	0	6	4	5	4	7	6	2	11	3	6	1	4	1	5	2	3	4	2	1	3	2	1	1	3	10	7	3	3	8	4	4	2	5	3
4	6	3	3	2	4	5	2	1	3	2	2	4	2	2	1	4	2	4	9	7	4	2	3	2	8	1	2	2	4	2	4	8	4	2	2	2	0	3	2	7	7	6	0	6	5	1	3	4	3
4	5	1	3	1	1	1	2	2	2	3	2	3	2	3	0	5	3	9	4	3	3	1	1	3	4	3	4	3	4	3	5	2	3	3	4	5	9	3	1	6	0	5	0	8	4	3	2	4	2
3	2	4	6	0	1	2	2	2	1	2	3	3	2	3	2	3	3	5	8	2	6	4	0	4	4	0	4	3	4	2	3	2	7	3	4	7	1	10	3	6	3	2	2	8	2	4	4	3	2
3	3	2	4	2	3	1	2	3	0		2					3			7	2	10	1	0	3	7	3	4	3	3	3	3	3	6	2	3	10	0	1	3	8	0	3	0	9	0	7	5	3	2
3	8	3	3	1	7	4	2	4	5		2					6			5	2	5	0	1		7	1						3	4	5		4	3	1	2	17	2	2	1	14	4	2	4	7
2	5	3	3	0			4	1	2							5			5	3	5	3	1		6	2						2	4	4		9	2	3	0	9	0	4	2	6	2	2	5	3
	10	3	0	4			4	3	7							4			7	5	4	1	1		14	5						5	7	1		2	2	1	3	13	1	2	3	9	3	8	2	8
	6	3	0	1			3	3	4							5			6	3	4		3		6	2						2	2	2		11	0	1	3	0	4	5	0	8		3	4	4
	5	5	0	2			1	1	2							3			5	0	3		2		8	4						4	2	2		6			6	4	7	5	2	4		2	4	3
	4	3	4					8								4			7	2	9		2		4	7						4	0	5		2			8	9	6	4	3	3		1	6	8
	5	4	3					8								5			12	3	6		5		4	1						9		4		2			5	9	6	6	0	5		2	8	8
	5	2	3					5								5			4		9		5		7	3						5		5		4			6	6	4	6		7			6	5
	7	3	2					6								5			8		4		5		4	4						7		4		7			7	5	2	12		6			5	7
	10	6	2					5								5			5		8		6		3							9		1		2			5	3	3	4		6			6	5
	5	3	2					5								7			5		5		6		6							7		2		5			7	10	8	4		5			8
	5	9	4					6								5			9				4		5							6		3		2			6	4	3	4		4			5
	3	6	2					6								4			6				5		4							5		4		4			6		7	4		9			7
	6	4	3					4								4			4				5		5							5				7			6		3	6		5			5
	2	4	0					1								5			12				3		5							4				9			7		6	4		5			5
	2	2						0								5			5				2		5							2				7			5		2	6		7			6
	3	5						2								7			4						4							3				5					3	6		5			8
	6	4						2								5			3													5				4					4	6		5			5
	5															5			2													4				5					4	5		5			7
	3															7			4													2				4					4	9		3			6
	2															15			8													7				4					6	8		3			5
																6			4													3				5					6	7					7
																6			5													11				4					4	6					5
																6			8													4				5					4	4					3
																13																4				3						6					8
																																				4						6
																																				4						6
																																										5
																																										9
																																										8
																																										7
[truncated: 41 more columns]
