# Supplementary material for: trim-21 promotes proteasomal degradation of CED-1 for apoptotic cell clearance in C. elegans
Source: eLife journal article supplement (doi:10.7554/elife.76436), 2022-08-05
Supplement: table5-data1 [file Table 5-Source Data 1.xlsx]

## Sheet: Sheet1
	1st
	control	chin-1	shc-1	csk-1	F39B2.5	sli-1	sem-5	rin-1	F13B12.6	vav-1	gap-3	nck-1	tns-1	C18A11.4	Y43C5B.2	K11E4.2	plc-3	sta-2	Y116A8C.38	soem-1	Y52D5A.2	sta-1	aap-1	shc-2	Y37D8A.4	emb-5	ptp-1
	2	4	4	1	4	4	7	1	0	4	13	12	10	6	5	4	1	3	3	4	7	7	4	3	6		23
	6	3	5	3	7	0	8	10	0	9	11	4	6	8	7	4	3	7	3	8	6	4	0	6	12		9
	3	6	4	5	7	3	13	4	5	8	3	13	3	5	5	8	3	4	6	3	5	6	7	3	2		6
	4	10	3	3	4	4	8	9	3	4	4	6	3	4	1	12	2	1	4	4	5	5	2	4	12		12
	5	8	5	8	6	5	7	8	4	3	6	6	3	5	10	2	4	6	2	4	2	7	2	6	3		10
	5	10	8	2	1	4	8	6	1	5	7	8	2	3	4	2	3	5	2	8	4	5	6	3	6		9
	3	7	5	5	5	5	7	8	1	3	10	7	1	6	4	7	5	1	3	5	1	4	6	7	6		7
	2	6	2	4	2	4	8	2	3	2	6	9	3	4	5	2	3	3	4	7	5	5	3	6	4		9
	3	5	8	4	5	1	8	5	5	1	4	6	2	5	3	9	1	3	3	6	8	3	5	4	5		9
	4	4	6	12	5	2	11	5	3	4	1	5	6	3	6	5	3	1	5	7	6	7	0	5	7		6
	7	1	9	6	2	8	6	2	3	9	8	3	7	19	6	4	2	6	1	6	5	12	1	1	5		10
	8	5	3	4	6	2	2	2	1	5	5	5	10	8	15	7	1	5	2	6	1	6	4	4	3		11
	4	6	3	9	3	5	2	1	4	2	3	4	8	5	5	1	3	6	1	4	10	6	2	9	7		5
	3	4	6	4	2	11	11	4	3	4	9	10	12	4	6	2	5	2	6	3	9	2	4	2	9		7
	5	4	3	6	2	6	20	10	1	8	3	4	7	8	6	6	1	4	7	5	5	4	6	7	2		10
P-Value		0.116825	0.35579	0.361039	0.771706	1	0.00193403	0.368338	0.00774848	0.569248	0.0617888	0.00905279	0.212146	0.0916878	0.100777	0.436142	0.00901842	0.503006	0.233568	0.099414	0.230659	0.103098	0.288207	0.581895	0.08412		0.000120736
Mean	4.26667	5.53333	4.93333	5.06667	4.06667	4.26667	8.4	5.13333	2.46667	4.73333	6.2	6.8	5.53333	6.2	5.86667	5	2.66667	3.8	3.46667	5.33333	5.26667	5.53333	3.46667	4.66667	5.93333		9.53333
SD	1.69181	2.39072	2.04831	2.74388	1.91369	2.64491	4.19206	3.11698	1.62754	2.51573	3.31059	2.92575	3.30387	3.78065	3.09552	3.03315	1.29957	1.93907	1.78388	1.61933	2.54209	2.24697	2.18683	2.087	3.04339		4.0803
SEM	0.436824	0.617282	0.52887	0.708467	0.494113	0.682913	1.08238	0.8048	0.420229	0.649558	0.85479	0.755425	0.853056	0.97616	0.799259	0.783156	0.335548	0.500666	0.460595	0.418109	0.656365	0.580166	0.564637	0.53886	0.7858		1.05353
	2nd
	control	chin-1	shc-1	csk-1	F39B2.5	sli-1	sem-5	rin-1	F13B12.6	vav-1	gap-3	nck-1	tns-1	C18A11.4	Y43C5B.2	K11E4.2	plc-3	sta-2	Y116A8C.38	soem-1	Y52D5A.2	sta-1	aap-1	shc-2	Y37D8A.4	emb-5	ptp-1
	4	10	5	8	3	5		4		10	3	4		6	1	4	3	5	9	3	2	8	4	3	12		5
	4	9	4	3	4	11		10		10	9	5		5	3	8	1	9	2	5	3	4	4	6	8		6
	2	6	3	6	8	11		5		6	2	9		3	9	4	1	4	3	3	3	4	1	1	5		19
	4	5	10	14	5	4		4		8	4	3		5	2	5	2	3	5	7	9	3	3	4	2		8
	3	2	2	4	7	5		4		8	2	6		3	5	3	3	2	7	6	12	7	1	4	11		6
	8	8	4	7	3	8		4		8	6	8		3	3	5	0	2	2	1	1	11	3	4	4		10
	5	5	3	9	9	6		3		7	6	10		7	10	4	3	7	4	2	4	8	3	4	5		7
	2	9	9	8	3	4		2		13	5	13		4	4	5	2	6	2	2	7	5	1	7	6		7
	6	4	7	4	7	4		10		6	8	17		4	5	5	1	31	3	6	3	4	5	3	3		7
	4	11	6	3	15	4		7		9	6	2		7	8	2	1	31	3	1	4	6	4	6	2		5
	1	5	2	11	7	9		8		5	4	4		1	2	4	3	28	4	2	4	7	3	5	5		4
	2	6	8	5	5	2		6		5	7	4		4	3	5	2	6	5	4	4	1	4	3	6		5
	2	8	3	8	5	9		7		8	10	7		3	5	3	2	5	3	1	5	3	5	6	1		9
	3	10	3	6	2	1		3		7	6	4		3	3	4	0	4	5	3	9	7	3	1	3		5
	2	11	5	4	4	4		3		5	6	9		3	2	1	8	2	9	3	4	3	7	2	5		6
P-Value		0.000132221	0.0818549	0.00190339	0.0231746	0.0183187		0.02951		5.03989e-06	0.0100438	0.00508996		0.358302	0.315611	0.299342	0.0628491	0.0356694	0.233432	0.774812	0.119014	0.0266316	0.917453	0.49275	0.0762244		0.00118237
Mean	3.46667	7.26667	4.93333	6.66667	5.8	5.8		5.33333		7.66667	5.6	7		4.06667	4.33333	4.13333	2.13333	9.66667	4.4	3.26667	4.93333	5.4	3.4	3.93333	5.2		7.26667
SD	1.78388	2.67	2.46216	3.0037	3.16649	2.99333		2.46757		2.14994	2.2745	3.96653		1.61107	2.62467	1.54344	1.85712	10.358	2.24499	1.87853	2.90899	2.52455	1.58325	1.76887	3.03754		3.51125
SEM	0.460595	0.68939	0.635726	0.775552	0.817585	0.772873		0.637123		0.555111	0.587272	1.02415		0.415977	0.677687	0.398516	0.479506	2.67443	0.579655	0.485035	0.751098	0.651835	0.408792	0.456719	0.78429		0.906601
	3rd
	control	chin-1	shc-1	csk-1	F39B2.5	sli-1	sem-5	rin-1	F13B12.6	vav-1	gap-3	nck-1	tns-1	C18A11.4	Y43C5B.2	K11E4.2	plc-3	sta-2	Y116A8C.38	soem-1	Y52D5A.2	sta-1	aap-1	shc-2	Y37D8A.4	emb-5	ptp-1
	1	8	10	3	10	11		4		6	2	4	2	8	0	3	3	4	2	9	5	5	1	5	6		0
	3	3	5	36	4	3		2		6	7	6	6	4	6	6	1	10	3	6	4	8	0	3	1		6
	5	2	5	4	6	2		10		3	11	9	3	4	5	4	1	1	8	5	4	1	3	5	2		6
	1	3	5	7	8	7		7		1	9	6	4	4	2	6	2	5	4	6	4	2	6	6	1		2
	3	4	7	4	12	7		7		4	4	6	11	7	1	3	3	7	5	4	6	6	7	4	3		3
	6	4	2	4	2	6		3		4	7	9	3	7	1	2	0	8	9	6	4	1	6	10	6		2
	3	2	6	8	8	3		6		3	6	6	4	16	0	8	3	7	5	9	1	7	5	3	7		6
	1	2	7	2	3	4		4		2	2	8	2	12	4	2	2	8	5	9	6	2	3	5	3		2
	4	4	6	3	5	1		2		4	3	7	9	7	4	7	1	8	6	2	9	7	9	12	3		5
	1	11	4	7	6	5		3		3	7	7	3	3	5	1	1	9	1	5	6	5	7	5	4		2
	4	4	12	5	4	8		14		3	5	6	10	6	2	7	3	11	4	8	5	2	3	4	7		3
	2	5	1	4	8	4		5		6	1	7	4	3	4	4	2	14	2	6	3	2	2	5	3		9
	4	5	3	4	4	5		3		4	5	7	8	5	13	2	2	1	3	2	2	6	8	5	8		3
	2	6	2		4	4		10		6	8	6	5	6	12	2	0	9	3	5	7	3	2	3	7		2
	9	8	5		2	2		10		7	1	4	3	12	4	3	8	8	3	2	1	7	8	5	10		4
P-Value		0.105951	0.0385464	0.127268	0.0149182	0.096888		0.0185306		0.24255	0.0559252	5.26211e-05	0.0614002	0.00293352	0.423547	0.374966	0.146072	0.000683364	0.258199	0.0106275	0.148056	0.255551	0.144102	0.0235118	0.118204		0.633132
Mean	3.26667	4.73333	5.33333	7	5.73333	4.8		6		4.13333	5.2	6.53333	5.13333	6.93333	4.2	4	2.13333	7.33333	4.2	5.6	4.46667	4.26667	4.66667	5.33333	4.73333		3.66667
SD	2.14372	2.48909	2.8441	8.5395	2.83941	2.56125		3.48329		1.668	2.92575	1.40791	2.87209	3.62338	3.72738	2.16025	1.85712	3.35989	2.13542	2.36079	2.12498	2.4074	2.74874	2.41293	2.64491		2.24103
SEM	0.553507	0.64268	0.734343	2.20489	0.733131	0.661312		0.899383		0.430676	0.755425	0.363522	0.74157	0.935553	0.962404	0.557773	0.479506	0.867521	0.551362	0.609554	0.548668	0.621587	0.709721	0.623015	0.682913		0.578632
