# Supplementary material for: trim-21 promotes proteasomal degradation of CED-1 for apoptotic cell clearance in C. elegans
Source: eLife journal article supplement (doi:10.7554/elife.76436), 2022-08-05
Supplement: table6-data1 [file Table 6-Source Data 1.xlsx]

## Sheet: protein
Protein IDs	Protein names	Gene names	Fasta headers	Number of proteins	Peptides	Unique peptides	Sequence coverage [%]	Mol. weight [kDa]	Sequence length	Sequence coverage R1528-HSP [%]	Sequence coverage R1528-HSP-FLAG [%]	LFQ intensity R1528-HSP	LFQ intensity R1528-HSP-FLAG
A0A486WXP6;G5EEF0;A0A486WVH0;A0A486WUR9;H2FLL0;H2FLK8;H2FLL1;G5EDH9;H2FLK6;A0A486WTP6;H2FLK9;H2FLK7;A0A486WWP8;A0A486WVD1;G5EFU3;H2FLK4;H2FLK3;H2FLK5;F5GUH5;G5EGB8;G5EBW6	CAEEL Plant Late Embryo Abundant (LEA) related	lea-1	tr|A0A486WXP6|A0A486WXP6_CAEEL Plant Late Embryo Abundant (LEA) related OS=Caenorhabditis elegans OX=6239 GN=lea-1 PE=1 SV=1;tr|G5EEF0|G5EEF0_CAEEL Plant Late Embryo Abundant (LEA) related OS=Caenorhabditis elegans OX=6239 GN=lea-1 PE=1 SV=1;tr|A0A486WVH0|	21	18	18	16.3	131.57	1250	15.5	11.8	541870000	1885700000
P05690;P55155	CAEEL Vitellogenin-2	vit-2	sp|P05690|VIT2_CAEEL Vitellogenin-2 OS=Caenorhabditis elegans OX=6239 GN=vit-2 PE=1 SV=5;sp|P55155|VIT1_CAEEL Vitellogenin-1 OS=Caenorhabditis elegans OX=6239 GN=vit-1 PE=1 SV=2	2	11	11	6.3	187.72	1613	6.3	3.2	2593200000	1429200000
P18948	CAEEL Vitellogenin-6	vit-6	sp|P18948|VIT6_CAEEL Vitellogenin-6 OS=Caenorhabditis elegans OX=6239 GN=vit-6 PE=1 SV=5	1	10	10	6.1	193.32	1651	6.1	1.3	825600000	76000000
Q18100;Q53U86;Q4PIU9;Q53U87;W6RTH3;W6RRX6	CAEEL Fibronectin type-III domain-containing protein	sax-7	tr|Q18100|Q18100_CAEEL Fibronectin type-III domain-containing protein OS=Caenorhabditis elegans OX=6239 GN=sax-7 PE=1 SV=3;tr|Q53U86|Q53U86_CAEEL Fibronectin type-III domain-containing protein OS=Caenorhabditis elegans OX=6239 GN=sax-7 PE=1 SV=1;tr|Q4PIU9|	6	9	9	8.3	127.62	1144	8.3	1.6	807770000	246200000
U4PMD6;Q8MXS0;Q95XP6;B7CED8;Q95XP5;O76832;Q9TYP9;O76833;F5GU98;G5EC39;G5EC04;G5EFR6	CAEEL Calcium-transporting ATPase	mca-3	tr|U4PMD6|U4PMD6_CAEEL Calcium-transporting ATPase OS=Caenorhabditis elegans OX=6239 GN=mca-3 PE=1 SV=1;tr|Q8MXS0|Q8MXS0_CAEEL Calcium-transporting ATPase OS=Caenorhabditis elegans OX=6239 GN=mca-3 PE=1 SV=1;tr|Q95XP6|Q95XP6_CAEEL Calcium-transporting ATPa	12	8	8	8.4	111.82	1027	8.4	0	188750000	0
Q18688	CAEEL Heat shock protein 90	daf-21	sp|Q18688|HSP90_CAEEL Heat shock protein 90 OS=Caenorhabditis elegans OX=6239 GN=daf-21 PE=1 SV=1	1	9	8	13	80.282	702	11.1	6	724300000	89317000
P02566	CAEEL Myosin-4	unc-54	sp|P02566|MYO4_CAEEL Myosin-4 OS=Caenorhabditis elegans OX=6239 GN=unc-54 PE=1 SV=2	1	7	7	4.2	224.75	1963	4.2	0.5	110590000	35591000
P29691	CAEEL Elongation factor 2	eef-2	sp|P29691|EF2_CAEEL Elongation factor 2 OS=Caenorhabditis elegans OX=6239 GN=eef-2 PE=1 SV=4	1	7	7	8.7	94.795	852	8.7	1.2	362820000	11460000
P90735;Q27461;G5EFV6	CAEEL Sodium/potassium-transporting ATPase subunit alpha	eat-6	tr|P90735|P90735_CAEEL Sodium/potassium-transporting ATPase subunit alpha OS=Caenorhabditis elegans OX=6239 GN=eat-6 PE=1 SV=1;tr|Q27461|Q27461_CAEEL Sodium/potassium-transporting ATPase subunit alpha OS=Caenorhabditis elegans OX=6239 GN=eat-6 PE=3 SV=1	3	7	7	7.4	111	996	7.4	1.9	360650000	103240000
G5ED07	CAEEL Protein disulfide-isomerase	pdi-3	tr|G5ED07|G5ED07_CAEEL Protein disulfide-isomerase OS=Caenorhabditis elegans OX=6239 GN=pdi-3 PE=1 SV=1	1	6	6	12.7	54.92	488	12.7	3.3	365400000	607360000
O76512	CAEEL Regulator of nonsense transcripts 1	smg-2	sp|O76512|RENT1_CAEEL Regulator of nonsense transcripts 1 OS=Caenorhabditis elegans OX=6239 GN=smg-2 PE=1 SV=1	1	6	6	5	120.02	1069	5	1.5	218320000	384200000
P34574	CAEEL Probable clathrin heavy chain 1	chc-1	sp|P34574|CLH_CAEEL Probable clathrin heavy chain 1 OS=Caenorhabditis elegans OX=6239 GN=chc-1 PE=1 SV=1	1	6	6	3.4	191.54	1681	3.4	0.5	168820000	35865000
Q94271	CAEEL Peptidase A1 domain-containing protein	asp-14	tr|Q94271|Q94271_CAEEL Peptidase A1 domain-containing protein OS=Caenorhabditis elegans OX=6239 GN=asp-14 PE=1 SV=2	1	6	6	16.4	39.717	366	10.9	7.7	1570000000	2644100000
P09446;P20163;P27420	CAEEL Heat shock 70 kDa protein A	hsp-1	sp|P09446|HSP7A_CAEEL Heat shock 70 kDa protein A OS=Caenorhabditis elegans OX=6239 GN=hsp-1 PE=1 SV=2	3	6	5	7.8	69.722	640	5.8	4.4	299080000	688620000
Q7JPI2;Q19866;Q18907	CAEEL Suppressor of forked homolog	suf-1	tr|Q7JPI2|Q7JPI2_CAEEL Suppressor of forked homolog OS=Caenorhabditis elegans OX=6239 GN=suf-1 PE=2 SV=1;tr|Q19866|Q19866_CAEEL Suf domain-containing protein OS=Caenorhabditis elegans OX=6239 GN=suf-1 PE=1 SV=1;tr|Q18907|Q18907_CAEEL Cleavage stimulation f	3	5	5	6.8	84.145	730	6.8	2.2	1074700000	422170000
Q8WQD8;Q21614	CAEEL Alpha-carbonic anhydrase domain-containing protein	cah-4	tr|Q8WQD8|Q8WQD8_CAEEL Alpha-carbonic anhydrase domain-containing protein OS=Caenorhabditis elegans OX=6239 GN=cah-4 PE=1 SV=1;tr|Q21614|Q21614_CAEEL Alpha-carbonic anhydrase domain-containing protein OS=Caenorhabditis elegans OX=6239 GN=cah-4 PE=1 SV=3	2	5	5	17	26.17	235	17	8.9	1588800000	992490000
Q23621	CAEEL Glutamate dehydrogenase	gdh-1	tr|Q23621|Q23621_CAEEL Glutamate dehydrogenase OS=Caenorhabditis elegans OX=6239 GN=gdh-1 PE=1 SV=1	1	5	5	10.4	58.794	536	10.4	3.4	343100000	334220000
Q966I7;Q8MXU9	CAEEL CCHC-type domain-containing protein	CELE_K08D12.3	tr|Q966I7|Q966I7_CAEEL CCHC-type domain-containing protein OS=Caenorhabditis elegans OX=6239 GN=CELE_K08D12.3 PE=1 SV=1	2	5	5	32.5	15.557	151	32.5	32.5	779570000	1116200000
G5ECU3;P40614	CAEEL Phosphate carrier protein, mitochondrial	CELE_F01G4.6	tr|G5ECU3|G5ECU3_CAEEL Phosphate carrier protein, mitochondrial OS=Caenorhabditis elegans OX=6239 GN=CELE_F01G4.6 PE=1 SV=1;sp|P40614|MPCP_CAEEL Phosphate carrier protein, mitochondrial OS=Caenorhabditis elegans OX=6239 GN=F01G4.6 PE=2 SV=1	2	4	4	10.9	42.09	387	8.5	2.3	74681000	0
O44400	CAEEL Protein F37C4.5	F37C4.5	sp|O44400|F37C4_CAEEL Protein F37C4.5 OS=Caenorhabditis elegans OX=6239 GN=F37C4.5 PE=1 SV=3	1	4	4	7	61.443	556	7	1.4	101520000	78106000
O45934	CAEEL Uncharacterized protein	CELE_Y43F4B.5	tr|O45934|O45934_CAEEL Uncharacterized protein OS=Caenorhabditis elegans OX=6239 GN=CELE_Y43F4B.5 PE=1 SV=1	1	4	4	6.1	66.586	595	4.5	1.5	99752000	0
O76447	CAEEL HoloCentric chromosome binding Protein	hcp-1	tr|O76447|O76447_CAEEL HoloCentric chromosome binding Protein OS=Caenorhabditis elegans OX=6239 GN=hcp-1 PE=1 SV=1	1	4	4	3.9	166.76	1475	3.9	0	49726000	0
Q6A8K1;P10986;P10984;P0DM42;P0DM41;Q95ZL1	CAEEL Actin-4	act-4	tr|Q6A8K1|Q6A8K1_CAEEL Actin-4 OS=Caenorhabditis elegans OX=6239 GN=act-4 PE=1 SV=1;sp|P10986|ACT4_CAEEL Actin-4 OS=Caenorhabditis elegans OX=6239 GN=act-4 PE=3 SV=2;sp|P10984|ACT2_CAEEL Actin-2 OS=Caenorhabditis elegans OX=6239 GN=act-2 PE=3 SV=3;sp|P0DM4	6	6	4	22.9	40.426	362	22.9	8.6	1856300000	268000000
P54216	CAEEL Fructose-bisphosphate aldolase 1	aldo-1	sp|P54216|ALF1_CAEEL Fructose-bisphosphate aldolase 1 OS=Caenorhabditis elegans OX=6239 GN=aldo-1 PE=1 SV=1	1	4	4	10.1	39.24	366	10.1	1.9	188230000	114780000
P54412	CAEEL Probable elongation factor 1-gamma	eef-1G	sp|P54412|EF1G_CAEEL Probable elongation factor 1-gamma OS=Caenorhabditis elegans OX=6239 GN=eef-1G PE=1 SV=1	1	4	4	12.3	44.387	398	12.3	2.5	160760000	203400000
Q19864	CAEEL WD_REPEATS_REGION domain-containing protein	cpf-1	tr|Q19864|Q19864_CAEEL WD_REPEATS_REGION domain-containing protein OS=Caenorhabditis elegans OX=6239 GN=cpf-1 PE=1 SV=1	1	4	4	8.8	47.961	430	8.8	0	332940000	0
Q22494	CAEEL Probable V-type proton ATPase subunit H 2	vha-15	sp|Q22494|VATH2_CAEEL Probable V-type proton ATPase subunit H 2 OS=Caenorhabditis elegans OX=6239 GN=vha-15 PE=3 SV=1	1	4	4	9.8	54.212	470	9.8	0	66407000	0
Q9N358;U4PBK9	CAEEL T-complex protein 1 subunit theta	cct-8	sp|Q9N358|TCPQ_CAEEL T-complex protein 1 subunit theta OS=Caenorhabditis elegans OX=6239 GN=cct-8 PE=1 SV=3;tr|U4PBK9|U4PBK9_CAEEL T-complex protein 1 subunit theta OS=Caenorhabditis elegans OX=6239 GN=cct-8 PE=1 SV=1	2	4	4	6.9	59.733	548	6.9	3.1	182320000	140000000
Q9XW92	CAEEL V-type proton ATPase catalytic subunit A	vha-13	sp|Q9XW92|VATA_CAEEL V-type proton ATPase catalytic subunit A OS=Caenorhabditis elegans OX=6239 GN=vha-13 PE=1 SV=3	1	4	4	9.4	66.459	606	5.9	3.5	106960000	0
A0A061ACR1;Q2XN02;F5GUA3;Q22498	CAEEL Coatomer subunit gamma	copg-1	tr|A0A061ACR1|A0A061ACR1_CAEEL Coatomer subunit gamma OS=Caenorhabditis elegans OX=6239 GN=copg-1 PE=1 SV=1;tr|Q2XN02|Q2XN02_CAEEL Coatomer subunit gamma OS=Caenorhabditis elegans OX=6239 GN=copg-1 PE=1 SV=1;tr|F5GUA3|F5GUA3_CAEEL Coatomer subunit gamma OS	4	3	3	3.8	96.57	872	3.8	1	36325000	0
A0A486WVA9;A0A486WWW2;A0A486WV77;A0A486WWC7;Q9N533	CAEEL WD_REPEATS_REGION domain-containing protein	CELE_Y32H12A.8	tr|A0A486WVA9|A0A486WVA9_CAEEL WD_REPEATS_REGION domain-containing protein OS=Caenorhabditis elegans OX=6239 GN=CELE_Y32H12A.8 PE=1 SV=1;tr|A0A486WWW2|A0A486WWW2_CAEEL WD_REPEATS_REGION domain-containing protein OS=Caenorhabditis elegans OX=6239 GN=CELE_Y3	5	3	3	0.9	415.6	3547	0.9	0	45566000	0
A5Z2S3;O62263	CAEEL Uncharacterized protein	CELE_F54B3.1	tr|A5Z2S3|A5Z2S3_CAEEL Uncharacterized protein OS=Caenorhabditis elegans OX=6239 GN=CELE_F54B3.1 PE=1 SV=2;tr|O62263|O62263_CAEEL Uncharacterized protein OS=Caenorhabditis elegans OX=6239 GN=CELE_F54B3.1 PE=1 SV=2	2	3	3	0.9	410.99	3563	0.9	0	41939000	0
B3GWB2;Q17832	CAEEL ViGiLN homolog	vgln-1	tr|B3GWB2|B3GWB2_CAEEL ViGiLN homolog OS=Caenorhabditis elegans OX=6239 GN=vgln-1 PE=1 SV=1;tr|Q17832|Q17832_CAEEL ViGiLN homolog OS=Caenorhabditis elegans OX=6239 GN=vgln-1 PE=1 SV=2	2	3	3	3.8	101.83	925	3.8	0	25489000	0
G5EFS5;Q9N5T2	CAEEL Uncharacterized protein	CELE_F45D11.15	tr|G5EFS5|G5EFS5_CAEEL Uncharacterized protein OS=Caenorhabditis elegans OX=6239 GN=CELE_F45D11.15 PE=4 SV=1;tr|Q9N5T2|Q9N5T2_CAEEL Uncharacterized protein OS=Caenorhabditis elegans OX=6239 GN=CELE_F45D11.14 PE=1 SV=1	2	3	3	5.8	58.554	501	5.8	0	28310000	0
Q6EZG4;H2KZJ5	CAEEL GLutaRedoXin	glrx-3	tr|Q6EZG4|Q6EZG4_CAEEL GLutaRedoXin OS=Caenorhabditis elegans OX=6239 GN=glrx-3 PE=1 SV=1;tr|H2KZJ5|H2KZJ5_CAEEL GLutaRedoXin OS=Caenorhabditis elegans OX=6239 GN=glrx-3 PE=1 SV=1	2	3	3	13.7	37.939	342	13.7	0	32483000	0
V6CIR8;Q9UB95;Q9UB94;Q9U4E4;O44191	CAEEL Receptor Mediated Endocytosis	rme-2	tr|V6CIR8|V6CIR8_CAEEL Receptor Mediated Endocytosis OS=Caenorhabditis elegans OX=6239 GN=rme-2 PE=1 SV=1;tr|Q9UB95|Q9UB95_CAEEL Lipoprotein receptor OS=Caenorhabditis elegans OX=6239 PE=2 SV=1;tr|Q9UB94|Q9UB94_CAEEL Lr protein OS=Caenorhabditis elegans OX	5	3	3	3.5	94.126	846	3.5	0	49259000	0
O45148	CAEEL Lipoyl-binding domain-containing protein	dlst-1	tr|O45148|O45148_CAEEL Lipoyl-binding domain-containing protein OS=Caenorhabditis elegans OX=6239 GN=dlst-1 PE=1 SV=2	1	3	3	7.1	49.813	463	7.1	3.2	904970000	24524000
P10299	CAEEL Glutathione S-transferase P	gst-1	sp|P10299|GSTP1_CAEEL Glutathione S-transferase P OS=Caenorhabditis elegans OX=6239 GN=gst-1 PE=1 SV=1	1	3	3	9.6	23.901	208	9.6	0	359860000	0
P41932;N1NV25	CAEEL 14-3-3-like protein 1	par-5	sp|P41932|14331_CAEEL 14-3-3-like protein 1 OS=Caenorhabditis elegans OX=6239 GN=par-5 PE=1 SV=2	2	5	3	19.4	28.19	248	19.4	10.1	543320000	155900000
P48152	CAEEL 40S ribosomal protein S3	rps-3	sp|P48152|RS3_CAEEL 40S ribosomal protein S3 OS=Caenorhabditis elegans OX=6239 GN=rps-3 PE=3 SV=1	1	3	3	9.7	27.313	247	9.7	3.2	55513000	240850000
P50140;G8JYF5;Q9U3B0;V6CLG8	CAEEL Chaperonin homolog Hsp-60, mitochondrial	hsp-60	sp|P50140|CH60_CAEEL Chaperonin homolog Hsp-60, mitochondrial OS=Caenorhabditis elegans OX=6239 GN=hsp-60 PE=2 SV=2;tr|G8JYF5|G8JYF5_CAEEL Chaperonin homolog Hsp-60, mitochondrial OS=Caenorhabditis elegans OX=6239 GN=hsp-60 PE=1 SV=1	4	3	3	6.9	60.1	568	6.9	2.1	16353000	5754500
P53013	CAEEL Elongation factor 1-alpha	eft-3	sp|P53013|EF1A_CAEEL Elongation factor 1-alpha OS=Caenorhabditis elegans OX=6239 GN=eft-3 PE=3 SV=1	1	3	3	6.7	50.668	463	4.3	5	226810000	67774000
P55326	CAEEL Uncharacterized protein F13E6.1	F13E6.1	sp|P55326|YZG1_CAEEL Uncharacterized protein F13E6.1 OS=Caenorhabditis elegans OX=6239 GN=F13E6.1 PE=3 SV=2	1	3	3	15.9	21.287	195	15.9	0	105590000	0
Q03604	CAEEL Ribonucleoside-diphosphate reductase large subunit	rnr-1	sp|Q03604|RIR1_CAEEL Ribonucleoside-diphosphate reductase large subunit OS=Caenorhabditis elegans OX=6239 GN=rnr-1 PE=3 SV=1	1	3	3	3.2	88.969	788	3.2	3.2	108910000	107220000
Q09544	CAEEL ATP synthase subunit delta, mitochondrial	F58F12.1	sp|Q09544|ATPD_CAEEL ATP synthase subunit delta, mitochondrial OS=Caenorhabditis elegans OX=6239 GN=F58F12.1 PE=1 SV=1	1	3	3	16.6	16.927	163	16.6	11	159710000	462710000
Q17770	CAEEL Protein disulfide-isomerase 2	pdi-2	sp|Q17770|PDI2_CAEEL Protein disulfide-isomerase 2 OS=Caenorhabditis elegans OX=6239 GN=pdi-2 PE=1 SV=1	1	3	3	5.7	55.152	493	5.7	1.6	310010000	14378000
Q18964	CAEEL WD repeat and FYVE domain-containing protein 2	wdfy-2	sp|Q18964|WDFY2_CAEEL WD repeat and FYVE domain-containing protein 2 OS=Caenorhabditis elegans OX=6239 GN=wdfy-2 PE=1 SV=1	1	3	3	8.2	46.239	415	8.2	0	58366000	0
Q19057	CAEEL Acyl CoA DeHydrogenase	acdh-12	tr|Q19057|Q19057_CAEEL Acyl CoA DeHydrogenase OS=Caenorhabditis elegans OX=6239 GN=acdh-12 PE=1 SV=1	1	3	3	4.6	66.171	613	4.6	0	31999000	0
Q20363	CAEEL Stress-induced protein 1	sip-1	sp|Q20363|SIP1_CAEEL Stress-induced protein 1 OS=Caenorhabditis elegans OX=6239 GN=sip-1 PE=1 SV=1	1	3	3	17	17.839	159	17	5	302970000	939370000
Q20780;Q8IG19	CAEEL Aldedh domain-containing protein	alh-1	tr|Q20780|Q20780_CAEEL Aldedh domain-containing protein OS=Caenorhabditis elegans OX=6239 GN=alh-1 PE=1 SV=3	2	3	3	6.1	55.058	510	6.1	2	266970000	300330000
Q21770;D9N120	CAEEL Argonaute protein wago-1	wago-1	sp|Q21770|WAGO1_CAEEL Argonaute protein wago-1 OS=Caenorhabditis elegans OX=6239 GN=wago-1 PE=1 SV=1	2	3	3	3.3	105.44	945	3.3	0.7	45104000	795250000
Q22054	CAEEL 40S ribosomal protein S16	rps-16	sp|Q22054|RS16_CAEEL 40S ribosomal protein S16 OS=Caenorhabditis elegans OX=6239 GN=rps-16 PE=1 SV=3	1	3	3	19.4	16.316	144	19.4	0	98589000	0
Q22993	CAEEL Phosphoethanolamine MethylTransferase	pmt-2	tr|Q22993|Q22993_CAEEL Phosphoethanolamine MethylTransferase OS=Caenorhabditis elegans OX=6239 GN=pmt-2 PE=1 SV=1	1	3	3	6.4	49.768	437	6.4	1.8	72471000	246680000
Q4TT88	CAEEL Puromycin-sensitive aminopeptidase	pam-1	sp|Q4TT88|PSA_CAEEL Puromycin-sensitive aminopeptidase OS=Caenorhabditis elegans OX=6239 GN=pam-1 PE=1 SV=1	1	3	3	3	107.15	948	3	0	23675000	0
Q8T8N8;Q9BIC3;Q9GYT0	CAEEL Enoyl-CoA Hydratase	ech-1.2	tr|Q8T8N8|Q8T8N8_CAEEL Enoyl-CoA Hydratase OS=Caenorhabditis elegans OX=6239 GN=ech-1.2 PE=1 SV=1;tr|Q9BIC3|Q9BIC3_CAEEL Enoyl-CoA Hydratase OS=Caenorhabditis elegans OX=6239 GN=ech-1.2 PE=1 SV=1;tr|Q9GYT0|Q9GYT0_CAEEL Enoyl-CoA Hydratase OS=Caenorhabditis	3	3	3	3.9	75.618	697	3.9	1.3	59061000	28707000
Q93235	CAEEL Sodium/potassium-transporting ATPase subunit beta-1	nkb-1	sp|Q93235|AT1B1_CAEEL Sodium/potassium-transporting ATPase subunit beta-1 OS=Caenorhabditis elegans OX=6239 GN=nkb-1 PE=1 SV=1	1	3	3	9.1	36.672	320	9.1	0	123380000	0
Q93572	CAEEL 60S acidic ribosomal protein P0	rla-0	sp|Q93572|RLA0_CAEEL 60S acidic ribosomal protein P0 OS=Caenorhabditis elegans OX=6239 GN=rla-0 PE=1 SV=3	1	3	3	13.5	33.774	312	13.5	0	177760000	0
Q95X44	CAEEL Vacuolar H ATPase	vha-8	tr|Q95X44|Q95X44_CAEEL Vacuolar H ATPase OS=Caenorhabditis elegans OX=6239 GN=vha-8 PE=1 SV=1	1	3	3	12.4	25.586	226	12.4	7.5	126810000	210590000
Q9XWD6	CAEEL Cell death abnormality protein 1	ced-1	sp|Q9XWD6|CED1_CAEEL Cell death abnormality protein 1 OS=Caenorhabditis elegans OX=6239 GN=ced-1 PE=1 SV=1	1	3	3	3.9	118.8	1111	0.8	3.9	30316000	207810000000
Q8IG31;H2KZL7;A0A0K3AUJ9;Q21824	CAEEL Thioredoxin domain-containing protein	prdx-2	tr|Q8IG31|Q8IG31_CAEEL Thioredoxin domain-containing protein OS=Caenorhabditis elegans OX=6239 GN=prdx-2 PE=1 SV=1;tr|H2KZL7|H2KZL7_CAEEL Thioredoxin domain-containing protein OS=Caenorhabditis elegans OX=6239 GN=prdx-2 PE=1 SV=1;tr|A0A0K3AUJ9|A0A0K3AUJ9_C	4	2	2	7.7	21.785	195	7.7	0	116210000	0
A0A0M7RDX7;Q9N4X8	CAEEL GST C-terminal domain-containing protein	gst-10	tr|A0A0M7RDX7|A0A0M7RDX7_CAEEL GST C-terminal domain-containing protein OS=Caenorhabditis elegans OX=6239 GN=gst-10 PE=1 SV=1;sp|Q9N4X8|GSTPA_CAEEL Glutathione S-transferase P 10 OS=Caenorhabditis elegans OX=6239 GN=gst-10 PE=1 SV=3	2	2	2	14.3	14.282	119	14.3	0	57808000	0
A0A2C9C2Z1;A0A2C9C3A7;Q9N4M4	CAEEL KASH domain-containing protein	anc-1	tr|A0A2C9C2Z1|A0A2C9C2Z1_CAEEL KASH domain-containing protein OS=Caenorhabditis elegans OX=6239 GN=anc-1 PE=1 SV=1;tr|A0A2C9C3A7|A0A2C9C3A7_CAEEL Nuclear anchorage protein 1 OS=Caenorhabditis elegans OX=6239 GN=anc-1 PE=1 SV=1;sp|Q9N4M4|ANC1_CAEEL Nuclear	3	2	2	1.6	840.47	7540	1.6	0	22178000	0
A0A2C9C3L5;P98080;A0A2C9C366;A0A2C9C3F6	CAEEL Cytochrome b-c1 complex subunit 1, mitochondrial	ucr-1	tr|A0A2C9C3L5|A0A2C9C3L5_CAEEL Cytochrome b-c1 complex subunit 1, mitochondrial OS=Caenorhabditis elegans OX=6239 GN=ucr-1 PE=1 SV=1;sp|P98080|UCR1_CAEEL Cytochrome b-c1 complex subunit 1, mitochondrial OS=Caenorhabditis elegans OX=6239 GN=ucr-1 PE=3 SV=2;	4	2	2	4	51.948	473	4	0	20261000	0
A7LPE6;P34517;A7LPE5;Q7JMU1	CAEEL Glycerol-3-phosphate dehydrogenase [NAD(+)]	gpdh-2	tr|A7LPE6|A7LPE6_CAEEL Glycerol-3-phosphate dehydrogenase [NAD(+)] OS=Caenorhabditis elegans OX=6239 GN=gpdh-2 PE=1 SV=1;sp|P34517|GPDH2_CAEEL Probable glycerol-3-phosphate dehydrogenase 2 OS=Caenorhabditis elegans OX=6239 GN=gpdh-2 PE=3 SV=2;tr|A7LPE5|A7L	4	2	2	4.7	39.281	360	4.7	2.5	32029000	0
A8WHP8	CAEEL Perilipin-1 homolog	plin-1	sp|A8WHP8|PLIN1_CAEEL Perilipin-1 homolog OS=Caenorhabditis elegans OX=6239 GN=plin-1 PE=1 SV=1	1	2	2	5	46.523	418	5	0	39099000	0
Q17948;Q9U3Q1;H9G2X3;A9UJN4	CAEEL Serine/threonine protein phosphatase 2A regulatory subunit	pptr-2	tr|Q17948|Q17948_CAEEL Serine/threonine protein phosphatase 2A regulatory subunit OS=Caenorhabditis elegans OX=6239 GN=pptr-2 PE=1 SV=1;tr|Q9U3Q1|Q9U3Q1_CAEEL Serine/threonine protein phosphatase 2A regulatory subunit OS=Caenorhabditis elegans OX=6239 GN=p	4	2	2	3.1	64.441	557	3.1	0	49690000	0
C0HLB4;C0HLB3	CAEEL V-type proton ATPase 16 kDa proteolipid subunit 3	vha-3	sp|C0HLB4|VATL3_CAEEL V-type proton ATPase 16 kDa proteolipid subunit 3 OS=Caenorhabditis elegans OX=6239 GN=vha-3 PE=2 SV=1;sp|C0HLB3|VATL2_CAEEL V-type proton ATPase 16 kDa proteolipid subunit 2 OS=Caenorhabditis elegans OX=6239 GN=vha-2 PE=2 SV=1	2	2	2	13	16.409	161	13	5.6	84980000	80994000
G1K101;G1K104	CAEEL SNF2_N domain-containing protein	CELE_M04C3.2	tr|G1K101|G1K101_CAEEL SNF2_N domain-containing protein OS=Caenorhabditis elegans OX=6239 GN=CELE_M04C3.2 PE=1 SV=1;tr|G1K104|G1K104_CAEEL SNF2_N domain-containing protein OS=Caenorhabditis elegans OX=6239 GN=CELE_M04C3.2 PE=1 SV=1	2	2	2	7.1	67.558	578	1.7	5.4	25286000	0
G3MU69;O45865;Q17407	CAEEL Adenine Nucleotide Translocator	ant-1.1	tr|G3MU69|G3MU69_CAEEL Adenine Nucleotide Translocator OS=Caenorhabditis elegans OX=6239 GN=ant-1.1 PE=1 SV=1;tr|O45865|O45865_CAEEL Adenine Nucleotide Translocator OS=Caenorhabditis elegans OX=6239 GN=ant-1.1 PE=1 SV=1;tr|Q17407|Q17407_CAEEL ADP/ATP trans	3	2	2	8.7	26.854	242	8.7	0	19009000	0
G5EBF3	CAEEL Protein Up-regulated in Daf-2(Gf)	pud-2.1	tr|G5EBF3|G5EBF3_CAEEL Protein Up-regulated in Daf-2(Gf) OS=Caenorhabditis elegans OX=6239 GN=pud-2.1 PE=1 SV=1	1	2	2	14.3	17.428	154	14.3	0	16066000	0
G5EBK0	CAEEL DEP domain-containing protein	CELE_T08A11.1	tr|G5EBK0|G5EBK0_CAEEL DEP domain-containing protein OS=Caenorhabditis elegans OX=6239 GN=CELE_T08A11.1 PE=1 SV=1	1	2	2	1.4	213.92	1872	1.4	0	12044000	0
G5EDV7	CAEEL Uncharacterized protein	CELE_Y53H1B.2	tr|G5EDV7|G5EDV7_CAEEL Uncharacterized protein OS=Caenorhabditis elegans OX=6239 GN=CELE_Y53H1B.2 PE=1 SV=1	1	2	2	9.5	25.731	222	9.5	4.5	14502000	15630000
G5EE04	CAEEL TPR_REGION domain-containing protein	hip-1	tr|G5EE04|G5EE04_CAEEL TPR_REGION domain-containing protein OS=Caenorhabditis elegans OX=6239 GN=hip-1 PE=1 SV=1	1	2	2	4	44.744	422	1.9	2.1	0	41727000
G5EEV5	CAEEL 5C820	pud-3	tr|G5EEV5|G5EEV5_CAEEL 5C820 OS=Caenorhabditis elegans OX=6239 GN=pud-3 PE=1 SV=1	1	2	2	15.1	19.437	172	15.1	8.7	30182000	14600000
G5EFM7	CAEEL Uncharacterized protein	CELE_F18C12.3	tr|G5EFM7|G5EFM7_CAEEL Uncharacterized protein OS=Caenorhabditis elegans OX=6239 GN=CELE_F18C12.3 PE=1 SV=1	1	2	2	3.5	61.661	545	3.5	0	12814000	0
I7FW32;Q9UAQ6	CAEEL Rab-1 (Fragment)	rab-1	tr|I7FW32|I7FW32_CAEEL Rab-1 (Fragment) OS=Caenorhabditis elegans OX=6239 GN=rab-1 PE=2 SV=1;tr|Q9UAQ6|Q9UAQ6_CAEEL RAB family OS=Caenorhabditis elegans OX=6239 GN=rab-1 PE=1 SV=1	2	2	2	11.8	22.414	204	11.8	4.9	265560000	127780000
O01541	CAEEL Alanine--tRNA ligase, cytoplasmic	aars-2	sp|O01541|SYAC_CAEEL Alanine--tRNA ligase, cytoplasmic OS=Caenorhabditis elegans OX=6239 GN=aars-2 PE=2 SV=1	1	2	2	2.3	106.78	968	2.3	0.9	32272000	33888000
O02286;Q7JKI1;Q7JKI3;Q7JKI2	CAEEL Phosphoenolypyruvate CarboxyKinase	pck-2	tr|O02286|O02286_CAEEL Phosphoenolypyruvate CarboxyKinase OS=Caenorhabditis elegans OX=6239 GN=pck-2 PE=1 SV=1;tr|Q7JKI1|Q7JKI1_CAEEL Phosphoenolypyruvate CarboxyKinase OS=Caenorhabditis elegans OX=6239 GN=pck-2 PE=1 SV=1;tr|Q7JKI3|Q7JKI3_CAEEL Phosphoenol	4	2	2	2.6	73.431	654	2.6	2.6	335700000	183800000
O17328	CAEEL MFS domain-containing protein	mct-6	tr|O17328|O17328_CAEEL MFS domain-containing protein OS=Caenorhabditis elegans OX=6239 GN=mct-6 PE=1 SV=2	1	2	2	3.5	63.517	594	3.5	1.9	107690000	69439000
O17759	CAEEL Transket_pyr domain-containing protein	tkt-1	tr|O17759|O17759_CAEEL Transket_pyr domain-containing protein OS=Caenorhabditis elegans OX=6239 GN=tkt-1 PE=1 SV=1	1	2	2	3.2	66.01	618	3.2	1.5	75076000	106430000
O17861	CAEEL GILT-like protein F37H8.5	F37H8.5	sp|O17861|YVRI_CAEEL GILT-like protein F37H8.5 OS=Caenorhabditis elegans OX=6239 GN=F37H8.5 PE=1 SV=1	1	2	2	6.1	30.844	277	6.1	0	41347000	0
O18650	CAEEL 40S ribosomal protein S19	rps-19	sp|O18650|RS19_CAEEL 40S ribosomal protein S19 OS=Caenorhabditis elegans OX=6239 GN=rps-19 PE=2 SV=1	1	2	2	11	16.322	146	11	11	121430000	135730000
O45577	CAEEL RRM domain-containing protein	cpf-2	tr|O45577|O45577_CAEEL RRM domain-containing protein OS=Caenorhabditis elegans OX=6239 GN=cpf-2 PE=1 SV=1	1	2	2	6.5	37.035	336	6.5	3	48549000	10870000
U4PC51;O61199	CAEEL Transket_pyr domain-containing protein	ogdh-1	tr|U4PC51|U4PC51_CAEEL Transket_pyr domain-containing protein OS=Caenorhabditis elegans OX=6239 GN=ogdh-1 PE=1 SV=1;sp|O61199|ODO1_CAEEL 2-oxoglutarate dehydrogenase, mitochondrial OS=Caenorhabditis elegans OX=6239 GN=ogdh-1 PE=1 SV=2	2	2	2	2.6	90.993	802	2.6	1.4	156950000	23604000
O61235;U4PE16;Q8MYL7;Q27487	CAEEL Catalase-2	ctl-1	sp|O61235|CATA2_CAEEL Catalase-2 OS=Caenorhabditis elegans OX=6239 GN=ctl-1 PE=1 SV=3;tr|U4PE16|U4PE16_CAEEL Catalase OS=Caenorhabditis elegans OX=6239 GN=ctl-3 PE=1 SV=1;tr|Q8MYL7|Q8MYL7_CAEEL Catalase OS=Caenorhabditis elegans OX=6239 GN=ctl-3 PE=1 SV=1;	4	2	2	5	57.304	497	5	2	41664000	32232000
P17331;P04970;P17330;P17329	CAEEL Glyceraldehyde-3-phosphate dehydrogenase 4	gpd-4	sp|P17331|G3P4_CAEEL Glyceraldehyde-3-phosphate dehydrogenase 4 OS=Caenorhabditis elegans OX=6239 GN=gpd-4 PE=3 SV=1;sp|P04970|G3P1_CAEEL Glyceraldehyde-3-phosphate dehydrogenase 1 OS=Caenorhabditis elegans OX=6239 GN=gpd-1 PE=3 SV=1;sp|P17330|G3P3_CAEEL G	4	2	2	7.3	36.426	341	7.3	0	43644000	0
P27604	CAEEL Adenosylhomocysteinase	ahcy-1	sp|P27604|SAHH_CAEEL Adenosylhomocysteinase OS=Caenorhabditis elegans OX=6239 GN=ahcy-1 PE=3 SV=1	1	2	2	5.5	47.535	437	5.5	0	16441000	0
P27639	CAEEL Eukaryotic initiation factor 4A	inf-1	sp|P27639|IF4A_CAEEL Eukaryotic initiation factor 4A OS=Caenorhabditis elegans OX=6239 GN=inf-1 PE=2 SV=1	1	2	2	4.2	45.407	402	4.2	0	48866000	0
P34339	CAEEL Eukaryotic translation initiation factor 3 subunit A	egl-45	sp|P34339|EIF3A_CAEEL Eukaryotic translation initiation factor 3 subunit A OS=Caenorhabditis elegans OX=6239 GN=egl-45 PE=3 SV=1	1	2	2	2	124.41	1076	2	0.9	39930000	84607000
Q9TYW0;P34466	CAEEL Clustered mitochondria protein homolog	clu-1	tr|Q9TYW0|Q9TYW0_CAEEL Clustered mitochondria protein homolog OS=Caenorhabditis elegans OX=6239 GN=clu-1 PE=2 SV=1;sp|P34466|CLU_CAEEL Clustered mitochondria protein homolog OS=Caenorhabditis elegans OX=6239 GN=clu-1 PE=3 SV=1	2	2	2	1.5	139.99	1247	1.5	0	6627600	0
P34540	CAEEL Kinesin heavy chain	unc-116	sp|P34540|KINH_CAEEL Kinesin heavy chain OS=Caenorhabditis elegans OX=6239 GN=unc-116 PE=2 SV=2	1	2	2	2.5	91.893	815	1.3	1.1	1352500	0
P34689;Q966L9	CAEEL ATP-dependent RNA helicase glh-1	glh-1	sp|P34689|GLH1_CAEEL ATP-dependent RNA helicase glh-1 OS=Caenorhabditis elegans OX=6239 GN=glh-1 PE=1 SV=3;sp|Q966L9|GLH2_CAEEL ATP-dependent RNA helicase glh-2 OS=Caenorhabditis elegans OX=6239 GN=glh-2 PE=1 SV=1	2	2	2	2.5	79.779	763	2.5	1	98807000	155430000
P34696;Q21062	CAEEL Heat shock protein Hsp-16.1/Hsp-16.11	hsp-16.1	sp|P34696|HSP11_CAEEL Heat shock protein Hsp-16.1/Hsp-16.11 OS=Caenorhabditis elegans OX=6239 GN=hsp-16.1 PE=2 SV=1;tr|Q21062|Q21062_CAEEL Heat shock protein 16-1 OS=Caenorhabditis elegans OX=6239 PE=3 SV=1	2	2	2	18.6	16.253	145	0	18.6	0	63691000
P46563;G8JY45	CAEEL Fructose-bisphosphate aldolase 2	aldo-2	sp|P46563|ALF2_CAEEL Fructose-bisphosphate aldolase 2 OS=Caenorhabditis elegans OX=6239 GN=aldo-2 PE=2 SV=1;tr|G8JY45|G8JY45_CAEEL Fructose-bisphosphate aldolase OS=Caenorhabditis elegans OX=6239 GN=aldo-2 PE=1 SV=1	2	2	2	4.6	38.846	366	4.6	4.6	128070000	303980000
P47207	CAEEL T-complex protein 1 subunit beta	cct-2	sp|P47207|TCPB_CAEEL T-complex protein 1 subunit beta OS=Caenorhabditis elegans OX=6239 GN=cct-2 PE=1 SV=2	1	2	2	3.6	56.974	529	3.6	0	39379000	0
P49041	CAEEL 40S ribosomal protein S5	rps-5	sp|P49041|RS5_CAEEL 40S ribosomal protein S5 OS=Caenorhabditis elegans OX=6239 GN=rps-5 PE=3 SV=1	1	2	2	8.1	23.154	210	8.1	0	90682000	0
P50093	CAEEL Mitochondrial prohibitin complex protein 2	phb-2	sp|P50093|PHB2_CAEEL Mitochondrial prohibitin complex protein 2 OS=Caenorhabditis elegans OX=6239 GN=phb-2 PE=1 SV=2	1	2	2	7.1	32.667	294	7.1	0	46974000	0
Q27522;P50306;P50305;O17680	CAEEL Probable S-adenosylmethionine synthase 5	sams-5	sp|Q27522|METK5_CAEEL Probable S-adenosylmethionine synthase 5 OS=Caenorhabditis elegans OX=6239 GN=sams-5 PE=3 SV=2;sp|P50306|METK4_CAEEL Probable S-adenosylmethionine synthase 4 OS=Caenorhabditis elegans OX=6239 GN=sams-4 PE=1 SV=1;sp|P50305|METK3_CAEEL	4	2	2	4	43.949	404	4	4	265550000	438370000
P52713	CAEEL Probable methylmalonate-semialdehyde dehydrogenase [acylating], mitochondrial	alh-8	sp|P52713|MMSA_CAEEL Probable methylmalonate-semialdehyde dehydrogenase [acylating], mitochondrial OS=Caenorhabditis elegans OX=6239 GN=alh-8 PE=3 SV=1	1	2	2	4.4	56.461	523	4.4	0	67184000	0
P53596	CAEEL Succinate--CoA ligase [ADP/GDP-forming] subunit alpha, mitochondrial	sucl-1	sp|P53596|SUCA_CAEEL Succinate--CoA ligase [ADP/GDP-forming] subunit alpha, mitochondrial OS=Caenorhabditis elegans OX=6239 GN=sucl-1 PE=3 SV=1	1	2	2	6.5	33.797	322	6.5	2.8	89580000	94272000
P91027	CAEEL Calponin-homology (CH) domain-containing protein	chdp-1	tr|P91027|P91027_CAEEL Calponin-homology (CH) domain-containing protein OS=Caenorhabditis elegans OX=6239 GN=chdp-1 PE=1 SV=1	1	2	2	9.2	35.916	338	9.2	3.6	9585400	20774000
P91303	CAEEL Probable V-type proton ATPase subunit G	vha-10	sp|P91303|VATG_CAEEL Probable V-type proton ATPase subunit G OS=Caenorhabditis elegans OX=6239 GN=vha-10 PE=3 SV=1	1	2	2	15.1	14.485	126	0	15.1	0	170530000
P91306	CAEEL CSD_1 domain-containing protein	cey-2	tr|P91306|P91306_CAEEL CSD_1 domain-containing protein OS=Caenorhabditis elegans OX=6239 GN=cey-2 PE=1 SV=1	1	2	2	7.1	29.404	267	3.7	3.4	9789000	0
P91453	CAEEL Uncharacterized protein	CELE_T19B4.5	tr|P91453|P91453_CAEEL Uncharacterized protein OS=Caenorhabditis elegans OX=6239 GN=CELE_T19B4.5 PE=1 SV=1	1	2	2	5	45.823	400	5	1.8	201610000	111770000
Q09607	CAEEL Probable glutathione S-transferase gst-36	gst-36	sp|Q09607|GST36_CAEEL Probable glutathione S-transferase gst-36 OS=Caenorhabditis elegans OX=6239 GN=gst-36 PE=3 SV=2	1	2	2	9	23.876	210	9	0	124760000	0
Q10661	CAEEL Dosage compensation protein dpy-30	dpy-30	sp|Q10661|DPY30_CAEEL Dosage compensation protein dpy-30 OS=Caenorhabditis elegans OX=6239 GN=dpy-30 PE=1 SV=1	1	2	2	20.3	12.837	123	20.3	20.3	46119000	66446000
Q17967	CAEEL Protein disulfide-isomerase 1	pdi-1	sp|Q17967|PDI1_CAEEL Protein disulfide-isomerase 1 OS=Caenorhabditis elegans OX=6239 GN=pdi-1 PE=3 SV=1	1	2	2	4.5	53.435	485	4.5	0	55050000	0
Q18066	CAEEL Disorganized muscle protein 1	dim-1	sp|Q18066|DIM_CAEEL Disorganized muscle protein 1 OS=Caenorhabditis elegans OX=6239 GN=dim-1 PE=1 SV=3	1	2	2	3.1	71.849	640	3.1	0	24067000	0
Q18655	CAEEL MFS domain-containing protein	C46C2.2	tr|Q18655|Q18655_CAEEL MFS domain-containing protein OS=Caenorhabditis elegans OX=6239 GN=C46C2.2 PE=1 SV=2	1	2	2	4.2	58.166	520	2.3	1.9	14400000	0
Q19626	CAEEL Probable V-type proton ATPase subunit B	vha-12	sp|Q19626|VATB_CAEEL Probable V-type proton ATPase subunit B OS=Caenorhabditis elegans OX=6239 GN=vha-12 PE=3 SV=1	1	2	2	4.5	54.75	491	4.5	0	60129000	0
Q20476	CAEEL BTB domain-containing protein	CELE_F46G10.1	tr|Q20476|Q20476_CAEEL BTB domain-containing protein OS=Caenorhabditis elegans OX=6239 GN=CELE_F46G10.1 PE=1 SV=3	1	2	2	11.2	20.368	178	11.2	11.2	113610000	8896900
W6EKY2;W6E8Z9;Q20655	CAEEL 14-3-3 zeta	ftt-2	tr|W6EKY2|W6EKY2_CAEEL 14-3-3 zeta OS=Caenorhabditis elegans OX=6239 GN=ftt-2 PE=1 SV=1;tr|W6E8Z9|W6E8Z9_CAEEL 14-3-3 zeta OS=Caenorhabditis elegans OX=6239 PE=3 SV=1;sp|Q20655|14332_CAEEL 14-3-3-like protein 2 OS=Caenorhabditis elegans OX=6239 GN=ftt-2 PE	3	4	2	14.5	27.732	248	14.5	6	74877000	0
Q20938	CAEEL Probable 26S proteasome regulatory subunit rpn-6.1	rpn-6.1	sp|Q20938|PS11A_CAEEL Probable 26S proteasome regulatory subunit rpn-6.1 OS=Caenorhabditis elegans OX=6239 GN=rpn-6.1 PE=2 SV=2	1	2	2	4.8	49.091	438	4.8	2.3	12909000	25691000
Q22235	CAEEL Endoplasmin homolog	enpl-1	sp|Q22235|ENPL1_CAEEL Endoplasmin homolog OS=Caenorhabditis elegans OX=6239 GN=enpl-1 PE=3 SV=1	1	3	2	4.7	87.111	760	4.7	1.2	38375000	0
Q22620;Q65ZK5	CAEEL Prolyl Amino-acyl tRNA Synthetase	pars-1	tr|Q22620|Q22620_CAEEL Prolyl Amino-acyl tRNA Synthetase OS=Caenorhabditis elegans OX=6239 GN=pars-1 PE=1 SV=1;tr|Q65ZK5|Q65ZK5_CAEEL Prolyl Amino-acyl tRNA Synthetase OS=Caenorhabditis elegans OX=6239 GN=pars-1 PE=1 SV=1	2	2	2	3.6	65.818	581	3.6	1.9	15190000	27307000
Q8T3D2;Q94010	CAEEL Uncharacterized protein	CELE_T08G11.1	tr|Q8T3D2|Q8T3D2_CAEEL Uncharacterized protein OS=Caenorhabditis elegans OX=6239 GN=CELE_T08G11.1 PE=1 SV=1;tr|Q94010|Q94010_CAEEL Uncharacterized protein OS=Caenorhabditis elegans OX=6239 GN=CELE_T08G11.1 PE=1 SV=1	2	2	2	0.8	356.56	3185	0.8	0	55072000	0
Q93168	CAEEL Aha1_N domain-containing protein	ahsa-1	tr|Q93168|Q93168_CAEEL Aha1_N domain-containing protein OS=Caenorhabditis elegans OX=6239 GN=ahsa-1 PE=1 SV=1	1	2	2	6.7	38.567	342	6.7	0	19734000	0
Q93545	CAEEL Uncharacterized protein	CELE_F20G2.2	tr|Q93545|Q93545_CAEEL Uncharacterized protein OS=Caenorhabditis elegans OX=6239 GN=CELE_F20G2.2 PE=1 SV=1	1	2	2	7.2	26.767	249	7.2	3.2	44646000	11969000
Q93934	CAEEL PfkB domain-containing protein	adk-1	tr|Q93934|Q93934_CAEEL PfkB domain-containing protein OS=Caenorhabditis elegans OX=6239 GN=adk-1 PE=1 SV=1	1	2	2	5.8	37.427	342	5.8	0	18495000	0
Q95008	CAEEL Proteasome subunit alpha type-5	pas-5	sp|Q95008|PSA5_CAEEL Proteasome subunit alpha type-5 OS=Caenorhabditis elegans OX=6239 GN=pas-5 PE=1 SV=1	1	2	2	9.7	27.207	248	9.7	0	8080900	0
Q95XJ0	CAEEL Uncharacterized protein	CELE_Y69A2AR.18	tr|Q95XJ0|Q95XJ0_CAEEL Uncharacterized protein OS=Caenorhabditis elegans OX=6239 GN=CELE_Y69A2AR.18 PE=1 SV=1	1	2	2	6.4	32.382	299	6.4	3.3	66733000	87371000
Q95XR0	CAEEL Tr-type G domain-containing protein	eif-2gamma	tr|Q95XR0|Q95XR0_CAEEL Tr-type G domain-containing protein OS=Caenorhabditis elegans OX=6239 GN=eif-2gamma PE=1 SV=1	1	2	2	4.1	51.234	469	4.1	2.1	31845000	12655000
Q95Y04	CAEEL 40S ribosomal protein S28	rps-28	sp|Q95Y04|RS28_CAEEL 40S ribosomal protein S28 OS=Caenorhabditis elegans OX=6239 GN=rps-28 PE=3 SV=1	1	2	2	32.3	7.4365	65	15.4	16.9	1643000	0
Q95YF3	CAEEL ATP-dependent RNA helicase cgh-1	cgh-1	sp|Q95YF3|CGH1_CAEEL ATP-dependent RNA helicase cgh-1 OS=Caenorhabditis elegans OX=6239 GN=cgh-1 PE=1 SV=1	1	2	2	6.3	48.713	430	6.3	6.3	179050000	359290000
Q9BKU4	CAEEL Mitochondrial prohibitin complex protein 1	phb-1	sp|Q9BKU4|PHB1_CAEEL Mitochondrial prohibitin complex protein 1 OS=Caenorhabditis elegans OX=6239 GN=phb-1 PE=1 SV=1	1	2	2	8.7	29.988	275	8.7	3.3	31898000	33907000
Q9GRZ9	CAEEL Transmembrane and Coiled-Coil protein	tcc-1	tr|Q9GRZ9|Q9GRZ9_CAEEL Transmembrane and Coiled-Coil protein OS=Caenorhabditis elegans OX=6239 GN=tcc-1 PE=1 SV=1	1	2	2	3.3	75.891	676	3.3	0	18552000	0
Q9GZH4	CAEEL Dolichyl-diphosphooligosaccharide--protein glycosyltransferase subunit 1	ribo-1	sp|Q9GZH4|RPN1_CAEEL Dolichyl-diphosphooligosaccharide--protein glycosyltransferase subunit 1 OS=Caenorhabditis elegans OX=6239 GN=ribo-1 PE=3 SV=2	1	2	2	3.6	65.736	586	3.6	1.7	66983000	24815000
Q9U2H9	CAEEL Probable elongation factor 1-beta/1-delta 2	eef-1B.2	sp|Q9U2H9|EF1B2_CAEEL Probable elongation factor 1-beta/1-delta 2 OS=Caenorhabditis elegans OX=6239 GN=eef-1B.2 PE=1 SV=4	1	2	2	9.9	28.172	263	9.9	3	21150000	117410000
Q9U2Q9	CAEEL Glycogen synthase kinase-3	gsk-3	sp|Q9U2Q9|GSK3_CAEEL Glycogen synthase kinase-3 OS=Caenorhabditis elegans OX=6239 GN=gsk-3 PE=1 SV=1	1	2	2	6.1	40.882	362	6.1	0	26920000	0
Q9XWT3	CAEEL Uterine Lumin Expressed/locailized	ule-5	tr|Q9XWT3|Q9XWT3_CAEEL Uterine Lumin Expressed/locailized OS=Caenorhabditis elegans OX=6239 GN=ule-5 PE=1 SV=1	1	2	2	13.3	19.533	181	13.3	6.6	127230000	46200000
Q9XXK1	CAEEL ATP synthase subunit alpha, mitochondrial	atp-1	sp|Q9XXK1|ATPA_CAEEL ATP synthase subunit alpha, mitochondrial OS=Caenorhabditis elegans OX=6239 GN=atp-1 PE=1 SV=1	1	2	2	4.8	57.787	538	4.8	0	60428000	0
H9G2V3;A0A061ACJ8;A0A061AKQ5;A0A061AJ06;A0A061ADU4;H9G2V2;A0A061ACM9;A0A061ACJ2;A0A061ADT8;A0A061ACM4;A0A061AKP8;Q23658	CAEEL Calcium-dependent secretion activator	unc-31	tr|H9G2V3|H9G2V3_CAEEL Calcium-dependent secretion activator OS=Caenorhabditis elegans OX=6239 GN=unc-31 PE=1 SV=1;tr|A0A061ACJ8|A0A061ACJ8_CAEEL Calcium-dependent secretion activator OS=Caenorhabditis elegans OX=6239 GN=unc-31 PE=1 SV=1;tr|A0A061AKQ5|A0A0	12	1	1	0.8	154.84	1366	0.8	0.8	21077000	509670000
K8FDX2;A0A0K3AWP0;A0A0K3AUC2;A0A0K3ATS1;A0A0K3ARC0;A0A0K3AQT4;Q22866	CAEEL Uncharacterized protein	lev-11	tr|K8FDX2|K8FDX2_CAEEL Uncharacterized protein OS=Caenorhabditis elegans OX=6239 GN=lev-11 PE=1 SV=1;tr|A0A0K3AWP0|A0A0K3AWP0_CAEEL Uncharacterized protein OS=Caenorhabditis elegans OX=6239 GN=lev-11 PE=1 SV=1;tr|A0A0K3AUC2|A0A0K3AUC2_CAEEL Uncharacterized	7	1	1	3.9	33.004	284	3.9	0	0	0
A0A0K3AUF2;A0A0K3AQW3	CAEEL Uncharacterized protein	B0432.7	tr|A0A0K3AUF2|A0A0K3AUF2_CAEEL Uncharacterized protein OS=Caenorhabditis elegans OX=6239 GN=B0432.7 PE=1 SV=1;tr|A0A0K3AQW3|A0A0K3AQW3_CAEEL Uncharacterized protein OS=Caenorhabditis elegans OX=6239 GN=B0432.7 PE=1 SV=1	2	1	1	0.9	98.833	871	0.9	0	1675100	0
A0A0K3AXL9;A0A0K3AVC3	CAEEL Uncharacterized protein	C05E4.15	tr|A0A0K3AXL9|A0A0K3AXL9_CAEEL Uncharacterized protein OS=Caenorhabditis elegans OX=6239 GN=C05E4.15 PE=4 SV=1;tr|A0A0K3AVC3|A0A0K3AVC3_CAEEL Uncharacterized protein OS=Caenorhabditis elegans OX=6239 GN=C05E4.15 PE=4 SV=1	2	1	1	4.2	28.058	239	4.2	0	5824700	0
A0A0M9JJ85;A0A0M7RDU5;H2L075;Q8MXD8;Q9NL87;Q5PY59;V6CLU5;V6CKH1;V6CLT3;V6CLU0;V6CJB8;V6CLP5	CAEEL KETtiN (Drosophila actin-binding) homolog	ketn-1	tr|A0A0M9JJ85|A0A0M9JJ85_CAEEL KETtiN (Drosophila actin-binding) homolog OS=Caenorhabditis elegans OX=6239 GN=ketn-1 PE=1 SV=1;tr|A0A0M7RDU5|A0A0M7RDU5_CAEEL KETtiN (Drosophila actin-binding) homolog OS=Caenorhabditis elegans OX=6239 GN=ketn-1 PE=1 SV=1;tr	12	1	1	0.3	362.3	3260	0.3	0	2987900	0
A0A131MBB1;A0A131MC76;A0A131MAQ8;A0A131MAV3	CAEEL Histone acetyltransferase	mys-2	tr|A0A131MBB1|A0A131MBB1_CAEEL Histone acetyltransferase OS=Caenorhabditis elegans OX=6239 GN=mys-2 PE=1 SV=1;tr|A0A131MC76|A0A131MC76_CAEEL Histone acetyltransferase OS=Caenorhabditis elegans OX=6239 GN=mys-2 PE=1 SV=1;tr|A0A131MAQ8|A0A131MAQ8_CAEEL Histo	4	1	1	5.5	19.088	163	5.5	0	27263000	0
A0A1N7SYP7;A0A1N7SYR1;A0A1N7SYP6;Q95QW0	CAEEL Eukaryotic translation initiation factor 3 subunit L	eif-3.l	tr|A0A1N7SYP7|A0A1N7SYP7_CAEEL Eukaryotic translation initiation factor 3 subunit L OS=Caenorhabditis elegans OX=6239 GN=eif-3.l PE=1 SV=1;tr|A0A1N7SYR1|A0A1N7SYR1_CAEEL Eukaryotic translation initiation factor 3 subunit L OS=Caenorhabditis elegans OX=6239	4	1	1	1.8	57.235	492	1.8	1.8	58136000	95856000
A0A1X7RC97	CAEEL Uncharacterized protein	CELE_T21F4.1	tr|A0A1X7RC97|A0A1X7RC97_CAEEL Uncharacterized protein OS=Caenorhabditis elegans OX=6239 GN=CELE_T21F4.1 PE=1 SV=1	1	1	1	2.8	35.953	327	2.8	2.8	0	33340000
A0A2K5AU02;A0A2K5ATZ5	CAEEL G_PROTEIN_RECEP_F1_2 domain-containing protein	aexr-1	tr|A0A2K5AU02|A0A2K5AU02_CAEEL G_PROTEIN_RECEP_F1_2 domain-containing protein OS=Caenorhabditis elegans OX=6239 GN=aexr-1 PE=4 SV=1;tr|A0A2K5ATZ5|A0A2K5ATZ5_CAEEL G_PROTEIN_RECEP_F1_2 domain-containing protein OS=Caenorhabditis elegans OX=6239 GN=aexr-1 PE	2	1	1	2.8	48.128	422	2.8	0	5991000	0
A0A2R8F5A8	CAEEL Uncharacterized protein	CELE_F53G2.12	tr|A0A2R8F5A8|A0A2R8F5A8_CAEEL Uncharacterized protein OS=Caenorhabditis elegans OX=6239 GN=CELE_F53G2.12 PE=3 SV=1	1	1	1	10	10.771	90	10	0	12131000	0
A0A3P6N643;Q17413	CAEEL PRK domain-containing protein	B0001.4	tr|A0A3P6N643|A0A3P6N643_CAEEL PRK domain-containing protein OS=Caenorhabditis elegans OX=6239 GN=B0001.4 PE=1 SV=1;sp|Q17413|UCK_CAEEL Probable uridine-cytidine kinase OS=Caenorhabditis elegans OX=6239 GN=B0001.4 PE=3 SV=2	2	1	1	4.5	25.434	222	4.5	0	4712800	0
A0A3P6P9B9;A0A3P6NPD2;H8ESF4;A0A3P6NNV9;G5EF87;H8ESF3	CAEEL SANT domain-containing protein	swsn-1	tr|A0A3P6P9B9|A0A3P6P9B9_CAEEL SANT domain-containing protein OS=Caenorhabditis elegans OX=6239 GN=swsn-1 PE=1 SV=1;tr|A0A3P6NPD2|A0A3P6NPD2_CAEEL SANT domain-containing protein OS=Caenorhabditis elegans OX=6239 GN=swsn-1 PE=1 SV=1;tr|H8ESF4|H8ESF4_CAEEL S	6	1	1	1.9	55.553	519	1.9	1.9	0	36097000
Q21541;A0A486WUL5	CAEEL AD domain-containing protein	CELE_M142.5	tr|Q21541|Q21541_CAEEL AD domain-containing protein OS=Caenorhabditis elegans OX=6239 GN=CELE_M142.5 PE=1 SV=2;tr|A0A486WUL5|A0A486WUL5_CAEEL AD domain-containing protein OS=Caenorhabditis elegans OX=6239 GN=CELE_M142.5 PE=1 SV=1	2	1	1	3.8	22.956	209	3.8	0	6458200	0
H2L0N9;A0A486WV52;Q6AW03;A0A486WWC6	CAEEL Uncharacterized protein	CELE_Y37E3.17	tr|H2L0N9|H2L0N9_CAEEL Uncharacterized protein OS=Caenorhabditis elegans OX=6239 GN=CELE_Y37E3.17 PE=1 SV=1;tr|A0A486WV52|A0A486WV52_CAEEL Uncharacterized protein OS=Caenorhabditis elegans OX=6239 GN=CELE_Y37E3.17 PE=1 SV=1;tr|Q6AW03|Q6AW03_CAEEL Uncharact	4	1	1	0.8	91.821	830	0.8	0.8	78783000	27361000
Q9GRY9;A0A4V0ILI5	CAEEL KH domain-containing protein	nova-1	tr|Q9GRY9|Q9GRY9_CAEEL KH domain-containing protein OS=Caenorhabditis elegans OX=6239 GN=nova-1 PE=1 SV=1;tr|A0A4V0ILI5|A0A4V0ILI5_CAEEL KH domain-containing protein OS=Caenorhabditis elegans OX=6239 GN=nova-1 PE=1 SV=1	2	1	1	2.7	42.115	413	2.7	2.7	5802700	24603000
A5HU89;Q65ZK0;Q19825	CAEEL Probable arginine--tRNA ligase, cytoplasmic	rars-1	tr|A5HU89|A5HU89_CAEEL Probable arginine--tRNA ligase, cytoplasmic OS=Caenorhabditis elegans OX=6239 GN=rars-1 PE=1 SV=1;tr|Q65ZK0|Q65ZK0_CAEEL Probable arginine--tRNA ligase, cytoplasmic OS=Caenorhabditis elegans OX=6239 GN=rars-1 PE=1 SV=1;sp|Q19825|SYRC	3	1	1	15.7	11.642	108	15.7	15.7	15448000	0
A5JVN7	CAEEL LAD-2 short isoform	lad-2	tr|A5JVN7|A5JVN7_CAEEL LAD-2 short isoform OS=Caenorhabditis elegans OX=6239 GN=lad-2 PE=2 SV=1	1	1	1	1.8	56.31	500	1.8	0	9891200	0
Q9U207;A5PEX6;G2HK02;K8ESL3;G2HK03	CAEEL MATH domain-containing protein	pqn-87	tr|Q9U207|Q9U207_CAEEL MATH domain-containing protein OS=Caenorhabditis elegans OX=6239 GN=pqn-87 PE=1 SV=3;tr|A5PEX6|A5PEX6_CAEEL MATH domain-containing protein OS=Caenorhabditis elegans OX=6239 GN=pqn-87 PE=1 SV=1;tr|G2HK02|G2HK02_CAEEL MATH domain-conta	5	1	1	1	160.97	1456	1	0	0	0
A7DT45	CAEEL Uncharacterized protein	oxy-5	tr|A7DT45|A7DT45_CAEEL Uncharacterized protein OS=Caenorhabditis elegans OX=6239 GN=oxy-5 PE=1 SV=1	1	1	1	10.5	17.864	162	10.5	0	5995300	0
A8WI68;Q9XU13;G5EEK8	CAEEL Calcium-transporting ATPase	sca-1	tr|A8WI68|A8WI68_CAEEL Calcium-transporting ATPase OS=Caenorhabditis elegans OX=6239 GN=sca-1 PE=1 SV=1;tr|Q9XU13|Q9XU13_CAEEL Calcium-transporting ATPase OS=Caenorhabditis elegans OX=6239 GN=sca-1 PE=1 SV=1;tr|G5EEK8|G5EEK8_CAEEL Calcium-transporting ATPa	3	1	1	1.3	101.26	932	1.3	0	6324200	0
Q18494;A9UJN7;P91859	CAEEL Microtubule-Associated Protein Homolog	maph-1.3	tr|Q18494|Q18494_CAEEL Microtubule-Associated Protein Homolog OS=Caenorhabditis elegans OX=6239 GN=maph-1.3 PE=1 SV=2;tr|A9UJN7|A9UJN7_CAEEL Microtubule-Associated Protein Homolog OS=Caenorhabditis elegans OX=6239 GN=maph-1.2 PE=1 SV=1;sp|P91859|MAP11_CAEE	3	1	1	0.9	91.994	874	0.9	0	65135000	0
B1Q255;B1Q254	CAEEL Uncharacterized protein	C14H10.3	tr|B1Q255|B1Q255_CAEEL Uncharacterized protein OS=Caenorhabditis elegans OX=6239 GN=C14H10.3 PE=1 SV=1;tr|B1Q254|B1Q254_CAEEL Uncharacterized protein OS=Caenorhabditis elegans OX=6239 GN=C14H10.3 PE=1 SV=1	2	1	1	1.2	81.826	734	1.2	0	7101400	0
B3CJ34	CAEEL TOG domain-containing protein	gcn-1	tr|B3CJ34|B3CJ34_CAEEL TOG domain-containing protein OS=Caenorhabditis elegans OX=6239 GN=gcn-1 PE=1 SV=2	1	1	1	0.4	291.6	2651	0.4	0	9662600	0
G8JY79;B6EU49;P53014	CAEEL EF-hand domain-containing protein	mlc-3	tr|G8JY79|G8JY79_CAEEL EF-hand domain-containing protein OS=Caenorhabditis elegans OX=6239 GN=mlc-3 PE=1 SV=1;tr|B6EU49|B6EU49_CAEEL Alkali myosin light chain long isoform OS=Caenorhabditis elegans OX=6239 GN=mlc-3 PE=4 SV=1;sp|P53014|MLE_CAEEL Myosin, ess	3	1	1	12.2	10.25	90	12.2	0	22433000	0
C6KRI9;X5M900;Q22847;X5M5W2	CAEEL Uncharacterized protein	CELE_T28C6.7	tr|C6KRI9|C6KRI9_CAEEL Uncharacterized protein OS=Caenorhabditis elegans OX=6239 GN=CELE_T28C6.7 PE=1 SV=1;tr|X5M900|X5M900_CAEEL Uncharacterized protein OS=Caenorhabditis elegans OX=6239 GN=CELE_T28C6.7 PE=1 SV=1;tr|Q22847|Q22847_CAEEL Uncharacterized pro	4	1	1	0.9	264.16	2300	0.9	0	3415900	0
D7SFP5;O02335;C6KRN3	CAEEL Protein YIPF	CELE_W02D9.2	tr|D7SFP5|D7SFP5_CAEEL Protein YIPF OS=Caenorhabditis elegans OX=6239 GN=CELE_W02D9.2 PE=1 SV=1;tr|O02335|O02335_CAEEL Protein YIPF OS=Caenorhabditis elegans OX=6239 GN=CELE_W02D9.2 PE=1 SV=2;tr|C6KRN3|C6KRN3_CAEEL Protein YIPF OS=Caenorhabditis elegans OX	3	1	1	3.7	23.677	215	3.7	0	1756900	0
D0IMZ6;U4PR97;U4PM09;U4PEE8;U4PRA0;U4PM04;U4PBK4;U4PB58;U4PEF1;D0IMZ7;U4PEE3;D0IMZ8;U4PB53;D0IMZ5;U4PR92;U4PM01;U4PBJ9	CAEEL FiLamiN (Actin binding protein) homolog	fln-1	tr|D0IMZ6|D0IMZ6_CAEEL FiLamiN (Actin binding protein) homolog OS=Caenorhabditis elegans OX=6239 GN=fln-1 PE=1 SV=1;tr|U4PR97|U4PR97_CAEEL Calponin-homology (CH) domain-containing protein OS=Caenorhabditis elegans OX=6239 GN=fln-1 PE=1 SV=1;tr|U4PM09|U4PM0	17	1	1	1.8	89.307	836	1.8	0	0	0
D1MN68;P17343	CAEEL WD_REPEATS_REGION domain-containing protein	gpb-1	tr|D1MN68|D1MN68_CAEEL WD_REPEATS_REGION domain-containing protein OS=Caenorhabditis elegans OX=6239 GN=gpb-1 PE=1 SV=1;sp|P17343|GBB1_CAEEL Guanine nucleotide-binding protein subunit beta-1 OS=Caenorhabditis elegans OX=6239 GN=gpb-1 PE=1 SV=2	2	1	1	7.8	16.732	153	7.8	0	3391900	0
E1B6S4;Q9BI97	CAEEL Uncharacterized protein	CELE_F17C11.11	tr|E1B6S4|E1B6S4_CAEEL Uncharacterized protein OS=Caenorhabditis elegans OX=6239 GN=CELE_F17C11.11 PE=1 SV=1;tr|Q9BI97|Q9BI97_CAEEL Uncharacterized protein OS=Caenorhabditis elegans OX=6239 GN=CELE_F17C11.11 PE=1 SV=1	2	1	1	7.8	29.219	244	7.8	0	30740000	0
E1NZ09	CAEEL GLoBin related	glb-29	tr|E1NZ09|E1NZ09_CAEEL GLoBin related OS=Caenorhabditis elegans OX=6239 GN=glb-29 PE=4 SV=1	1	1	1	5.6	26.349	231	5.6	0	39888000	0
E2JL06;P91917	CAEEL YchF-GTPase_C domain-containing protein	ola-1	tr|E2JL06|E2JL06_CAEEL YchF-GTPase_C domain-containing protein OS=Caenorhabditis elegans OX=6239 GN=ola-1 PE=1 SV=1;sp|P91917|OLA1_CAEEL Obg-like ATPase 1 OS=Caenorhabditis elegans OX=6239 GN=ola-1 PE=3 SV=1	2	1	1	8	13.951	125	8	0	2685600	0
F5GUH0;F5GUG9;F5GUG8;F5GUG7;F5GUG6;F5GUH2	CAEEL Uncharacterized protein	CELE_W05B5.1	tr|F5GUH0|F5GUH0_CAEEL Uncharacterized protein OS=Caenorhabditis elegans OX=6239 GN=CELE_W05B5.1 PE=1 SV=1;tr|F5GUG9|F5GUG9_CAEEL Uncharacterized protein OS=Caenorhabditis elegans OX=6239 GN=CELE_W05B5.1 PE=1 SV=1;tr|F5GUG8|F5GUG8_CAEEL Uncharacterized pro	6	1	1	8	14.197	125	8	0	0	0
G1K0V8;Q20751;P34563	CAEEL Eukaryotic translation initiation factor 5A	iff-1	tr|G1K0V8|G1K0V8_CAEEL Eukaryotic translation initiation factor 5A OS=Caenorhabditis elegans OX=6239 GN=iff-1 PE=1 SV=1;sp|Q20751|IF5A2_CAEEL Eukaryotic translation initiation factor 5A-2 OS=Caenorhabditis elegans OX=6239 GN=iff-2 PE=2 SV=1;sp|P34563|IF5A1	3	1	1	5	17.867	161	5	5	213580000	688830000
G3MU81;O45624;G3MU79;N1NVB4;G3MU82;G3MU80;O45623;N1NTD2;N1NTI7;G3MU83;N1NTJ2;N1NSE3;N1NV07;N1NSD8;N1NTD8;Q7JKC3	CAEEL Ubiquitin carboxyl-terminal hydrolase	math-33	tr|G3MU81|G3MU81_CAEEL Ubiquitin carboxyl-terminal hydrolase OS=Caenorhabditis elegans OX=6239 GN=math-33 PE=1 SV=1;tr|O45624|O45624_CAEEL Ubiquitin carboxyl-terminal hydrolase OS=Caenorhabditis elegans OX=6239 GN=math-33 PE=1 SV=1;tr|G3MU79|G3MU79_CAEEL U	16	1	1	1	130.95	1129	1	1	19794000	108500000
G5ECY7;G4SJU0	CAEEL Calponin-homology (CH) domain-containing protein	CELE_T15B12.1	tr|G5ECY7|G5ECY7_CAEEL Calponin-homology (CH) domain-containing protein OS=Caenorhabditis elegans OX=6239 GN=CELE_T15B12.1 PE=1 SV=1;tr|G4SJU0|G4SJU0_CAEEL Calponin-homology (CH) domain-containing protein OS=Caenorhabditis elegans OX=6239 GN=CELE_T15B12.1	2	1	1	5.4	25.151	222	5.4	0	0	0
G5EF46;G5EBT9	CAEEL Peptidase_M28 domain-containing protein	CELE_H27A22.1	tr|G5EF46|G5EF46_CAEEL Peptidase_M28 domain-containing protein OS=Caenorhabditis elegans OX=6239 GN=CELE_H27A22.1 PE=1 SV=1;tr|G5EBT9|G5EBT9_CAEEL Peptidase_M28 domain-containing protein OS=Caenorhabditis elegans OX=6239 GN=CELE_H27A22.1 PE=1 SV=1	2	1	1	2.6	38.518	342	2.6	0	18422000	0
G5EBW5	CAEEL FErroChelatase-Like	fecl-1	tr|G5EBW5|G5EBW5_CAEEL FErroChelatase-Like OS=Caenorhabditis elegans OX=6239 GN=fecl-1 PE=1 SV=1	1	1	1	3.7	42.679	374	3.7	0	2207000	0
G5EC23	CAEEL HCF1 related	hcf-1	tr|G5EC23|G5EC23_CAEEL HCF1 related OS=Caenorhabditis elegans OX=6239 GN=hcf-1 PE=1 SV=1	1	1	1	1.4	87.358	782	1.4	0	12675000	0
G5EC71	CAEEL Glutathione S-Transferase	gst-20	tr|G5EC71|G5EC71_CAEEL Glutathione S-Transferase OS=Caenorhabditis elegans OX=6239 GN=gst-20 PE=1 SV=1	1	1	1	5.8	23.787	207	5.8	0	13747000	0
Q0MRC5;G5ECI9	CAEEL UNC-79	unc-79	tr|Q0MRC5|Q0MRC5_CAEEL UNC-79 OS=Caenorhabditis elegans OX=6239 GN=unc-79 PE=2 SV=1;tr|G5ECI9|G5ECI9_CAEEL Uncoordinated protein 79 OS=Caenorhabditis elegans OX=6239 GN=unc-79 PE=4 SV=1	2	1	1	0.7	235.14	2084	0.7	0	0	0
O45246;G5ECU5	CAEEL Heat Shock Protein	hsp-70	tr|O45246|O45246_CAEEL Heat Shock Protein OS=Caenorhabditis elegans OX=6239 GN=hsp-70 PE=1 SV=1;tr|G5ECU5|G5ECU5_CAEEL Uncharacterized protein OS=Caenorhabditis elegans OX=6239 GN=CELE_F44E5.4 PE=1 SV=1	2	2	1	4.5	70.438	643	2.5	2	13184000	0
G5ED41	CAEEL Cullin-associated NEDD8-dissociated protein 1	cand-1	sp|G5ED41|CAND1_CAEEL Cullin-associated NEDD8-dissociated protein 1 OS=Caenorhabditis elegans OX=6239 GN=cand-1 PE=1 SV=1	1	1	1	1	141.72	1274	1	0	0	0
G5EDF7	CAEEL Dual specificity mitogen-activated protein kinase kinase sek-1	sek-1	sp|G5EDF7|SEK1_CAEEL Dual specificity mitogen-activated protein kinase kinase sek-1 OS=Caenorhabditis elegans OX=6239 GN=sek-1 PE=1 SV=1	1	1	1	2.7	38.7	336	2.7	2.7	0	79845000
G5EDJ3	CAEEL Equilibrative Nucleoside Transporter	ent-1	tr|G5EDJ3|G5EDJ3_CAEEL Equilibrative Nucleoside Transporter OS=Caenorhabditis elegans OX=6239 GN=ent-1 PE=1 SV=1	1	1	1	2.5	50.029	445	2.5	0	8450800	0
G5EDP2	CAEEL Non-specific lipid-transfer protein-like 2	daf-22	sp|G5EDP2|NLTP2_CAEEL Non-specific lipid-transfer protein-like 2 OS=Caenorhabditis elegans OX=6239 GN=daf-22 PE=1 SV=1	1	1	1	2.7	44.386	412	2.7	0	1906000	0
G5EDY2	CAEEL Tryptophanyl(W) Amino-acyl tRNA Synthetase	wars-1	tr|G5EDY2|G5EDY2_CAEEL Tryptophanyl(W) Amino-acyl tRNA Synthetase OS=Caenorhabditis elegans OX=6239 GN=wars-1 PE=1 SV=1	1	1	1	1.9	47.238	417	1.9	1.9	111960000	56684000
G5EDZ2	CAEEL Uridine 5-monophosphate synthase	umps-1	sp|G5EDZ2|UMPS_CAEEL Uridine 5-monophosphate synthase OS=Caenorhabditis elegans OX=6239 GN=umps-1 PE=1 SV=1	1	1	1	2.6	54.804	497	2.6	0	3144300	0
G5EE11	CAEEL GCV_T domain-containing protein	CELE_F39H2.3	tr|G5EE11|G5EE11_CAEEL GCV_T domain-containing protein OS=Caenorhabditis elegans OX=6239 GN=CELE_F39H2.3 PE=1 SV=1	1	1	1	5	31.355	280	5	0	1786200	0
G5EE42	CAEEL N-acetyltransferase domain-containing protein	CELE_ZK1098.11	tr|G5EE42|G5EE42_CAEEL N-acetyltransferase domain-containing protein OS=Caenorhabditis elegans OX=6239 GN=CELE_ZK1098.11 PE=1 SV=1	1	1	1	12	11.561	100	12	0	11024000	0
G5EED5	CAEEL Secretory carrier-associated membrane protein	scm-1	tr|G5EED5|G5EED5_CAEEL Secretory carrier-associated membrane protein OS=Caenorhabditis elegans OX=6239 GN=scm-1 PE=1 SV=1	1	1	1	6	36.859	335	6	0	19906000	0
G5EEI4	CAEEL Aspartic protease 1	asp-1	sp|G5EEI4|ASP1_CAEEL Aspartic protease 1 OS=Caenorhabditis elegans OX=6239 GN=asp-1 PE=1 SV=1	1	1	1	3.5	42.692	396	3.5	0	6488600	0
G5EET8	CAEEL PUD1_2 domain-containing protein	pud-1.2	tr|G5EET8|G5EET8_CAEEL PUD1_2 domain-containing protein OS=Caenorhabditis elegans OX=6239 GN=pud-1.2 PE=1 SV=1	1	1	1	7.3	17.184	151	7.3	7.3	10882000	14117000
G5EF37	CAEEL Paralysed Arrest at Two-fold	pat-10	tr|G5EF37|G5EF37_CAEEL Paralysed Arrest at Two-fold OS=Caenorhabditis elegans OX=6239 GN=pat-10 PE=1 SV=1	1	1	1	13	18.516	161	13	0	5486400	0
I7F493;G5EFC1	CAEEL Rab-8 (Fragment)	rab-8	tr|I7F493|I7F493_CAEEL Rab-8 (Fragment) OS=Caenorhabditis elegans OX=6239 GN=rab-8 PE=2 SV=1;tr|G5EFC1|G5EFC1_CAEEL RAB family OS=Caenorhabditis elegans OX=6239 GN=rab-8 PE=1 SV=1	2	1	1	4.8	23.891	210	4.8	4.8	18756000	33638000
Q17340;G5EFG4	CAEEL ABC transporter domain-containing protein (Fragment)		tr|Q17340|Q17340_CAEEL ABC transporter domain-containing protein (Fragment) OS=Caenorhabditis elegans OX=6239 PE=2 SV=1;tr|G5EFG4|G5EFG4_CAEEL ABC transporter, class F OS=Caenorhabditis elegans OX=6239 GN=abcf-2 PE=1 SV=1	2	1	1	2.1	61.085	535	2.1	0	120400000	0
G5EGJ4;G5EG90	CAEEL F-box C protein	fbxc-5	tr|G5EGJ4|G5EGJ4_CAEEL F-box C protein OS=Caenorhabditis elegans OX=6239 GN=fbxc-5 PE=4 SV=1;tr|G5EG90|G5EG90_CAEEL F-box C protein OS=Caenorhabditis elegans OX=6239 GN=fbxc-2 PE=4 SV=1	2	1	1	2.7	43.754	375	2.7	0	0	0
G5EGK8	CAEEL Serine/threonine-protein phosphatase 2A catalytic subunit	let-92	sp|G5EGK8|PP2A_CAEEL Serine/threonine-protein phosphatase 2A catalytic subunit OS=Caenorhabditis elegans OX=6239 GN=let-92 PE=1 SV=1	1	1	1	3.8	36.302	318	3.8	3.8	10473000	8766400
G5EGT7	CAEEL Eukaryotic translation initiation factor eIF5B	iffb-1	tr|G5EGT7|G5EGT7_CAEEL Eukaryotic translation initiation factor eIF5B OS=Caenorhabditis elegans OX=6239 GN=iffb-1 PE=1 SV=1	1	1	1	1	120.42	1074	0	1	0	0
G8JY43;P46550	CAEEL T-complex protein 1 subunit zeta	cct-6	tr|G8JY43|G8JY43_CAEEL T-complex protein 1 subunit zeta OS=Caenorhabditis elegans OX=6239 GN=cct-6 PE=1 SV=1;sp|P46550|TCPZ_CAEEL T-complex protein 1 subunit zeta OS=Caenorhabditis elegans OX=6239 GN=cct-6 PE=1 SV=1	2	1	1	2.1	47.67	429	2.1	2.1	43295000	65897000
H2L001;Q2L6Y6	CAEEL HATPase_c domain-containing protein	hsp-75	tr|H2L001|H2L001_CAEEL HATPase_c domain-containing protein OS=Caenorhabditis elegans OX=6239 GN=hsp-75 PE=1 SV=1;tr|Q2L6Y6|Q2L6Y6_CAEEL HATPase_c domain-containing protein OS=Caenorhabditis elegans OX=6239 GN=hsp-75 PE=1 SV=1	2	1	1	2.5	54.273	479	2.5	0	0	0
H2L023;Q95YA9	CAEEL Adenylyl cyclase-associated protein	cas-1	tr|H2L023|H2L023_CAEEL Adenylyl cyclase-associated protein OS=Caenorhabditis elegans OX=6239 GN=cas-1 PE=1 SV=1;tr|Q95YA9|Q95YA9_CAEEL Adenylyl cyclase-associated protein OS=Caenorhabditis elegans OX=6239 GN=cas-1 PE=1 SV=2	2	1	1	2	53.017	495	2	0	4198700	0
Q9GZI3;H2L0M0	CAEEL Uncharacterized protein	pod-2	tr|Q9GZI3|Q9GZI3_CAEEL Uncharacterized protein OS=Caenorhabditis elegans OX=6239 GN=pod-2 PE=1 SV=1;tr|H2L0M0|H2L0M0_CAEEL Uncharacterized protein OS=Caenorhabditis elegans OX=6239 GN=pod-2 PE=1 SV=1	2	1	1	0.5	230.57	2054	0.5	0.5	24393000	6627000
Q17409;O18688;H2L2E8;P34690	CAEEL Tubulin alpha chain	tba-1	tr|Q17409|Q17409_CAEEL Tubulin alpha chain OS=Caenorhabditis elegans OX=6239 GN=tba-1 PE=3 SV=1;tr|O18688|O18688_CAEEL Tubulin alpha chain OS=Caenorhabditis elegans OX=6239 GN=tba-1 PE=1 SV=1;tr|H2L2E8|H2L2E8_CAEEL Tubulin alpha chain OS=Caenorhabditis ele	4	3	1	6	50.025	449	6	2	414840000	389550000
Q27485;J7S164;J7SA65;P09588	CAEEL Histone H2A	his-35	tr|Q27485|Q27485_CAEEL Histone H2A OS=Caenorhabditis elegans OX=6239 GN=his-35 PE=3 SV=1;tr|J7S164|J7S164_CAEEL Histone H2A OS=Caenorhabditis elegans OX=6239 GN=his-57 PE=3 SV=1;tr|J7SA65|J7SA65_CAEEL Histone H2A OS=Caenorhabditis elegans OX=6239 GN=his-57	4	1	1	5.5	13.418	127	0	5.5	0	268570000
V6CJV7;L8E6W1;Q9BMN8	CAEEL Protein-tyrosine-phosphatase	ptp-3	tr|V6CJV7|V6CJV7_CAEEL Protein-tyrosine-phosphatase OS=Caenorhabditis elegans OX=6239 GN=ptp-3 PE=1 SV=1;tr|L8E6W1|L8E6W1_CAEEL Protein-tyrosine-phosphatase OS=Caenorhabditis elegans OX=6239 GN=ptp-3 PE=1 SV=1;sp|Q9BMN8|LAR_CAEEL Tyrosine-protein phosphata	3	1	1	0.6	246.62	2200	0.6	0	4085500	0
N1NVC4;Q21217	CAEEL Probable 4-aminobutyrate aminotransferase, mitochondrial	gta-1	tr|N1NVC4|N1NVC4_CAEEL Probable 4-aminobutyrate aminotransferase, mitochondrial OS=Caenorhabditis elegans OX=6239 GN=gta-1 PE=1 SV=1;sp|Q21217|GABT_CAEEL Probable 4-aminobutyrate aminotransferase, mitochondrial OS=Caenorhabditis elegans OX=6239 GN=gta-1 PE	2	1	1	3.2	37.709	339	3.2	0	14703000	0
O01504	CAEEL 60S acidic ribosomal protein P2	C37A2.7	sp|O01504|RLA2_CAEEL 60S acidic ribosomal protein P2 OS=Caenorhabditis elegans OX=6239 GN=C37A2.7 PE=3 SV=2	1	1	1	21.5	10.813	107	21.5	0	52623000	0
O01542	CAEEL Calponin-homology (CH) domain-containing protein	cpn-3	tr|O01542|O01542_CAEEL Calponin-homology (CH) domain-containing protein OS=Caenorhabditis elegans OX=6239 GN=cpn-3 PE=1 SV=1	1	1	1	8.5	15.509	142	8.5	0	58457000	0
O01692	CAEEL 40S ribosomal protein S17	rps-17	sp|O01692|RS17_CAEEL 40S ribosomal protein S17 OS=Caenorhabditis elegans OX=6239 GN=rps-17 PE=3 SV=2	1	1	1	7.7	14.938	130	7.7	0	9587400	0
O01733	CAEEL Protein kinase domain-containing protein	C09D4.3	tr|O01733|O01733_CAEEL Protein kinase domain-containing protein OS=Caenorhabditis elegans OX=6239 GN=C09D4.3 PE=4 SV=2	1	1	1	4.2	47.002	406	4.2	0	46425000	0
O45518;O45011;O01854	CAEEL ARGinine Kinase	argk-1	tr|O45518|O45518_CAEEL ARGinine Kinase OS=Caenorhabditis elegans OX=6239 GN=argk-1 PE=1 SV=1;tr|O45011|O45011_CAEEL Uncharacterized protein OS=Caenorhabditis elegans OX=6239 GN=CELE_W10C8.5 PE=1 SV=1;tr|O01854|O01854_CAEEL Uncharacterized protein OS=Caenor	3	1	1	2.7	42.145	372	2.7	0	23219000	0
O01869	CAEEL S10_plectin domain-containing protein	rps-10	tr|O01869|O01869_CAEEL S10_plectin domain-containing protein OS=Caenorhabditis elegans OX=6239 GN=rps-10 PE=1 SV=1	1	1	1	8.7	16.87	149	8.7	0	10903000	0
O02056	CAEEL 60S ribosomal protein L4	rpl-4	sp|O02056|RL4_CAEEL 60S ribosomal protein L4 OS=Caenorhabditis elegans OX=6239 GN=rpl-4 PE=1 SV=3	1	1	1	2.6	38.659	345	2.6	0	11254000	0
O02082	CAEEL Uncharacterized protein	C48E7.1	tr|O02082|O02082_CAEEL Uncharacterized protein OS=Caenorhabditis elegans OX=6239 GN=C48E7.1 PE=1 SV=1	1	1	1	6.3	18.676	174	6.3	0	10867000	0
O02328	CAEEL Eukaryotic translation initiation factor 3 subunit C	eif-3.C	sp|O02328|EIF3C_CAEEL Eukaryotic translation initiation factor 3 subunit C OS=Caenorhabditis elegans OX=6239 GN=eif-3.C PE=3 SV=2	1	1	1	0.9	103.84	898	0.9	0	5334300	0
O02485	CAEEL Uncharacterized protein ZK1073.1	ZK1073.1	sp|O02485|YDJ1_CAEEL Uncharacterized protein ZK1073.1 OS=Caenorhabditis elegans OX=6239 GN=ZK1073.1 PE=3 SV=1	1	1	1	3.1	35.591	325	3.1	0	7882700	0
O02640	CAEEL Probable malate dehydrogenase, mitochondrial	mdh-2	sp|O02640|MDHM_CAEEL Probable malate dehydrogenase, mitochondrial OS=Caenorhabditis elegans OX=6239 GN=mdh-2 PE=3 SV=1	1	1	1	3.5	35.119	341	3.5	0	22694000	0
O16336	CAEEL Seven TM Receptor	str-130	tr|O16336|O16336_CAEEL Seven TM Receptor OS=Caenorhabditis elegans OX=6239 GN=str-130 PE=4 SV=1	1	1	1	3.6	38.543	338	3.6	0	11026000	0
O16517	CAEEL ATP synthase subunit	atp-4	tr|O16517|O16517_CAEEL ATP synthase subunit OS=Caenorhabditis elegans OX=6239 GN=atp-4 PE=1 SV=1	1	1	1	10.1	13.957	129	10.1	0	29280000	0
O17287	CAEEL Mitochondrial import receptor subunit TOM22 homolog	tomm-22	sp|O17287|TOM22_CAEEL Mitochondrial import receptor subunit TOM22 homolog OS=Caenorhabditis elegans OX=6239 GN=tomm-22 PE=3 SV=1	1	1	1	6.4	12.176	109	6.4	0	26173000	0
O17687	CAEEL SHNi-TPR domain-containing protein	nasp-2	tr|O17687|O17687_CAEEL SHNi-TPR domain-containing protein OS=Caenorhabditis elegans OX=6239 GN=nasp-2 PE=1 SV=1	1	1	1	1.7	62.957	582	1.7	0	4394700	0
O17732	CAEEL Pyruvate carboxylase 1	pyc-1	sp|O17732|PYC1_CAEEL Pyruvate carboxylase 1 OS=Caenorhabditis elegans OX=6239 GN=pyc-1 PE=1 SV=1	1	1	1	0.6	129.28	1175	0.6	0	10879000	0
O17915	CAEEL GTP-binding nuclear protein ran-1	ran-1	sp|O17915|RAN_CAEEL GTP-binding nuclear protein ran-1 OS=Caenorhabditis elegans OX=6239 GN=ran-1 PE=1 SV=1	1	1	1	5.1	24.254	215	5.1	0	6941500	0
O17921;Q18817;P12456	CAEEL Tubulin beta chain	tbb-1	tr|O17921|O17921_CAEEL Tubulin beta chain OS=Caenorhabditis elegans OX=6239 GN=tbb-1 PE=1 SV=1;tr|Q18817|Q18817_CAEEL Tubulin beta chain OS=Caenorhabditis elegans OX=6239 GN=ben-1 PE=1 SV=3;sp|P12456|TBB1_CAEEL Tubulin beta-1 chain OS=Caenorhabditis elegan	3	3	1	6.7	50.238	449	6.7	2	5253800	0
O17953	CAEEL Dihydrolipoyl dehydrogenase, mitochondrial	dld-1	sp|O17953|DLDH_CAEEL Dihydrolipoyl dehydrogenase, mitochondrial OS=Caenorhabditis elegans OX=6239 GN=dld-1 PE=3 SV=2	1	1	1	2	52.633	495	2	0	4312800	0
O18240	CAEEL Ribosomal Protein, Small subunit	rps-18	tr|O18240|O18240_CAEEL Ribosomal Protein, Small subunit OS=Caenorhabditis elegans OX=6239 GN=rps-18 PE=1 SV=1	1	1	1	4.5	17.77	154	4.5	0	5227400	0
O44441	CAEEL ATPase inhibitor mai-2, mitochondrial	mai-2	sp|O44441|ATIF2_CAEEL ATPase inhibitor mai-2, mitochondrial OS=Caenorhabditis elegans OX=6239 GN=mai-2 PE=3 SV=1	1	1	1	8.3	12.031	109	8.3	0	23372000	0
O44657	CAEEL CYtochrome P450 family	cyp-34a7	tr|O44657|O44657_CAEEL CYtochrome P450 family OS=Caenorhabditis elegans OX=6239 GN=cyp-34a7 PE=3 SV=1	1	1	1	2.8	56.618	499	2.8	0	4309100	0
O44782	CAEEL Major sperm protein	vpr-1	tr|O44782|O44782_CAEEL Major sperm protein OS=Caenorhabditis elegans OX=6239 GN=vpr-1 PE=1 SV=1	1	1	1	3.7	26.851	245	3.7	3.7	5625800	13393000
O44827	CAEEL Facilitated glucose transporter protein 1	fgt-1	sp|O44827|FGT1_CAEEL Facilitated glucose transporter protein 1 OS=Caenorhabditis elegans OX=6239 GN=fgt-1 PE=1 SV=2	1	1	1	1.8	55.068	510	1.8	0	29520000	0
O45552	CAEEL ACetyl-CoA Acyltransferase 2 homolog	acaa-2	tr|O45552|O45552_CAEEL ACetyl-CoA Acyltransferase 2 homolog OS=Caenorhabditis elegans OX=6239 GN=acaa-2 PE=1 SV=2	1	1	1	2.3	41.29	394	2.3	0	17718000	0
O45574;Q95ZS5	CAEEL Uncharacterized protein	CELE_F56A8.3	tr|O45574|O45574_CAEEL Uncharacterized protein OS=Caenorhabditis elegans OX=6239 GN=CELE_F56A8.3 PE=1 SV=1;tr|Q95ZS5|Q95ZS5_CAEEL Uncharacterized protein OS=Caenorhabditis elegans OX=6239 GN=CELE_F56A8.3 PE=1 SV=1	2	1	1	3.5	28.123	254	3.5	0	9721900	0
O45729	CAEEL Serpentine Receptor, class U	sru-15	tr|O45729|O45729_CAEEL Serpentine Receptor, class U OS=Caenorhabditis elegans OX=6239 GN=sru-15 PE=4 SV=1	1	1	1	4.3	37.892	322	4.3	0	0	0
O45769	CAEEL F-box domain-containing protein	CELE_T10C6.7	tr|O45769|O45769_CAEEL F-box domain-containing protein OS=Caenorhabditis elegans OX=6239 GN=CELE_T10C6.7 PE=4 SV=2	1	1	1	3.8	37.523	317	0	3.8	0	0
O45815	CAEEL ACTin	act-5	tr|O45815|O45815_CAEEL ACTin OS=Caenorhabditis elegans OX=6239 GN=act-5 PE=1 SV=1	1	3	1	8.3	41.872	375	8.3	5.6	6381900	0
O45904;P36573	CAEEL Galectin	lec-1	tr|O45904|O45904_CAEEL Galectin OS=Caenorhabditis elegans OX=6239 GN=lec-1 PE=1 SV=1;sp|P36573|LEC1_CAEEL 32 kDa beta-galactoside-binding lectin OS=Caenorhabditis elegans OX=6239 GN=lec-1 PE=1 SV=1	2	1	1	3.2	32.683	285	3.2	3.2	56958000	62562000
O45933	CAEEL Nucleoporin SEH1	npp-18	sp|O45933|SEH1_CAEEL Nucleoporin SEH1 OS=Caenorhabditis elegans OX=6239 GN=npp-18 PE=3 SV=1	1	1	1	1.9	41.725	363	1.9	0	8793900	0
Q9U3R0;O45941	CAEEL UPF0375 protein C08F11.12	C08F11.12	sp|Q9U3R0|U375B_CAEEL UPF0375 protein C08F11.12 OS=Caenorhabditis elegans OX=6239 GN=C08F11.12 PE=3 SV=1;sp|O45941|U375E_CAEEL UPF0375 protein Y45F10C.2 OS=Caenorhabditis elegans OX=6239 GN=Y45F10C.2 PE=1 SV=1	2	1	1	14.5	12.825	117	14.5	0	23980000	0
O45971;O45972	CAEEL Uncharacterized protein	CELE_Y6E2A.1	tr|O45971|O45971_CAEEL Uncharacterized protein OS=Caenorhabditis elegans OX=6239 GN=CELE_Y6E2A.1 PE=4 SV=1;tr|O45972|O45972_CAEEL Seven TM Receptor OS=Caenorhabditis elegans OX=6239 GN=str-101 PE=4 SV=3	2	1	1	3.3	35.652	307	3.3	3.3	4986200000	25576000
O61521	CAEEL Uncharacterized protein	CELE_F17E9.5	tr|O61521|O61521_CAEEL Uncharacterized protein OS=Caenorhabditis elegans OX=6239 GN=CELE_F17E9.5 PE=1 SV=2	1	1	1	6.2	17.149	162	6.2	0	11208000	0
O61709	CAEEL Uncharacterized protein	CELE_R119.3	tr|O61709|O61709_CAEEL Uncharacterized protein OS=Caenorhabditis elegans OX=6239 GN=CELE_R119.3 PE=1 SV=2	1	1	1	5.1	26.539	253	5.1	0	13904000	0
O61792	CAEEL MPN domain-containing protein	rpn-8	tr|O61792|O61792_CAEEL MPN domain-containing protein OS=Caenorhabditis elegans OX=6239 GN=rpn-8 PE=1 SV=1	1	1	1	2.5	40.687	362	0	2.5	0	0
U4PB05;O62327	CAEEL Glutathione peroxidase	gpx-2	tr|U4PB05|U4PB05_CAEEL Glutathione peroxidase OS=Caenorhabditis elegans OX=6239 GN=gpx-2 PE=1 SV=1;sp|O62327|GPX2_CAEEL Glutathione peroxidase 2 OS=Caenorhabditis elegans OX=6239 GN=gpx-2 PE=3 SV=1	2	1	1	8.4	19.816	179	8.4	0	5173600	0
O62431	CAEEL Probable glutamine--tRNA ligase	qars-1	sp|O62431|SYQ_CAEEL Probable glutamine--tRNA ligase OS=Caenorhabditis elegans OX=6239 GN=qars-1 PE=3 SV=1	1	1	1	1.5	88.261	786	1.5	0	0	0
O76715	CAEEL Uncharacterized protein	CELE_F36H12.5	tr|O76715|O76715_CAEEL Uncharacterized protein OS=Caenorhabditis elegans OX=6239 GN=CELE_F36H12.5 PE=1 SV=1	1	1	1	12.7	22.335	197	12.7	12.7	21964000	3527500
P02567	CAEEL Myosin-1	myo-1	sp|P02567|MYO1_CAEEL Myosin-1 OS=Caenorhabditis elegans OX=6239 GN=myo-1 PE=1 SV=3	1	1	1	0.6	223.32	1938	0.6	0	2579700	0
P06125	CAEEL Vitellogenin-5	vit-5	sp|P06125|VIT5_CAEEL Vitellogenin-5 OS=Caenorhabditis elegans OX=6239 GN=vit-5 PE=2 SV=2	1	13	1	7.2	186.44	1603	7.2	2.1	1068400000	1146400000
P10567	CAEEL Paramyosin	unc-15	sp|P10567|MYSP_CAEEL Paramyosin OS=Caenorhabditis elegans OX=6239 GN=unc-15 PE=1 SV=2	1	1	1	1.3	100.63	872	1.3	0	3749100	0
P11141	CAEEL Heat shock 70 kDa protein F, mitochondrial	hsp-6	sp|P11141|HSP7F_CAEEL Heat shock 70 kDa protein F, mitochondrial OS=Caenorhabditis elegans OX=6239 GN=hsp-6 PE=1 SV=2	1	1	1	1.8	70.844	657	1.8	0	24448000	0
P19626;P19625	CAEEL Myosin regulatory light chain 2	mlc-2	sp|P19626|MLR2_CAEEL Myosin regulatory light chain 2 OS=Caenorhabditis elegans OX=6239 GN=mlc-2 PE=4 SV=1;sp|P19625|MLR1_CAEEL Myosin regulatory light chain 1 OS=Caenorhabditis elegans OX=6239 GN=mlc-1 PE=4 SV=1	2	1	1	6.5	18.603	170	6.5	0	25179000	0
P19826	CAEEL Vinculin	deb-1	sp|P19826|VINC_CAEEL Vinculin OS=Caenorhabditis elegans OX=6239 GN=deb-1 PE=1 SV=2	1	1	1	0.7	120.78	1090	0.7	0.7	0	90303000
P27798	CAEEL Calreticulin	crt-1	sp|P27798|CALR_CAEEL Calreticulin OS=Caenorhabditis elegans OX=6239 GN=crt-1 PE=1 SV=1	1	1	1	2.8	45.616	395	2.8	2.8	0	28934000
P34303	CAEEL Zinc finger transcription factor family protein 30	ztf-30	sp|P34303|ZTF30_CAEEL Zinc finger transcription factor family protein 30 OS=Caenorhabditis elegans OX=6239 GN=ztf-30 PE=4 SV=1	1	1	1	2.8	44.476	397	2.8	0	0	0
P34308	CAEEL Calpain clp-1	clp-1	sp|P34308|CAN_CAEEL Calpain clp-1 OS=Caenorhabditis elegans OX=6239 GN=clp-1 PE=2 SV=4	1	1	1	1.7	83.642	780	1.7	0	21530000	0
P34331	CAEEL Serine/threonine-protein kinase plk-1	plk-1	sp|P34331|PLK1_CAEEL Serine/threonine-protein kinase plk-1 OS=Caenorhabditis elegans OX=6239 GN=plk-1 PE=1 SV=3	1	1	1	1.7	73.633	649	1.7	0	18621000	0
P34455	CAEEL Probable aconitate hydratase, mitochondrial	aco-2	sp|P34455|ACON_CAEEL Probable aconitate hydratase, mitochondrial OS=Caenorhabditis elegans OX=6239 GN=aco-2 PE=3 SV=2	1	1	1	1.9	84.046	777	1.9	0	8813000	0
P34500	CAEEL Transthyretin-like protein 2	ttr-2	sp|P34500|TTR2_CAEEL Transthyretin-like protein 2 OS=Caenorhabditis elegans OX=6239 GN=ttr-2 PE=1 SV=1	1	1	1	6.8	15.703	148	6.8	6.8	16861000	29486000
P34556	CAEEL Cyclin-dependent kinase 1	cdk-1	sp|P34556|CDK1_CAEEL Cyclin-dependent kinase 1 OS=Caenorhabditis elegans OX=6239 GN=cdk-1 PE=1 SV=1	1	1	1	4.2	38.295	332	4.2	0	2046000	0
P34575	CAEEL Probable citrate synthase, mitochondrial	cts-1	sp|P34575|CISY_CAEEL Probable citrate synthase, mitochondrial OS=Caenorhabditis elegans OX=6239 GN=cts-1 PE=3 SV=1	1	1	1	2.4	51.54	468	2.4	0	6113500	0
P34604	CAEEL Probable translation initiation factor eIF-2B subunit alpha	ZK1098.4	sp|P34604|EI2BA_CAEEL Probable translation initiation factor eIF-2B subunit alpha OS=Caenorhabditis elegans OX=6239 GN=ZK1098.4 PE=1 SV=1	1	1	1	3	34.117	305	3	0	6970500	0
P35129	CAEEL Ubiquitin-conjugating enzyme E2 2	let-70	sp|P35129|UBC2_CAEEL Ubiquitin-conjugating enzyme E2 2 OS=Caenorhabditis elegans OX=6239 GN=let-70 PE=1 SV=1	1	1	1	4.8	16.705	147	4.8	0	19595000	0
P36609	CAEEL Neuronal calcium sensor 2	ncs-2	sp|P36609|NCS2_CAEEL Neuronal calcium sensor 2 OS=Caenorhabditis elegans OX=6239 GN=ncs-2 PE=2 SV=2	1	1	1	5.3	21.985	190	5.3	0	11062000	0
Q9U9I9;P39055	CAEEL Dynamin	dyn-1	tr|Q9U9I9|Q9U9I9_CAEEL Dynamin OS=Caenorhabditis elegans OX=6239 GN=dyn-1 PE=1 SV=1;sp|P39055|DYN1_CAEEL Dynamin OS=Caenorhabditis elegans OX=6239 GN=dyn-1 PE=1 SV=3	2	1	1	1.4	94.361	838	1.4	0	5920200	0
P41847	CAEEL Anamorsin homolog	T20B12.7	sp|P41847|DRE2_CAEEL Anamorsin homolog OS=Caenorhabditis elegans OX=6239 GN=T20B12.7 PE=3 SV=1	1	1	1	3.8	25.551	238	3.8	3.8	0	8670400
P41937;P52275	CAEEL Tubulin beta-4 chain	tbb-4	sp|P41937|TBB4_CAEEL Tubulin beta-4 chain OS=Caenorhabditis elegans OX=6239 GN=tbb-4 PE=3 SV=1;sp|P52275|TBB2_CAEEL Tubulin beta-2 chain OS=Caenorhabditis elegans OX=6239 GN=tbb-2 PE=1 SV=1	2	3	1	6.8	49.8	444	6.8	2	49682000	60336000
P41988	CAEEL T-complex protein 1 subunit alpha	cct-1	sp|P41988|TCPA_CAEEL T-complex protein 1 subunit alpha OS=Caenorhabditis elegans OX=6239 GN=cct-1 PE=3 SV=2	1	1	1	2.4	58.802	549	2.4	0	5147800	0
Q95ZN7;P46548	CAEEL Glycylpeptide N-tetradecanoyltransferase	nmt-1	tr|Q95ZN7|Q95ZN7_CAEEL Glycylpeptide N-tetradecanoyltransferase OS=Caenorhabditis elegans OX=6239 GN=nmt-1 PE=1 SV=1;sp|P46548|NMT_CAEEL Probable glycylpeptide N-tetradecanoyltransferase OS=Caenorhabditis elegans OX=6239 GN=nmt-1 PE=3 SV=1	2	1	1	1.8	51.164	452	1.8	0	29220000	0
P46561	CAEEL ATP synthase subunit beta, mitochondrial	atp-2	sp|P46561|ATPB_CAEEL ATP synthase subunit beta, mitochondrial OS=Caenorhabditis elegans OX=6239 GN=atp-2 PE=1 SV=2	1	1	1	1.9	57.526	538	1.9	0	3217600	0
P46562	CAEEL Putative aldehyde dehydrogenase family 7 member A1 homolog	alh-9	sp|P46562|AL7A1_CAEEL Putative aldehyde dehydrogenase family 7 member A1 homolog OS=Caenorhabditis elegans OX=6239 GN=alh-9 PE=3 SV=2	1	1	1	1.5	57.012	531	1.5	0	9590900	0
P46582	CAEEL Protein sumv-1	sumv-1	sp|P46582|SUMV1_CAEEL Protein sumv-1 OS=Caenorhabditis elegans OX=6239 GN=sumv-1 PE=2 SV=2	1	1	1	1.1	112.21	1024	0	1.1	0	0
P47208	CAEEL T-complex protein 1 subunit delta	cct-4	sp|P47208|TCPD_CAEEL T-complex protein 1 subunit delta OS=Caenorhabditis elegans OX=6239 GN=cct-4 PE=2 SV=1	1	1	1	2.4	58.391	540	2.4	0	6399300	0
P47209	CAEEL T-complex protein 1 subunit epsilon	cct-5	sp|P47209|TCPE_CAEEL T-complex protein 1 subunit epsilon OS=Caenorhabditis elegans OX=6239 GN=cct-5 PE=2 SV=1	1	1	1	2.2	59.406	542	2.2	0	21843000	0
P48150	CAEEL 40S ribosomal protein S14	rps-14	sp|P48150|RS14_CAEEL 40S ribosomal protein S14 OS=Caenorhabditis elegans OX=6239 GN=rps-14 PE=3 SV=1	1	1	1	7.2	16.249	152	7.2	0	130920000	0
P48154	CAEEL 40S ribosomal protein S3a	rps-1	sp|P48154|RS3A_CAEEL 40S ribosomal protein S3a OS=Caenorhabditis elegans OX=6239 GN=rps-1 PE=3 SV=2	1	1	1	3.5	28.96	257	3.5	0	21366000	0
P48158	CAEEL 60S ribosomal protein L23	rpl-23	sp|P48158|RL23_CAEEL 60S ribosomal protein L23 OS=Caenorhabditis elegans OX=6239 GN=rpl-23 PE=3 SV=1	1	1	1	7.1	14.954	140	7.1	7.1	0	9755500
P48727	CAEEL Serine/threonine-protein phosphatase PP1-beta	gsp-2	sp|P48727|GLC7B_CAEEL Serine/threonine-protein phosphatase PP1-beta OS=Caenorhabditis elegans OX=6239 GN=gsp-2 PE=1 SV=1	1	1	1	3	37.791	333	3	0	9183200	0
P49595	CAEEL Protein phosphatase ppm-1.G	ppm-1.G	sp|P49595|PPM1G_CAEEL Protein phosphatase ppm-1.G OS=Caenorhabditis elegans OX=6239 GN=ppm-1.G PE=3 SV=2	1	1	1	2	53.141	491	2	0	7942900	0
P52015	CAEEL Peptidyl-prolyl cis-trans isomerase 7	cyn-7	sp|P52015|CYP7_CAEEL Peptidyl-prolyl cis-trans isomerase 7 OS=Caenorhabditis elegans OX=6239 GN=cyn-7 PE=1 SV=2	1	1	1	7	18.401	171	7	7	17111000	70854000
Q86D21;P52709	CAEEL AA_TRNA_LIGASE_II domain-containing protein	tars-1	tr|Q86D21|Q86D21_CAEEL AA_TRNA_LIGASE_II domain-containing protein OS=Caenorhabditis elegans OX=6239 GN=tars-1 PE=1 SV=1;sp|P52709|SYTC_CAEEL Threonine--tRNA ligase, cytoplasmic OS=Caenorhabditis elegans OX=6239 GN=tars-1 PE=3 SV=1	2	1	1	1.2	79.463	684	1.2	1.2	36572000	44473000
P52819	CAEEL 60S ribosomal protein L22	rpl-22	sp|P52819|RL22_CAEEL 60S ribosomal protein L22 OS=Caenorhabditis elegans OX=6239 GN=rpl-22 PE=1 SV=3	1	1	1	7.7	14.946	130	7.7	0	46397000	0
P52872	CAEEL Dolichyl-diphosphooligosaccharide--protein glycosyltransferase subunit dad-1	dad-1	sp|P52872|DAD1_CAEEL Dolichyl-diphosphooligosaccharide--protein glycosyltransferase subunit dad-1 OS=Caenorhabditis elegans OX=6239 GN=dad-1 PE=3 SV=1	1	1	1	8.8	12.747	113	8.8	0	1645400	0
Q95XU7;Q9TVW5;Q94053;Q21244;Q19832;Q18461;Q17856;P53020;P53019;P53017	CAEEL Major sperm protein	CELE_Y59H11AM.1	tr|Q95XU7|Q95XU7_CAEEL Major sperm protein OS=Caenorhabditis elegans OX=6239 GN=CELE_Y59H11AM.1 PE=1 SV=1;sp|Q9TVW5|MSP77_CAEEL Major sperm protein 77/79 OS=Caenorhabditis elegans OX=6239 GN=msp-77 PE=2 SV=3;sp|Q94053|MSP78_CAEEL Major sperm protein 78 OS=	10	1	1	12.6	14.195	127	12.6	0	0	0
P53588	CAEEL Succinate--CoA ligase [ADP-forming] subunit beta, mitochondrial	suca-1	sp|P53588|SUCB1_CAEEL Succinate--CoA ligase [ADP-forming] subunit beta, mitochondrial OS=Caenorhabditis elegans OX=6239 GN=suca-1 PE=3 SV=1	1	1	1	2.3	47.419	435	2.3	0	2758400	0
P54811	CAEEL Transitional endoplasmic reticulum ATPase homolog 1	cdc-48.1	sp|P54811|TERA1_CAEEL Transitional endoplasmic reticulum ATPase homolog 1 OS=Caenorhabditis elegans OX=6239 GN=cdc-48.1 PE=1 SV=1	1	1	1	1.2	89.784	809	1.2	0	22603000	0
P83387;Q5R3Y2;P83386	CAEEL MARVEL domain-containing protein	CELE_F47B3.3	tr|P83387|P83387_CAEEL MARVEL domain-containing protein OS=Caenorhabditis elegans OX=6239 GN=CELE_F47B3.3 PE=4 SV=1;tr|Q5R3Y2|Q5R3Y2_CAEEL MARVEL domain-containing protein OS=Caenorhabditis elegans OX=6239 GN=CELE_F28H1.4 PE=1 SV=1;tr|P83386|P83386_CAEEL M	3	1	1	9.6	17.617	156	9.6	0	6120400	0
P90780;P90778	CAEEL SKN-1 Dependent Zygotic transcript	sdz-8	tr|P90780|P90780_CAEEL SKN-1 Dependent Zygotic transcript OS=Caenorhabditis elegans OX=6239 GN=sdz-8 PE=1 SV=1;tr|P90778|P90778_CAEEL Uncharacterized protein OS=Caenorhabditis elegans OX=6239 GN=C55A6.3 PE=1 SV=3	2	1	1	4.8	26.702	250	4.8	0	16945000	0
P90889	CAEEL Uncharacterized protein	CELE_F55H12.4	tr|P90889|P90889_CAEEL Uncharacterized protein OS=Caenorhabditis elegans OX=6239 GN=CELE_F55H12.4 PE=1 SV=1	1	1	1	3.8	22.043	208	0	3.8	0	86366000
P90961	CAEEL Clathrin light chain	clic-1	tr|P90961|P90961_CAEEL Clathrin light chain OS=Caenorhabditis elegans OX=6239 GN=clic-1 PE=1 SV=1	1	1	1	3.5	24.443	226	3.5	0	7509200	0
P91001	CAEEL COP9 signalosome complex subunit 5	csn-5	sp|P91001|CSN5_CAEEL COP9 signalosome complex subunit 5 OS=Caenorhabditis elegans OX=6239 GN=csn-5 PE=1 SV=1	1	1	1	4.1	41.008	368	4.1	0	0	0
P91250	CAEEL Col_cuticle_N domain-containing protein	col-73	tr|P91250|P91250_CAEEL Col_cuticle_N domain-containing protein OS=Caenorhabditis elegans OX=6239 GN=col-73 PE=1 SV=1	1	1	1	2.8	28.263	285	2.8	0	23383000	0
P91254;P91253	CAEEL Probable glutathione S-transferase 8	gst-8	sp|P91254|GST8_CAEEL Probable glutathione S-transferase 8 OS=Caenorhabditis elegans OX=6239 GN=gst-8 PE=3 SV=1;sp|P91253|GST7_CAEEL Probable glutathione S-transferase 7 OS=Caenorhabditis elegans OX=6239 GN=gst-7 PE=3 SV=1	2	1	1	3.9	23.432	206	3.9	0	115140000	0
P91284;Q6BEW1	CAEEL Uncharacterized protein	CELE_F27C1.2	tr|P91284|P91284_CAEEL Uncharacterized protein OS=Caenorhabditis elegans OX=6239 GN=CELE_F27C1.2 PE=1 SV=1;tr|Q6BEW1|Q6BEW1_CAEEL Uncharacterized protein OS=Caenorhabditis elegans OX=6239 GN=CELE_F27C1.2 PE=1 SV=1	2	1	1	4.4	27.816	252	4.4	0	0	0
P91372	CAEEL Uncharacterized protein	CELE_K11H12.7	tr|P91372|P91372_CAEEL Uncharacterized protein OS=Caenorhabditis elegans OX=6239 GN=CELE_K11H12.7 PE=1 SV=1	1	1	1	8.7	14.141	127	8.7	0	3328500	0
P91844	CAEEL Microfilaria Surface-Associated protein	msa-1	tr|P91844|P91844_CAEEL Microfilaria Surface-Associated protein OS=Caenorhabditis elegans OX=6239 GN=msa-1 PE=1 SV=1	1	1	1	6.3	19.215	174	6.3	0	12298000	0
P91871	CAEEL Carrier domain-containing protein	fasn-1	tr|P91871|P91871_CAEEL Carrier domain-containing protein OS=Caenorhabditis elegans OX=6239 GN=fasn-1 PE=1 SV=2	1	1	1	0.5	289.22	2613	0.5	0	8274200	0
P91913	CAEEL 60S acidic ribosomal protein P1	rla-1	sp|P91913|RLA1_CAEEL 60S acidic ribosomal protein P1 OS=Caenorhabditis elegans OX=6239 GN=rla-1 PE=3 SV=2	1	1	1	31.5	11.284	111	31.5	0	11728000	0
Q03561	CAEEL Neuropeptide-like peptide 36	nlp-36	sp|Q03561|NLP36_CAEEL Neuropeptide-like peptide 36 OS=Caenorhabditis elegans OX=6239 GN=nlp-36 PE=1 SV=1	1	1	1	12.2	9.427	82	12.2	0	6363700	0
Q03567	CAEEL Uncharacterized transporter slc-17.2	C38C10.2	sp|Q03567|SL172_CAEEL Uncharacterized transporter slc-17.2 OS=Caenorhabditis elegans OX=6239 GN=C38C10.2 PE=1 SV=2	1	1	1	1.8	52.737	493	1.8	0	41308000	0
Q03577	CAEEL Aspartate--tRNA ligase, cytoplasmic	dars-1	sp|Q03577|SYDC_CAEEL Aspartate--tRNA ligase, cytoplasmic OS=Caenorhabditis elegans OX=6239 GN=dars-1 PE=3 SV=1	1	1	1	2.1	59.939	531	2.1	0	6526600	0
Q04908	CAEEL 26S proteasome non-ATPase regulatory subunit 3	rpn-3	sp|Q04908|PSMD3_CAEEL 26S proteasome non-ATPase regulatory subunit 3 OS=Caenorhabditis elegans OX=6239 GN=rpn-3 PE=1 SV=1	1	1	1	2	57.506	504	2	0	15169000	0
Q05036	CAEEL Heat shock protein 110	hsp-110	sp|Q05036|HS110_CAEEL Heat shock protein 110 OS=Caenorhabditis elegans OX=6239 GN=hsp-110 PE=3 SV=1	1	1	1	1.2	86.896	776	1.2	0	9723700	0
Q07749	CAEEL Actin-depolymerizing factor 2, isoform c	unc-60	sp|Q07749|ADF2_CAEEL Actin-depolymerizing factor 2, isoform c OS=Caenorhabditis elegans OX=6239 GN=unc-60 PE=1 SV=1	1	1	1	7.2	17.046	152	7.2	7.2	52109000	50785000
Q07750	CAEEL Actin-depolymerizing factor 1, isoforms a/b	unc-60	sp|Q07750|ADF1_CAEEL Actin-depolymerizing factor 1, isoforms a/b OS=Caenorhabditis elegans OX=6239 GN=unc-60 PE=1 SV=2	1	1	1	7.5	23.578	212	7.5	0	4307300	0
Q09474	CAEEL Tryptophan 2,3-dioxygenase	tdo-2	sp|Q09474|T23O_CAEEL Tryptophan 2,3-dioxygenase OS=Caenorhabditis elegans OX=6239 GN=tdo-2 PE=1 SV=1	1	1	1	3.2	46.716	403	3.2	0	14487000	0
Q09477	CAEEL Zinc finger protein dpff-1	dpff-1	sp|Q09477|DPFF1_CAEEL Zinc finger protein dpff-1 OS=Caenorhabditis elegans OX=6239 GN=dpff-1 PE=3 SV=2	1	1	1	2.4	42.418	372	2.4	0	33243000	0
Q09486	CAEEL Uncharacterized protein	C30G12.2	tr|Q09486|Q09486_CAEEL Uncharacterized protein OS=Caenorhabditis elegans OX=6239 GN=C30G12.2 PE=1 SV=3	1	1	1	5.4	30.567	276	5.4	0	3913500	0
Q09489	CAEEL Thioredoxin domain-containing protein	C32D5.8	tr|Q09489|Q09489_CAEEL Thioredoxin domain-containing protein OS=Caenorhabditis elegans OX=6239 GN=C32D5.8 PE=1 SV=1	1	1	1	5	15.669	140	5	0	6766300	0
Q09508	CAEEL Succinate dehydrogenase [ubiquinone] flavoprotein subunit, mitochondrial	sdha-1	sp|Q09508|SDHA_CAEEL Succinate dehydrogenase [ubiquinone] flavoprotein subunit, mitochondrial OS=Caenorhabditis elegans OX=6239 GN=sdha-1 PE=2 SV=3	1	1	1	1.9	70.397	646	1.9	0	10533000	0
Q09509	CAEEL Putative folylpolyglutamate synthase	F25B5.6	sp|Q09509|FOLC_CAEEL Putative folylpolyglutamate synthase OS=Caenorhabditis elegans OX=6239 GN=F25B5.6 PE=3 SV=1	1	1	1	2.2	56.432	510	2.2	0	0	0
Q09533	CAEEL 60S ribosomal protein L10	rpl-10	sp|Q09533|RL10_CAEEL 60S ribosomal protein L10 OS=Caenorhabditis elegans OX=6239 GN=rpl-10 PE=3 SV=1	1	1	1	4.2	24.749	214	4.2	0	11783000	0
Q09545	CAEEL Succinate dehydrogenase [ubiquinone] iron-sulfur subunit, mitochondrial	sdhb-1	sp|Q09545|SDHB_CAEEL Succinate dehydrogenase [ubiquinone] iron-sulfur subunit, mitochondrial OS=Caenorhabditis elegans OX=6239 GN=sdhb-1 PE=2 SV=1	1	1	1	2.7	32.891	298	2.7	0	4424500	0
Q09596	CAEEL Probable glutathione S-transferase 5	gst-5	sp|Q09596|GST5_CAEEL Probable glutathione S-transferase 5 OS=Caenorhabditis elegans OX=6239 GN=gst-5 PE=1 SV=1	1	1	1	3.4	23.252	207	3.4	3.4	27068000	26180000
Q0G839	CAEEL PKS_ER domain-containing protein	CELE_M106.3	tr|Q0G839|Q0G839_CAEEL PKS_ER domain-containing protein OS=Caenorhabditis elegans OX=6239 GN=CELE_M106.3 PE=1 SV=1	1	1	1	4.4	39.807	365	4.4	0	3647400	0
Q8I711;Q10039	CAEEL Glycine--tRNA ligase	gars-1	tr|Q8I711|Q8I711_CAEEL Glycine--tRNA ligase OS=Caenorhabditis elegans OX=6239 GN=gars-1 PE=1 SV=1;sp|Q10039|GARS_CAEEL Glycine--tRNA ligase OS=Caenorhabditis elegans OX=6239 GN=gars-1 PE=1 SV=2	2	1	1	1.5	76.483	678	1.5	1.5	6028500	16383000
Q10454	CAEEL Probable arginine kinase F46H5.3	F46H5.3	sp|Q10454|KARG1_CAEEL Probable arginine kinase F46H5.3 OS=Caenorhabditis elegans OX=6239 GN=F46H5.3 PE=3 SV=2	1	1	1	2.5	44.167	396	2.5	2.5	0	57683000
Q10657	CAEEL Triosephosphate isomerase	tpi-1	sp|Q10657|TPIS_CAEEL Triosephosphate isomerase OS=Caenorhabditis elegans OX=6239 GN=tpi-1 PE=1 SV=2	1	1	1	4	26.574	247	4	0	23833000	0
Q11067	CAEEL Protein disulfide-isomerase A6 homolog	pdi-6	sp|Q11067|PDIA6_CAEEL Protein disulfide-isomerase A6 homolog OS=Caenorhabditis elegans OX=6239 GN=pdi-6 PE=3 SV=1	1	1	1	3.4	47.727	440	0	3.4	0	19651000
Q11117	CAEEL LAMP family protein lmp-1	lmp-1	sp|Q11117|LMP1_CAEEL LAMP family protein lmp-1 OS=Caenorhabditis elegans OX=6239 GN=lmp-1 PE=2 SV=1	1	1	1	7.2	25.792	237	7.2	7.2	20287000	6795500
Q18906;Q17324;Q20950	CAEEL Cysteine protease (Fragment)		tr|Q18906|Q18906_CAEEL Cysteine protease (Fragment) OS=Caenorhabditis elegans OX=6239 PE=3 SV=1;tr|Q17324|Q17324_CAEEL Cysteine protease (Fragment) OS=Caenorhabditis elegans OX=6239 PE=3 SV=1;tr|Q20950|Q20950_CAEEL Pept_C1 domain-containing protein OS=Caen	3	1	1	8.3	14.247	133	8.3	0	9682000	0
Q17334	CAEEL Alcohol dehydrogenase 1	sodh-1	sp|Q17334|ADH1_CAEEL Alcohol dehydrogenase 1 OS=Caenorhabditis elegans OX=6239 GN=sodh-1 PE=2 SV=2	1	1	1	2.6	37.696	349	2.6	0	0	0
Q7K798;Q7K797;Q9U302;Q17350	CAEEL Polyadenylate-binding protein	pab-1	tr|Q7K798|Q7K798_CAEEL Polyadenylate-binding protein OS=Caenorhabditis elegans OX=6239 GN=pab-1 PE=1 SV=1;tr|Q7K797|Q7K797_CAEEL Polyadenylate-binding protein OS=Caenorhabditis elegans OX=6239 GN=pab-1 PE=1 SV=1;tr|Q9U302|Q9U302_CAEEL Polyadenylate-binding	4	1	1	1.4	64.767	583	1.4	1.4	4215200	20508000
Q17574	CAEEL Methionine synthase reductase	mtrr-1	sp|Q17574|MTRR_CAEEL Methionine synthase reductase OS=Caenorhabditis elegans OX=6239 GN=mtrr-1 PE=3 SV=1	1	1	1	3.8	76.833	682	3.8	0	55552000	0
Q17763	CAEEL ATP synthase subunit	atp-5	tr|Q17763|Q17763_CAEEL ATP synthase subunit OS=Caenorhabditis elegans OX=6239 GN=atp-5 PE=1 SV=2	1	1	1	4.7	21.797	191	4.7	0	33624000	0
Q18032	CAEEL Uncharacterized protein	C15H9.9	tr|Q18032|Q18032_CAEEL Uncharacterized protein OS=Caenorhabditis elegans OX=6239 GN=C15H9.9 PE=1 SV=1	1	1	1	8	14.507	137	8	0	5667300	0
Q18061	CAEEL Uncharacterized protein	C17C3.3	tr|Q18061|Q18061_CAEEL Uncharacterized protein OS=Caenorhabditis elegans OX=6239 GN=C17C3.3 PE=4 SV=2	1	1	1	3.5	35.904	316	0	3.5	0	0
Q18068	CAEEL Uncharacterized protein	C18A11.3	tr|Q18068|Q18068_CAEEL Uncharacterized protein OS=Caenorhabditis elegans OX=6239 GN=C18A11.3 PE=1 SV=3	1	1	1	3.4	30.363	268	3.4	0	0	0
Q18115	CAEEL 26S proteasome non-ATPase regulatory subunit 1	rpn-2	sp|Q18115|PSMD1_CAEEL 26S proteasome non-ATPase regulatory subunit 1 OS=Caenorhabditis elegans OX=6239 GN=rpn-2 PE=3 SV=4	1	1	1	1.2	106.01	965	1.2	0	3709100	0
W6RY53;Q18196	CAEEL Uncharacterized protein	C26B2.7	tr|W6RY53|W6RY53_CAEEL Uncharacterized protein OS=Caenorhabditis elegans OX=6239 GN=C26B2.7 PE=1 SV=1;tr|Q18196|Q18196_CAEEL Uncharacterized protein OS=Caenorhabditis elegans OX=6239 GN=C26B2.7 PE=1 SV=1	2	1	1	10	11.671	100	10	0	0	0
Q18211	CAEEL Regulator of chromosome condensation	ran-3	sp|Q18211|RCC1_CAEEL Regulator of chromosome condensation OS=Caenorhabditis elegans OX=6239 GN=ran-3 PE=4 SV=1	1	1	1	1.8	61.484	569	1.8	0	13906000	0
Q18624	CAEEL SAND domain-containing protein	gmeb-3	tr|Q18624|Q18624_CAEEL SAND domain-containing protein OS=Caenorhabditis elegans OX=6239 GN=gmeb-3 PE=1 SV=2	1	1	1	6.6	42.769	376	0	6.6	0	34430000
Q18787	CAEEL 26S proteasome regulatory subunit 7	rpt-1	sp|Q18787|PRS7_CAEEL 26S proteasome regulatory subunit 7 OS=Caenorhabditis elegans OX=6239 GN=rpt-1 PE=1 SV=1	1	1	1	2.1	48.61	435	2.1	0	3891400	0
Q19007	CAEEL Nucleosome Assembly Protein	nap-1	tr|Q19007|Q19007_CAEEL Nucleosome Assembly Protein OS=Caenorhabditis elegans OX=6239 GN=nap-1 PE=1 SV=1	1	1	1	3.5	35.664	316	3.5	0	47345000	0
Q19058	CAEEL MAO-C-like dehydratase domain	maoc-1	tr|Q19058|Q19058_CAEEL MAO-C-like dehydratase domain OS=Caenorhabditis elegans OX=6239 GN=maoc-1 PE=1 SV=1	1	1	1	3	32.721	298	3	0	5695800	0
Q19328	CAEEL Staphylococcal nuclease domain-containing protein	tsn-1	tr|Q19328|Q19328_CAEEL Staphylococcal nuclease domain-containing protein OS=Caenorhabditis elegans OX=6239 GN=tsn-1 PE=1 SV=1	1	1	1	1.4	100.77	914	1.4	0	10716000	0
Q9U3I6;Q19584	CAEEL Ubiquitin fusion degradation protein 1 homolog	ufd-1	tr|Q9U3I6|Q9U3I6_CAEEL Ubiquitin fusion degradation protein 1 homolog OS=Caenorhabditis elegans OX=6239 GN=ufd-1 PE=1 SV=1;sp|Q19584|UFD1_CAEEL Ubiquitin fusion degradation protein 1 homolog OS=Caenorhabditis elegans OX=6239 GN=ufd-1 PE=1 SV=1	2	1	1	2.7	36.521	336	2.7	0	0	0
Q19655	CAEEL Rieske domain-containing protein	CELE_F20D6.11	tr|Q19655|Q19655_CAEEL Rieske domain-containing protein OS=Caenorhabditis elegans OX=6239 GN=CELE_F20D6.11 PE=1 SV=2	1	1	1	1.6	60.263	549	1.6	0	22032000	0
Q19766	CAEEL Mitochondrial import receptor subunit TOM20 homolog	tomm-20	sp|Q19766|TOM20_CAEEL Mitochondrial import receptor subunit TOM20 homolog OS=Caenorhabditis elegans OX=6239 GN=tomm-20 PE=1 SV=1	1	1	1	5.3	20.426	188	5.3	0	4247200	0
Q19818	CAEEL NHL (Ring finger b-box coiled coil) domain containing	nhl-2	tr|Q19818|Q19818_CAEEL NHL (Ring finger b-box coiled coil) domain containing OS=Caenorhabditis elegans OX=6239 GN=nhl-2 PE=1 SV=2	1	1	1	1.2	112.16	1032	1.2	1.2	0	102000000
Q20059	CAEEL WD repeat-containing protein 48 homolog	wdr-48	sp|Q20059|WDR48_CAEEL WD repeat-containing protein 48 homolog OS=Caenorhabditis elegans OX=6239 GN=wdr-48 PE=1 SV=2	1	1	1	1.3	76.673	683	1.3	0	4446100	0
Q20140	CAEEL Adenylate kinase isoenzyme 1	F38B2.4	sp|Q20140|KAD1_CAEEL Adenylate kinase isoenzyme 1 OS=Caenorhabditis elegans OX=6239 GN=F38B2.4 PE=2 SV=1	1	1	1	4.3	22.597	210	0	4.3	0	46574000
Q20168	CAEEL Probable coatomer subunit beta	copb-2	sp|Q20168|COPB2_CAEEL Probable coatomer subunit beta OS=Caenorhabditis elegans OX=6239 GN=copb-2 PE=3 SV=3	1	1	1	1.2	111.11	1000	1.2	0	3803300	0
Q20264	CAEEL Fatty Acid CoA Synthetase family	acs-11	tr|Q20264|Q20264_CAEEL Fatty Acid CoA Synthetase family OS=Caenorhabditis elegans OX=6239 GN=acs-11 PE=1 SV=3	1	1	1	2.8	55.735	505	2.8	0	4714000	0
Q20471	CAEEL Casein kinase I isoform delta	kin-20	sp|Q20471|KIN20_CAEEL Casein kinase I isoform delta OS=Caenorhabditis elegans OX=6239 GN=kin-20 PE=2 SV=3	1	1	1	2.2	56.808	497	2.2	0	5509600	0
Q20480	CAEEL NAD-dependent protein deacylase sir-2.2	sir-2.2	sp|Q20480|SIR41_CAEEL NAD-dependent protein deacylase sir-2.2 OS=Caenorhabditis elegans OX=6239 GN=sir-2.2 PE=1 SV=1	1	1	1	3.5	32.347	287	3.5	0	4959300	0
Q20939	CAEEL Putative pyridoxamine 5-phosphate oxidase	F57B9.1	sp|Q20939|PDXH_CAEEL Putative pyridoxamine 5-phosphate oxidase OS=Caenorhabditis elegans OX=6239 GN=F57B9.1 PE=3 SV=2	1	1	1	5.3	26.1	226	5.3	0	0	0
Q20970	CAEEL Methionine--tRNA ligase, cytoplasmic	mars-1	sp|Q20970|SYMC_CAEEL Methionine--tRNA ligase, cytoplasmic OS=Caenorhabditis elegans OX=6239 GN=mars-1 PE=3 SV=1	1	1	1	1.4	101.71	917	1.4	0	12918000	0
Q21166	CAEEL Acetoacetyl-CoA synthetase	sur-5	sp|Q21166|SUR5_CAEEL Acetoacetyl-CoA synthetase OS=Caenorhabditis elegans OX=6239 GN=sur-5 PE=2 SV=1	1	1	1	1.6	78.338	700	1.6	1.6	12456000	0
Q21210	CAEEL Uncharacterized protein	CELE_K04C2.2	tr|Q21210|Q21210_CAEEL Uncharacterized protein OS=Caenorhabditis elegans OX=6239 GN=CELE_K04C2.2 PE=1 SV=1	1	1	1	1	109.85	990	1	0	0	0
Q21278	CAEEL Pre-mRNA-splicing factor SLU7	K07C5.6	sp|Q21278|SLU7_CAEEL Pre-mRNA-splicing factor SLU7 OS=Caenorhabditis elegans OX=6239 GN=K07C5.6 PE=3 SV=1	1	1	1	1.7	74.46	647	1.7	0	111790000	0
Q21312	CAEEL Uncharacterized protein	CELE_K08C7.1	tr|Q21312|Q21312_CAEEL Uncharacterized protein OS=Caenorhabditis elegans OX=6239 GN=CELE_K08C7.1 PE=1 SV=3	1	1	1	2.8	48.524	431	2.8	0	1779700	0
Q21350	CAEEL AAA domain-containing protein	ctf-18	tr|Q21350|Q21350_CAEEL AAA domain-containing protein OS=Caenorhabditis elegans OX=6239 GN=ctf-18 PE=1 SV=1	1	1	1	1.2	96.891	850	1.2	0	0	0
Q21436	CAEEL Nuclear Pore complex Protein	npp-3	tr|Q21436|Q21436_CAEEL Nuclear Pore complex Protein OS=Caenorhabditis elegans OX=6239 GN=npp-3 PE=1 SV=1	1	1	1	0.9	191.32	1696	0.9	0.9	0	1645600
Q21481	CAEEL SCP2 domain-containing protein	dhs-28	tr|Q21481|Q21481_CAEEL SCP2 domain-containing protein OS=Caenorhabditis elegans OX=6239 GN=dhs-28 PE=1 SV=1	1	1	1	2.8	46.262	436	2.8	0	0	0
Q21525	CAEEL Uncharacterized protein	taap-1	tr|Q21525|Q21525_CAEEL Uncharacterized protein OS=Caenorhabditis elegans OX=6239 GN=taap-1 PE=1 SV=1	1	1	1	9.3	18.288	161	9.3	0	4094100	0
Q21641	CAEEL Uncharacterized protein	CELE_R02E12.4	tr|Q21641|Q21641_CAEEL Uncharacterized protein OS=Caenorhabditis elegans OX=6239 GN=CELE_R02E12.4 PE=4 SV=2	1	1	1	3.5	46.458	400	3.5	0	29812000	0
Q21732	CAEEL Uncharacterized protein	CELE_R04F11.2	tr|Q21732|Q21732_CAEEL Uncharacterized protein OS=Caenorhabditis elegans OX=6239 GN=CELE_R04F11.2 PE=1 SV=1	1	1	1	9.3	12.303	107	9.3	9.3	130530000	63412000
Q21740	CAEEL DFDF domain-containing protein	edc-3	tr|Q21740|Q21740_CAEEL DFDF domain-containing protein OS=Caenorhabditis elegans OX=6239 GN=edc-3 PE=1 SV=1	1	1	1	1.8	62.637	566	1.8	1.8	0	27378000
Q21746	CAEEL Small Glutamine-rich Tetratrico repeat protein	sgt-1	tr|Q21746|Q21746_CAEEL Small Glutamine-rich Tetratrico repeat protein OS=Caenorhabditis elegans OX=6239 GN=sgt-1 PE=1 SV=1	1	1	1	3.3	36.467	337	3.3	0	2836800	0
Q21752	CAEEL Probable voltage-dependent anion-selective channel	vdac-1	sp|Q21752|VDAC_CAEEL Probable voltage-dependent anion-selective channel OS=Caenorhabditis elegans OX=6239 GN=vdac-1 PE=3 SV=2	1	1	1	3.9	29.96	283	3.9	0	38295000	0
Q21831	CAEEL SNF chromatin remodeling Complex component	snfc-5	tr|Q21831|Q21831_CAEEL SNF chromatin remodeling Complex component OS=Caenorhabditis elegans OX=6239 GN=snfc-5 PE=1 SV=1	1	1	1	2.6	42.846	381	2.6	0	30008000	0
Q21898	CAEEL V-type proton ATPase 16 kDa proteolipid subunit 1	vha-1	sp|Q21898|VATL1_CAEEL V-type proton ATPase 16 kDa proteolipid subunit 1 OS=Caenorhabditis elegans OX=6239 GN=vha-1 PE=2 SV=1	1	1	1	4.1	16.954	169	4.1	0	11711000	0
Q21925	CAEEL ProstaGlandin E Synthase homolog	pges-2	tr|Q21925|Q21925_CAEEL ProstaGlandin E Synthase homolog OS=Caenorhabditis elegans OX=6239 GN=pges-2 PE=1 SV=1	1	1	1	3.2	40.292	347	3.2	0	4924800	0
Q86LS6;Q21962	CAEEL Glycine cleavage system P protein	gldc-1	tr|Q86LS6|Q86LS6_CAEEL Glycine cleavage system P protein OS=Caenorhabditis elegans OX=6239 GN=gldc-1 PE=1 SV=2;tr|Q21962|Q21962_CAEEL Glycine cleavage system P protein OS=Caenorhabditis elegans OX=6239 GN=gldc-1 PE=1 SV=1	2	1	1	1.1	101.49	915	1.1	1.1	9653200	2215500
Q22038	CAEEL Ras-like GTP-binding protein rhoA	rho-1	sp|Q22038|RHO1_CAEEL Ras-like GTP-binding protein rhoA OS=Caenorhabditis elegans OX=6239 GN=rho-1 PE=1 SV=1	1	1	1	4.7	21.635	192	4.7	4.7	91581000	82345000
Q22109	CAEEL MFS domain-containing protein	mct-5	tr|Q22109|Q22109_CAEEL MFS domain-containing protein OS=Caenorhabditis elegans OX=6239 GN=mct-5 PE=1 SV=2	1	1	1	1.5	64.447	591	1.5	0	11488000	0
Q22111	CAEEL Methylmalonic aciduria type A homolog, mitochondrial	mmaa-1	sp|Q22111|MMAA1_CAEEL Methylmalonic aciduria type A homolog, mitochondrial OS=Caenorhabditis elegans OX=6239 GN=mmaa-1 PE=3 SV=2	1	1	1	3.3	44.216	399	3.3	0	3502500	0
Q22347	CAEEL Probable medium-chain specific acyl-CoA dehydrogenase 10, mitochondrial	acdh-10	sp|Q22347|ACADM_CAEEL Probable medium-chain specific acyl-CoA dehydrogenase 10, mitochondrial OS=Caenorhabditis elegans OX=6239 GN=acdh-10 PE=2 SV=1	1	1	1	1.9	44.818	417	1.9	0	42206000	0
Q22559	CAEEL PDZ domain-containing protein	CELE_T19B10.5	tr|Q22559|Q22559_CAEEL PDZ domain-containing protein OS=Caenorhabditis elegans OX=6239 GN=CELE_T19B10.5 PE=1 SV=3	1	1	1	2	65.808	596	2	0	994650	0
Q22781	CAEEL Acyl CoA DeHydrogenase	acdh-7	tr|Q22781|Q22781_CAEEL Acyl CoA DeHydrogenase OS=Caenorhabditis elegans OX=6239 GN=acdh-7 PE=1 SV=2	1	1	1	3.6	44.617	412	3.6	0	2100900	0
Q22806	CAEEL Uncharacterized protein	CELE_T26A8.1	tr|Q22806|Q22806_CAEEL Uncharacterized protein OS=Caenorhabditis elegans OX=6239 GN=CELE_T26A8.1 PE=1 SV=1	1	1	1	1.4	77.376	708	1.4	0	3577800	0
Q22968	CAEEL Aminomethyltransferase	gcst-1	tr|Q22968|Q22968_CAEEL Aminomethyltransferase OS=Caenorhabditis elegans OX=6239 GN=gcst-1 PE=1 SV=1	1	1	1	2.5	43.92	402	2.5	0	13258000	0
Q23050	CAEEL CaLponIn-liKe proteins	clik-1	tr|Q23050|Q23050_CAEEL CaLponIn-liKe proteins OS=Caenorhabditis elegans OX=6239 GN=clik-1 PE=1 SV=1	1	1	1	3.4	44.367	406	3.4	0	7945400	0
Q8MPS6;Q23089	CAEEL CRM1_C domain-containing protein	xpo-1	tr|Q8MPS6|Q8MPS6_CAEEL CRM1_C domain-containing protein OS=Caenorhabditis elegans OX=6239 GN=xpo-1 PE=1 SV=1;tr|Q23089|Q23089_CAEEL Importin N-terminal domain-containing protein OS=Caenorhabditis elegans OX=6239 GN=xpo-1 PE=1 SV=2	2	1	1	12.7	9.4494	79	12.7	0	26728000	0
Q23092	CAEEL Fatty acid-binding protein homolog 4	lbp-4	sp|Q23092|FABP4_CAEEL Fatty acid-binding protein homolog 4 OS=Caenorhabditis elegans OX=6239 GN=lbp-4 PE=3 SV=1	1	1	1	6.9	17.184	145	6.9	6.9	35372000	45955000
Q23194	CAEEL Vacuolar protein sorting-associated protein 18 homolog	vps-18	sp|Q23194|VPS18_CAEEL Vacuolar protein sorting-associated protein 18 homolog OS=Caenorhabditis elegans OX=6239 GN=vps-18 PE=1 SV=4	1	1	1	1	116.67	1026	1	0	0	0
Q23315	CAEEL Glutamyl(E) Amino-acyl tRNA Synthetase	ears-1	tr|Q23315|Q23315_CAEEL Glutamyl(E) Amino-acyl tRNA Synthetase OS=Caenorhabditis elegans OX=6239 GN=ears-1 PE=1 SV=1	1	1	1	1.1	125.2	1149	1.1	1.1	50187000	73344000
Q23381	CAEEL Probable methylmalonyl-CoA mutase, mitochondrial	mmcm-1	sp|Q23381|MUTA_CAEEL Probable methylmalonyl-CoA mutase, mitochondrial OS=Caenorhabditis elegans OX=6239 GN=mmcm-1 PE=3 SV=2	1	1	1	1.1	81.683	744	1.1	0	9769300	0
Q23449	CAEEL 26S proteasome non-ATPase regulatory subunit 8	rpn-12	sp|Q23449|PSMD8_CAEEL 26S proteasome non-ATPase regulatory subunit 8 OS=Caenorhabditis elegans OX=6239 GN=rpn-12 PE=3 SV=1	1	1	1	5.2	28.795	250	5.2	0	4058200	0
Q7Z145;Q23487	CAEEL FUBp (FUBP) Like	fubl-2	tr|Q7Z145|Q7Z145_CAEEL FUBp (FUBP) Like OS=Caenorhabditis elegans OX=6239 GN=fubl-2 PE=1 SV=1;tr|Q23487|Q23487_CAEEL FUBp (FUBP) Like OS=Caenorhabditis elegans OX=6239 GN=fubl-2 PE=1 SV=2	2	1	1	1.8	54.465	510	1.8	0	10050000	0
Q23571	CAEEL Lipoamide acyltransferase component of branched-chain alpha-keto acid dehydrogenase complex, mitochondrial	dbt-1	sp|Q23571|ODB2_CAEEL Lipoamide acyltransferase component of branched-chain alpha-keto acid dehydrogenase complex, mitochondrial OS=Caenorhabditis elegans OX=6239 GN=dbt-1 PE=2 SV=1	1	1	1	2.5	49.691	448	2.5	2.5	30273000	60260000
Q27365	CAEEL Protein lin-15A	lin-15A	sp|Q27365|LI15A_CAEEL Protein lin-15A OS=Caenorhabditis elegans OX=6239 GN=lin-15A PE=2 SV=1	1	1	1	1.3	80.062	719	1.3	0	8532200	0
Q27464	CAEEL Glucose-6-phosphate 1-dehydrogenase	gspd-1	sp|Q27464|G6PD_CAEEL Glucose-6-phosphate 1-dehydrogenase OS=Caenorhabditis elegans OX=6239 GN=gspd-1 PE=3 SV=1	1	1	1	1.7	60.215	522	1.7	1.7	64143000	175370000
Q27521	CAEEL Nuclear hormone receptor family member nhr-16	nhr-16	sp|Q27521|NHR16_CAEEL Nuclear hormone receptor family member nhr-16 OS=Caenorhabditis elegans OX=6239 GN=nhr-16 PE=2 SV=3	1	1	1	2.3	44.462	388	2.3	0	65166000	0
Q27GU2	CAEEL FABP domain-containing protein	lbp-3	tr|Q27GU2|Q27GU2_CAEEL FABP domain-containing protein OS=Caenorhabditis elegans OX=6239 GN=lbp-3 PE=1 SV=1	1	1	1	6.7	17.32	150	6.7	6.7	6733800	17475000
Q304E5;Q9TZQ3	CAEEL Guanyl-specific ribonuclease pgl-1	pgl-1	tr|Q304E5|Q304E5_CAEEL Guanyl-specific ribonuclease pgl-1 OS=Caenorhabditis elegans OX=6239 GN=pgl-1 PE=1 SV=1;sp|Q9TZQ3|PGL1_CAEEL Guanyl-specific ribonuclease pgl-1 OS=Caenorhabditis elegans OX=6239 GN=pgl-1 PE=1 SV=1	2	1	1	2.2	83.454	771	2.2	0	11158000	0
Q564Q1	CAEEL UDP-glucose 4-epimerase	gale-1	sp|Q564Q1|GALE_CAEEL UDP-glucose 4-epimerase OS=Caenorhabditis elegans OX=6239 GN=gale-1 PE=1 SV=1	1	1	1	4.3	37.883	349	4.3	0	20144000	0
Q5CCJ3;Q5CCJ2;Q9N5N9	CAEEL rRNA methyltransferase	CELE_H06I04.3	tr|Q5CCJ3|Q5CCJ3_CAEEL rRNA methyltransferase OS=Caenorhabditis elegans OX=6239 GN=CELE_H06I04.3 PE=1 SV=1;tr|Q5CCJ2|Q5CCJ2_CAEEL Putative rRNA methyltransferase OS=Caenorhabditis elegans OX=6239 GN=CELE_H06I04.3 PE=1 SV=1;tr|Q9N5N9|Q9N5N9_CAEEL Putative r	3	1	1	1.3	81.525	716	1.3	0	55992000	0
Q5F4W0	CAEEL CaDHerin family	cdh-1	tr|Q5F4W0|Q5F4W0_CAEEL CaDHerin family OS=Caenorhabditis elegans OX=6239 GN=cdh-1 PE=4 SV=1	1	1	1	0.4	306.34	2779	0.4	0	6651400	0
Q6EUU1;Q9XXU4	CAEEL G_PROTEIN_RECEP_F1_2 domain-containing protein	npr-10	tr|Q6EUU1|Q6EUU1_CAEEL G_PROTEIN_RECEP_F1_2 domain-containing protein OS=Caenorhabditis elegans OX=6239 GN=npr-10 PE=3 SV=1;tr|Q9XXU4|Q9XXU4_CAEEL G_PROTEIN_RECEP_F1_2 domain-containing protein OS=Caenorhabditis elegans OX=6239 GN=npr-10 PE=3 SV=1	2	1	1	3	40.576	362	0	3	0	0
Q8MNU8	CAEEL Protein FMC1 homolog	C29E4.12	sp|Q8MNU8|FMC1_CAEEL Protein FMC1 homolog OS=Caenorhabditis elegans OX=6239 GN=C29E4.12 PE=3 SV=1	1	1	1	9.3	12.138	108	9.3	9.3	13496000	32873000
Q8MXR6	CAEEL Homologous to Drosophila SQD (Squid) protein	sqd-1	tr|Q8MXR6|Q8MXR6_CAEEL Homologous to Drosophila SQD (Squid) protein OS=Caenorhabditis elegans OX=6239 GN=sqd-1 PE=1 SV=1	1	1	1	4.6	33.467	305	4.6	0	2153500	0
Q93315	CAEEL Cytochrome b5 heme-binding domain-containing protein	cytb-5.1	tr|Q93315|Q93315_CAEEL Cytochrome b5 heme-binding domain-containing protein OS=Caenorhabditis elegans OX=6239 GN=cytb-5.1 PE=1 SV=2	1	1	1	6.7	15.032	134	6.7	0	0	0
Q93615	CAEEL Probable electron transfer flavoprotein subunit alpha, mitochondrial	F27D4.1	sp|Q93615|ETFA_CAEEL Probable electron transfer flavoprotein subunit alpha, mitochondrial OS=Caenorhabditis elegans OX=6239 GN=F27D4.1 PE=3 SV=2	1	1	1	2.4	34.454	332	2.4	2.4	26282000	5556000
Q93761	CAEEL Uncharacterized oxidoreductase F53C11.3	F53C11.3	sp|Q93761|YXEK_CAEEL Uncharacterized oxidoreductase F53C11.3 OS=Caenorhabditis elegans OX=6239 GN=F53C11.3 PE=3 SV=1	1	1	1	4.2	33.389	313	4.2	0	3960300	0
Q93871	CAEEL Equilibrative Nucleoside Transporter	ent-2	tr|Q93871|Q93871_CAEEL Equilibrative Nucleoside Transporter OS=Caenorhabditis elegans OX=6239 GN=ent-2 PE=1 SV=1	1	1	1	2.9	50.495	450	2.9	0	31537000	0
Q95XE0	CAEEL SET domain-containing protein	set-28	tr|Q95XE0|Q95XE0_CAEEL SET domain-containing protein OS=Caenorhabditis elegans OX=6239 GN=set-28 PE=4 SV=1	1	1	1	3.8	27.462	240	3.8	0	0	0
Q95XS1	CAEEL TRanslocon-Associated Protein	trap-3	tr|Q95XS1|Q95XS1_CAEEL TRanslocon-Associated Protein OS=Caenorhabditis elegans OX=6239 GN=trap-3 PE=1 SV=1	1	1	1	5.6	19.702	178	5.6	0	11579000	0
Q95XS2	CAEEL Protein transport protein Sec61 subunit beta	sec-61.b	tr|Q95XS2|Q95XS2_CAEEL Protein transport protein Sec61 subunit beta OS=Caenorhabditis elegans OX=6239 GN=sec-61.b PE=1 SV=1	1	1	1	12.3	8.5558	81	12.3	0	6818300	0
Q95Y90	CAEEL 60S ribosomal protein L9	rpl-9	sp|Q95Y90|RL9_CAEEL 60S ribosomal protein L9 OS=Caenorhabditis elegans OX=6239 GN=rpl-9 PE=3 SV=1	1	1	1	4.2	21.508	189	4.2	4.2	144910000	135700000
Q9BKX2	CAEEL F-box domain-containing protein	CELE_Y22D7AR.2	tr|Q9BKX2|Q9BKX2_CAEEL F-box domain-containing protein OS=Caenorhabditis elegans OX=6239 GN=CELE_Y22D7AR.2 PE=1 SV=3	1	1	1	1.6	127.55	1133	1.6	1.6	4011000	21549000
Q9BL46	CAEEL M20_dimer domain-containing protein	CELE_Y71H2AM.11	tr|Q9BL46|Q9BL46_CAEEL M20_dimer domain-containing protein OS=Caenorhabditis elegans OX=6239 GN=CELE_Y71H2AM.11 PE=1 SV=4	1	1	1	3	52.25	472	3	0	8102400	0
Q9BPN8	CAEEL Uncharacterized protein Y92H12BR.3	Y92H12BR.3	sp|Q9BPN8|Y92H3_CAEEL Uncharacterized protein Y92H12BR.3 OS=Caenorhabditis elegans OX=6239 GN=Y92H12BR.3 PE=1 SV=2	1	1	1	1.9	71.086	637	1.9	0	2702100	0
Q9GZE9	CAEEL Lipid droplet localized protein	ldp-1	sp|Q9GZE9|LDP1_CAEEL Lipid droplet localized protein OS=Caenorhabditis elegans OX=6239 GN=ldp-1 PE=1 SV=1	1	1	1	2.1	47.293	426	2.1	0	25391000	0
V6CIZ1;V6CLC6;Q9GZH3	CAEEL CBS domain-containing protein	CELE_T22D1.3	tr|V6CIZ1|V6CIZ1_CAEEL CBS domain-containing protein OS=Caenorhabditis elegans OX=6239 GN=CELE_T22D1.3 PE=1 SV=1;tr|V6CLC6|V6CLC6_CAEEL Inosine-5-monophosphate dehydrogenase OS=Caenorhabditis elegans OX=6239 GN=CELE_T22D1.3 PE=1 SV=1;sp|Q9GZH3|IMDH_CAEEL	3	1	1	2.7	36.699	338	2.7	0	7319000	0
Q9GZH5	CAEEL 26S proteasome non-ATPase regulatory subunit 2	rpn-1	tr|Q9GZH5|Q9GZH5_CAEEL 26S proteasome non-ATPase regulatory subunit 2 OS=Caenorhabditis elegans OX=6239 GN=rpn-1 PE=1 SV=1	1	1	1	0.9	107.38	981	0.9	0.9	97784000	49297000
V6CK48;Q9N302;V6CLI5	CAEEL AMP-binding domain-containing protein	acs-13	tr|V6CK48|V6CK48_CAEEL AMP-binding domain-containing protein OS=Caenorhabditis elegans OX=6239 GN=acs-13 PE=1 SV=1;tr|Q9N302|Q9N302_CAEEL AMP-binding domain-containing protein OS=Caenorhabditis elegans OX=6239 GN=acs-13 PE=1 SV=1;tr|V6CLI5|V6CLI5_CAEEL AMP	3	1	1	1.6	74.568	676	1.6	0	8171400	0
Q9N4G8	CAEEL Receptor expression-enhancing protein	yop-1	tr|Q9N4G8|Q9N4G8_CAEEL Receptor expression-enhancing protein OS=Caenorhabditis elegans OX=6239 GN=yop-1 PE=1 SV=1	1	1	1	4.4	20.564	183	4.4	4.4	56167000	29875000
Q9N4J2	CAEEL Vitellogenin-3	vit-3	sp|Q9N4J2|VIT3_CAEEL Vitellogenin-3 OS=Caenorhabditis elegans OX=6239 GN=vit-3 PE=1 SV=1	1	12	1	6.8	186.53	1603	6.8	2.1	9046300	0
Q9N4J8	CAEEL T-complex protein 1 subunit gamma	cct-3	sp|Q9N4J8|TCPG_CAEEL T-complex protein 1 subunit gamma OS=Caenorhabditis elegans OX=6239 GN=cct-3 PE=3 SV=3	1	1	1	1.7	60.457	543	1.7	0	16321000	0
V6CM05;Q9N4T5	CAEEL OTU domain-containing protein	otub-2	tr|V6CM05|V6CM05_CAEEL OTU domain-containing protein OS=Caenorhabditis elegans OX=6239 GN=otub-2 PE=4 SV=1;tr|Q9N4T5|Q9N4T5_CAEEL OTU domain-containing protein OS=Caenorhabditis elegans OX=6239 GN=otub-2 PE=4 SV=2	2	1	1	2.4	56.275	499	0	2.4	0	0
Q9N5B3	CAEEL Peptidase_M24 domain-containing protein	CELE_W08E12.7	tr|Q9N5B3|Q9N5B3_CAEEL Peptidase_M24 domain-containing protein OS=Caenorhabditis elegans OX=6239 GN=CELE_W08E12.7 PE=1 SV=1	1	1	1	2	43.032	391	2	2	156670000	187590000
Q9N5V3	CAEEL Importin N-terminal domain-containing protein	imb-3	tr|Q9N5V3|Q9N5V3_CAEEL Importin N-terminal domain-containing protein OS=Caenorhabditis elegans OX=6239 GN=imb-3 PE=1 SV=2	1	1	1	1	122.03	1092	1	0	7225600	0
Q9N5Y2	CAEEL Probable very-long-chain enoyl-CoA reductase art-1	art-1	sp|Q9N5Y2|TECR_CAEEL Probable very-long-chain enoyl-CoA reductase art-1 OS=Caenorhabditis elegans OX=6239 GN=art-1 PE=3 SV=1	1	1	1	3.2	35.109	308	3.2	0	5616800	0
Q9NA78	CAEEL Thioredoxin domain-containing protein	txdc-12.1	tr|Q9NA78|Q9NA78_CAEEL Thioredoxin domain-containing protein OS=Caenorhabditis elegans OX=6239 GN=txdc-12.1 PE=1 SV=1	1	1	1	4.8	21.467	186	4.8	0	13788000	0
Q9NA98	CAEEL Actin-Related Proteins	arp-1	tr|Q9NA98|Q9NA98_CAEEL Actin-Related Proteins OS=Caenorhabditis elegans OX=6239 GN=arp-1 PE=1 SV=2	1	1	1	2.7	42.071	374	2.7	0	18914000	0
Q9NAH4	CAEEL Density-regulated protein homolog	Y47D3A.21	sp|Q9NAH4|DENR_CAEEL Density-regulated protein homolog OS=Caenorhabditis elegans OX=6239 GN=Y47D3A.21 PE=3 SV=1	1	1	1	7.3	20.349	192	7.3	0	29749000	0
Q9NEU2	CAEEL Protein SDA1 homolog	pro-3	sp|Q9NEU2|SDA1_CAEEL Protein SDA1 homolog OS=Caenorhabditis elegans OX=6239 GN=pro-3 PE=1 SV=4	1	1	1	1.2	92.13	801	1.2	0	0	0
Q9TXR4	CAEEL DNA_MISMATCH_REPAIR_2 domain-containing protein	msh-2	tr|Q9TXR4|Q9TXR4_CAEEL DNA_MISMATCH_REPAIR_2 domain-containing protein OS=Caenorhabditis elegans OX=6239 GN=msh-2 PE=1 SV=1	1	1	1	1.2	95.853	849	1.2	0	0	0
Q9TXZ9	CAEEL YKT6 (Yeast v-SNARE) homolog	ykt-6	tr|Q9TXZ9|Q9TXZ9_CAEEL YKT6 (Yeast v-SNARE) homolog OS=Caenorhabditis elegans OX=6239 GN=ykt-6 PE=1 SV=1	1	1	1	5	23.15	201	5	0	0	0
Q9TYL9	CAEEL Coatomer subunit beta	copb-1	tr|Q9TYL9|Q9TYL9_CAEEL Coatomer subunit beta OS=Caenorhabditis elegans OX=6239 GN=copb-1 PE=1 SV=1	1	1	1	1	107.53	971	1	0	11851000	0
Q9TZ51	CAEEL Fatty Acid/Retinol binding protein	far-7	tr|Q9TZ51|Q9TZ51_CAEEL Fatty Acid/Retinol binding protein OS=Caenorhabditis elegans OX=6239 GN=far-7 PE=1 SV=1	1	1	1	7.2	15.375	138	7.2	0	6753100	0
Q9TZ69	CAEEL UBIQUITIN_CONJUGAT_2 domain-containing protein	ubc-20	tr|Q9TZ69|Q9TZ69_CAEEL UBIQUITIN_CONJUGAT_2 domain-containing protein OS=Caenorhabditis elegans OX=6239 GN=ubc-20 PE=1 SV=1	1	1	1	4.5	22.29	199	4.5	0	5474600	0
Q9U2X0	CAEEL Protein arginine N-methyltransferase 1	prmt-1	sp|Q9U2X0|ANM1_CAEEL Protein arginine N-methyltransferase 1 OS=Caenorhabditis elegans OX=6239 GN=prmt-1 PE=1 SV=1	1	1	1	3.4	39.771	348	3.4	3.4	0	4367400
Q9U315	CAEEL DUF4440 domain-containing protein	CELE_Y105C5B.5	tr|Q9U315|Q9U315_CAEEL DUF4440 domain-containing protein OS=Caenorhabditis elegans OX=6239 GN=CELE_Y105C5B.5 PE=1 SV=1	1	1	1	7.1	14.124	127	7.1	7.1	17567000	71849000
Q9U354	CAEEL Related to yeast Vacuolar Protein Sorting factor	vps-25	tr|Q9U354|Q9U354_CAEEL Related to yeast Vacuolar Protein Sorting factor OS=Caenorhabditis elegans OX=6239 GN=vps-25 PE=1 SV=1	1	1	1	6	21.473	183	6	6	6321300	3946400
Q9U3C8	CAEEL Defective in cullin neddylation protein 1	dcn-1	sp|Q9U3C8|DCN1_CAEEL Defective in cullin neddylation protein 1 OS=Caenorhabditis elegans OX=6239 GN=dcn-1 PE=1 SV=2	1	1	1	4.1	34.133	295	4.1	0	5049600	0
Q9U3F4	CAEEL Zyxin	zyx-1	sp|Q9U3F4|ZYX_CAEEL Zyxin OS=Caenorhabditis elegans OX=6239 GN=zyx-1 PE=1 SV=1	1	1	1	1.5	66.774	603	1.5	0	69673000	0
Q9XTT9	CAEEL 26S proteasome regulatory subunit 8	rpt-6	sp|Q9XTT9|PRS8_CAEEL 26S proteasome regulatory subunit 8 OS=Caenorhabditis elegans OX=6239 GN=rpt-6 PE=1 SV=1	1	1	1	3.1	46.249	416	3.1	3.1	16553000	0
Q9XUY0	CAEEL Uncharacterized protein	CELE_F56G4.6	tr|Q9XUY0|Q9XUY0_CAEEL Uncharacterized protein OS=Caenorhabditis elegans OX=6239 GN=CELE_F56G4.6 PE=1 SV=3	1	1	1	1.5	97.093	843	1.5	0	2913500	0
Q9XV73	CAEEL F-box domain-containing protein	CELE_F21D9.1	tr|Q9XV73|Q9XV73_CAEEL F-box domain-containing protein OS=Caenorhabditis elegans OX=6239 GN=CELE_F21D9.1 PE=4 SV=1	1	1	1	5.4	44.231	367	5.4	0	12731000	0
Q9XVK5	CAEEL NEDD8-conjugating enzyme ubc-12	ubc-12	sp|Q9XVK5|UBC12_CAEEL NEDD8-conjugating enzyme ubc-12 OS=Caenorhabditis elegans OX=6239 GN=ubc-12 PE=2 SV=1	1	1	1	5	21.101	180	5	5	12143000	14498000
Q9XVR9	CAEEL Uncharacterized protein	C25A1.15	tr|Q9XVR9|Q9XVR9_CAEEL Uncharacterized protein OS=Caenorhabditis elegans OX=6239 GN=C25A1.15 PE=4 SV=1	1	1	1	13.2	10.636	91	13.2	0	4878800	0
Q9XW17	CAEEL Cytokinesis, Apoptosis, RNA-associated	car-1	tr|Q9XW17|Q9XW17_CAEEL Cytokinesis, Apoptosis, RNA-associated OS=Caenorhabditis elegans OX=6239 GN=car-1 PE=1 SV=1	1	1	1	5	37.61	340	5	5	20242000	12083000
Q9XW20	CAEEL Uncharacterized protein	CELE_Y18D10A.11	tr|Q9XW20|Q9XW20_CAEEL Uncharacterized protein OS=Caenorhabditis elegans OX=6239 GN=CELE_Y18D10A.11 PE=1 SV=1	1	1	1	3.6	27.963	248	3.6	0	49182000	0
Q9XWD1	CAEEL Fatty Acid CoA Synthetase family	acs-5	tr|Q9XWD1|Q9XWD1_CAEEL Fatty Acid CoA Synthetase family OS=Caenorhabditis elegans OX=6239 GN=acs-5 PE=1 SV=1	1	1	1	1.6	75.759	687	1.6	0	5591500	0
Q9XWM1	CAEEL Ig-like domain-containing protein	oig-2	tr|Q9XWM1|Q9XWM1_CAEEL Ig-like domain-containing protein OS=Caenorhabditis elegans OX=6239 GN=oig-2 PE=1 SV=1	1	1	1	10.2	12.182	108	10.2	0	38437000	0
Q9XWP1	CAEEL Uncharacterized protein	CELE_Y43F8C.7	tr|Q9XWP1|Q9XWP1_CAEEL Uncharacterized protein OS=Caenorhabditis elegans OX=6239 GN=CELE_Y43F8C.7 PE=1 SV=1	1	1	1	5.5	26.331	236	5.5	0	5847500	0
Q9XWS4	CAEEL Ribosomal_L7Ae domain-containing protein	rpl-30	tr|Q9XWS4|Q9XWS4_CAEEL Ribosomal_L7Ae domain-containing protein OS=Caenorhabditis elegans OX=6239 GN=rpl-30 PE=1 SV=2	1	1	1	7	12.437	115	7	7	57590000	52532000
Q9XWS6	CAEEL Uncharacterized protein	CELE_Y62H9A.5	tr|Q9XWS6|Q9XWS6_CAEEL Uncharacterized protein OS=Caenorhabditis elegans OX=6239 GN=CELE_Y62H9A.5 PE=1 SV=2	1	1	1	4.2	18.496	165	0	4.2	0	79508000
Q9XWU2	CAEEL Protein SUP-1	sup-1	sp|Q9XWU2|SUP1_CAEEL Protein SUP-1 OS=Caenorhabditis elegans OX=6239 GN=sup-1 PE=1 SV=1	1	1	1	9.7	11.31	103	9.7	0	72235000	0
Q9XWU9	CAEEL Uncharacterized protein	CELE_Y37D8A.19	tr|Q9XWU9|Q9XWU9_CAEEL Uncharacterized protein OS=Caenorhabditis elegans OX=6239 GN=CELE_Y37D8A.19 PE=1 SV=1	1	1	1	10.9	10.302	101	10.9	10.9	8346000	23072000
Q9XWZ2	CAEEL Acyl-CoA dehydrogenase family member 11	acdh-11	sp|Q9XWZ2|ACD11_CAEEL Acyl-CoA dehydrogenase family member 11 OS=Caenorhabditis elegans OX=6239 GN=acdh-11 PE=1 SV=1	1	1	1	1.8	68.291	617	1.8	0	13806000	0
Q9XXU9	CAEEL V-type proton ATPase subunit C	vha-11	sp|Q9XXU9|VATC_CAEEL V-type proton ATPase subunit C OS=Caenorhabditis elegans OX=6239 GN=vha-11 PE=2 SV=1	1	1	1	2.6	43.458	384	2.6	0	2045800	0
Q9XZI6	CAEEL Phosphatidylinositol-binding clathrin assembly protein unc-11	unc-11	sp|Q9XZI6|PICAL_CAEEL Phosphatidylinositol-binding clathrin assembly protein unc-11 OS=Caenorhabditis elegans OX=6239 GN=unc-11 PE=1 SV=1	1	1	1	1.5	64.063	586	1.5	0	0	0
Q9Y041	CAEEL Homogentisate 1,2-dioxygenase	hgo-1	sp|Q9Y041|HGD_CAEEL Homogentisate 1,2-dioxygenase OS=Caenorhabditis elegans OX=6239 GN=hgo-1 PE=2 SV=2	1	1	1	3.2	49.238	437	3.2	0	17465000	0
W6RQZ3	CAEEL Nitrogen Permease Regulator Like homolog	nprl-2	tr|W6RQZ3|W6RQZ3_CAEEL Nitrogen Permease Regulator Like homolog OS=Caenorhabditis elegans OX=6239 GN=nprl-2 PE=1 SV=2	1	1	1	2.2	51.808	451	2.2	0	5534300	0
X5MK34	CAEEL UBA domain-containing protein	spe-48	tr|X5MK34|X5MK34_CAEEL UBA domain-containing protein OS=Caenorhabditis elegans OX=6239 GN=spe-48 PE=1 SV=1	1	1	1	12	8.3617	75	12	0	201010000	0
P18947	CAEEL Vitellogenin-4	vit-4	sp|P18947|VIT4_CAEEL Vitellogenin-4 OS=Caenorhabditis elegans OX=6239 GN=vit-4 PE=1 SV=3	1	12	0	6.8	186.31	1603	6.8	1.7	14249000	51995000

## Sheet: HSP-FLAG
Protein IDs	Protein names	Gene names	Fasta headers	Number of proteins	Peptides	Unique peptides	Sequence coverage [%]	Mol. weight [kDa]	Sequence length	Sequence coverage R1528-HSP [%]	Sequence coverage R1528-HSP-FLAG [%]	LFQ intensity R1528-HSP	LFQ intensity R1528-HSP-FLAG
A0A486WXP6;G5EEF0;A0A486WVH0;A0A486WUR9;H2FLL0;H2FLK8;H2FLL1;G5EDH9;H2FLK6;A0A486WTP6;H2FLK9;H2FLK7;A0A486WWP8;A0A486WVD1;G5EFU3;H2FLK4;H2FLK3;H2FLK5;F5GUH5;G5EGB8;G5EBW6	CAEEL Plant Late Embryo Abundant (LEA) related	lea-1	tr|A0A486WXP6|A0A486WXP6_CAEEL Plant Late Embryo Abundant (LEA) related OS=Caenorhabditis elegans OX=6239 GN=lea-1 PE=1 SV=1;tr|G5EEF0|G5EEF0_CAEEL Plant Late Embryo Abundant (LEA) related OS=Caenorhabditis elegans OX=6239 GN=lea-1 PE=1 SV=1;tr|A0A486WVH0|	21	18	18	16.3	131.57	1250	15.5	11.8	541870000	1885700000
P05690;P55155	CAEEL Vitellogenin-2	vit-2	sp|P05690|VIT2_CAEEL Vitellogenin-2 OS=Caenorhabditis elegans OX=6239 GN=vit-2 PE=1 SV=5;sp|P55155|VIT1_CAEEL Vitellogenin-1 OS=Caenorhabditis elegans OX=6239 GN=vit-1 PE=1 SV=2	2	11	11	6.3	187.72	1613	6.3	3.2	2593200000	1429200000
P18948	CAEEL Vitellogenin-6	vit-6	sp|P18948|VIT6_CAEEL Vitellogenin-6 OS=Caenorhabditis elegans OX=6239 GN=vit-6 PE=1 SV=5	1	10	10	6.1	193.32	1651	6.1	1.3	825600000	76000000
Q18100;Q53U86;Q4PIU9;Q53U87;W6RTH3;W6RRX6	CAEEL Fibronectin type-III domain-containing protein	sax-7	tr|Q18100|Q18100_CAEEL Fibronectin type-III domain-containing protein OS=Caenorhabditis elegans OX=6239 GN=sax-7 PE=1 SV=3;tr|Q53U86|Q53U86_CAEEL Fibronectin type-III domain-containing protein OS=Caenorhabditis elegans OX=6239 GN=sax-7 PE=1 SV=1;tr|Q4PIU9|	6	9	9	8.3	127.62	1144	8.3	1.6	807770000	246200000
Q18688	CAEEL Heat shock protein 90	daf-21	sp|Q18688|HSP90_CAEEL Heat shock protein 90 OS=Caenorhabditis elegans OX=6239 GN=daf-21 PE=1 SV=1	1	9	8	13	80.282	702	11.1	6	724300000	89317000
P02566	CAEEL Myosin-4	unc-54	sp|P02566|MYO4_CAEEL Myosin-4 OS=Caenorhabditis elegans OX=6239 GN=unc-54 PE=1 SV=2	1	7	7	4.2	224.75	1963	4.2	0.5	110590000	35591000
P29691	CAEEL Elongation factor 2	eef-2	sp|P29691|EF2_CAEEL Elongation factor 2 OS=Caenorhabditis elegans OX=6239 GN=eef-2 PE=1 SV=4	1	7	7	8.7	94.795	852	8.7	1.2	362820000	11460000
P90735;Q27461;G5EFV6	CAEEL Sodium/potassium-transporting ATPase subunit alpha	eat-6	tr|P90735|P90735_CAEEL Sodium/potassium-transporting ATPase subunit alpha OS=Caenorhabditis elegans OX=6239 GN=eat-6 PE=1 SV=1;tr|Q27461|Q27461_CAEEL Sodium/potassium-transporting ATPase subunit alpha OS=Caenorhabditis elegans OX=6239 GN=eat-6 PE=3 SV=1	3	7	7	7.4	111	996	7.4	1.9	360650000	103240000
G5ED07	CAEEL Protein disulfide-isomerase	pdi-3	tr|G5ED07|G5ED07_CAEEL Protein disulfide-isomerase OS=Caenorhabditis elegans OX=6239 GN=pdi-3 PE=1 SV=1	1	6	6	12.7	54.92	488	12.7	3.3	365400000	607360000
O76512	CAEEL Regulator of nonsense transcripts 1	smg-2	sp|O76512|RENT1_CAEEL Regulator of nonsense transcripts 1 OS=Caenorhabditis elegans OX=6239 GN=smg-2 PE=1 SV=1	1	6	6	5	120.02	1069	5	1.5	218320000	384200000
P34574	CAEEL Probable clathrin heavy chain 1	chc-1	sp|P34574|CLH_CAEEL Probable clathrin heavy chain 1 OS=Caenorhabditis elegans OX=6239 GN=chc-1 PE=1 SV=1	1	6	6	3.4	191.54	1681	3.4	0.5	168820000	35865000
Q94271	CAEEL Peptidase A1 domain-containing protein	asp-14	tr|Q94271|Q94271_CAEEL Peptidase A1 domain-containing protein OS=Caenorhabditis elegans OX=6239 GN=asp-14 PE=1 SV=2	1	6	6	16.4	39.717	366	10.9	7.7	1570000000	2644100000
P09446;P20163;P27420	CAEEL Heat shock 70 kDa protein A	hsp-1	sp|P09446|HSP7A_CAEEL Heat shock 70 kDa protein A OS=Caenorhabditis elegans OX=6239 GN=hsp-1 PE=1 SV=2	3	6	5	7.8	69.722	640	5.8	4.4	299080000	688620000
Q7JPI2;Q19866;Q18907	CAEEL Suppressor of forked homolog	suf-1	tr|Q7JPI2|Q7JPI2_CAEEL Suppressor of forked homolog OS=Caenorhabditis elegans OX=6239 GN=suf-1 PE=2 SV=1;tr|Q19866|Q19866_CAEEL Suf domain-containing protein OS=Caenorhabditis elegans OX=6239 GN=suf-1 PE=1 SV=1;tr|Q18907|Q18907_CAEEL Cleavage stimulation f	3	5	5	6.8	84.145	730	6.8	2.2	1074700000	422170000
Q8WQD8;Q21614	CAEEL Alpha-carbonic anhydrase domain-containing protein	cah-4	tr|Q8WQD8|Q8WQD8_CAEEL Alpha-carbonic anhydrase domain-containing protein OS=Caenorhabditis elegans OX=6239 GN=cah-4 PE=1 SV=1;tr|Q21614|Q21614_CAEEL Alpha-carbonic anhydrase domain-containing protein OS=Caenorhabditis elegans OX=6239 GN=cah-4 PE=1 SV=3	2	5	5	17	26.17	235	17	8.9	1588800000	992490000
Q23621	CAEEL Glutamate dehydrogenase	gdh-1	tr|Q23621|Q23621_CAEEL Glutamate dehydrogenase OS=Caenorhabditis elegans OX=6239 GN=gdh-1 PE=1 SV=1	1	5	5	10.4	58.794	536	10.4	3.4	343100000	334220000
Q966I7;Q8MXU9	CAEEL CCHC-type domain-containing protein	CELE_K08D12.3	tr|Q966I7|Q966I7_CAEEL CCHC-type domain-containing protein OS=Caenorhabditis elegans OX=6239 GN=CELE_K08D12.3 PE=1 SV=1	2	5	5	32.5	15.557	151	32.5	32.5	779570000	1116200000
G5ECU3;P40614	CAEEL Phosphate carrier protein, mitochondrial	CELE_F01G4.6	tr|G5ECU3|G5ECU3_CAEEL Phosphate carrier protein, mitochondrial OS=Caenorhabditis elegans OX=6239 GN=CELE_F01G4.6 PE=1 SV=1;sp|P40614|MPCP_CAEEL Phosphate carrier protein, mitochondrial OS=Caenorhabditis elegans OX=6239 GN=F01G4.6 PE=2 SV=1	2	4	4	10.9	42.09	387	8.5	2.3	74681000	0
O44400	CAEEL Protein F37C4.5	F37C4.5	sp|O44400|F37C4_CAEEL Protein F37C4.5 OS=Caenorhabditis elegans OX=6239 GN=F37C4.5 PE=1 SV=3	1	4	4	7	61.443	556	7	1.4	101520000	78106000
O45934	CAEEL Uncharacterized protein	CELE_Y43F4B.5	tr|O45934|O45934_CAEEL Uncharacterized protein OS=Caenorhabditis elegans OX=6239 GN=CELE_Y43F4B.5 PE=1 SV=1	1	4	4	6.1	66.586	595	4.5	1.5	99752000	0
Q6A8K1;P10986;P10984;P0DM42;P0DM41;Q95ZL1	CAEEL Actin-4	act-4	tr|Q6A8K1|Q6A8K1_CAEEL Actin-4 OS=Caenorhabditis elegans OX=6239 GN=act-4 PE=1 SV=1;sp|P10986|ACT4_CAEEL Actin-4 OS=Caenorhabditis elegans OX=6239 GN=act-4 PE=3 SV=2;sp|P10984|ACT2_CAEEL Actin-2 OS=Caenorhabditis elegans OX=6239 GN=act-2 PE=3 SV=3;sp|P0DM4	6	6	4	22.9	40.426	362	22.9	8.6	1856300000	268000000
P54216	CAEEL Fructose-bisphosphate aldolase 1	aldo-1	sp|P54216|ALF1_CAEEL Fructose-bisphosphate aldolase 1 OS=Caenorhabditis elegans OX=6239 GN=aldo-1 PE=1 SV=1	1	4	4	10.1	39.24	366	10.1	1.9	188230000	114780000
P54412	CAEEL Probable elongation factor 1-gamma	eef-1G	sp|P54412|EF1G_CAEEL Probable elongation factor 1-gamma OS=Caenorhabditis elegans OX=6239 GN=eef-1G PE=1 SV=1	1	4	4	12.3	44.387	398	12.3	2.5	160760000	203400000
Q9N358;U4PBK9	CAEEL T-complex protein 1 subunit theta	cct-8	sp|Q9N358|TCPQ_CAEEL T-complex protein 1 subunit theta OS=Caenorhabditis elegans OX=6239 GN=cct-8 PE=1 SV=3;tr|U4PBK9|U4PBK9_CAEEL T-complex protein 1 subunit theta OS=Caenorhabditis elegans OX=6239 GN=cct-8 PE=1 SV=1	2	4	4	6.9	59.733	548	6.9	3.1	182320000	140000000
Q9XW92	CAEEL V-type proton ATPase catalytic subunit A	vha-13	sp|Q9XW92|VATA_CAEEL V-type proton ATPase catalytic subunit A OS=Caenorhabditis elegans OX=6239 GN=vha-13 PE=1 SV=3	1	4	4	9.4	66.459	606	5.9	3.5	106960000	0
A0A061ACR1;Q2XN02;F5GUA3;Q22498	CAEEL Coatomer subunit gamma	copg-1	tr|A0A061ACR1|A0A061ACR1_CAEEL Coatomer subunit gamma OS=Caenorhabditis elegans OX=6239 GN=copg-1 PE=1 SV=1;tr|Q2XN02|Q2XN02_CAEEL Coatomer subunit gamma OS=Caenorhabditis elegans OX=6239 GN=copg-1 PE=1 SV=1;tr|F5GUA3|F5GUA3_CAEEL Coatomer subunit gamma OS	4	3	3	3.8	96.57	872	3.8	1	36325000	0
O45148	CAEEL Lipoyl-binding domain-containing protein	dlst-1	tr|O45148|O45148_CAEEL Lipoyl-binding domain-containing protein OS=Caenorhabditis elegans OX=6239 GN=dlst-1 PE=1 SV=2	1	3	3	7.1	49.813	463	7.1	3.2	904970000	24524000
P41932;N1NV25	CAEEL 14-3-3-like protein 1	par-5	sp|P41932|14331_CAEEL 14-3-3-like protein 1 OS=Caenorhabditis elegans OX=6239 GN=par-5 PE=1 SV=2	2	5	3	19.4	28.19	248	19.4	10.1	543320000	155900000
P48152	CAEEL 40S ribosomal protein S3	rps-3	sp|P48152|RS3_CAEEL 40S ribosomal protein S3 OS=Caenorhabditis elegans OX=6239 GN=rps-3 PE=3 SV=1	1	3	3	9.7	27.313	247	9.7	3.2	55513000	240850000
P50140;G8JYF5;Q9U3B0;V6CLG8	CAEEL Chaperonin homolog Hsp-60, mitochondrial	hsp-60	sp|P50140|CH60_CAEEL Chaperonin homolog Hsp-60, mitochondrial OS=Caenorhabditis elegans OX=6239 GN=hsp-60 PE=2 SV=2;tr|G8JYF5|G8JYF5_CAEEL Chaperonin homolog Hsp-60, mitochondrial OS=Caenorhabditis elegans OX=6239 GN=hsp-60 PE=1 SV=1	4	3	3	6.9	60.1	568	6.9	2.1	16353000	5754500
P53013	CAEEL Elongation factor 1-alpha	eft-3	sp|P53013|EF1A_CAEEL Elongation factor 1-alpha OS=Caenorhabditis elegans OX=6239 GN=eft-3 PE=3 SV=1	1	3	3	6.7	50.668	463	4.3	5	226810000	67774000
Q03604	CAEEL Ribonucleoside-diphosphate reductase large subunit	rnr-1	sp|Q03604|RIR1_CAEEL Ribonucleoside-diphosphate reductase large subunit OS=Caenorhabditis elegans OX=6239 GN=rnr-1 PE=3 SV=1	1	3	3	3.2	88.969	788	3.2	3.2	108910000	107220000
Q09544	CAEEL ATP synthase subunit delta, mitochondrial	F58F12.1	sp|Q09544|ATPD_CAEEL ATP synthase subunit delta, mitochondrial OS=Caenorhabditis elegans OX=6239 GN=F58F12.1 PE=1 SV=1	1	3	3	16.6	16.927	163	16.6	11	159710000	462710000
Q17770	CAEEL Protein disulfide-isomerase 2	pdi-2	sp|Q17770|PDI2_CAEEL Protein disulfide-isomerase 2 OS=Caenorhabditis elegans OX=6239 GN=pdi-2 PE=1 SV=1	1	3	3	5.7	55.152	493	5.7	1.6	310010000	14378000
Q20363	CAEEL Stress-induced protein 1	sip-1	sp|Q20363|SIP1_CAEEL Stress-induced protein 1 OS=Caenorhabditis elegans OX=6239 GN=sip-1 PE=1 SV=1	1	3	3	17	17.839	159	17	5	302970000	939370000
Q20780;Q8IG19	CAEEL Aldedh domain-containing protein	alh-1	tr|Q20780|Q20780_CAEEL Aldedh domain-containing protein OS=Caenorhabditis elegans OX=6239 GN=alh-1 PE=1 SV=3	2	3	3	6.1	55.058	510	6.1	2	266970000	300330000
Q21770;D9N120	CAEEL Argonaute protein wago-1	wago-1	sp|Q21770|WAGO1_CAEEL Argonaute protein wago-1 OS=Caenorhabditis elegans OX=6239 GN=wago-1 PE=1 SV=1	2	3	3	3.3	105.44	945	3.3	0.7	45104000	795250000
Q22993	CAEEL Phosphoethanolamine MethylTransferase	pmt-2	tr|Q22993|Q22993_CAEEL Phosphoethanolamine MethylTransferase OS=Caenorhabditis elegans OX=6239 GN=pmt-2 PE=1 SV=1	1	3	3	6.4	49.768	437	6.4	1.8	72471000	246680000
Q8T8N8;Q9BIC3;Q9GYT0	CAEEL Enoyl-CoA Hydratase	ech-1.2	tr|Q8T8N8|Q8T8N8_CAEEL Enoyl-CoA Hydratase OS=Caenorhabditis elegans OX=6239 GN=ech-1.2 PE=1 SV=1;tr|Q9BIC3|Q9BIC3_CAEEL Enoyl-CoA Hydratase OS=Caenorhabditis elegans OX=6239 GN=ech-1.2 PE=1 SV=1;tr|Q9GYT0|Q9GYT0_CAEEL Enoyl-CoA Hydratase OS=Caenorhabditis	3	3	3	3.9	75.618	697	3.9	1.3	59061000	28707000
Q95X44	CAEEL Vacuolar H ATPase	vha-8	tr|Q95X44|Q95X44_CAEEL Vacuolar H ATPase OS=Caenorhabditis elegans OX=6239 GN=vha-8 PE=1 SV=1	1	3	3	12.4	25.586	226	12.4	7.5	126810000	210590000
Q9XWD6	CAEEL Cell death abnormality protein 1	ced-1	sp|Q9XWD6|CED1_CAEEL Cell death abnormality protein 1 OS=Caenorhabditis elegans OX=6239 GN=ced-1 PE=1 SV=1	1	3	3	3.9	118.8	1111	0.8	3.9	30316000	207810000000
A7LPE6;P34517;A7LPE5;Q7JMU1	CAEEL Glycerol-3-phosphate dehydrogenase [NAD(+)]	gpdh-2	tr|A7LPE6|A7LPE6_CAEEL Glycerol-3-phosphate dehydrogenase [NAD(+)] OS=Caenorhabditis elegans OX=6239 GN=gpdh-2 PE=1 SV=1;sp|P34517|GPDH2_CAEEL Probable glycerol-3-phosphate dehydrogenase 2 OS=Caenorhabditis elegans OX=6239 GN=gpdh-2 PE=3 SV=2;tr|A7LPE5|A7L	4	2	2	4.7	39.281	360	4.7	2.5	32029000	0
C0HLB4;C0HLB3	CAEEL V-type proton ATPase 16 kDa proteolipid subunit 3	vha-3	sp|C0HLB4|VATL3_CAEEL V-type proton ATPase 16 kDa proteolipid subunit 3 OS=Caenorhabditis elegans OX=6239 GN=vha-3 PE=2 SV=1;sp|C0HLB3|VATL2_CAEEL V-type proton ATPase 16 kDa proteolipid subunit 2 OS=Caenorhabditis elegans OX=6239 GN=vha-2 PE=2 SV=1	2	2	2	13	16.409	161	13	5.6	84980000	80994000
G1K101;G1K104	CAEEL SNF2_N domain-containing protein	CELE_M04C3.2	tr|G1K101|G1K101_CAEEL SNF2_N domain-containing protein OS=Caenorhabditis elegans OX=6239 GN=CELE_M04C3.2 PE=1 SV=1;tr|G1K104|G1K104_CAEEL SNF2_N domain-containing protein OS=Caenorhabditis elegans OX=6239 GN=CELE_M04C3.2 PE=1 SV=1	2	2	2	7.1	67.558	578	1.7	5.4	25286000	0
G5EDV7	CAEEL Uncharacterized protein	CELE_Y53H1B.2	tr|G5EDV7|G5EDV7_CAEEL Uncharacterized protein OS=Caenorhabditis elegans OX=6239 GN=CELE_Y53H1B.2 PE=1 SV=1	1	2	2	9.5	25.731	222	9.5	4.5	14502000	15630000
G5EE04	CAEEL TPR_REGION domain-containing protein	hip-1	tr|G5EE04|G5EE04_CAEEL TPR_REGION domain-containing protein OS=Caenorhabditis elegans OX=6239 GN=hip-1 PE=1 SV=1	1	2	2	4	44.744	422	1.9	2.1	0	41727000
G5EEV5	CAEEL 5C820	pud-3	tr|G5EEV5|G5EEV5_CAEEL 5C820 OS=Caenorhabditis elegans OX=6239 GN=pud-3 PE=1 SV=1	1	2	2	15.1	19.437	172	15.1	8.7	30182000	14600000
I7FW32;Q9UAQ6	CAEEL Rab-1 (Fragment)	rab-1	tr|I7FW32|I7FW32_CAEEL Rab-1 (Fragment) OS=Caenorhabditis elegans OX=6239 GN=rab-1 PE=2 SV=1;tr|Q9UAQ6|Q9UAQ6_CAEEL RAB family OS=Caenorhabditis elegans OX=6239 GN=rab-1 PE=1 SV=1	2	2	2	11.8	22.414	204	11.8	4.9	265560000	127780000
O01541	CAEEL Alanine--tRNA ligase, cytoplasmic	aars-2	sp|O01541|SYAC_CAEEL Alanine--tRNA ligase, cytoplasmic OS=Caenorhabditis elegans OX=6239 GN=aars-2 PE=2 SV=1	1	2	2	2.3	106.78	968	2.3	0.9	32272000	33888000
O02286;Q7JKI1;Q7JKI3;Q7JKI2	CAEEL Phosphoenolypyruvate CarboxyKinase	pck-2	tr|O02286|O02286_CAEEL Phosphoenolypyruvate CarboxyKinase OS=Caenorhabditis elegans OX=6239 GN=pck-2 PE=1 SV=1;tr|Q7JKI1|Q7JKI1_CAEEL Phosphoenolypyruvate CarboxyKinase OS=Caenorhabditis elegans OX=6239 GN=pck-2 PE=1 SV=1;tr|Q7JKI3|Q7JKI3_CAEEL Phosphoenol	4	2	2	2.6	73.431	654	2.6	2.6	335700000	183800000
O17328	CAEEL MFS domain-containing protein	mct-6	tr|O17328|O17328_CAEEL MFS domain-containing protein OS=Caenorhabditis elegans OX=6239 GN=mct-6 PE=1 SV=2	1	2	2	3.5	63.517	594	3.5	1.9	107690000	69439000
O17759	CAEEL Transket_pyr domain-containing protein	tkt-1	tr|O17759|O17759_CAEEL Transket_pyr domain-containing protein OS=Caenorhabditis elegans OX=6239 GN=tkt-1 PE=1 SV=1	1	2	2	3.2	66.01	618	3.2	1.5	75076000	106430000
O18650	CAEEL 40S ribosomal protein S19	rps-19	sp|O18650|RS19_CAEEL 40S ribosomal protein S19 OS=Caenorhabditis elegans OX=6239 GN=rps-19 PE=2 SV=1	1	2	2	11	16.322	146	11	11	121430000	135730000
O45577	CAEEL RRM domain-containing protein	cpf-2	tr|O45577|O45577_CAEEL RRM domain-containing protein OS=Caenorhabditis elegans OX=6239 GN=cpf-2 PE=1 SV=1	1	2	2	6.5	37.035	336	6.5	3	48549000	10870000
U4PC51;O61199	CAEEL Transket_pyr domain-containing protein	ogdh-1	tr|U4PC51|U4PC51_CAEEL Transket_pyr domain-containing protein OS=Caenorhabditis elegans OX=6239 GN=ogdh-1 PE=1 SV=1;sp|O61199|ODO1_CAEEL 2-oxoglutarate dehydrogenase, mitochondrial OS=Caenorhabditis elegans OX=6239 GN=ogdh-1 PE=1 SV=2	2	2	2	2.6	90.993	802	2.6	1.4	156950000	23604000
O61235;U4PE16;Q8MYL7;Q27487	CAEEL Catalase-2	ctl-1	sp|O61235|CATA2_CAEEL Catalase-2 OS=Caenorhabditis elegans OX=6239 GN=ctl-1 PE=1 SV=3;tr|U4PE16|U4PE16_CAEEL Catalase OS=Caenorhabditis elegans OX=6239 GN=ctl-3 PE=1 SV=1;tr|Q8MYL7|Q8MYL7_CAEEL Catalase OS=Caenorhabditis elegans OX=6239 GN=ctl-3 PE=1 SV=1;	4	2	2	5	57.304	497	5	2	41664000	32232000
P34339	CAEEL Eukaryotic translation initiation factor 3 subunit A	egl-45	sp|P34339|EIF3A_CAEEL Eukaryotic translation initiation factor 3 subunit A OS=Caenorhabditis elegans OX=6239 GN=egl-45 PE=3 SV=1	1	2	2	2	124.41	1076	2	0.9	39930000	84607000
P34540	CAEEL Kinesin heavy chain	unc-116	sp|P34540|KINH_CAEEL Kinesin heavy chain OS=Caenorhabditis elegans OX=6239 GN=unc-116 PE=2 SV=2	1	2	2	2.5	91.893	815	1.3	1.1	1352500	0
P34689;Q966L9	CAEEL ATP-dependent RNA helicase glh-1	glh-1	sp|P34689|GLH1_CAEEL ATP-dependent RNA helicase glh-1 OS=Caenorhabditis elegans OX=6239 GN=glh-1 PE=1 SV=3;sp|Q966L9|GLH2_CAEEL ATP-dependent RNA helicase glh-2 OS=Caenorhabditis elegans OX=6239 GN=glh-2 PE=1 SV=1	2	2	2	2.5	79.779	763	2.5	1	98807000	155430000
P34696;Q21062	CAEEL Heat shock protein Hsp-16.1/Hsp-16.11	hsp-16.1	sp|P34696|HSP11_CAEEL Heat shock protein Hsp-16.1/Hsp-16.11 OS=Caenorhabditis elegans OX=6239 GN=hsp-16.1 PE=2 SV=1;tr|Q21062|Q21062_CAEEL Heat shock protein 16-1 OS=Caenorhabditis elegans OX=6239 PE=3 SV=1	2	2	2	18.6	16.253	145	0	18.6	0	63691000
P46563;G8JY45	CAEEL Fructose-bisphosphate aldolase 2	aldo-2	sp|P46563|ALF2_CAEEL Fructose-bisphosphate aldolase 2 OS=Caenorhabditis elegans OX=6239 GN=aldo-2 PE=2 SV=1;tr|G8JY45|G8JY45_CAEEL Fructose-bisphosphate aldolase OS=Caenorhabditis elegans OX=6239 GN=aldo-2 PE=1 SV=1	2	2	2	4.6	38.846	366	4.6	4.6	128070000	303980000
Q27522;P50306;P50305;O17680	CAEEL Probable S-adenosylmethionine synthase 5	sams-5	sp|Q27522|METK5_CAEEL Probable S-adenosylmethionine synthase 5 OS=Caenorhabditis elegans OX=6239 GN=sams-5 PE=3 SV=2;sp|P50306|METK4_CAEEL Probable S-adenosylmethionine synthase 4 OS=Caenorhabditis elegans OX=6239 GN=sams-4 PE=1 SV=1;sp|P50305|METK3_CAEEL	4	2	2	4	43.949	404	4	4	265550000	438370000
P53596	CAEEL Succinate--CoA ligase [ADP/GDP-forming] subunit alpha, mitochondrial	sucl-1	sp|P53596|SUCA_CAEEL Succinate--CoA ligase [ADP/GDP-forming] subunit alpha, mitochondrial OS=Caenorhabditis elegans OX=6239 GN=sucl-1 PE=3 SV=1	1	2	2	6.5	33.797	322	6.5	2.8	89580000	94272000
P91027	CAEEL Calponin-homology (CH) domain-containing protein	chdp-1	tr|P91027|P91027_CAEEL Calponin-homology (CH) domain-containing protein OS=Caenorhabditis elegans OX=6239 GN=chdp-1 PE=1 SV=1	1	2	2	9.2	35.916	338	9.2	3.6	9585400	20774000
P91303	CAEEL Probable V-type proton ATPase subunit G	vha-10	sp|P91303|VATG_CAEEL Probable V-type proton ATPase subunit G OS=Caenorhabditis elegans OX=6239 GN=vha-10 PE=3 SV=1	1	2	2	15.1	14.485	126	0	15.1	0	170530000
P91306	CAEEL CSD_1 domain-containing protein	cey-2	tr|P91306|P91306_CAEEL CSD_1 domain-containing protein OS=Caenorhabditis elegans OX=6239 GN=cey-2 PE=1 SV=1	1	2	2	7.1	29.404	267	3.7	3.4	9789000	0
P91453	CAEEL Uncharacterized protein	CELE_T19B4.5	tr|P91453|P91453_CAEEL Uncharacterized protein OS=Caenorhabditis elegans OX=6239 GN=CELE_T19B4.5 PE=1 SV=1	1	2	2	5	45.823	400	5	1.8	201610000	111770000
Q10661	CAEEL Dosage compensation protein dpy-30	dpy-30	sp|Q10661|DPY30_CAEEL Dosage compensation protein dpy-30 OS=Caenorhabditis elegans OX=6239 GN=dpy-30 PE=1 SV=1	1	2	2	20.3	12.837	123	20.3	20.3	46119000	66446000
Q18655	CAEEL MFS domain-containing protein	C46C2.2	tr|Q18655|Q18655_CAEEL MFS domain-containing protein OS=Caenorhabditis elegans OX=6239 GN=C46C2.2 PE=1 SV=2	1	2	2	4.2	58.166	520	2.3	1.9	14400000	0
Q20476	CAEEL BTB domain-containing protein	CELE_F46G10.1	tr|Q20476|Q20476_CAEEL BTB domain-containing protein OS=Caenorhabditis elegans OX=6239 GN=CELE_F46G10.1 PE=1 SV=3	1	2	2	11.2	20.368	178	11.2	11.2	113610000	8896900
W6EKY2;W6E8Z9;Q20655	CAEEL 14-3-3 zeta	ftt-2	tr|W6EKY2|W6EKY2_CAEEL 14-3-3 zeta OS=Caenorhabditis elegans OX=6239 GN=ftt-2 PE=1 SV=1;tr|W6E8Z9|W6E8Z9_CAEEL 14-3-3 zeta OS=Caenorhabditis elegans OX=6239 PE=3 SV=1;sp|Q20655|14332_CAEEL 14-3-3-like protein 2 OS=Caenorhabditis elegans OX=6239 GN=ftt-2 PE	3	4	2	14.5	27.732	248	14.5	6	74877000	0
Q20938	CAEEL Probable 26S proteasome regulatory subunit rpn-6.1	rpn-6.1	sp|Q20938|PS11A_CAEEL Probable 26S proteasome regulatory subunit rpn-6.1 OS=Caenorhabditis elegans OX=6239 GN=rpn-6.1 PE=2 SV=2	1	2	2	4.8	49.091	438	4.8	2.3	12909000	25691000
Q22235	CAEEL Endoplasmin homolog	enpl-1	sp|Q22235|ENPL1_CAEEL Endoplasmin homolog OS=Caenorhabditis elegans OX=6239 GN=enpl-1 PE=3 SV=1	1	3	2	4.7	87.111	760	4.7	1.2	38375000	0
Q22620;Q65ZK5	CAEEL Prolyl Amino-acyl tRNA Synthetase	pars-1	tr|Q22620|Q22620_CAEEL Prolyl Amino-acyl tRNA Synthetase OS=Caenorhabditis elegans OX=6239 GN=pars-1 PE=1 SV=1;tr|Q65ZK5|Q65ZK5_CAEEL Prolyl Amino-acyl tRNA Synthetase OS=Caenorhabditis elegans OX=6239 GN=pars-1 PE=1 SV=1	2	2	2	3.6	65.818	581	3.6	1.9	15190000	27307000
Q93545	CAEEL Uncharacterized protein	CELE_F20G2.2	tr|Q93545|Q93545_CAEEL Uncharacterized protein OS=Caenorhabditis elegans OX=6239 GN=CELE_F20G2.2 PE=1 SV=1	1	2	2	7.2	26.767	249	7.2	3.2	44646000	11969000
Q95XJ0	CAEEL Uncharacterized protein	CELE_Y69A2AR.18	tr|Q95XJ0|Q95XJ0_CAEEL Uncharacterized protein OS=Caenorhabditis elegans OX=6239 GN=CELE_Y69A2AR.18 PE=1 SV=1	1	2	2	6.4	32.382	299	6.4	3.3	66733000	87371000
Q95XR0	CAEEL Tr-type G domain-containing protein	eif-2gamma	tr|Q95XR0|Q95XR0_CAEEL Tr-type G domain-containing protein OS=Caenorhabditis elegans OX=6239 GN=eif-2gamma PE=1 SV=1	1	2	2	4.1	51.234	469	4.1	2.1	31845000	12655000
Q95Y04	CAEEL 40S ribosomal protein S28	rps-28	sp|Q95Y04|RS28_CAEEL 40S ribosomal protein S28 OS=Caenorhabditis elegans OX=6239 GN=rps-28 PE=3 SV=1	1	2	2	32.3	7.4365	65	15.4	16.9	1643000	0
Q95YF3	CAEEL ATP-dependent RNA helicase cgh-1	cgh-1	sp|Q95YF3|CGH1_CAEEL ATP-dependent RNA helicase cgh-1 OS=Caenorhabditis elegans OX=6239 GN=cgh-1 PE=1 SV=1	1	2	2	6.3	48.713	430	6.3	6.3	179050000	359290000
Q9BKU4	CAEEL Mitochondrial prohibitin complex protein 1	phb-1	sp|Q9BKU4|PHB1_CAEEL Mitochondrial prohibitin complex protein 1 OS=Caenorhabditis elegans OX=6239 GN=phb-1 PE=1 SV=1	1	2	2	8.7	29.988	275	8.7	3.3	31898000	33907000
Q9GZH4	CAEEL Dolichyl-diphosphooligosaccharide--protein glycosyltransferase subunit 1	ribo-1	sp|Q9GZH4|RPN1_CAEEL Dolichyl-diphosphooligosaccharide--protein glycosyltransferase subunit 1 OS=Caenorhabditis elegans OX=6239 GN=ribo-1 PE=3 SV=2	1	2	2	3.6	65.736	586	3.6	1.7	66983000	24815000
Q9U2H9	CAEEL Probable elongation factor 1-beta/1-delta 2	eef-1B.2	sp|Q9U2H9|EF1B2_CAEEL Probable elongation factor 1-beta/1-delta 2 OS=Caenorhabditis elegans OX=6239 GN=eef-1B.2 PE=1 SV=4	1	2	2	9.9	28.172	263	9.9	3	21150000	117410000
Q9XWT3	CAEEL Uterine Lumin Expressed/locailized	ule-5	tr|Q9XWT3|Q9XWT3_CAEEL Uterine Lumin Expressed/locailized OS=Caenorhabditis elegans OX=6239 GN=ule-5 PE=1 SV=1	1	2	2	13.3	19.533	181	13.3	6.6	127230000	46200000
H9G2V3;A0A061ACJ8;A0A061AKQ5;A0A061AJ06;A0A061ADU4;H9G2V2;A0A061ACM9;A0A061ACJ2;A0A061ADT8;A0A061ACM4;A0A061AKP8;Q23658	CAEEL Calcium-dependent secretion activator	unc-31	tr|H9G2V3|H9G2V3_CAEEL Calcium-dependent secretion activator OS=Caenorhabditis elegans OX=6239 GN=unc-31 PE=1 SV=1;tr|A0A061ACJ8|A0A061ACJ8_CAEEL Calcium-dependent secretion activator OS=Caenorhabditis elegans OX=6239 GN=unc-31 PE=1 SV=1;tr|A0A061AKQ5|A0A0	12	1	1	0.8	154.84	1366	0.8	0.8	21077000	509670000
A0A1N7SYP7;A0A1N7SYR1;A0A1N7SYP6;Q95QW0	CAEEL Eukaryotic translation initiation factor 3 subunit L	eif-3.l	tr|A0A1N7SYP7|A0A1N7SYP7_CAEEL Eukaryotic translation initiation factor 3 subunit L OS=Caenorhabditis elegans OX=6239 GN=eif-3.l PE=1 SV=1;tr|A0A1N7SYR1|A0A1N7SYR1_CAEEL Eukaryotic translation initiation factor 3 subunit L OS=Caenorhabditis elegans OX=6239	4	1	1	1.8	57.235	492	1.8	1.8	58136000	95856000
A0A1X7RC97	CAEEL Uncharacterized protein	CELE_T21F4.1	tr|A0A1X7RC97|A0A1X7RC97_CAEEL Uncharacterized protein OS=Caenorhabditis elegans OX=6239 GN=CELE_T21F4.1 PE=1 SV=1	1	1	1	2.8	35.953	327	2.8	2.8	0	33340000
A0A3P6P9B9;A0A3P6NPD2;H8ESF4;A0A3P6NNV9;G5EF87;H8ESF3	CAEEL SANT domain-containing protein	swsn-1	tr|A0A3P6P9B9|A0A3P6P9B9_CAEEL SANT domain-containing protein OS=Caenorhabditis elegans OX=6239 GN=swsn-1 PE=1 SV=1;tr|A0A3P6NPD2|A0A3P6NPD2_CAEEL SANT domain-containing protein OS=Caenorhabditis elegans OX=6239 GN=swsn-1 PE=1 SV=1;tr|H8ESF4|H8ESF4_CAEEL S	6	1	1	1.9	55.553	519	1.9	1.9	0	36097000
H2L0N9;A0A486WV52;Q6AW03;A0A486WWC6	CAEEL Uncharacterized protein	CELE_Y37E3.17	tr|H2L0N9|H2L0N9_CAEEL Uncharacterized protein OS=Caenorhabditis elegans OX=6239 GN=CELE_Y37E3.17 PE=1 SV=1;tr|A0A486WV52|A0A486WV52_CAEEL Uncharacterized protein OS=Caenorhabditis elegans OX=6239 GN=CELE_Y37E3.17 PE=1 SV=1;tr|Q6AW03|Q6AW03_CAEEL Uncharact	4	1	1	0.8	91.821	830	0.8	0.8	78783000	27361000
Q9GRY9;A0A4V0ILI5	CAEEL KH domain-containing protein	nova-1	tr|Q9GRY9|Q9GRY9_CAEEL KH domain-containing protein OS=Caenorhabditis elegans OX=6239 GN=nova-1 PE=1 SV=1;tr|A0A4V0ILI5|A0A4V0ILI5_CAEEL KH domain-containing protein OS=Caenorhabditis elegans OX=6239 GN=nova-1 PE=1 SV=1	2	1	1	2.7	42.115	413	2.7	2.7	5802700	24603000
A5HU89;Q65ZK0;Q19825	CAEEL Probable arginine--tRNA ligase, cytoplasmic	rars-1	tr|A5HU89|A5HU89_CAEEL Probable arginine--tRNA ligase, cytoplasmic OS=Caenorhabditis elegans OX=6239 GN=rars-1 PE=1 SV=1;tr|Q65ZK0|Q65ZK0_CAEEL Probable arginine--tRNA ligase, cytoplasmic OS=Caenorhabditis elegans OX=6239 GN=rars-1 PE=1 SV=1;sp|Q19825|SYRC	3	1	1	15.7	11.642	108	15.7	15.7	15448000	0
G1K0V8;Q20751;P34563	CAEEL Eukaryotic translation initiation factor 5A	iff-1	tr|G1K0V8|G1K0V8_CAEEL Eukaryotic translation initiation factor 5A OS=Caenorhabditis elegans OX=6239 GN=iff-1 PE=1 SV=1;sp|Q20751|IF5A2_CAEEL Eukaryotic translation initiation factor 5A-2 OS=Caenorhabditis elegans OX=6239 GN=iff-2 PE=2 SV=1;sp|P34563|IF5A1	3	1	1	5	17.867	161	5	5	213580000	688830000
G3MU81;O45624;G3MU79;N1NVB4;G3MU82;G3MU80;O45623;N1NTD2;N1NTI7;G3MU83;N1NTJ2;N1NSE3;N1NV07;N1NSD8;N1NTD8;Q7JKC3	CAEEL Ubiquitin carboxyl-terminal hydrolase	math-33	tr|G3MU81|G3MU81_CAEEL Ubiquitin carboxyl-terminal hydrolase OS=Caenorhabditis elegans OX=6239 GN=math-33 PE=1 SV=1;tr|O45624|O45624_CAEEL Ubiquitin carboxyl-terminal hydrolase OS=Caenorhabditis elegans OX=6239 GN=math-33 PE=1 SV=1;tr|G3MU79|G3MU79_CAEEL U	16	1	1	1	130.95	1129	1	1	19794000	108500000
O45246;G5ECU5	CAEEL Heat Shock Protein	hsp-70	tr|O45246|O45246_CAEEL Heat Shock Protein OS=Caenorhabditis elegans OX=6239 GN=hsp-70 PE=1 SV=1;tr|G5ECU5|G5ECU5_CAEEL Uncharacterized protein OS=Caenorhabditis elegans OX=6239 GN=CELE_F44E5.4 PE=1 SV=1	2	2	1	4.5	70.438	643	2.5	2	13184000	0
G5EDF7	CAEEL Dual specificity mitogen-activated protein kinase kinase sek-1	sek-1	sp|G5EDF7|SEK1_CAEEL Dual specificity mitogen-activated protein kinase kinase sek-1 OS=Caenorhabditis elegans OX=6239 GN=sek-1 PE=1 SV=1	1	1	1	2.7	38.7	336	2.7	2.7	0	79845000
G5EDY2	CAEEL Tryptophanyl(W) Amino-acyl tRNA Synthetase	wars-1	tr|G5EDY2|G5EDY2_CAEEL Tryptophanyl(W) Amino-acyl tRNA Synthetase OS=Caenorhabditis elegans OX=6239 GN=wars-1 PE=1 SV=1	1	1	1	1.9	47.238	417	1.9	1.9	111960000	56684000
G5EET8	CAEEL PUD1_2 domain-containing protein	pud-1.2	tr|G5EET8|G5EET8_CAEEL PUD1_2 domain-containing protein OS=Caenorhabditis elegans OX=6239 GN=pud-1.2 PE=1 SV=1	1	1	1	7.3	17.184	151	7.3	7.3	10882000	14117000
I7F493;G5EFC1	CAEEL Rab-8 (Fragment)	rab-8	tr|I7F493|I7F493_CAEEL Rab-8 (Fragment) OS=Caenorhabditis elegans OX=6239 GN=rab-8 PE=2 SV=1;tr|G5EFC1|G5EFC1_CAEEL RAB family OS=Caenorhabditis elegans OX=6239 GN=rab-8 PE=1 SV=1	2	1	1	4.8	23.891	210	4.8	4.8	18756000	33638000
G5EGK8	CAEEL Serine/threonine-protein phosphatase 2A catalytic subunit	let-92	sp|G5EGK8|PP2A_CAEEL Serine/threonine-protein phosphatase 2A catalytic subunit OS=Caenorhabditis elegans OX=6239 GN=let-92 PE=1 SV=1	1	1	1	3.8	36.302	318	3.8	3.8	10473000	8766400
G5EGT7	CAEEL Eukaryotic translation initiation factor eIF5B	iffb-1	tr|G5EGT7|G5EGT7_CAEEL Eukaryotic translation initiation factor eIF5B OS=Caenorhabditis elegans OX=6239 GN=iffb-1 PE=1 SV=1	1	1	1	1	120.42	1074	0	1	0	0
G8JY43;P46550	CAEEL T-complex protein 1 subunit zeta	cct-6	tr|G8JY43|G8JY43_CAEEL T-complex protein 1 subunit zeta OS=Caenorhabditis elegans OX=6239 GN=cct-6 PE=1 SV=1;sp|P46550|TCPZ_CAEEL T-complex protein 1 subunit zeta OS=Caenorhabditis elegans OX=6239 GN=cct-6 PE=1 SV=1	2	1	1	2.1	47.67	429	2.1	2.1	43295000	65897000
Q9GZI3;H2L0M0	CAEEL Uncharacterized protein	pod-2	tr|Q9GZI3|Q9GZI3_CAEEL Uncharacterized protein OS=Caenorhabditis elegans OX=6239 GN=pod-2 PE=1 SV=1;tr|H2L0M0|H2L0M0_CAEEL Uncharacterized protein OS=Caenorhabditis elegans OX=6239 GN=pod-2 PE=1 SV=1	2	1	1	0.5	230.57	2054	0.5	0.5	24393000	6627000
Q17409;O18688;H2L2E8;P34690	CAEEL Tubulin alpha chain	tba-1	tr|Q17409|Q17409_CAEEL Tubulin alpha chain OS=Caenorhabditis elegans OX=6239 GN=tba-1 PE=3 SV=1;tr|O18688|O18688_CAEEL Tubulin alpha chain OS=Caenorhabditis elegans OX=6239 GN=tba-1 PE=1 SV=1;tr|H2L2E8|H2L2E8_CAEEL Tubulin alpha chain OS=Caenorhabditis ele	4	3	1	6	50.025	449	6	2	414840000	389550000
Q27485;J7S164;J7SA65;P09588	CAEEL Histone H2A	his-35	tr|Q27485|Q27485_CAEEL Histone H2A OS=Caenorhabditis elegans OX=6239 GN=his-35 PE=3 SV=1;tr|J7S164|J7S164_CAEEL Histone H2A OS=Caenorhabditis elegans OX=6239 GN=his-57 PE=3 SV=1;tr|J7SA65|J7SA65_CAEEL Histone H2A OS=Caenorhabditis elegans OX=6239 GN=his-57	4	1	1	5.5	13.418	127	0	5.5	0	268570000
O17921;Q18817;P12456	CAEEL Tubulin beta chain	tbb-1	tr|O17921|O17921_CAEEL Tubulin beta chain OS=Caenorhabditis elegans OX=6239 GN=tbb-1 PE=1 SV=1;tr|Q18817|Q18817_CAEEL Tubulin beta chain OS=Caenorhabditis elegans OX=6239 GN=ben-1 PE=1 SV=3;sp|P12456|TBB1_CAEEL Tubulin beta-1 chain OS=Caenorhabditis elegan	3	3	1	6.7	50.238	449	6.7	2	5253800	0
O44782	CAEEL Major sperm protein	vpr-1	tr|O44782|O44782_CAEEL Major sperm protein OS=Caenorhabditis elegans OX=6239 GN=vpr-1 PE=1 SV=1	1	1	1	3.7	26.851	245	3.7	3.7	5625800	13393000
O45769	CAEEL F-box domain-containing protein	CELE_T10C6.7	tr|O45769|O45769_CAEEL F-box domain-containing protein OS=Caenorhabditis elegans OX=6239 GN=CELE_T10C6.7 PE=4 SV=2	1	1	1	3.8	37.523	317	0	3.8	0	0
O45815	CAEEL ACTin	act-5	tr|O45815|O45815_CAEEL ACTin OS=Caenorhabditis elegans OX=6239 GN=act-5 PE=1 SV=1	1	3	1	8.3	41.872	375	8.3	5.6	6381900	0
O45904;P36573	CAEEL Galectin	lec-1	tr|O45904|O45904_CAEEL Galectin OS=Caenorhabditis elegans OX=6239 GN=lec-1 PE=1 SV=1;sp|P36573|LEC1_CAEEL 32 kDa beta-galactoside-binding lectin OS=Caenorhabditis elegans OX=6239 GN=lec-1 PE=1 SV=1	2	1	1	3.2	32.683	285	3.2	3.2	56958000	62562000
O45971;O45972	CAEEL Uncharacterized protein	CELE_Y6E2A.1	tr|O45971|O45971_CAEEL Uncharacterized protein OS=Caenorhabditis elegans OX=6239 GN=CELE_Y6E2A.1 PE=4 SV=1;tr|O45972|O45972_CAEEL Seven TM Receptor OS=Caenorhabditis elegans OX=6239 GN=str-101 PE=4 SV=3	2	1	1	3.3	35.652	307	3.3	3.3	4986200000	25576000
O61792	CAEEL MPN domain-containing protein	rpn-8	tr|O61792|O61792_CAEEL MPN domain-containing protein OS=Caenorhabditis elegans OX=6239 GN=rpn-8 PE=1 SV=1	1	1	1	2.5	40.687	362	0	2.5	0	0
O76715	CAEEL Uncharacterized protein	CELE_F36H12.5	tr|O76715|O76715_CAEEL Uncharacterized protein OS=Caenorhabditis elegans OX=6239 GN=CELE_F36H12.5 PE=1 SV=1	1	1	1	12.7	22.335	197	12.7	12.7	21964000	3527500
P06125	CAEEL Vitellogenin-5	vit-5	sp|P06125|VIT5_CAEEL Vitellogenin-5 OS=Caenorhabditis elegans OX=6239 GN=vit-5 PE=2 SV=2	1	13	1	7.2	186.44	1603	7.2	2.1	1068400000	1146400000
P19826	CAEEL Vinculin	deb-1	sp|P19826|VINC_CAEEL Vinculin OS=Caenorhabditis elegans OX=6239 GN=deb-1 PE=1 SV=2	1	1	1	0.7	120.78	1090	0.7	0.7	0	90303000
P27798	CAEEL Calreticulin	crt-1	sp|P27798|CALR_CAEEL Calreticulin OS=Caenorhabditis elegans OX=6239 GN=crt-1 PE=1 SV=1	1	1	1	2.8	45.616	395	2.8	2.8	0	28934000
P34500	CAEEL Transthyretin-like protein 2	ttr-2	sp|P34500|TTR2_CAEEL Transthyretin-like protein 2 OS=Caenorhabditis elegans OX=6239 GN=ttr-2 PE=1 SV=1	1	1	1	6.8	15.703	148	6.8	6.8	16861000	29486000
P41847	CAEEL Anamorsin homolog	T20B12.7	sp|P41847|DRE2_CAEEL Anamorsin homolog OS=Caenorhabditis elegans OX=6239 GN=T20B12.7 PE=3 SV=1	1	1	1	3.8	25.551	238	3.8	3.8	0	8670400
P41937;P52275	CAEEL Tubulin beta-4 chain	tbb-4	sp|P41937|TBB4_CAEEL Tubulin beta-4 chain OS=Caenorhabditis elegans OX=6239 GN=tbb-4 PE=3 SV=1;sp|P52275|TBB2_CAEEL Tubulin beta-2 chain OS=Caenorhabditis elegans OX=6239 GN=tbb-2 PE=1 SV=1	2	3	1	6.8	49.8	444	6.8	2	49682000	60336000
P46582	CAEEL Protein sumv-1	sumv-1	sp|P46582|SUMV1_CAEEL Protein sumv-1 OS=Caenorhabditis elegans OX=6239 GN=sumv-1 PE=2 SV=2	1	1	1	1.1	112.21	1024	0	1.1	0	0
P48158	CAEEL 60S ribosomal protein L23	rpl-23	sp|P48158|RL23_CAEEL 60S ribosomal protein L23 OS=Caenorhabditis elegans OX=6239 GN=rpl-23 PE=3 SV=1	1	1	1	7.1	14.954	140	7.1	7.1	0	9755500
P52015	CAEEL Peptidyl-prolyl cis-trans isomerase 7	cyn-7	sp|P52015|CYP7_CAEEL Peptidyl-prolyl cis-trans isomerase 7 OS=Caenorhabditis elegans OX=6239 GN=cyn-7 PE=1 SV=2	1	1	1	7	18.401	171	7	7	17111000	70854000
Q86D21;P52709	CAEEL AA_TRNA_LIGASE_II domain-containing protein	tars-1	tr|Q86D21|Q86D21_CAEEL AA_TRNA_LIGASE_II domain-containing protein OS=Caenorhabditis elegans OX=6239 GN=tars-1 PE=1 SV=1;sp|P52709|SYTC_CAEEL Threonine--tRNA ligase, cytoplasmic OS=Caenorhabditis elegans OX=6239 GN=tars-1 PE=3 SV=1	2	1	1	1.2	79.463	684	1.2	1.2	36572000	44473000
P90889	CAEEL Uncharacterized protein	CELE_F55H12.4	tr|P90889|P90889_CAEEL Uncharacterized protein OS=Caenorhabditis elegans OX=6239 GN=CELE_F55H12.4 PE=1 SV=1	1	1	1	3.8	22.043	208	0	3.8	0	86366000
Q07749	CAEEL Actin-depolymerizing factor 2, isoform c	unc-60	sp|Q07749|ADF2_CAEEL Actin-depolymerizing factor 2, isoform c OS=Caenorhabditis elegans OX=6239 GN=unc-60 PE=1 SV=1	1	1	1	7.2	17.046	152	7.2	7.2	52109000	50785000
Q09596	CAEEL Probable glutathione S-transferase 5	gst-5	sp|Q09596|GST5_CAEEL Probable glutathione S-transferase 5 OS=Caenorhabditis elegans OX=6239 GN=gst-5 PE=1 SV=1	1	1	1	3.4	23.252	207	3.4	3.4	27068000	26180000
Q8I711;Q10039	CAEEL Glycine--tRNA ligase	gars-1	tr|Q8I711|Q8I711_CAEEL Glycine--tRNA ligase OS=Caenorhabditis elegans OX=6239 GN=gars-1 PE=1 SV=1;sp|Q10039|GARS_CAEEL Glycine--tRNA ligase OS=Caenorhabditis elegans OX=6239 GN=gars-1 PE=1 SV=2	2	1	1	1.5	76.483	678	1.5	1.5	6028500	16383000
Q10454	CAEEL Probable arginine kinase F46H5.3	F46H5.3	sp|Q10454|KARG1_CAEEL Probable arginine kinase F46H5.3 OS=Caenorhabditis elegans OX=6239 GN=F46H5.3 PE=3 SV=2	1	1	1	2.5	44.167	396	2.5	2.5	0	57683000
Q11067	CAEEL Protein disulfide-isomerase A6 homolog	pdi-6	sp|Q11067|PDIA6_CAEEL Protein disulfide-isomerase A6 homolog OS=Caenorhabditis elegans OX=6239 GN=pdi-6 PE=3 SV=1	1	1	1	3.4	47.727	440	0	3.4	0	19651000
Q11117	CAEEL LAMP family protein lmp-1	lmp-1	sp|Q11117|LMP1_CAEEL LAMP family protein lmp-1 OS=Caenorhabditis elegans OX=6239 GN=lmp-1 PE=2 SV=1	1	1	1	7.2	25.792	237	7.2	7.2	20287000	6795500
Q7K798;Q7K797;Q9U302;Q17350	CAEEL Polyadenylate-binding protein	pab-1	tr|Q7K798|Q7K798_CAEEL Polyadenylate-binding protein OS=Caenorhabditis elegans OX=6239 GN=pab-1 PE=1 SV=1;tr|Q7K797|Q7K797_CAEEL Polyadenylate-binding protein OS=Caenorhabditis elegans OX=6239 GN=pab-1 PE=1 SV=1;tr|Q9U302|Q9U302_CAEEL Polyadenylate-binding	4	1	1	1.4	64.767	583	1.4	1.4	4215200	20508000
Q18061	CAEEL Uncharacterized protein	C17C3.3	tr|Q18061|Q18061_CAEEL Uncharacterized protein OS=Caenorhabditis elegans OX=6239 GN=C17C3.3 PE=4 SV=2	1	1	1	3.5	35.904	316	0	3.5	0	0
Q18624	CAEEL SAND domain-containing protein	gmeb-3	tr|Q18624|Q18624_CAEEL SAND domain-containing protein OS=Caenorhabditis elegans OX=6239 GN=gmeb-3 PE=1 SV=2	1	1	1	6.6	42.769	376	0	6.6	0	34430000
Q19818	CAEEL NHL (Ring finger b-box coiled coil) domain containing	nhl-2	tr|Q19818|Q19818_CAEEL NHL (Ring finger b-box coiled coil) domain containing OS=Caenorhabditis elegans OX=6239 GN=nhl-2 PE=1 SV=2	1	1	1	1.2	112.16	1032	1.2	1.2	0	102000000
Q20140	CAEEL Adenylate kinase isoenzyme 1	F38B2.4	sp|Q20140|KAD1_CAEEL Adenylate kinase isoenzyme 1 OS=Caenorhabditis elegans OX=6239 GN=F38B2.4 PE=2 SV=1	1	1	1	4.3	22.597	210	0	4.3	0	46574000
Q21166	CAEEL Acetoacetyl-CoA synthetase	sur-5	sp|Q21166|SUR5_CAEEL Acetoacetyl-CoA synthetase OS=Caenorhabditis elegans OX=6239 GN=sur-5 PE=2 SV=1	1	1	1	1.6	78.338	700	1.6	1.6	12456000	0
Q21436	CAEEL Nuclear Pore complex Protein	npp-3	tr|Q21436|Q21436_CAEEL Nuclear Pore complex Protein OS=Caenorhabditis elegans OX=6239 GN=npp-3 PE=1 SV=1	1	1	1	0.9	191.32	1696	0.9	0.9	0	1645600
Q21732	CAEEL Uncharacterized protein	CELE_R04F11.2	tr|Q21732|Q21732_CAEEL Uncharacterized protein OS=Caenorhabditis elegans OX=6239 GN=CELE_R04F11.2 PE=1 SV=1	1	1	1	9.3	12.303	107	9.3	9.3	130530000	63412000
Q21740	CAEEL DFDF domain-containing protein	edc-3	tr|Q21740|Q21740_CAEEL DFDF domain-containing protein OS=Caenorhabditis elegans OX=6239 GN=edc-3 PE=1 SV=1	1	1	1	1.8	62.637	566	1.8	1.8	0	27378000
Q86LS6;Q21962	CAEEL Glycine cleavage system P protein	gldc-1	tr|Q86LS6|Q86LS6_CAEEL Glycine cleavage system P protein OS=Caenorhabditis elegans OX=6239 GN=gldc-1 PE=1 SV=2;tr|Q21962|Q21962_CAEEL Glycine cleavage system P protein OS=Caenorhabditis elegans OX=6239 GN=gldc-1 PE=1 SV=1	2	1	1	1.1	101.49	915	1.1	1.1	9653200	2215500
Q22038	CAEEL Ras-like GTP-binding protein rhoA	rho-1	sp|Q22038|RHO1_CAEEL Ras-like GTP-binding protein rhoA OS=Caenorhabditis elegans OX=6239 GN=rho-1 PE=1 SV=1	1	1	1	4.7	21.635	192	4.7	4.7	91581000	82345000
Q23092	CAEEL Fatty acid-binding protein homolog 4	lbp-4	sp|Q23092|FABP4_CAEEL Fatty acid-binding protein homolog 4 OS=Caenorhabditis elegans OX=6239 GN=lbp-4 PE=3 SV=1	1	1	1	6.9	17.184	145	6.9	6.9	35372000	45955000
Q23315	CAEEL Glutamyl(E) Amino-acyl tRNA Synthetase	ears-1	tr|Q23315|Q23315_CAEEL Glutamyl(E) Amino-acyl tRNA Synthetase OS=Caenorhabditis elegans OX=6239 GN=ears-1 PE=1 SV=1	1	1	1	1.1	125.2	1149	1.1	1.1	50187000	73344000
Q23571	CAEEL Lipoamide acyltransferase component of branched-chain alpha-keto acid dehydrogenase complex, mitochondrial	dbt-1	sp|Q23571|ODB2_CAEEL Lipoamide acyltransferase component of branched-chain alpha-keto acid dehydrogenase complex, mitochondrial OS=Caenorhabditis elegans OX=6239 GN=dbt-1 PE=2 SV=1	1	1	1	2.5	49.691	448	2.5	2.5	30273000	60260000
Q27464	CAEEL Glucose-6-phosphate 1-dehydrogenase	gspd-1	sp|Q27464|G6PD_CAEEL Glucose-6-phosphate 1-dehydrogenase OS=Caenorhabditis elegans OX=6239 GN=gspd-1 PE=3 SV=1	1	1	1	1.7	60.215	522	1.7	1.7	64143000	175370000
Q27GU2	CAEEL FABP domain-containing protein	lbp-3	tr|Q27GU2|Q27GU2_CAEEL FABP domain-containing protein OS=Caenorhabditis elegans OX=6239 GN=lbp-3 PE=1 SV=1	1	1	1	6.7	17.32	150	6.7	6.7	6733800	17475000
Q6EUU1;Q9XXU4	CAEEL G_PROTEIN_RECEP_F1_2 domain-containing protein	npr-10	tr|Q6EUU1|Q6EUU1_CAEEL G_PROTEIN_RECEP_F1_2 domain-containing protein OS=Caenorhabditis elegans OX=6239 GN=npr-10 PE=3 SV=1;tr|Q9XXU4|Q9XXU4_CAEEL G_PROTEIN_RECEP_F1_2 domain-containing protein OS=Caenorhabditis elegans OX=6239 GN=npr-10 PE=3 SV=1	2	1	1	3	40.576	362	0	3	0	0
Q8MNU8	CAEEL Protein FMC1 homolog	C29E4.12	sp|Q8MNU8|FMC1_CAEEL Protein FMC1 homolog OS=Caenorhabditis elegans OX=6239 GN=C29E4.12 PE=3 SV=1	1	1	1	9.3	12.138	108	9.3	9.3	13496000	32873000
Q93615	CAEEL Probable electron transfer flavoprotein subunit alpha, mitochondrial	F27D4.1	sp|Q93615|ETFA_CAEEL Probable electron transfer flavoprotein subunit alpha, mitochondrial OS=Caenorhabditis elegans OX=6239 GN=F27D4.1 PE=3 SV=2	1	1	1	2.4	34.454	332	2.4	2.4	26282000	5556000
Q95Y90	CAEEL 60S ribosomal protein L9	rpl-9	sp|Q95Y90|RL9_CAEEL 60S ribosomal protein L9 OS=Caenorhabditis elegans OX=6239 GN=rpl-9 PE=3 SV=1	1	1	1	4.2	21.508	189	4.2	4.2	144910000	135700000
Q9BKX2	CAEEL F-box domain-containing protein	CELE_Y22D7AR.2	tr|Q9BKX2|Q9BKX2_CAEEL F-box domain-containing protein OS=Caenorhabditis elegans OX=6239 GN=CELE_Y22D7AR.2 PE=1 SV=3	1	1	1	1.6	127.55	1133	1.6	1.6	4011000	21549000
Q9GZH5	CAEEL 26S proteasome non-ATPase regulatory subunit 2	rpn-1	tr|Q9GZH5|Q9GZH5_CAEEL 26S proteasome non-ATPase regulatory subunit 2 OS=Caenorhabditis elegans OX=6239 GN=rpn-1 PE=1 SV=1	1	1	1	0.9	107.38	981	0.9	0.9	97784000	49297000
Q9N4G8	CAEEL Receptor expression-enhancing protein	yop-1	tr|Q9N4G8|Q9N4G8_CAEEL Receptor expression-enhancing protein OS=Caenorhabditis elegans OX=6239 GN=yop-1 PE=1 SV=1	1	1	1	4.4	20.564	183	4.4	4.4	56167000	29875000
Q9N4J2	CAEEL Vitellogenin-3	vit-3	sp|Q9N4J2|VIT3_CAEEL Vitellogenin-3 OS=Caenorhabditis elegans OX=6239 GN=vit-3 PE=1 SV=1	1	12	1	6.8	186.53	1603	6.8	2.1	9046300	0
V6CM05;Q9N4T5	CAEEL OTU domain-containing protein	otub-2	tr|V6CM05|V6CM05_CAEEL OTU domain-containing protein OS=Caenorhabditis elegans OX=6239 GN=otub-2 PE=4 SV=1;tr|Q9N4T5|Q9N4T5_CAEEL OTU domain-containing protein OS=Caenorhabditis elegans OX=6239 GN=otub-2 PE=4 SV=2	2	1	1	2.4	56.275	499	0	2.4	0	0
Q9N5B3	CAEEL Peptidase_M24 domain-containing protein	CELE_W08E12.7	tr|Q9N5B3|Q9N5B3_CAEEL Peptidase_M24 domain-containing protein OS=Caenorhabditis elegans OX=6239 GN=CELE_W08E12.7 PE=1 SV=1	1	1	1	2	43.032	391	2	2	156670000	187590000
Q9U2X0	CAEEL Protein arginine N-methyltransferase 1	prmt-1	sp|Q9U2X0|ANM1_CAEEL Protein arginine N-methyltransferase 1 OS=Caenorhabditis elegans OX=6239 GN=prmt-1 PE=1 SV=1	1	1	1	3.4	39.771	348	3.4	3.4	0	4367400
Q9U315	CAEEL DUF4440 domain-containing protein	CELE_Y105C5B.5	tr|Q9U315|Q9U315_CAEEL DUF4440 domain-containing protein OS=Caenorhabditis elegans OX=6239 GN=CELE_Y105C5B.5 PE=1 SV=1	1	1	1	7.1	14.124	127	7.1	7.1	17567000	71849000
Q9U354	CAEEL Related to yeast Vacuolar Protein Sorting factor	vps-25	tr|Q9U354|Q9U354_CAEEL Related to yeast Vacuolar Protein Sorting factor OS=Caenorhabditis elegans OX=6239 GN=vps-25 PE=1 SV=1	1	1	1	6	21.473	183	6	6	6321300	3946400
Q9XTT9	CAEEL 26S proteasome regulatory subunit 8	rpt-6	sp|Q9XTT9|PRS8_CAEEL 26S proteasome regulatory subunit 8 OS=Caenorhabditis elegans OX=6239 GN=rpt-6 PE=1 SV=1	1	1	1	3.1	46.249	416	3.1	3.1	16553000	0
Q9XVK5	CAEEL NEDD8-conjugating enzyme ubc-12	ubc-12	sp|Q9XVK5|UBC12_CAEEL NEDD8-conjugating enzyme ubc-12 OS=Caenorhabditis elegans OX=6239 GN=ubc-12 PE=2 SV=1	1	1	1	5	21.101	180	5	5	12143000	14498000
Q9XW17	CAEEL Cytokinesis, Apoptosis, RNA-associated	car-1	tr|Q9XW17|Q9XW17_CAEEL Cytokinesis, Apoptosis, RNA-associated OS=Caenorhabditis elegans OX=6239 GN=car-1 PE=1 SV=1	1	1	1	5	37.61	340	5	5	20242000	12083000
Q9XWS4	CAEEL Ribosomal_L7Ae domain-containing protein	rpl-30	tr|Q9XWS4|Q9XWS4_CAEEL Ribosomal_L7Ae domain-containing protein OS=Caenorhabditis elegans OX=6239 GN=rpl-30 PE=1 SV=2	1	1	1	7	12.437	115	7	7	57590000	52532000
Q9XWS6	CAEEL Uncharacterized protein	CELE_Y62H9A.5	tr|Q9XWS6|Q9XWS6_CAEEL Uncharacterized protein OS=Caenorhabditis elegans OX=6239 GN=CELE_Y62H9A.5 PE=1 SV=2	1	1	1	4.2	18.496	165	0	4.2	0	79508000
Q9XWU9	CAEEL Uncharacterized protein	CELE_Y37D8A.19	tr|Q9XWU9|Q9XWU9_CAEEL Uncharacterized protein OS=Caenorhabditis elegans OX=6239 GN=CELE_Y37D8A.19 PE=1 SV=1	1	1	1	10.9	10.302	101	10.9	10.9	8346000	23072000
P18947	CAEEL Vitellogenin-4	vit-4	sp|P18947|VIT4_CAEEL Vitellogenin-4 OS=Caenorhabditis elegans OX=6239 GN=vit-4 PE=1 SV=3	1	12	0	6.8	186.31	1603	6.8	1.7	14249000	51995000

## Sheet: HSP
Protein IDs	Protein names	Gene names	Fasta headers	Number of proteins	Peptides	Unique peptides	Sequence coverage [%]	Mol. weight [kDa]	Sequence length	Sequence coverage R1528-HSP [%]	Sequence coverage R1528-HSP-FLAG [%]	LFQ intensity R1528-HSP	LFQ intensity R1528-HSP-FLAG
A0A486WXP6;G5EEF0;A0A486WVH0;A0A486WUR9;H2FLL0;H2FLK8;H2FLL1;G5EDH9;H2FLK6;A0A486WTP6;H2FLK9;H2FLK7;A0A486WWP8;A0A486WVD1;G5EFU3;H2FLK4;H2FLK3;H2FLK5;F5GUH5;G5EGB8;G5EBW6	CAEEL Plant Late Embryo Abundant (LEA) related	lea-1	tr|A0A486WXP6|A0A486WXP6_CAEEL Plant Late Embryo Abundant (LEA) related OS=Caenorhabditis elegans OX=6239 GN=lea-1 PE=1 SV=1;tr|G5EEF0|G5EEF0_CAEEL Plant Late Embryo Abundant (LEA) related OS=Caenorhabditis elegans OX=6239 GN=lea-1 PE=1 SV=1;tr|A0A486WVH0|	21	18	18	16.3	131.57	1250	15.5	11.8	541870000	1885700000
P05690;P55155	CAEEL Vitellogenin-2	vit-2	sp|P05690|VIT2_CAEEL Vitellogenin-2 OS=Caenorhabditis elegans OX=6239 GN=vit-2 PE=1 SV=5;sp|P55155|VIT1_CAEEL Vitellogenin-1 OS=Caenorhabditis elegans OX=6239 GN=vit-1 PE=1 SV=2	2	11	11	6.3	187.72	1613	6.3	3.2	2593200000	1429200000
P18948	CAEEL Vitellogenin-6	vit-6	sp|P18948|VIT6_CAEEL Vitellogenin-6 OS=Caenorhabditis elegans OX=6239 GN=vit-6 PE=1 SV=5	1	10	10	6.1	193.32	1651	6.1	1.3	825600000	76000000
Q18100;Q53U86;Q4PIU9;Q53U87;W6RTH3;W6RRX6	CAEEL Fibronectin type-III domain-containing protein	sax-7	tr|Q18100|Q18100_CAEEL Fibronectin type-III domain-containing protein OS=Caenorhabditis elegans OX=6239 GN=sax-7 PE=1 SV=3;tr|Q53U86|Q53U86_CAEEL Fibronectin type-III domain-containing protein OS=Caenorhabditis elegans OX=6239 GN=sax-7 PE=1 SV=1;tr|Q4PIU9|	6	9	9	8.3	127.62	1144	8.3	1.6	807770000	246200000
U4PMD6;Q8MXS0;Q95XP6;B7CED8;Q95XP5;O76832;Q9TYP9;O76833;F5GU98;G5EC39;G5EC04;G5EFR6	CAEEL Calcium-transporting ATPase	mca-3	tr|U4PMD6|U4PMD6_CAEEL Calcium-transporting ATPase OS=Caenorhabditis elegans OX=6239 GN=mca-3 PE=1 SV=1;tr|Q8MXS0|Q8MXS0_CAEEL Calcium-transporting ATPase OS=Caenorhabditis elegans OX=6239 GN=mca-3 PE=1 SV=1;tr|Q95XP6|Q95XP6_CAEEL Calcium-transporting ATPa	12	8	8	8.4	111.82	1027	8.4	0	188750000	0
Q18688	CAEEL Heat shock protein 90	daf-21	sp|Q18688|HSP90_CAEEL Heat shock protein 90 OS=Caenorhabditis elegans OX=6239 GN=daf-21 PE=1 SV=1	1	9	8	13	80.282	702	11.1	6	724300000	89317000
P02566	CAEEL Myosin-4	unc-54	sp|P02566|MYO4_CAEEL Myosin-4 OS=Caenorhabditis elegans OX=6239 GN=unc-54 PE=1 SV=2	1	7	7	4.2	224.75	1963	4.2	0.5	110590000	35591000
P29691	CAEEL Elongation factor 2	eef-2	sp|P29691|EF2_CAEEL Elongation factor 2 OS=Caenorhabditis elegans OX=6239 GN=eef-2 PE=1 SV=4	1	7	7	8.7	94.795	852	8.7	1.2	362820000	11460000
P90735;Q27461;G5EFV6	CAEEL Sodium/potassium-transporting ATPase subunit alpha	eat-6	tr|P90735|P90735_CAEEL Sodium/potassium-transporting ATPase subunit alpha OS=Caenorhabditis elegans OX=6239 GN=eat-6 PE=1 SV=1;tr|Q27461|Q27461_CAEEL Sodium/potassium-transporting ATPase subunit alpha OS=Caenorhabditis elegans OX=6239 GN=eat-6 PE=3 SV=1	3	7	7	7.4	111	996	7.4	1.9	360650000	103240000
G5ED07	CAEEL Protein disulfide-isomerase	pdi-3	tr|G5ED07|G5ED07_CAEEL Protein disulfide-isomerase OS=Caenorhabditis elegans OX=6239 GN=pdi-3 PE=1 SV=1	1	6	6	12.7	54.92	488	12.7	3.3	365400000	607360000
O76512	CAEEL Regulator of nonsense transcripts 1	smg-2	sp|O76512|RENT1_CAEEL Regulator of nonsense transcripts 1 OS=Caenorhabditis elegans OX=6239 GN=smg-2 PE=1 SV=1	1	6	6	5	120.02	1069	5	1.5	218320000	384200000
P34574	CAEEL Probable clathrin heavy chain 1	chc-1	sp|P34574|CLH_CAEEL Probable clathrin heavy chain 1 OS=Caenorhabditis elegans OX=6239 GN=chc-1 PE=1 SV=1	1	6	6	3.4	191.54	1681	3.4	0.5	168820000	35865000
Q94271	CAEEL Peptidase A1 domain-containing protein	asp-14	tr|Q94271|Q94271_CAEEL Peptidase A1 domain-containing protein OS=Caenorhabditis elegans OX=6239 GN=asp-14 PE=1 SV=2	1	6	6	16.4	39.717	366	10.9	7.7	1570000000	2644100000
P09446;P20163;P27420	CAEEL Heat shock 70 kDa protein A	hsp-1	sp|P09446|HSP7A_CAEEL Heat shock 70 kDa protein A OS=Caenorhabditis elegans OX=6239 GN=hsp-1 PE=1 SV=2	3	6	5	7.8	69.722	640	5.8	4.4	299080000	688620000
Q7JPI2;Q19866;Q18907	CAEEL Suppressor of forked homolog	suf-1	tr|Q7JPI2|Q7JPI2_CAEEL Suppressor of forked homolog OS=Caenorhabditis elegans OX=6239 GN=suf-1 PE=2 SV=1;tr|Q19866|Q19866_CAEEL Suf domain-containing protein OS=Caenorhabditis elegans OX=6239 GN=suf-1 PE=1 SV=1;tr|Q18907|Q18907_CAEEL Cleavage stimulation f	3	5	5	6.8	84.145	730	6.8	2.2	1074700000	422170000
Q8WQD8;Q21614	CAEEL Alpha-carbonic anhydrase domain-containing protein	cah-4	tr|Q8WQD8|Q8WQD8_CAEEL Alpha-carbonic anhydrase domain-containing protein OS=Caenorhabditis elegans OX=6239 GN=cah-4 PE=1 SV=1;tr|Q21614|Q21614_CAEEL Alpha-carbonic anhydrase domain-containing protein OS=Caenorhabditis elegans OX=6239 GN=cah-4 PE=1 SV=3	2	5	5	17	26.17	235	17	8.9	1588800000	992490000
Q23621	CAEEL Glutamate dehydrogenase	gdh-1	tr|Q23621|Q23621_CAEEL Glutamate dehydrogenase OS=Caenorhabditis elegans OX=6239 GN=gdh-1 PE=1 SV=1	1	5	5	10.4	58.794	536	10.4	3.4	343100000	334220000
Q966I7;Q8MXU9	CAEEL CCHC-type domain-containing protein	CELE_K08D12.3	tr|Q966I7|Q966I7_CAEEL CCHC-type domain-containing protein OS=Caenorhabditis elegans OX=6239 GN=CELE_K08D12.3 PE=1 SV=1	2	5	5	32.5	15.557	151	32.5	32.5	779570000	1116200000
G5ECU3;P40614	CAEEL Phosphate carrier protein, mitochondrial	CELE_F01G4.6	tr|G5ECU3|G5ECU3_CAEEL Phosphate carrier protein, mitochondrial OS=Caenorhabditis elegans OX=6239 GN=CELE_F01G4.6 PE=1 SV=1;sp|P40614|MPCP_CAEEL Phosphate carrier protein, mitochondrial OS=Caenorhabditis elegans OX=6239 GN=F01G4.6 PE=2 SV=1	2	4	4	10.9	42.09	387	8.5	2.3	74681000	0
O44400	CAEEL Protein F37C4.5	F37C4.5	sp|O44400|F37C4_CAEEL Protein F37C4.5 OS=Caenorhabditis elegans OX=6239 GN=F37C4.5 PE=1 SV=3	1	4	4	7	61.443	556	7	1.4	101520000	78106000
O45934	CAEEL Uncharacterized protein	CELE_Y43F4B.5	tr|O45934|O45934_CAEEL Uncharacterized protein OS=Caenorhabditis elegans OX=6239 GN=CELE_Y43F4B.5 PE=1 SV=1	1	4	4	6.1	66.586	595	4.5	1.5	99752000	0
O76447	CAEEL HoloCentric chromosome binding Protein	hcp-1	tr|O76447|O76447_CAEEL HoloCentric chromosome binding Protein OS=Caenorhabditis elegans OX=6239 GN=hcp-1 PE=1 SV=1	1	4	4	3.9	166.76	1475	3.9	0	49726000	0
Q6A8K1;P10986;P10984;P0DM42;P0DM41;Q95ZL1	CAEEL Actin-4	act-4	tr|Q6A8K1|Q6A8K1_CAEEL Actin-4 OS=Caenorhabditis elegans OX=6239 GN=act-4 PE=1 SV=1;sp|P10986|ACT4_CAEEL Actin-4 OS=Caenorhabditis elegans OX=6239 GN=act-4 PE=3 SV=2;sp|P10984|ACT2_CAEEL Actin-2 OS=Caenorhabditis elegans OX=6239 GN=act-2 PE=3 SV=3;sp|P0DM4	6	6	4	22.9	40.426	362	22.9	8.6	1856300000	268000000
P54216	CAEEL Fructose-bisphosphate aldolase 1	aldo-1	sp|P54216|ALF1_CAEEL Fructose-bisphosphate aldolase 1 OS=Caenorhabditis elegans OX=6239 GN=aldo-1 PE=1 SV=1	1	4	4	10.1	39.24	366	10.1	1.9	188230000	114780000
P54412	CAEEL Probable elongation factor 1-gamma	eef-1G	sp|P54412|EF1G_CAEEL Probable elongation factor 1-gamma OS=Caenorhabditis elegans OX=6239 GN=eef-1G PE=1 SV=1	1	4	4	12.3	44.387	398	12.3	2.5	160760000	203400000
Q19864	CAEEL WD_REPEATS_REGION domain-containing protein	cpf-1	tr|Q19864|Q19864_CAEEL WD_REPEATS_REGION domain-containing protein OS=Caenorhabditis elegans OX=6239 GN=cpf-1 PE=1 SV=1	1	4	4	8.8	47.961	430	8.8	0	332940000	0
Q22494	CAEEL Probable V-type proton ATPase subunit H 2	vha-15	sp|Q22494|VATH2_CAEEL Probable V-type proton ATPase subunit H 2 OS=Caenorhabditis elegans OX=6239 GN=vha-15 PE=3 SV=1	1	4	4	9.8	54.212	470	9.8	0	66407000	0
Q9N358;U4PBK9	CAEEL T-complex protein 1 subunit theta	cct-8	sp|Q9N358|TCPQ_CAEEL T-complex protein 1 subunit theta OS=Caenorhabditis elegans OX=6239 GN=cct-8 PE=1 SV=3;tr|U4PBK9|U4PBK9_CAEEL T-complex protein 1 subunit theta OS=Caenorhabditis elegans OX=6239 GN=cct-8 PE=1 SV=1	2	4	4	6.9	59.733	548	6.9	3.1	182320000	140000000
Q9XW92	CAEEL V-type proton ATPase catalytic subunit A	vha-13	sp|Q9XW92|VATA_CAEEL V-type proton ATPase catalytic subunit A OS=Caenorhabditis elegans OX=6239 GN=vha-13 PE=1 SV=3	1	4	4	9.4	66.459	606	5.9	3.5	106960000	0
A0A061ACR1;Q2XN02;F5GUA3;Q22498	CAEEL Coatomer subunit gamma	copg-1	tr|A0A061ACR1|A0A061ACR1_CAEEL Coatomer subunit gamma OS=Caenorhabditis elegans OX=6239 GN=copg-1 PE=1 SV=1;tr|Q2XN02|Q2XN02_CAEEL Coatomer subunit gamma OS=Caenorhabditis elegans OX=6239 GN=copg-1 PE=1 SV=1;tr|F5GUA3|F5GUA3_CAEEL Coatomer subunit gamma OS	4	3	3	3.8	96.57	872	3.8	1	36325000	0
A0A486WVA9;A0A486WWW2;A0A486WV77;A0A486WWC7;Q9N533	CAEEL WD_REPEATS_REGION domain-containing protein	CELE_Y32H12A.8	tr|A0A486WVA9|A0A486WVA9_CAEEL WD_REPEATS_REGION domain-containing protein OS=Caenorhabditis elegans OX=6239 GN=CELE_Y32H12A.8 PE=1 SV=1;tr|A0A486WWW2|A0A486WWW2_CAEEL WD_REPEATS_REGION domain-containing protein OS=Caenorhabditis elegans OX=6239 GN=CELE_Y3	5	3	3	0.9	415.6	3547	0.9	0	45566000	0
A5Z2S3;O62263	CAEEL Uncharacterized protein	CELE_F54B3.1	tr|A5Z2S3|A5Z2S3_CAEEL Uncharacterized protein OS=Caenorhabditis elegans OX=6239 GN=CELE_F54B3.1 PE=1 SV=2;tr|O62263|O62263_CAEEL Uncharacterized protein OS=Caenorhabditis elegans OX=6239 GN=CELE_F54B3.1 PE=1 SV=2	2	3	3	0.9	410.99	3563	0.9	0	41939000	0
B3GWB2;Q17832	CAEEL ViGiLN homolog	vgln-1	tr|B3GWB2|B3GWB2_CAEEL ViGiLN homolog OS=Caenorhabditis elegans OX=6239 GN=vgln-1 PE=1 SV=1;tr|Q17832|Q17832_CAEEL ViGiLN homolog OS=Caenorhabditis elegans OX=6239 GN=vgln-1 PE=1 SV=2	2	3	3	3.8	101.83	925	3.8	0	25489000	0
G5EFS5;Q9N5T2	CAEEL Uncharacterized protein	CELE_F45D11.15	tr|G5EFS5|G5EFS5_CAEEL Uncharacterized protein OS=Caenorhabditis elegans OX=6239 GN=CELE_F45D11.15 PE=4 SV=1;tr|Q9N5T2|Q9N5T2_CAEEL Uncharacterized protein OS=Caenorhabditis elegans OX=6239 GN=CELE_F45D11.14 PE=1 SV=1	2	3	3	5.8	58.554	501	5.8	0	28310000	0
Q6EZG4;H2KZJ5	CAEEL GLutaRedoXin	glrx-3	tr|Q6EZG4|Q6EZG4_CAEEL GLutaRedoXin OS=Caenorhabditis elegans OX=6239 GN=glrx-3 PE=1 SV=1;tr|H2KZJ5|H2KZJ5_CAEEL GLutaRedoXin OS=Caenorhabditis elegans OX=6239 GN=glrx-3 PE=1 SV=1	2	3	3	13.7	37.939	342	13.7	0	32483000	0
V6CIR8;Q9UB95;Q9UB94;Q9U4E4;O44191	CAEEL Receptor Mediated Endocytosis	rme-2	tr|V6CIR8|V6CIR8_CAEEL Receptor Mediated Endocytosis OS=Caenorhabditis elegans OX=6239 GN=rme-2 PE=1 SV=1;tr|Q9UB95|Q9UB95_CAEEL Lipoprotein receptor OS=Caenorhabditis elegans OX=6239 PE=2 SV=1;tr|Q9UB94|Q9UB94_CAEEL Lr protein OS=Caenorhabditis elegans OX	5	3	3	3.5	94.126	846	3.5	0	49259000	0
O45148	CAEEL Lipoyl-binding domain-containing protein	dlst-1	tr|O45148|O45148_CAEEL Lipoyl-binding domain-containing protein OS=Caenorhabditis elegans OX=6239 GN=dlst-1 PE=1 SV=2	1	3	3	7.1	49.813	463	7.1	3.2	904970000	24524000
P10299	CAEEL Glutathione S-transferase P	gst-1	sp|P10299|GSTP1_CAEEL Glutathione S-transferase P OS=Caenorhabditis elegans OX=6239 GN=gst-1 PE=1 SV=1	1	3	3	9.6	23.901	208	9.6	0	359860000	0
P41932;N1NV25	CAEEL 14-3-3-like protein 1	par-5	sp|P41932|14331_CAEEL 14-3-3-like protein 1 OS=Caenorhabditis elegans OX=6239 GN=par-5 PE=1 SV=2	2	5	3	19.4	28.19	248	19.4	10.1	543320000	155900000
P48152	CAEEL 40S ribosomal protein S3	rps-3	sp|P48152|RS3_CAEEL 40S ribosomal protein S3 OS=Caenorhabditis elegans OX=6239 GN=rps-3 PE=3 SV=1	1	3	3	9.7	27.313	247	9.7	3.2	55513000	240850000
P50140;G8JYF5;Q9U3B0;V6CLG8	CAEEL Chaperonin homolog Hsp-60, mitochondrial	hsp-60	sp|P50140|CH60_CAEEL Chaperonin homolog Hsp-60, mitochondrial OS=Caenorhabditis elegans OX=6239 GN=hsp-60 PE=2 SV=2;tr|G8JYF5|G8JYF5_CAEEL Chaperonin homolog Hsp-60, mitochondrial OS=Caenorhabditis elegans OX=6239 GN=hsp-60 PE=1 SV=1	4	3	3	6.9	60.1	568	6.9	2.1	16353000	5754500
P53013	CAEEL Elongation factor 1-alpha	eft-3	sp|P53013|EF1A_CAEEL Elongation factor 1-alpha OS=Caenorhabditis elegans OX=6239 GN=eft-3 PE=3 SV=1	1	3	3	6.7	50.668	463	4.3	5	226810000	67774000
P55326	CAEEL Uncharacterized protein F13E6.1	F13E6.1	sp|P55326|YZG1_CAEEL Uncharacterized protein F13E6.1 OS=Caenorhabditis elegans OX=6239 GN=F13E6.1 PE=3 SV=2	1	3	3	15.9	21.287	195	15.9	0	105590000	0
Q03604	CAEEL Ribonucleoside-diphosphate reductase large subunit	rnr-1	sp|Q03604|RIR1_CAEEL Ribonucleoside-diphosphate reductase large subunit OS=Caenorhabditis elegans OX=6239 GN=rnr-1 PE=3 SV=1	1	3	3	3.2	88.969	788	3.2	3.2	108910000	107220000
Q09544	CAEEL ATP synthase subunit delta, mitochondrial	F58F12.1	sp|Q09544|ATPD_CAEEL ATP synthase subunit delta, mitochondrial OS=Caenorhabditis elegans OX=6239 GN=F58F12.1 PE=1 SV=1	1	3	3	16.6	16.927	163	16.6	11	159710000	462710000
Q17770	CAEEL Protein disulfide-isomerase 2	pdi-2	sp|Q17770|PDI2_CAEEL Protein disulfide-isomerase 2 OS=Caenorhabditis elegans OX=6239 GN=pdi-2 PE=1 SV=1	1	3	3	5.7	55.152	493	5.7	1.6	310010000	14378000
Q18964	CAEEL WD repeat and FYVE domain-containing protein 2	wdfy-2	sp|Q18964|WDFY2_CAEEL WD repeat and FYVE domain-containing protein 2 OS=Caenorhabditis elegans OX=6239 GN=wdfy-2 PE=1 SV=1	1	3	3	8.2	46.239	415	8.2	0	58366000	0
Q19057	CAEEL Acyl CoA DeHydrogenase	acdh-12	tr|Q19057|Q19057_CAEEL Acyl CoA DeHydrogenase OS=Caenorhabditis elegans OX=6239 GN=acdh-12 PE=1 SV=1	1	3	3	4.6	66.171	613	4.6	0	31999000	0
Q20363	CAEEL Stress-induced protein 1	sip-1	sp|Q20363|SIP1_CAEEL Stress-induced protein 1 OS=Caenorhabditis elegans OX=6239 GN=sip-1 PE=1 SV=1	1	3	3	17	17.839	159	17	5	302970000	939370000
Q20780;Q8IG19	CAEEL Aldedh domain-containing protein	alh-1	tr|Q20780|Q20780_CAEEL Aldedh domain-containing protein OS=Caenorhabditis elegans OX=6239 GN=alh-1 PE=1 SV=3	2	3	3	6.1	55.058	510	6.1	2	266970000	300330000
Q21770;D9N120	CAEEL Argonaute protein wago-1	wago-1	sp|Q21770|WAGO1_CAEEL Argonaute protein wago-1 OS=Caenorhabditis elegans OX=6239 GN=wago-1 PE=1 SV=1	2	3	3	3.3	105.44	945	3.3	0.7	45104000	795250000
Q22054	CAEEL 40S ribosomal protein S16	rps-16	sp|Q22054|RS16_CAEEL 40S ribosomal protein S16 OS=Caenorhabditis elegans OX=6239 GN=rps-16 PE=1 SV=3	1	3	3	19.4	16.316	144	19.4	0	98589000	0
Q22993	CAEEL Phosphoethanolamine MethylTransferase	pmt-2	tr|Q22993|Q22993_CAEEL Phosphoethanolamine MethylTransferase OS=Caenorhabditis elegans OX=6239 GN=pmt-2 PE=1 SV=1	1	3	3	6.4	49.768	437	6.4	1.8	72471000	246680000
Q4TT88	CAEEL Puromycin-sensitive aminopeptidase	pam-1	sp|Q4TT88|PSA_CAEEL Puromycin-sensitive aminopeptidase OS=Caenorhabditis elegans OX=6239 GN=pam-1 PE=1 SV=1	1	3	3	3	107.15	948	3	0	23675000	0
Q8T8N8;Q9BIC3;Q9GYT0	CAEEL Enoyl-CoA Hydratase	ech-1.2	tr|Q8T8N8|Q8T8N8_CAEEL Enoyl-CoA Hydratase OS=Caenorhabditis elegans OX=6239 GN=ech-1.2 PE=1 SV=1;tr|Q9BIC3|Q9BIC3_CAEEL Enoyl-CoA Hydratase OS=Caenorhabditis elegans OX=6239 GN=ech-1.2 PE=1 SV=1;tr|Q9GYT0|Q9GYT0_CAEEL Enoyl-CoA Hydratase OS=Caenorhabditis	3	3	3	3.9	75.618	697	3.9	1.3	59061000	28707000
Q93235	CAEEL Sodium/potassium-transporting ATPase subunit beta-1	nkb-1	sp|Q93235|AT1B1_CAEEL Sodium/potassium-transporting ATPase subunit beta-1 OS=Caenorhabditis elegans OX=6239 GN=nkb-1 PE=1 SV=1	1	3	3	9.1	36.672	320	9.1	0	123380000	0
Q93572	CAEEL 60S acidic ribosomal protein P0	rla-0	sp|Q93572|RLA0_CAEEL 60S acidic ribosomal protein P0 OS=Caenorhabditis elegans OX=6239 GN=rla-0 PE=1 SV=3	1	3	3	13.5	33.774	312	13.5	0	177760000	0
Q95X44	CAEEL Vacuolar H ATPase	vha-8	tr|Q95X44|Q95X44_CAEEL Vacuolar H ATPase OS=Caenorhabditis elegans OX=6239 GN=vha-8 PE=1 SV=1	1	3	3	12.4	25.586	226	12.4	7.5	126810000	210590000
Q9XWD6	CAEEL Cell death abnormality protein 1	ced-1	sp|Q9XWD6|CED1_CAEEL Cell death abnormality protein 1 OS=Caenorhabditis elegans OX=6239 GN=ced-1 PE=1 SV=1	1	3	3	3.9	118.8	1111	0.8	3.9	30316000	207810000000
Q8IG31;H2KZL7;A0A0K3AUJ9;Q21824	CAEEL Thioredoxin domain-containing protein	prdx-2	tr|Q8IG31|Q8IG31_CAEEL Thioredoxin domain-containing protein OS=Caenorhabditis elegans OX=6239 GN=prdx-2 PE=1 SV=1;tr|H2KZL7|H2KZL7_CAEEL Thioredoxin domain-containing protein OS=Caenorhabditis elegans OX=6239 GN=prdx-2 PE=1 SV=1;tr|A0A0K3AUJ9|A0A0K3AUJ9_C	4	2	2	7.7	21.785	195	7.7	0	116210000	0
A0A0M7RDX7;Q9N4X8	CAEEL GST C-terminal domain-containing protein	gst-10	tr|A0A0M7RDX7|A0A0M7RDX7_CAEEL GST C-terminal domain-containing protein OS=Caenorhabditis elegans OX=6239 GN=gst-10 PE=1 SV=1;sp|Q9N4X8|GSTPA_CAEEL Glutathione S-transferase P 10 OS=Caenorhabditis elegans OX=6239 GN=gst-10 PE=1 SV=3	2	2	2	14.3	14.282	119	14.3	0	57808000	0
A0A2C9C2Z1;A0A2C9C3A7;Q9N4M4	CAEEL KASH domain-containing protein	anc-1	tr|A0A2C9C2Z1|A0A2C9C2Z1_CAEEL KASH domain-containing protein OS=Caenorhabditis elegans OX=6239 GN=anc-1 PE=1 SV=1;tr|A0A2C9C3A7|A0A2C9C3A7_CAEEL Nuclear anchorage protein 1 OS=Caenorhabditis elegans OX=6239 GN=anc-1 PE=1 SV=1;sp|Q9N4M4|ANC1_CAEEL Nuclear	3	2	2	1.6	840.47	7540	1.6	0	22178000	0
A0A2C9C3L5;P98080;A0A2C9C366;A0A2C9C3F6	CAEEL Cytochrome b-c1 complex subunit 1, mitochondrial	ucr-1	tr|A0A2C9C3L5|A0A2C9C3L5_CAEEL Cytochrome b-c1 complex subunit 1, mitochondrial OS=Caenorhabditis elegans OX=6239 GN=ucr-1 PE=1 SV=1;sp|P98080|UCR1_CAEEL Cytochrome b-c1 complex subunit 1, mitochondrial OS=Caenorhabditis elegans OX=6239 GN=ucr-1 PE=3 SV=2;	4	2	2	4	51.948	473	4	0	20261000	0
A7LPE6;P34517;A7LPE5;Q7JMU1	CAEEL Glycerol-3-phosphate dehydrogenase [NAD(+)]	gpdh-2	tr|A7LPE6|A7LPE6_CAEEL Glycerol-3-phosphate dehydrogenase [NAD(+)] OS=Caenorhabditis elegans OX=6239 GN=gpdh-2 PE=1 SV=1;sp|P34517|GPDH2_CAEEL Probable glycerol-3-phosphate dehydrogenase 2 OS=Caenorhabditis elegans OX=6239 GN=gpdh-2 PE=3 SV=2;tr|A7LPE5|A7L	4	2	2	4.7	39.281	360	4.7	2.5	32029000	0
A8WHP8	CAEEL Perilipin-1 homolog	plin-1	sp|A8WHP8|PLIN1_CAEEL Perilipin-1 homolog OS=Caenorhabditis elegans OX=6239 GN=plin-1 PE=1 SV=1	1	2	2	5	46.523	418	5	0	39099000	0
Q17948;Q9U3Q1;H9G2X3;A9UJN4	CAEEL Serine/threonine protein phosphatase 2A regulatory subunit	pptr-2	tr|Q17948|Q17948_CAEEL Serine/threonine protein phosphatase 2A regulatory subunit OS=Caenorhabditis elegans OX=6239 GN=pptr-2 PE=1 SV=1;tr|Q9U3Q1|Q9U3Q1_CAEEL Serine/threonine protein phosphatase 2A regulatory subunit OS=Caenorhabditis elegans OX=6239 GN=p	4	2	2	3.1	64.441	557	3.1	0	49690000	0
C0HLB4;C0HLB3	CAEEL V-type proton ATPase 16 kDa proteolipid subunit 3	vha-3	sp|C0HLB4|VATL3_CAEEL V-type proton ATPase 16 kDa proteolipid subunit 3 OS=Caenorhabditis elegans OX=6239 GN=vha-3 PE=2 SV=1;sp|C0HLB3|VATL2_CAEEL V-type proton ATPase 16 kDa proteolipid subunit 2 OS=Caenorhabditis elegans OX=6239 GN=vha-2 PE=2 SV=1	2	2	2	13	16.409	161	13	5.6	84980000	80994000
G1K101;G1K104	CAEEL SNF2_N domain-containing protein	CELE_M04C3.2	tr|G1K101|G1K101_CAEEL SNF2_N domain-containing protein OS=Caenorhabditis elegans OX=6239 GN=CELE_M04C3.2 PE=1 SV=1;tr|G1K104|G1K104_CAEEL SNF2_N domain-containing protein OS=Caenorhabditis elegans OX=6239 GN=CELE_M04C3.2 PE=1 SV=1	2	2	2	7.1	67.558	578	1.7	5.4	25286000	0
G3MU69;O45865;Q17407	CAEEL Adenine Nucleotide Translocator	ant-1.1	tr|G3MU69|G3MU69_CAEEL Adenine Nucleotide Translocator OS=Caenorhabditis elegans OX=6239 GN=ant-1.1 PE=1 SV=1;tr|O45865|O45865_CAEEL Adenine Nucleotide Translocator OS=Caenorhabditis elegans OX=6239 GN=ant-1.1 PE=1 SV=1;tr|Q17407|Q17407_CAEEL ADP/ATP trans	3	2	2	8.7	26.854	242	8.7	0	19009000	0
G5EBF3	CAEEL Protein Up-regulated in Daf-2(Gf)	pud-2.1	tr|G5EBF3|G5EBF3_CAEEL Protein Up-regulated in Daf-2(Gf) OS=Caenorhabditis elegans OX=6239 GN=pud-2.1 PE=1 SV=1	1	2	2	14.3	17.428	154	14.3	0	16066000	0
G5EBK0	CAEEL DEP domain-containing protein	CELE_T08A11.1	tr|G5EBK0|G5EBK0_CAEEL DEP domain-containing protein OS=Caenorhabditis elegans OX=6239 GN=CELE_T08A11.1 PE=1 SV=1	1	2	2	1.4	213.92	1872	1.4	0	12044000	0
G5EDV7	CAEEL Uncharacterized protein	CELE_Y53H1B.2	tr|G5EDV7|G5EDV7_CAEEL Uncharacterized protein OS=Caenorhabditis elegans OX=6239 GN=CELE_Y53H1B.2 PE=1 SV=1	1	2	2	9.5	25.731	222	9.5	4.5	14502000	15630000
G5EE04	CAEEL TPR_REGION domain-containing protein	hip-1	tr|G5EE04|G5EE04_CAEEL TPR_REGION domain-containing protein OS=Caenorhabditis elegans OX=6239 GN=hip-1 PE=1 SV=1	1	2	2	4	44.744	422	1.9	2.1	0	41727000
G5EEV5	CAEEL 5C820	pud-3	tr|G5EEV5|G5EEV5_CAEEL 5C820 OS=Caenorhabditis elegans OX=6239 GN=pud-3 PE=1 SV=1	1	2	2	15.1	19.437	172	15.1	8.7	30182000	14600000
G5EFM7	CAEEL Uncharacterized protein	CELE_F18C12.3	tr|G5EFM7|G5EFM7_CAEEL Uncharacterized protein OS=Caenorhabditis elegans OX=6239 GN=CELE_F18C12.3 PE=1 SV=1	1	2	2	3.5	61.661	545	3.5	0	12814000	0
I7FW32;Q9UAQ6	CAEEL Rab-1 (Fragment)	rab-1	tr|I7FW32|I7FW32_CAEEL Rab-1 (Fragment) OS=Caenorhabditis elegans OX=6239 GN=rab-1 PE=2 SV=1;tr|Q9UAQ6|Q9UAQ6_CAEEL RAB family OS=Caenorhabditis elegans OX=6239 GN=rab-1 PE=1 SV=1	2	2	2	11.8	22.414	204	11.8	4.9	265560000	127780000
O01541	CAEEL Alanine--tRNA ligase, cytoplasmic	aars-2	sp|O01541|SYAC_CAEEL Alanine--tRNA ligase, cytoplasmic OS=Caenorhabditis elegans OX=6239 GN=aars-2 PE=2 SV=1	1	2	2	2.3	106.78	968	2.3	0.9	32272000	33888000
O02286;Q7JKI1;Q7JKI3;Q7JKI2	CAEEL Phosphoenolypyruvate CarboxyKinase	pck-2	tr|O02286|O02286_CAEEL Phosphoenolypyruvate CarboxyKinase OS=Caenorhabditis elegans OX=6239 GN=pck-2 PE=1 SV=1;tr|Q7JKI1|Q7JKI1_CAEEL Phosphoenolypyruvate CarboxyKinase OS=Caenorhabditis elegans OX=6239 GN=pck-2 PE=1 SV=1;tr|Q7JKI3|Q7JKI3_CAEEL Phosphoenol	4	2	2	2.6	73.431	654	2.6	2.6	335700000	183800000
O17328	CAEEL MFS domain-containing protein	mct-6	tr|O17328|O17328_CAEEL MFS domain-containing protein OS=Caenorhabditis elegans OX=6239 GN=mct-6 PE=1 SV=2	1	2	2	3.5	63.517	594	3.5	1.9	107690000	69439000
O17759	CAEEL Transket_pyr domain-containing protein	tkt-1	tr|O17759|O17759_CAEEL Transket_pyr domain-containing protein OS=Caenorhabditis elegans OX=6239 GN=tkt-1 PE=1 SV=1	1	2	2	3.2	66.01	618	3.2	1.5	75076000	106430000
O17861	CAEEL GILT-like protein F37H8.5	F37H8.5	sp|O17861|YVRI_CAEEL GILT-like protein F37H8.5 OS=Caenorhabditis elegans OX=6239 GN=F37H8.5 PE=1 SV=1	1	2	2	6.1	30.844	277	6.1	0	41347000	0
O18650	CAEEL 40S ribosomal protein S19	rps-19	sp|O18650|RS19_CAEEL 40S ribosomal protein S19 OS=Caenorhabditis elegans OX=6239 GN=rps-19 PE=2 SV=1	1	2	2	11	16.322	146	11	11	121430000	135730000
O45577	CAEEL RRM domain-containing protein	cpf-2	tr|O45577|O45577_CAEEL RRM domain-containing protein OS=Caenorhabditis elegans OX=6239 GN=cpf-2 PE=1 SV=1	1	2	2	6.5	37.035	336	6.5	3	48549000	10870000
U4PC51;O61199	CAEEL Transket_pyr domain-containing protein	ogdh-1	tr|U4PC51|U4PC51_CAEEL Transket_pyr domain-containing protein OS=Caenorhabditis elegans OX=6239 GN=ogdh-1 PE=1 SV=1;sp|O61199|ODO1_CAEEL 2-oxoglutarate dehydrogenase, mitochondrial OS=Caenorhabditis elegans OX=6239 GN=ogdh-1 PE=1 SV=2	2	2	2	2.6	90.993	802	2.6	1.4	156950000	23604000
O61235;U4PE16;Q8MYL7;Q27487	CAEEL Catalase-2	ctl-1	sp|O61235|CATA2_CAEEL Catalase-2 OS=Caenorhabditis elegans OX=6239 GN=ctl-1 PE=1 SV=3;tr|U4PE16|U4PE16_CAEEL Catalase OS=Caenorhabditis elegans OX=6239 GN=ctl-3 PE=1 SV=1;tr|Q8MYL7|Q8MYL7_CAEEL Catalase OS=Caenorhabditis elegans OX=6239 GN=ctl-3 PE=1 SV=1;	4	2	2	5	57.304	497	5	2	41664000	32232000
P17331;P04970;P17330;P17329	CAEEL Glyceraldehyde-3-phosphate dehydrogenase 4	gpd-4	sp|P17331|G3P4_CAEEL Glyceraldehyde-3-phosphate dehydrogenase 4 OS=Caenorhabditis elegans OX=6239 GN=gpd-4 PE=3 SV=1;sp|P04970|G3P1_CAEEL Glyceraldehyde-3-phosphate dehydrogenase 1 OS=Caenorhabditis elegans OX=6239 GN=gpd-1 PE=3 SV=1;sp|P17330|G3P3_CAEEL G	4	2	2	7.3	36.426	341	7.3	0	43644000	0
P27604	CAEEL Adenosylhomocysteinase	ahcy-1	sp|P27604|SAHH_CAEEL Adenosylhomocysteinase OS=Caenorhabditis elegans OX=6239 GN=ahcy-1 PE=3 SV=1	1	2	2	5.5	47.535	437	5.5	0	16441000	0
P27639	CAEEL Eukaryotic initiation factor 4A	inf-1	sp|P27639|IF4A_CAEEL Eukaryotic initiation factor 4A OS=Caenorhabditis elegans OX=6239 GN=inf-1 PE=2 SV=1	1	2	2	4.2	45.407	402	4.2	0	48866000	0
P34339	CAEEL Eukaryotic translation initiation factor 3 subunit A	egl-45	sp|P34339|EIF3A_CAEEL Eukaryotic translation initiation factor 3 subunit A OS=Caenorhabditis elegans OX=6239 GN=egl-45 PE=3 SV=1	1	2	2	2	124.41	1076	2	0.9	39930000	84607000
Q9TYW0;P34466	CAEEL Clustered mitochondria protein homolog	clu-1	tr|Q9TYW0|Q9TYW0_CAEEL Clustered mitochondria protein homolog OS=Caenorhabditis elegans OX=6239 GN=clu-1 PE=2 SV=1;sp|P34466|CLU_CAEEL Clustered mitochondria protein homolog OS=Caenorhabditis elegans OX=6239 GN=clu-1 PE=3 SV=1	2	2	2	1.5	139.99	1247	1.5	0	6627600	0
P34540	CAEEL Kinesin heavy chain	unc-116	sp|P34540|KINH_CAEEL Kinesin heavy chain OS=Caenorhabditis elegans OX=6239 GN=unc-116 PE=2 SV=2	1	2	2	2.5	91.893	815	1.3	1.1	1352500	0
P34689;Q966L9	CAEEL ATP-dependent RNA helicase glh-1	glh-1	sp|P34689|GLH1_CAEEL ATP-dependent RNA helicase glh-1 OS=Caenorhabditis elegans OX=6239 GN=glh-1 PE=1 SV=3;sp|Q966L9|GLH2_CAEEL ATP-dependent RNA helicase glh-2 OS=Caenorhabditis elegans OX=6239 GN=glh-2 PE=1 SV=1	2	2	2	2.5	79.779	763	2.5	1	98807000	155430000
P46563;G8JY45	CAEEL Fructose-bisphosphate aldolase 2	aldo-2	sp|P46563|ALF2_CAEEL Fructose-bisphosphate aldolase 2 OS=Caenorhabditis elegans OX=6239 GN=aldo-2 PE=2 SV=1;tr|G8JY45|G8JY45_CAEEL Fructose-bisphosphate aldolase OS=Caenorhabditis elegans OX=6239 GN=aldo-2 PE=1 SV=1	2	2	2	4.6	38.846	366	4.6	4.6	128070000	303980000
P47207	CAEEL T-complex protein 1 subunit beta	cct-2	sp|P47207|TCPB_CAEEL T-complex protein 1 subunit beta OS=Caenorhabditis elegans OX=6239 GN=cct-2 PE=1 SV=2	1	2	2	3.6	56.974	529	3.6	0	39379000	0
P49041	CAEEL 40S ribosomal protein S5	rps-5	sp|P49041|RS5_CAEEL 40S ribosomal protein S5 OS=Caenorhabditis elegans OX=6239 GN=rps-5 PE=3 SV=1	1	2	2	8.1	23.154	210	8.1	0	90682000	0
P50093	CAEEL Mitochondrial prohibitin complex protein 2	phb-2	sp|P50093|PHB2_CAEEL Mitochondrial prohibitin complex protein 2 OS=Caenorhabditis elegans OX=6239 GN=phb-2 PE=1 SV=2	1	2	2	7.1	32.667	294	7.1	0	46974000	0
Q27522;P50306;P50305;O17680	CAEEL Probable S-adenosylmethionine synthase 5	sams-5	sp|Q27522|METK5_CAEEL Probable S-adenosylmethionine synthase 5 OS=Caenorhabditis elegans OX=6239 GN=sams-5 PE=3 SV=2;sp|P50306|METK4_CAEEL Probable S-adenosylmethionine synthase 4 OS=Caenorhabditis elegans OX=6239 GN=sams-4 PE=1 SV=1;sp|P50305|METK3_CAEEL	4	2	2	4	43.949	404	4	4	265550000	438370000
P52713	CAEEL Probable methylmalonate-semialdehyde dehydrogenase [acylating], mitochondrial	alh-8	sp|P52713|MMSA_CAEEL Probable methylmalonate-semialdehyde dehydrogenase [acylating], mitochondrial OS=Caenorhabditis elegans OX=6239 GN=alh-8 PE=3 SV=1	1	2	2	4.4	56.461	523	4.4	0	67184000	0
P53596	CAEEL Succinate--CoA ligase [ADP/GDP-forming] subunit alpha, mitochondrial	sucl-1	sp|P53596|SUCA_CAEEL Succinate--CoA ligase [ADP/GDP-forming] subunit alpha, mitochondrial OS=Caenorhabditis elegans OX=6239 GN=sucl-1 PE=3 SV=1	1	2	2	6.5	33.797	322	6.5	2.8	89580000	94272000
P91027	CAEEL Calponin-homology (CH) domain-containing protein	chdp-1	tr|P91027|P91027_CAEEL Calponin-homology (CH) domain-containing protein OS=Caenorhabditis elegans OX=6239 GN=chdp-1 PE=1 SV=1	1	2	2	9.2	35.916	338	9.2	3.6	9585400	20774000
P91306	CAEEL CSD_1 domain-containing protein	cey-2	tr|P91306|P91306_CAEEL CSD_1 domain-containing protein OS=Caenorhabditis elegans OX=6239 GN=cey-2 PE=1 SV=1	1	2	2	7.1	29.404	267	3.7	3.4	9789000	0
P91453	CAEEL Uncharacterized protein	CELE_T19B4.5	tr|P91453|P91453_CAEEL Uncharacterized protein OS=Caenorhabditis elegans OX=6239 GN=CELE_T19B4.5 PE=1 SV=1	1	2	2	5	45.823	400	5	1.8	201610000	111770000
Q09607	CAEEL Probable glutathione S-transferase gst-36	gst-36	sp|Q09607|GST36_CAEEL Probable glutathione S-transferase gst-36 OS=Caenorhabditis elegans OX=6239 GN=gst-36 PE=3 SV=2	1	2	2	9	23.876	210	9	0	124760000	0
Q10661	CAEEL Dosage compensation protein dpy-30	dpy-30	sp|Q10661|DPY30_CAEEL Dosage compensation protein dpy-30 OS=Caenorhabditis elegans OX=6239 GN=dpy-30 PE=1 SV=1	1	2	2	20.3	12.837	123	20.3	20.3	46119000	66446000
Q17967	CAEEL Protein disulfide-isomerase 1	pdi-1	sp|Q17967|PDI1_CAEEL Protein disulfide-isomerase 1 OS=Caenorhabditis elegans OX=6239 GN=pdi-1 PE=3 SV=1	1	2	2	4.5	53.435	485	4.5	0	55050000	0
Q18066	CAEEL Disorganized muscle protein 1	dim-1	sp|Q18066|DIM_CAEEL Disorganized muscle protein 1 OS=Caenorhabditis elegans OX=6239 GN=dim-1 PE=1 SV=3	1	2	2	3.1	71.849	640	3.1	0	24067000	0
Q18655	CAEEL MFS domain-containing protein	C46C2.2	tr|Q18655|Q18655_CAEEL MFS domain-containing protein OS=Caenorhabditis elegans OX=6239 GN=C46C2.2 PE=1 SV=2	1	2	2	4.2	58.166	520	2.3	1.9	14400000	0
Q19626	CAEEL Probable V-type proton ATPase subunit B	vha-12	sp|Q19626|VATB_CAEEL Probable V-type proton ATPase subunit B OS=Caenorhabditis elegans OX=6239 GN=vha-12 PE=3 SV=1	1	2	2	4.5	54.75	491	4.5	0	60129000	0
Q20476	CAEEL BTB domain-containing protein	CELE_F46G10.1	tr|Q20476|Q20476_CAEEL BTB domain-containing protein OS=Caenorhabditis elegans OX=6239 GN=CELE_F46G10.1 PE=1 SV=3	1	2	2	11.2	20.368	178	11.2	11.2	113610000	8896900
W6EKY2;W6E8Z9;Q20655	CAEEL 14-3-3 zeta	ftt-2	tr|W6EKY2|W6EKY2_CAEEL 14-3-3 zeta OS=Caenorhabditis elegans OX=6239 GN=ftt-2 PE=1 SV=1;tr|W6E8Z9|W6E8Z9_CAEEL 14-3-3 zeta OS=Caenorhabditis elegans OX=6239 PE=3 SV=1;sp|Q20655|14332_CAEEL 14-3-3-like protein 2 OS=Caenorhabditis elegans OX=6239 GN=ftt-2 PE	3	4	2	14.5	27.732	248	14.5	6	74877000	0
Q20938	CAEEL Probable 26S proteasome regulatory subunit rpn-6.1	rpn-6.1	sp|Q20938|PS11A_CAEEL Probable 26S proteasome regulatory subunit rpn-6.1 OS=Caenorhabditis elegans OX=6239 GN=rpn-6.1 PE=2 SV=2	1	2	2	4.8	49.091	438	4.8	2.3	12909000	25691000
Q22235	CAEEL Endoplasmin homolog	enpl-1	sp|Q22235|ENPL1_CAEEL Endoplasmin homolog OS=Caenorhabditis elegans OX=6239 GN=enpl-1 PE=3 SV=1	1	3	2	4.7	87.111	760	4.7	1.2	38375000	0
Q22620;Q65ZK5	CAEEL Prolyl Amino-acyl tRNA Synthetase	pars-1	tr|Q22620|Q22620_CAEEL Prolyl Amino-acyl tRNA Synthetase OS=Caenorhabditis elegans OX=6239 GN=pars-1 PE=1 SV=1;tr|Q65ZK5|Q65ZK5_CAEEL Prolyl Amino-acyl tRNA Synthetase OS=Caenorhabditis elegans OX=6239 GN=pars-1 PE=1 SV=1	2	2	2	3.6	65.818	581	3.6	1.9	15190000	27307000
Q8T3D2;Q94010	CAEEL Uncharacterized protein	CELE_T08G11.1	tr|Q8T3D2|Q8T3D2_CAEEL Uncharacterized protein OS=Caenorhabditis elegans OX=6239 GN=CELE_T08G11.1 PE=1 SV=1;tr|Q94010|Q94010_CAEEL Uncharacterized protein OS=Caenorhabditis elegans OX=6239 GN=CELE_T08G11.1 PE=1 SV=1	2	2	2	0.8	356.56	3185	0.8	0	55072000	0
Q93168	CAEEL Aha1_N domain-containing protein	ahsa-1	tr|Q93168|Q93168_CAEEL Aha1_N domain-containing protein OS=Caenorhabditis elegans OX=6239 GN=ahsa-1 PE=1 SV=1	1	2	2	6.7	38.567	342	6.7	0	19734000	0
Q93545	CAEEL Uncharacterized protein	CELE_F20G2.2	tr|Q93545|Q93545_CAEEL Uncharacterized protein OS=Caenorhabditis elegans OX=6239 GN=CELE_F20G2.2 PE=1 SV=1	1	2	2	7.2	26.767	249	7.2	3.2	44646000	11969000
Q93934	CAEEL PfkB domain-containing protein	adk-1	tr|Q93934|Q93934_CAEEL PfkB domain-containing protein OS=Caenorhabditis elegans OX=6239 GN=adk-1 PE=1 SV=1	1	2	2	5.8	37.427	342	5.8	0	18495000	0
Q95008	CAEEL Proteasome subunit alpha type-5	pas-5	sp|Q95008|PSA5_CAEEL Proteasome subunit alpha type-5 OS=Caenorhabditis elegans OX=6239 GN=pas-5 PE=1 SV=1	1	2	2	9.7	27.207	248	9.7	0	8080900	0
Q95XJ0	CAEEL Uncharacterized protein	CELE_Y69A2AR.18	tr|Q95XJ0|Q95XJ0_CAEEL Uncharacterized protein OS=Caenorhabditis elegans OX=6239 GN=CELE_Y69A2AR.18 PE=1 SV=1	1	2	2	6.4	32.382	299	6.4	3.3	66733000	87371000
Q95XR0	CAEEL Tr-type G domain-containing protein	eif-2gamma	tr|Q95XR0|Q95XR0_CAEEL Tr-type G domain-containing protein OS=Caenorhabditis elegans OX=6239 GN=eif-2gamma PE=1 SV=1	1	2	2	4.1	51.234	469	4.1	2.1	31845000	12655000
Q95Y04	CAEEL 40S ribosomal protein S28	rps-28	sp|Q95Y04|RS28_CAEEL 40S ribosomal protein S28 OS=Caenorhabditis elegans OX=6239 GN=rps-28 PE=3 SV=1	1	2	2	32.3	7.4365	65	15.4	16.9	1643000	0
Q95YF3	CAEEL ATP-dependent RNA helicase cgh-1	cgh-1	sp|Q95YF3|CGH1_CAEEL ATP-dependent RNA helicase cgh-1 OS=Caenorhabditis elegans OX=6239 GN=cgh-1 PE=1 SV=1	1	2	2	6.3	48.713	430	6.3	6.3	179050000	359290000
Q9BKU4	CAEEL Mitochondrial prohibitin complex protein 1	phb-1	sp|Q9BKU4|PHB1_CAEEL Mitochondrial prohibitin complex protein 1 OS=Caenorhabditis elegans OX=6239 GN=phb-1 PE=1 SV=1	1	2	2	8.7	29.988	275	8.7	3.3	31898000	33907000
Q9GRZ9	CAEEL Transmembrane and Coiled-Coil protein	tcc-1	tr|Q9GRZ9|Q9GRZ9_CAEEL Transmembrane and Coiled-Coil protein OS=Caenorhabditis elegans OX=6239 GN=tcc-1 PE=1 SV=1	1	2	2	3.3	75.891	676	3.3	0	18552000	0
Q9GZH4	CAEEL Dolichyl-diphosphooligosaccharide--protein glycosyltransferase subunit 1	ribo-1	sp|Q9GZH4|RPN1_CAEEL Dolichyl-diphosphooligosaccharide--protein glycosyltransferase subunit 1 OS=Caenorhabditis elegans OX=6239 GN=ribo-1 PE=3 SV=2	1	2	2	3.6	65.736	586	3.6	1.7	66983000	24815000
Q9U2H9	CAEEL Probable elongation factor 1-beta/1-delta 2	eef-1B.2	sp|Q9U2H9|EF1B2_CAEEL Probable elongation factor 1-beta/1-delta 2 OS=Caenorhabditis elegans OX=6239 GN=eef-1B.2 PE=1 SV=4	1	2	2	9.9	28.172	263	9.9	3	21150000	117410000
Q9U2Q9	CAEEL Glycogen synthase kinase-3	gsk-3	sp|Q9U2Q9|GSK3_CAEEL Glycogen synthase kinase-3 OS=Caenorhabditis elegans OX=6239 GN=gsk-3 PE=1 SV=1	1	2	2	6.1	40.882	362	6.1	0	26920000	0
Q9XWT3	CAEEL Uterine Lumin Expressed/locailized	ule-5	tr|Q9XWT3|Q9XWT3_CAEEL Uterine Lumin Expressed/locailized OS=Caenorhabditis elegans OX=6239 GN=ule-5 PE=1 SV=1	1	2	2	13.3	19.533	181	13.3	6.6	127230000	46200000
Q9XXK1	CAEEL ATP synthase subunit alpha, mitochondrial	atp-1	sp|Q9XXK1|ATPA_CAEEL ATP synthase subunit alpha, mitochondrial OS=Caenorhabditis elegans OX=6239 GN=atp-1 PE=1 SV=1	1	2	2	4.8	57.787	538	4.8	0	60428000	0
H9G2V3;A0A061ACJ8;A0A061AKQ5;A0A061AJ06;A0A061ADU4;H9G2V2;A0A061ACM9;A0A061ACJ2;A0A061ADT8;A0A061ACM4;A0A061AKP8;Q23658	CAEEL Calcium-dependent secretion activator	unc-31	tr|H9G2V3|H9G2V3_CAEEL Calcium-dependent secretion activator OS=Caenorhabditis elegans OX=6239 GN=unc-31 PE=1 SV=1;tr|A0A061ACJ8|A0A061ACJ8_CAEEL Calcium-dependent secretion activator OS=Caenorhabditis elegans OX=6239 GN=unc-31 PE=1 SV=1;tr|A0A061AKQ5|A0A0	12	1	1	0.8	154.84	1366	0.8	0.8	21077000	509670000
K8FDX2;A0A0K3AWP0;A0A0K3AUC2;A0A0K3ATS1;A0A0K3ARC0;A0A0K3AQT4;Q22866	CAEEL Uncharacterized protein	lev-11	tr|K8FDX2|K8FDX2_CAEEL Uncharacterized protein OS=Caenorhabditis elegans OX=6239 GN=lev-11 PE=1 SV=1;tr|A0A0K3AWP0|A0A0K3AWP0_CAEEL Uncharacterized protein OS=Caenorhabditis elegans OX=6239 GN=lev-11 PE=1 SV=1;tr|A0A0K3AUC2|A0A0K3AUC2_CAEEL Uncharacterized	7	1	1	3.9	33.004	284	3.9	0	0	0
A0A0K3AUF2;A0A0K3AQW3	CAEEL Uncharacterized protein	B0432.7	tr|A0A0K3AUF2|A0A0K3AUF2_CAEEL Uncharacterized protein OS=Caenorhabditis elegans OX=6239 GN=B0432.7 PE=1 SV=1;tr|A0A0K3AQW3|A0A0K3AQW3_CAEEL Uncharacterized protein OS=Caenorhabditis elegans OX=6239 GN=B0432.7 PE=1 SV=1	2	1	1	0.9	98.833	871	0.9	0	1675100	0
A0A0K3AXL9;A0A0K3AVC3	CAEEL Uncharacterized protein	C05E4.15	tr|A0A0K3AXL9|A0A0K3AXL9_CAEEL Uncharacterized protein OS=Caenorhabditis elegans OX=6239 GN=C05E4.15 PE=4 SV=1;tr|A0A0K3AVC3|A0A0K3AVC3_CAEEL Uncharacterized protein OS=Caenorhabditis elegans OX=6239 GN=C05E4.15 PE=4 SV=1	2	1	1	4.2	28.058	239	4.2	0	5824700	0
A0A0M9JJ85;A0A0M7RDU5;H2L075;Q8MXD8;Q9NL87;Q5PY59;V6CLU5;V6CKH1;V6CLT3;V6CLU0;V6CJB8;V6CLP5	CAEEL KETtiN (Drosophila actin-binding) homolog	ketn-1	tr|A0A0M9JJ85|A0A0M9JJ85_CAEEL KETtiN (Drosophila actin-binding) homolog OS=Caenorhabditis elegans OX=6239 GN=ketn-1 PE=1 SV=1;tr|A0A0M7RDU5|A0A0M7RDU5_CAEEL KETtiN (Drosophila actin-binding) homolog OS=Caenorhabditis elegans OX=6239 GN=ketn-1 PE=1 SV=1;tr	12	1	1	0.3	362.3	3260	0.3	0	2987900	0
A0A131MBB1;A0A131MC76;A0A131MAQ8;A0A131MAV3	CAEEL Histone acetyltransferase	mys-2	tr|A0A131MBB1|A0A131MBB1_CAEEL Histone acetyltransferase OS=Caenorhabditis elegans OX=6239 GN=mys-2 PE=1 SV=1;tr|A0A131MC76|A0A131MC76_CAEEL Histone acetyltransferase OS=Caenorhabditis elegans OX=6239 GN=mys-2 PE=1 SV=1;tr|A0A131MAQ8|A0A131MAQ8_CAEEL Histo	4	1	1	5.5	19.088	163	5.5	0	27263000	0
A0A1N7SYP7;A0A1N7SYR1;A0A1N7SYP6;Q95QW0	CAEEL Eukaryotic translation initiation factor 3 subunit L	eif-3.l	tr|A0A1N7SYP7|A0A1N7SYP7_CAEEL Eukaryotic translation initiation factor 3 subunit L OS=Caenorhabditis elegans OX=6239 GN=eif-3.l PE=1 SV=1;tr|A0A1N7SYR1|A0A1N7SYR1_CAEEL Eukaryotic translation initiation factor 3 subunit L OS=Caenorhabditis elegans OX=6239	4	1	1	1.8	57.235	492	1.8	1.8	58136000	95856000
A0A1X7RC97	CAEEL Uncharacterized protein	CELE_T21F4.1	tr|A0A1X7RC97|A0A1X7RC97_CAEEL Uncharacterized protein OS=Caenorhabditis elegans OX=6239 GN=CELE_T21F4.1 PE=1 SV=1	1	1	1	2.8	35.953	327	2.8	2.8	0	33340000
A0A2K5AU02;A0A2K5ATZ5	CAEEL G_PROTEIN_RECEP_F1_2 domain-containing protein	aexr-1	tr|A0A2K5AU02|A0A2K5AU02_CAEEL G_PROTEIN_RECEP_F1_2 domain-containing protein OS=Caenorhabditis elegans OX=6239 GN=aexr-1 PE=4 SV=1;tr|A0A2K5ATZ5|A0A2K5ATZ5_CAEEL G_PROTEIN_RECEP_F1_2 domain-containing protein OS=Caenorhabditis elegans OX=6239 GN=aexr-1 PE	2	1	1	2.8	48.128	422	2.8	0	5991000	0
A0A2R8F5A8	CAEEL Uncharacterized protein	CELE_F53G2.12	tr|A0A2R8F5A8|A0A2R8F5A8_CAEEL Uncharacterized protein OS=Caenorhabditis elegans OX=6239 GN=CELE_F53G2.12 PE=3 SV=1	1	1	1	10	10.771	90	10	0	12131000	0
A0A3P6N643;Q17413	CAEEL PRK domain-containing protein	B0001.4	tr|A0A3P6N643|A0A3P6N643_CAEEL PRK domain-containing protein OS=Caenorhabditis elegans OX=6239 GN=B0001.4 PE=1 SV=1;sp|Q17413|UCK_CAEEL Probable uridine-cytidine kinase OS=Caenorhabditis elegans OX=6239 GN=B0001.4 PE=3 SV=2	2	1	1	4.5	25.434	222	4.5	0	4712800	0
A0A3P6P9B9;A0A3P6NPD2;H8ESF4;A0A3P6NNV9;G5EF87;H8ESF3	CAEEL SANT domain-containing protein	swsn-1	tr|A0A3P6P9B9|A0A3P6P9B9_CAEEL SANT domain-containing protein OS=Caenorhabditis elegans OX=6239 GN=swsn-1 PE=1 SV=1;tr|A0A3P6NPD2|A0A3P6NPD2_CAEEL SANT domain-containing protein OS=Caenorhabditis elegans OX=6239 GN=swsn-1 PE=1 SV=1;tr|H8ESF4|H8ESF4_CAEEL S	6	1	1	1.9	55.553	519	1.9	1.9	0	36097000
Q21541;A0A486WUL5	CAEEL AD domain-containing protein	CELE_M142.5	tr|Q21541|Q21541_CAEEL AD domain-containing protein OS=Caenorhabditis elegans OX=6239 GN=CELE_M142.5 PE=1 SV=2;tr|A0A486WUL5|A0A486WUL5_CAEEL AD domain-containing protein OS=Caenorhabditis elegans OX=6239 GN=CELE_M142.5 PE=1 SV=1	2	1	1	3.8	22.956	209	3.8	0	6458200	0
H2L0N9;A0A486WV52;Q6AW03;A0A486WWC6	CAEEL Uncharacterized protein	CELE_Y37E3.17	tr|H2L0N9|H2L0N9_CAEEL Uncharacterized protein OS=Caenorhabditis elegans OX=6239 GN=CELE_Y37E3.17 PE=1 SV=1;tr|A0A486WV52|A0A486WV52_CAEEL Uncharacterized protein OS=Caenorhabditis elegans OX=6239 GN=CELE_Y37E3.17 PE=1 SV=1;tr|Q6AW03|Q6AW03_CAEEL Uncharact	4	1	1	0.8	91.821	830	0.8	0.8	78783000	27361000
Q9GRY9;A0A4V0ILI5	CAEEL KH domain-containing protein	nova-1	tr|Q9GRY9|Q9GRY9_CAEEL KH domain-containing protein OS=Caenorhabditis elegans OX=6239 GN=nova-1 PE=1 SV=1;tr|A0A4V0ILI5|A0A4V0ILI5_CAEEL KH domain-containing protein OS=Caenorhabditis elegans OX=6239 GN=nova-1 PE=1 SV=1	2	1	1	2.7	42.115	413	2.7	2.7	5802700	24603000
A5HU89;Q65ZK0;Q19825	CAEEL Probable arginine--tRNA ligase, cytoplasmic	rars-1	tr|A5HU89|A5HU89_CAEEL Probable arginine--tRNA ligase, cytoplasmic OS=Caenorhabditis elegans OX=6239 GN=rars-1 PE=1 SV=1;tr|Q65ZK0|Q65ZK0_CAEEL Probable arginine--tRNA ligase, cytoplasmic OS=Caenorhabditis elegans OX=6239 GN=rars-1 PE=1 SV=1;sp|Q19825|SYRC	3	1	1	15.7	11.642	108	15.7	15.7	15448000	0
A5JVN7	CAEEL LAD-2 short isoform	lad-2	tr|A5JVN7|A5JVN7_CAEEL LAD-2 short isoform OS=Caenorhabditis elegans OX=6239 GN=lad-2 PE=2 SV=1	1	1	1	1.8	56.31	500	1.8	0	9891200	0
Q9U207;A5PEX6;G2HK02;K8ESL3;G2HK03	CAEEL MATH domain-containing protein	pqn-87	tr|Q9U207|Q9U207_CAEEL MATH domain-containing protein OS=Caenorhabditis elegans OX=6239 GN=pqn-87 PE=1 SV=3;tr|A5PEX6|A5PEX6_CAEEL MATH domain-containing protein OS=Caenorhabditis elegans OX=6239 GN=pqn-87 PE=1 SV=1;tr|G2HK02|G2HK02_CAEEL MATH domain-conta	5	1	1	1	160.97	1456	1	0	0	0
A7DT45	CAEEL Uncharacterized protein	oxy-5	tr|A7DT45|A7DT45_CAEEL Uncharacterized protein OS=Caenorhabditis elegans OX=6239 GN=oxy-5 PE=1 SV=1	1	1	1	10.5	17.864	162	10.5	0	5995300	0
A8WI68;Q9XU13;G5EEK8	CAEEL Calcium-transporting ATPase	sca-1	tr|A8WI68|A8WI68_CAEEL Calcium-transporting ATPase OS=Caenorhabditis elegans OX=6239 GN=sca-1 PE=1 SV=1;tr|Q9XU13|Q9XU13_CAEEL Calcium-transporting ATPase OS=Caenorhabditis elegans OX=6239 GN=sca-1 PE=1 SV=1;tr|G5EEK8|G5EEK8_CAEEL Calcium-transporting ATPa	3	1	1	1.3	101.26	932	1.3	0	6324200	0
Q18494;A9UJN7;P91859	CAEEL Microtubule-Associated Protein Homolog	maph-1.3	tr|Q18494|Q18494_CAEEL Microtubule-Associated Protein Homolog OS=Caenorhabditis elegans OX=6239 GN=maph-1.3 PE=1 SV=2;tr|A9UJN7|A9UJN7_CAEEL Microtubule-Associated Protein Homolog OS=Caenorhabditis elegans OX=6239 GN=maph-1.2 PE=1 SV=1;sp|P91859|MAP11_CAEE	3	1	1	0.9	91.994	874	0.9	0	65135000	0
B1Q255;B1Q254	CAEEL Uncharacterized protein	C14H10.3	tr|B1Q255|B1Q255_CAEEL Uncharacterized protein OS=Caenorhabditis elegans OX=6239 GN=C14H10.3 PE=1 SV=1;tr|B1Q254|B1Q254_CAEEL Uncharacterized protein OS=Caenorhabditis elegans OX=6239 GN=C14H10.3 PE=1 SV=1	2	1	1	1.2	81.826	734	1.2	0	7101400	0
B3CJ34	CAEEL TOG domain-containing protein	gcn-1	tr|B3CJ34|B3CJ34_CAEEL TOG domain-containing protein OS=Caenorhabditis elegans OX=6239 GN=gcn-1 PE=1 SV=2	1	1	1	0.4	291.6	2651	0.4	0	9662600	0
G8JY79;B6EU49;P53014	CAEEL EF-hand domain-containing protein	mlc-3	tr|G8JY79|G8JY79_CAEEL EF-hand domain-containing protein OS=Caenorhabditis elegans OX=6239 GN=mlc-3 PE=1 SV=1;tr|B6EU49|B6EU49_CAEEL Alkali myosin light chain long isoform OS=Caenorhabditis elegans OX=6239 GN=mlc-3 PE=4 SV=1;sp|P53014|MLE_CAEEL Myosin, ess	3	1	1	12.2	10.25	90	12.2	0	22433000	0
C6KRI9;X5M900;Q22847;X5M5W2	CAEEL Uncharacterized protein	CELE_T28C6.7	tr|C6KRI9|C6KRI9_CAEEL Uncharacterized protein OS=Caenorhabditis elegans OX=6239 GN=CELE_T28C6.7 PE=1 SV=1;tr|X5M900|X5M900_CAEEL Uncharacterized protein OS=Caenorhabditis elegans OX=6239 GN=CELE_T28C6.7 PE=1 SV=1;tr|Q22847|Q22847_CAEEL Uncharacterized pro	4	1	1	0.9	264.16	2300	0.9	0	3415900	0
D7SFP5;O02335;C6KRN3	CAEEL Protein YIPF	CELE_W02D9.2	tr|D7SFP5|D7SFP5_CAEEL Protein YIPF OS=Caenorhabditis elegans OX=6239 GN=CELE_W02D9.2 PE=1 SV=1;tr|O02335|O02335_CAEEL Protein YIPF OS=Caenorhabditis elegans OX=6239 GN=CELE_W02D9.2 PE=1 SV=2;tr|C6KRN3|C6KRN3_CAEEL Protein YIPF OS=Caenorhabditis elegans OX	3	1	1	3.7	23.677	215	3.7	0	1756900	0
D0IMZ6;U4PR97;U4PM09;U4PEE8;U4PRA0;U4PM04;U4PBK4;U4PB58;U4PEF1;D0IMZ7;U4PEE3;D0IMZ8;U4PB53;D0IMZ5;U4PR92;U4PM01;U4PBJ9	CAEEL FiLamiN (Actin binding protein) homolog	fln-1	tr|D0IMZ6|D0IMZ6_CAEEL FiLamiN (Actin binding protein) homolog OS=Caenorhabditis elegans OX=6239 GN=fln-1 PE=1 SV=1;tr|U4PR97|U4PR97_CAEEL Calponin-homology (CH) domain-containing protein OS=Caenorhabditis elegans OX=6239 GN=fln-1 PE=1 SV=1;tr|U4PM09|U4PM0	17	1	1	1.8	89.307	836	1.8	0	0	0
D1MN68;P17343	CAEEL WD_REPEATS_REGION domain-containing protein	gpb-1	tr|D1MN68|D1MN68_CAEEL WD_REPEATS_REGION domain-containing protein OS=Caenorhabditis elegans OX=6239 GN=gpb-1 PE=1 SV=1;sp|P17343|GBB1_CAEEL Guanine nucleotide-binding protein subunit beta-1 OS=Caenorhabditis elegans OX=6239 GN=gpb-1 PE=1 SV=2	2	1	1	7.8	16.732	153	7.8	0	3391900	0
E1B6S4;Q9BI97	CAEEL Uncharacterized protein	CELE_F17C11.11	tr|E1B6S4|E1B6S4_CAEEL Uncharacterized protein OS=Caenorhabditis elegans OX=6239 GN=CELE_F17C11.11 PE=1 SV=1;tr|Q9BI97|Q9BI97_CAEEL Uncharacterized protein OS=Caenorhabditis elegans OX=6239 GN=CELE_F17C11.11 PE=1 SV=1	2	1	1	7.8	29.219	244	7.8	0	30740000	0
E1NZ09	CAEEL GLoBin related	glb-29	tr|E1NZ09|E1NZ09_CAEEL GLoBin related OS=Caenorhabditis elegans OX=6239 GN=glb-29 PE=4 SV=1	1	1	1	5.6	26.349	231	5.6	0	39888000	0
E2JL06;P91917	CAEEL YchF-GTPase_C domain-containing protein	ola-1	tr|E2JL06|E2JL06_CAEEL YchF-GTPase_C domain-containing protein OS=Caenorhabditis elegans OX=6239 GN=ola-1 PE=1 SV=1;sp|P91917|OLA1_CAEEL Obg-like ATPase 1 OS=Caenorhabditis elegans OX=6239 GN=ola-1 PE=3 SV=1	2	1	1	8	13.951	125	8	0	2685600	0
F5GUH0;F5GUG9;F5GUG8;F5GUG7;F5GUG6;F5GUH2	CAEEL Uncharacterized protein	CELE_W05B5.1	tr|F5GUH0|F5GUH0_CAEEL Uncharacterized protein OS=Caenorhabditis elegans OX=6239 GN=CELE_W05B5.1 PE=1 SV=1;tr|F5GUG9|F5GUG9_CAEEL Uncharacterized protein OS=Caenorhabditis elegans OX=6239 GN=CELE_W05B5.1 PE=1 SV=1;tr|F5GUG8|F5GUG8_CAEEL Uncharacterized pro	6	1	1	8	14.197	125	8	0	0	0
G1K0V8;Q20751;P34563	CAEEL Eukaryotic translation initiation factor 5A	iff-1	tr|G1K0V8|G1K0V8_CAEEL Eukaryotic translation initiation factor 5A OS=Caenorhabditis elegans OX=6239 GN=iff-1 PE=1 SV=1;sp|Q20751|IF5A2_CAEEL Eukaryotic translation initiation factor 5A-2 OS=Caenorhabditis elegans OX=6239 GN=iff-2 PE=2 SV=1;sp|P34563|IF5A1	3	1	1	5	17.867	161	5	5	213580000	688830000
G3MU81;O45624;G3MU79;N1NVB4;G3MU82;G3MU80;O45623;N1NTD2;N1NTI7;G3MU83;N1NTJ2;N1NSE3;N1NV07;N1NSD8;N1NTD8;Q7JKC3	CAEEL Ubiquitin carboxyl-terminal hydrolase	math-33	tr|G3MU81|G3MU81_CAEEL Ubiquitin carboxyl-terminal hydrolase OS=Caenorhabditis elegans OX=6239 GN=math-33 PE=1 SV=1;tr|O45624|O45624_CAEEL Ubiquitin carboxyl-terminal hydrolase OS=Caenorhabditis elegans OX=6239 GN=math-33 PE=1 SV=1;tr|G3MU79|G3MU79_CAEEL U	16	1	1	1	130.95	1129	1	1	19794000	108500000
G5ECY7;G4SJU0	CAEEL Calponin-homology (CH) domain-containing protein	CELE_T15B12.1	tr|G5ECY7|G5ECY7_CAEEL Calponin-homology (CH) domain-containing protein OS=Caenorhabditis elegans OX=6239 GN=CELE_T15B12.1 PE=1 SV=1;tr|G4SJU0|G4SJU0_CAEEL Calponin-homology (CH) domain-containing protein OS=Caenorhabditis elegans OX=6239 GN=CELE_T15B12.1	2	1	1	5.4	25.151	222	5.4	0	0	0
G5EF46;G5EBT9	CAEEL Peptidase_M28 domain-containing protein	CELE_H27A22.1	tr|G5EF46|G5EF46_CAEEL Peptidase_M28 domain-containing protein OS=Caenorhabditis elegans OX=6239 GN=CELE_H27A22.1 PE=1 SV=1;tr|G5EBT9|G5EBT9_CAEEL Peptidase_M28 domain-containing protein OS=Caenorhabditis elegans OX=6239 GN=CELE_H27A22.1 PE=1 SV=1	2	1	1	2.6	38.518	342	2.6	0	18422000	0
G5EBW5	CAEEL FErroChelatase-Like	fecl-1	tr|G5EBW5|G5EBW5_CAEEL FErroChelatase-Like OS=Caenorhabditis elegans OX=6239 GN=fecl-1 PE=1 SV=1	1	1	1	3.7	42.679	374	3.7	0	2207000	0
G5EC23	CAEEL HCF1 related	hcf-1	tr|G5EC23|G5EC23_CAEEL HCF1 related OS=Caenorhabditis elegans OX=6239 GN=hcf-1 PE=1 SV=1	1	1	1	1.4	87.358	782	1.4	0	12675000	0
G5EC71	CAEEL Glutathione S-Transferase	gst-20	tr|G5EC71|G5EC71_CAEEL Glutathione S-Transferase OS=Caenorhabditis elegans OX=6239 GN=gst-20 PE=1 SV=1	1	1	1	5.8	23.787	207	5.8	0	13747000	0
Q0MRC5;G5ECI9	CAEEL UNC-79	unc-79	tr|Q0MRC5|Q0MRC5_CAEEL UNC-79 OS=Caenorhabditis elegans OX=6239 GN=unc-79 PE=2 SV=1;tr|G5ECI9|G5ECI9_CAEEL Uncoordinated protein 79 OS=Caenorhabditis elegans OX=6239 GN=unc-79 PE=4 SV=1	2	1	1	0.7	235.14	2084	0.7	0	0	0
O45246;G5ECU5	CAEEL Heat Shock Protein	hsp-70	tr|O45246|O45246_CAEEL Heat Shock Protein OS=Caenorhabditis elegans OX=6239 GN=hsp-70 PE=1 SV=1;tr|G5ECU5|G5ECU5_CAEEL Uncharacterized protein OS=Caenorhabditis elegans OX=6239 GN=CELE_F44E5.4 PE=1 SV=1	2	2	1	4.5	70.438	643	2.5	2	13184000	0
G5ED41	CAEEL Cullin-associated NEDD8-dissociated protein 1	cand-1	sp|G5ED41|CAND1_CAEEL Cullin-associated NEDD8-dissociated protein 1 OS=Caenorhabditis elegans OX=6239 GN=cand-1 PE=1 SV=1	1	1	1	1	141.72	1274	1	0	0	0
G5EDF7	CAEEL Dual specificity mitogen-activated protein kinase kinase sek-1	sek-1	sp|G5EDF7|SEK1_CAEEL Dual specificity mitogen-activated protein kinase kinase sek-1 OS=Caenorhabditis elegans OX=6239 GN=sek-1 PE=1 SV=1	1	1	1	2.7	38.7	336	2.7	2.7	0	79845000
G5EDJ3	CAEEL Equilibrative Nucleoside Transporter	ent-1	tr|G5EDJ3|G5EDJ3_CAEEL Equilibrative Nucleoside Transporter OS=Caenorhabditis elegans OX=6239 GN=ent-1 PE=1 SV=1	1	1	1	2.5	50.029	445	2.5	0	8450800	0
G5EDP2	CAEEL Non-specific lipid-transfer protein-like 2	daf-22	sp|G5EDP2|NLTP2_CAEEL Non-specific lipid-transfer protein-like 2 OS=Caenorhabditis elegans OX=6239 GN=daf-22 PE=1 SV=1	1	1	1	2.7	44.386	412	2.7	0	1906000	0
G5EDY2	CAEEL Tryptophanyl(W) Amino-acyl tRNA Synthetase	wars-1	tr|G5EDY2|G5EDY2_CAEEL Tryptophanyl(W) Amino-acyl tRNA Synthetase OS=Caenorhabditis elegans OX=6239 GN=wars-1 PE=1 SV=1	1	1	1	1.9	47.238	417	1.9	1.9	111960000	56684000
G5EDZ2	CAEEL Uridine 5-monophosphate synthase	umps-1	sp|G5EDZ2|UMPS_CAEEL Uridine 5-monophosphate synthase OS=Caenorhabditis elegans OX=6239 GN=umps-1 PE=1 SV=1	1	1	1	2.6	54.804	497	2.6	0	3144300	0
G5EE11	CAEEL GCV_T domain-containing protein	CELE_F39H2.3	tr|G5EE11|G5EE11_CAEEL GCV_T domain-containing protein OS=Caenorhabditis elegans OX=6239 GN=CELE_F39H2.3 PE=1 SV=1	1	1	1	5	31.355	280	5	0	1786200	0
G5EE42	CAEEL N-acetyltransferase domain-containing protein	CELE_ZK1098.11	tr|G5EE42|G5EE42_CAEEL N-acetyltransferase domain-containing protein OS=Caenorhabditis elegans OX=6239 GN=CELE_ZK1098.11 PE=1 SV=1	1	1	1	12	11.561	100	12	0	11024000	0
G5EED5	CAEEL Secretory carrier-associated membrane protein	scm-1	tr|G5EED5|G5EED5_CAEEL Secretory carrier-associated membrane protein OS=Caenorhabditis elegans OX=6239 GN=scm-1 PE=1 SV=1	1	1	1	6	36.859	335	6	0	19906000	0
G5EEI4	CAEEL Aspartic protease 1	asp-1	sp|G5EEI4|ASP1_CAEEL Aspartic protease 1 OS=Caenorhabditis elegans OX=6239 GN=asp-1 PE=1 SV=1	1	1	1	3.5	42.692	396	3.5	0	6488600	0
G5EET8	CAEEL PUD1_2 domain-containing protein	pud-1.2	tr|G5EET8|G5EET8_CAEEL PUD1_2 domain-containing protein OS=Caenorhabditis elegans OX=6239 GN=pud-1.2 PE=1 SV=1	1	1	1	7.3	17.184	151	7.3	7.3	10882000	14117000
G5EF37	CAEEL Paralysed Arrest at Two-fold	pat-10	tr|G5EF37|G5EF37_CAEEL Paralysed Arrest at Two-fold OS=Caenorhabditis elegans OX=6239 GN=pat-10 PE=1 SV=1	1	1	1	13	18.516	161	13	0	5486400	0
I7F493;G5EFC1	CAEEL Rab-8 (Fragment)	rab-8	tr|I7F493|I7F493_CAEEL Rab-8 (Fragment) OS=Caenorhabditis elegans OX=6239 GN=rab-8 PE=2 SV=1;tr|G5EFC1|G5EFC1_CAEEL RAB family OS=Caenorhabditis elegans OX=6239 GN=rab-8 PE=1 SV=1	2	1	1	4.8	23.891	210	4.8	4.8	18756000	33638000
Q17340;G5EFG4	CAEEL ABC transporter domain-containing protein (Fragment)		tr|Q17340|Q17340_CAEEL ABC transporter domain-containing protein (Fragment) OS=Caenorhabditis elegans OX=6239 PE=2 SV=1;tr|G5EFG4|G5EFG4_CAEEL ABC transporter, class F OS=Caenorhabditis elegans OX=6239 GN=abcf-2 PE=1 SV=1	2	1	1	2.1	61.085	535	2.1	0	120400000	0
G5EGJ4;G5EG90	CAEEL F-box C protein	fbxc-5	tr|G5EGJ4|G5EGJ4_CAEEL F-box C protein OS=Caenorhabditis elegans OX=6239 GN=fbxc-5 PE=4 SV=1;tr|G5EG90|G5EG90_CAEEL F-box C protein OS=Caenorhabditis elegans OX=6239 GN=fbxc-2 PE=4 SV=1	2	1	1	2.7	43.754	375	2.7	0	0	0
G5EGK8	CAEEL Serine/threonine-protein phosphatase 2A catalytic subunit	let-92	sp|G5EGK8|PP2A_CAEEL Serine/threonine-protein phosphatase 2A catalytic subunit OS=Caenorhabditis elegans OX=6239 GN=let-92 PE=1 SV=1	1	1	1	3.8	36.302	318	3.8	3.8	10473000	8766400
G8JY43;P46550	CAEEL T-complex protein 1 subunit zeta	cct-6	tr|G8JY43|G8JY43_CAEEL T-complex protein 1 subunit zeta OS=Caenorhabditis elegans OX=6239 GN=cct-6 PE=1 SV=1;sp|P46550|TCPZ_CAEEL T-complex protein 1 subunit zeta OS=Caenorhabditis elegans OX=6239 GN=cct-6 PE=1 SV=1	2	1	1	2.1	47.67	429	2.1	2.1	43295000	65897000
H2L001;Q2L6Y6	CAEEL HATPase_c domain-containing protein	hsp-75	tr|H2L001|H2L001_CAEEL HATPase_c domain-containing protein OS=Caenorhabditis elegans OX=6239 GN=hsp-75 PE=1 SV=1;tr|Q2L6Y6|Q2L6Y6_CAEEL HATPase_c domain-containing protein OS=Caenorhabditis elegans OX=6239 GN=hsp-75 PE=1 SV=1	2	1	1	2.5	54.273	479	2.5	0	0	0
H2L023;Q95YA9	CAEEL Adenylyl cyclase-associated protein	cas-1	tr|H2L023|H2L023_CAEEL Adenylyl cyclase-associated protein OS=Caenorhabditis elegans OX=6239 GN=cas-1 PE=1 SV=1;tr|Q95YA9|Q95YA9_CAEEL Adenylyl cyclase-associated protein OS=Caenorhabditis elegans OX=6239 GN=cas-1 PE=1 SV=2	2	1	1	2	53.017	495	2	0	4198700	0
Q9GZI3;H2L0M0	CAEEL Uncharacterized protein	pod-2	tr|Q9GZI3|Q9GZI3_CAEEL Uncharacterized protein OS=Caenorhabditis elegans OX=6239 GN=pod-2 PE=1 SV=1;tr|H2L0M0|H2L0M0_CAEEL Uncharacterized protein OS=Caenorhabditis elegans OX=6239 GN=pod-2 PE=1 SV=1	2	1	1	0.5	230.57	2054	0.5	0.5	24393000	6627000
Q17409;O18688;H2L2E8;P34690	CAEEL Tubulin alpha chain	tba-1	tr|Q17409|Q17409_CAEEL Tubulin alpha chain OS=Caenorhabditis elegans OX=6239 GN=tba-1 PE=3 SV=1;tr|O18688|O18688_CAEEL Tubulin alpha chain OS=Caenorhabditis elegans OX=6239 GN=tba-1 PE=1 SV=1;tr|H2L2E8|H2L2E8_CAEEL Tubulin alpha chain OS=Caenorhabditis ele	4	3	1	6	50.025	449	6	2	414840000	389550000
V6CJV7;L8E6W1;Q9BMN8	CAEEL Protein-tyrosine-phosphatase	ptp-3	tr|V6CJV7|V6CJV7_CAEEL Protein-tyrosine-phosphatase OS=Caenorhabditis elegans OX=6239 GN=ptp-3 PE=1 SV=1;tr|L8E6W1|L8E6W1_CAEEL Protein-tyrosine-phosphatase OS=Caenorhabditis elegans OX=6239 GN=ptp-3 PE=1 SV=1;sp|Q9BMN8|LAR_CAEEL Tyrosine-protein phosphata	3	1	1	0.6	246.62	2200	0.6	0	4085500	0
N1NVC4;Q21217	CAEEL Probable 4-aminobutyrate aminotransferase, mitochondrial	gta-1	tr|N1NVC4|N1NVC4_CAEEL Probable 4-aminobutyrate aminotransferase, mitochondrial OS=Caenorhabditis elegans OX=6239 GN=gta-1 PE=1 SV=1;sp|Q21217|GABT_CAEEL Probable 4-aminobutyrate aminotransferase, mitochondrial OS=Caenorhabditis elegans OX=6239 GN=gta-1 PE	2	1	1	3.2	37.709	339	3.2	0	14703000	0
O01504	CAEEL 60S acidic ribosomal protein P2	C37A2.7	sp|O01504|RLA2_CAEEL 60S acidic ribosomal protein P2 OS=Caenorhabditis elegans OX=6239 GN=C37A2.7 PE=3 SV=2	1	1	1	21.5	10.813	107	21.5	0	52623000	0
O01542	CAEEL Calponin-homology (CH) domain-containing protein	cpn-3	tr|O01542|O01542_CAEEL Calponin-homology (CH) domain-containing protein OS=Caenorhabditis elegans OX=6239 GN=cpn-3 PE=1 SV=1	1	1	1	8.5	15.509	142	8.5	0	58457000	0
O01692	CAEEL 40S ribosomal protein S17	rps-17	sp|O01692|RS17_CAEEL 40S ribosomal protein S17 OS=Caenorhabditis elegans OX=6239 GN=rps-17 PE=3 SV=2	1	1	1	7.7	14.938	130	7.7	0	9587400	0
O01733	CAEEL Protein kinase domain-containing protein	C09D4.3	tr|O01733|O01733_CAEEL Protein kinase domain-containing protein OS=Caenorhabditis elegans OX=6239 GN=C09D4.3 PE=4 SV=2	1	1	1	4.2	47.002	406	4.2	0	46425000	0
O45518;O45011;O01854	CAEEL ARGinine Kinase	argk-1	tr|O45518|O45518_CAEEL ARGinine Kinase OS=Caenorhabditis elegans OX=6239 GN=argk-1 PE=1 SV=1;tr|O45011|O45011_CAEEL Uncharacterized protein OS=Caenorhabditis elegans OX=6239 GN=CELE_W10C8.5 PE=1 SV=1;tr|O01854|O01854_CAEEL Uncharacterized protein OS=Caenor	3	1	1	2.7	42.145	372	2.7	0	23219000	0
O01869	CAEEL S10_plectin domain-containing protein	rps-10	tr|O01869|O01869_CAEEL S10_plectin domain-containing protein OS=Caenorhabditis elegans OX=6239 GN=rps-10 PE=1 SV=1	1	1	1	8.7	16.87	149	8.7	0	10903000	0
O02056	CAEEL 60S ribosomal protein L4	rpl-4	sp|O02056|RL4_CAEEL 60S ribosomal protein L4 OS=Caenorhabditis elegans OX=6239 GN=rpl-4 PE=1 SV=3	1	1	1	2.6	38.659	345	2.6	0	11254000	0
O02082	CAEEL Uncharacterized protein	C48E7.1	tr|O02082|O02082_CAEEL Uncharacterized protein OS=Caenorhabditis elegans OX=6239 GN=C48E7.1 PE=1 SV=1	1	1	1	6.3	18.676	174	6.3	0	10867000	0
O02328	CAEEL Eukaryotic translation initiation factor 3 subunit C	eif-3.C	sp|O02328|EIF3C_CAEEL Eukaryotic translation initiation factor 3 subunit C OS=Caenorhabditis elegans OX=6239 GN=eif-3.C PE=3 SV=2	1	1	1	0.9	103.84	898	0.9	0	5334300	0
O02485	CAEEL Uncharacterized protein ZK1073.1	ZK1073.1	sp|O02485|YDJ1_CAEEL Uncharacterized protein ZK1073.1 OS=Caenorhabditis elegans OX=6239 GN=ZK1073.1 PE=3 SV=1	1	1	1	3.1	35.591	325	3.1	0	7882700	0
O02640	CAEEL Probable malate dehydrogenase, mitochondrial	mdh-2	sp|O02640|MDHM_CAEEL Probable malate dehydrogenase, mitochondrial OS=Caenorhabditis elegans OX=6239 GN=mdh-2 PE=3 SV=1	1	1	1	3.5	35.119	341	3.5	0	22694000	0
O16336	CAEEL Seven TM Receptor	str-130	tr|O16336|O16336_CAEEL Seven TM Receptor OS=Caenorhabditis elegans OX=6239 GN=str-130 PE=4 SV=1	1	1	1	3.6	38.543	338	3.6	0	11026000	0
O16517	CAEEL ATP synthase subunit	atp-4	tr|O16517|O16517_CAEEL ATP synthase subunit OS=Caenorhabditis elegans OX=6239 GN=atp-4 PE=1 SV=1	1	1	1	10.1	13.957	129	10.1	0	29280000	0
O17287	CAEEL Mitochondrial import receptor subunit TOM22 homolog	tomm-22	sp|O17287|TOM22_CAEEL Mitochondrial import receptor subunit TOM22 homolog OS=Caenorhabditis elegans OX=6239 GN=tomm-22 PE=3 SV=1	1	1	1	6.4	12.176	109	6.4	0	26173000	0
O17687	CAEEL SHNi-TPR domain-containing protein	nasp-2	tr|O17687|O17687_CAEEL SHNi-TPR domain-containing protein OS=Caenorhabditis elegans OX=6239 GN=nasp-2 PE=1 SV=1	1	1	1	1.7	62.957	582	1.7	0	4394700	0
O17732	CAEEL Pyruvate carboxylase 1	pyc-1	sp|O17732|PYC1_CAEEL Pyruvate carboxylase 1 OS=Caenorhabditis elegans OX=6239 GN=pyc-1 PE=1 SV=1	1	1	1	0.6	129.28	1175	0.6	0	10879000	0
O17915	CAEEL GTP-binding nuclear protein ran-1	ran-1	sp|O17915|RAN_CAEEL GTP-binding nuclear protein ran-1 OS=Caenorhabditis elegans OX=6239 GN=ran-1 PE=1 SV=1	1	1	1	5.1	24.254	215	5.1	0	6941500	0
O17921;Q18817;P12456	CAEEL Tubulin beta chain	tbb-1	tr|O17921|O17921_CAEEL Tubulin beta chain OS=Caenorhabditis elegans OX=6239 GN=tbb-1 PE=1 SV=1;tr|Q18817|Q18817_CAEEL Tubulin beta chain OS=Caenorhabditis elegans OX=6239 GN=ben-1 PE=1 SV=3;sp|P12456|TBB1_CAEEL Tubulin beta-1 chain OS=Caenorhabditis elegan	3	3	1	6.7	50.238	449	6.7	2	5253800	0
O17953	CAEEL Dihydrolipoyl dehydrogenase, mitochondrial	dld-1	sp|O17953|DLDH_CAEEL Dihydrolipoyl dehydrogenase, mitochondrial OS=Caenorhabditis elegans OX=6239 GN=dld-1 PE=3 SV=2	1	1	1	2	52.633	495	2	0	4312800	0
O18240	CAEEL Ribosomal Protein, Small subunit	rps-18	tr|O18240|O18240_CAEEL Ribosomal Protein, Small subunit OS=Caenorhabditis elegans OX=6239 GN=rps-18 PE=1 SV=1	1	1	1	4.5	17.77	154	4.5	0	5227400	0
O44441	CAEEL ATPase inhibitor mai-2, mitochondrial	mai-2	sp|O44441|ATIF2_CAEEL ATPase inhibitor mai-2, mitochondrial OS=Caenorhabditis elegans OX=6239 GN=mai-2 PE=3 SV=1	1	1	1	8.3	12.031	109	8.3	0	23372000	0
O44657	CAEEL CYtochrome P450 family	cyp-34a7	tr|O44657|O44657_CAEEL CYtochrome P450 family OS=Caenorhabditis elegans OX=6239 GN=cyp-34a7 PE=3 SV=1	1	1	1	2.8	56.618	499	2.8	0	4309100	0
O44782	CAEEL Major sperm protein	vpr-1	tr|O44782|O44782_CAEEL Major sperm protein OS=Caenorhabditis elegans OX=6239 GN=vpr-1 PE=1 SV=1	1	1	1	3.7	26.851	245	3.7	3.7	5625800	13393000
O44827	CAEEL Facilitated glucose transporter protein 1	fgt-1	sp|O44827|FGT1_CAEEL Facilitated glucose transporter protein 1 OS=Caenorhabditis elegans OX=6239 GN=fgt-1 PE=1 SV=2	1	1	1	1.8	55.068	510	1.8	0	29520000	0
O45552	CAEEL ACetyl-CoA Acyltransferase 2 homolog	acaa-2	tr|O45552|O45552_CAEEL ACetyl-CoA Acyltransferase 2 homolog OS=Caenorhabditis elegans OX=6239 GN=acaa-2 PE=1 SV=2	1	1	1	2.3	41.29	394	2.3	0	17718000	0
O45574;Q95ZS5	CAEEL Uncharacterized protein	CELE_F56A8.3	tr|O45574|O45574_CAEEL Uncharacterized protein OS=Caenorhabditis elegans OX=6239 GN=CELE_F56A8.3 PE=1 SV=1;tr|Q95ZS5|Q95ZS5_CAEEL Uncharacterized protein OS=Caenorhabditis elegans OX=6239 GN=CELE_F56A8.3 PE=1 SV=1	2	1	1	3.5	28.123	254	3.5	0	9721900	0
O45729	CAEEL Serpentine Receptor, class U	sru-15	tr|O45729|O45729_CAEEL Serpentine Receptor, class U OS=Caenorhabditis elegans OX=6239 GN=sru-15 PE=4 SV=1	1	1	1	4.3	37.892	322	4.3	0	0	0
O45815	CAEEL ACTin	act-5	tr|O45815|O45815_CAEEL ACTin OS=Caenorhabditis elegans OX=6239 GN=act-5 PE=1 SV=1	1	3	1	8.3	41.872	375	8.3	5.6	6381900	0
O45904;P36573	CAEEL Galectin	lec-1	tr|O45904|O45904_CAEEL Galectin OS=Caenorhabditis elegans OX=6239 GN=lec-1 PE=1 SV=1;sp|P36573|LEC1_CAEEL 32 kDa beta-galactoside-binding lectin OS=Caenorhabditis elegans OX=6239 GN=lec-1 PE=1 SV=1	2	1	1	3.2	32.683	285	3.2	3.2	56958000	62562000
O45933	CAEEL Nucleoporin SEH1	npp-18	sp|O45933|SEH1_CAEEL Nucleoporin SEH1 OS=Caenorhabditis elegans OX=6239 GN=npp-18 PE=3 SV=1	1	1	1	1.9	41.725	363	1.9	0	8793900	0
Q9U3R0;O45941	CAEEL UPF0375 protein C08F11.12	C08F11.12	sp|Q9U3R0|U375B_CAEEL UPF0375 protein C08F11.12 OS=Caenorhabditis elegans OX=6239 GN=C08F11.12 PE=3 SV=1;sp|O45941|U375E_CAEEL UPF0375 protein Y45F10C.2 OS=Caenorhabditis elegans OX=6239 GN=Y45F10C.2 PE=1 SV=1	2	1	1	14.5	12.825	117	14.5	0	23980000	0
O45971;O45972	CAEEL Uncharacterized protein	CELE_Y6E2A.1	tr|O45971|O45971_CAEEL Uncharacterized protein OS=Caenorhabditis elegans OX=6239 GN=CELE_Y6E2A.1 PE=4 SV=1;tr|O45972|O45972_CAEEL Seven TM Receptor OS=Caenorhabditis elegans OX=6239 GN=str-101 PE=4 SV=3	2	1	1	3.3	35.652	307	3.3	3.3	4986200000	25576000
O61521	CAEEL Uncharacterized protein	CELE_F17E9.5	tr|O61521|O61521_CAEEL Uncharacterized protein OS=Caenorhabditis elegans OX=6239 GN=CELE_F17E9.5 PE=1 SV=2	1	1	1	6.2	17.149	162	6.2	0	11208000	0
O61709	CAEEL Uncharacterized protein	CELE_R119.3	tr|O61709|O61709_CAEEL Uncharacterized protein OS=Caenorhabditis elegans OX=6239 GN=CELE_R119.3 PE=1 SV=2	1	1	1	5.1	26.539	253	5.1	0	13904000	0
U4PB05;O62327	CAEEL Glutathione peroxidase	gpx-2	tr|U4PB05|U4PB05_CAEEL Glutathione peroxidase OS=Caenorhabditis elegans OX=6239 GN=gpx-2 PE=1 SV=1;sp|O62327|GPX2_CAEEL Glutathione peroxidase 2 OS=Caenorhabditis elegans OX=6239 GN=gpx-2 PE=3 SV=1	2	1	1	8.4	19.816	179	8.4	0	5173600	0
O62431	CAEEL Probable glutamine--tRNA ligase	qars-1	sp|O62431|SYQ_CAEEL Probable glutamine--tRNA ligase OS=Caenorhabditis elegans OX=6239 GN=qars-1 PE=3 SV=1	1	1	1	1.5	88.261	786	1.5	0	0	0
O76715	CAEEL Uncharacterized protein	CELE_F36H12.5	tr|O76715|O76715_CAEEL Uncharacterized protein OS=Caenorhabditis elegans OX=6239 GN=CELE_F36H12.5 PE=1 SV=1	1	1	1	12.7	22.335	197	12.7	12.7	21964000	3527500
P02567	CAEEL Myosin-1	myo-1	sp|P02567|MYO1_CAEEL Myosin-1 OS=Caenorhabditis elegans OX=6239 GN=myo-1 PE=1 SV=3	1	1	1	0.6	223.32	1938	0.6	0	2579700	0
P06125	CAEEL Vitellogenin-5	vit-5	sp|P06125|VIT5_CAEEL Vitellogenin-5 OS=Caenorhabditis elegans OX=6239 GN=vit-5 PE=2 SV=2	1	13	1	7.2	186.44	1603	7.2	2.1	1068400000	1146400000
P10567	CAEEL Paramyosin	unc-15	sp|P10567|MYSP_CAEEL Paramyosin OS=Caenorhabditis elegans OX=6239 GN=unc-15 PE=1 SV=2	1	1	1	1.3	100.63	872	1.3	0	3749100	0
P11141	CAEEL Heat shock 70 kDa protein F, mitochondrial	hsp-6	sp|P11141|HSP7F_CAEEL Heat shock 70 kDa protein F, mitochondrial OS=Caenorhabditis elegans OX=6239 GN=hsp-6 PE=1 SV=2	1	1	1	1.8	70.844	657	1.8	0	24448000	0
P19626;P19625	CAEEL Myosin regulatory light chain 2	mlc-2	sp|P19626|MLR2_CAEEL Myosin regulatory light chain 2 OS=Caenorhabditis elegans OX=6239 GN=mlc-2 PE=4 SV=1;sp|P19625|MLR1_CAEEL Myosin regulatory light chain 1 OS=Caenorhabditis elegans OX=6239 GN=mlc-1 PE=4 SV=1	2	1	1	6.5	18.603	170	6.5	0	25179000	0
P19826	CAEEL Vinculin	deb-1	sp|P19826|VINC_CAEEL Vinculin OS=Caenorhabditis elegans OX=6239 GN=deb-1 PE=1 SV=2	1	1	1	0.7	120.78	1090	0.7	0.7	0	90303000
P27798	CAEEL Calreticulin	crt-1	sp|P27798|CALR_CAEEL Calreticulin OS=Caenorhabditis elegans OX=6239 GN=crt-1 PE=1 SV=1	1	1	1	2.8	45.616	395	2.8	2.8	0	28934000
P34303	CAEEL Zinc finger transcription factor family protein 30	ztf-30	sp|P34303|ZTF30_CAEEL Zinc finger transcription factor family protein 30 OS=Caenorhabditis elegans OX=6239 GN=ztf-30 PE=4 SV=1	1	1	1	2.8	44.476	397	2.8	0	0	0
P34308	CAEEL Calpain clp-1	clp-1	sp|P34308|CAN_CAEEL Calpain clp-1 OS=Caenorhabditis elegans OX=6239 GN=clp-1 PE=2 SV=4	1	1	1	1.7	83.642	780	1.7	0	21530000	0
P34331	CAEEL Serine/threonine-protein kinase plk-1	plk-1	sp|P34331|PLK1_CAEEL Serine/threonine-protein kinase plk-1 OS=Caenorhabditis elegans OX=6239 GN=plk-1 PE=1 SV=3	1	1	1	1.7	73.633	649	1.7	0	18621000	0
P34455	CAEEL Probable aconitate hydratase, mitochondrial	aco-2	sp|P34455|ACON_CAEEL Probable aconitate hydratase, mitochondrial OS=Caenorhabditis elegans OX=6239 GN=aco-2 PE=3 SV=2	1	1	1	1.9	84.046	777	1.9	0	8813000	0
P34500	CAEEL Transthyretin-like protein 2	ttr-2	sp|P34500|TTR2_CAEEL Transthyretin-like protein 2 OS=Caenorhabditis elegans OX=6239 GN=ttr-2 PE=1 SV=1	1	1	1	6.8	15.703	148	6.8	6.8	16861000	29486000
P34556	CAEEL Cyclin-dependent kinase 1	cdk-1	sp|P34556|CDK1_CAEEL Cyclin-dependent kinase 1 OS=Caenorhabditis elegans OX=6239 GN=cdk-1 PE=1 SV=1	1	1	1	4.2	38.295	332	4.2	0	2046000	0
P34575	CAEEL Probable citrate synthase, mitochondrial	cts-1	sp|P34575|CISY_CAEEL Probable citrate synthase, mitochondrial OS=Caenorhabditis elegans OX=6239 GN=cts-1 PE=3 SV=1	1	1	1	2.4	51.54	468	2.4	0	6113500	0
P34604	CAEEL Probable translation initiation factor eIF-2B subunit alpha	ZK1098.4	sp|P34604|EI2BA_CAEEL Probable translation initiation factor eIF-2B subunit alpha OS=Caenorhabditis elegans OX=6239 GN=ZK1098.4 PE=1 SV=1	1	1	1	3	34.117	305	3	0	6970500	0
P35129	CAEEL Ubiquitin-conjugating enzyme E2 2	let-70	sp|P35129|UBC2_CAEEL Ubiquitin-conjugating enzyme E2 2 OS=Caenorhabditis elegans OX=6239 GN=let-70 PE=1 SV=1	1	1	1	4.8	16.705	147	4.8	0	19595000	0
P36609	CAEEL Neuronal calcium sensor 2	ncs-2	sp|P36609|NCS2_CAEEL Neuronal calcium sensor 2 OS=Caenorhabditis elegans OX=6239 GN=ncs-2 PE=2 SV=2	1	1	1	5.3	21.985	190	5.3	0	11062000	0
Q9U9I9;P39055	CAEEL Dynamin	dyn-1	tr|Q9U9I9|Q9U9I9_CAEEL Dynamin OS=Caenorhabditis elegans OX=6239 GN=dyn-1 PE=1 SV=1;sp|P39055|DYN1_CAEEL Dynamin OS=Caenorhabditis elegans OX=6239 GN=dyn-1 PE=1 SV=3	2	1	1	1.4	94.361	838	1.4	0	5920200	0
P41847	CAEEL Anamorsin homolog	T20B12.7	sp|P41847|DRE2_CAEEL Anamorsin homolog OS=Caenorhabditis elegans OX=6239 GN=T20B12.7 PE=3 SV=1	1	1	1	3.8	25.551	238	3.8	3.8	0	8670400
P41937;P52275	CAEEL Tubulin beta-4 chain	tbb-4	sp|P41937|TBB4_CAEEL Tubulin beta-4 chain OS=Caenorhabditis elegans OX=6239 GN=tbb-4 PE=3 SV=1;sp|P52275|TBB2_CAEEL Tubulin beta-2 chain OS=Caenorhabditis elegans OX=6239 GN=tbb-2 PE=1 SV=1	2	3	1	6.8	49.8	444	6.8	2	49682000	60336000
P41988	CAEEL T-complex protein 1 subunit alpha	cct-1	sp|P41988|TCPA_CAEEL T-complex protein 1 subunit alpha OS=Caenorhabditis elegans OX=6239 GN=cct-1 PE=3 SV=2	1	1	1	2.4	58.802	549	2.4	0	5147800	0
Q95ZN7;P46548	CAEEL Glycylpeptide N-tetradecanoyltransferase	nmt-1	tr|Q95ZN7|Q95ZN7_CAEEL Glycylpeptide N-tetradecanoyltransferase OS=Caenorhabditis elegans OX=6239 GN=nmt-1 PE=1 SV=1;sp|P46548|NMT_CAEEL Probable glycylpeptide N-tetradecanoyltransferase OS=Caenorhabditis elegans OX=6239 GN=nmt-1 PE=3 SV=1	2	1	1	1.8	51.164	452	1.8	0	29220000	0
P46561	CAEEL ATP synthase subunit beta, mitochondrial	atp-2	sp|P46561|ATPB_CAEEL ATP synthase subunit beta, mitochondrial OS=Caenorhabditis elegans OX=6239 GN=atp-2 PE=1 SV=2	1	1	1	1.9	57.526	538	1.9	0	3217600	0
P46562	CAEEL Putative aldehyde dehydrogenase family 7 member A1 homolog	alh-9	sp|P46562|AL7A1_CAEEL Putative aldehyde dehydrogenase family 7 member A1 homolog OS=Caenorhabditis elegans OX=6239 GN=alh-9 PE=3 SV=2	1	1	1	1.5	57.012	531	1.5	0	9590900	0
P47208	CAEEL T-complex protein 1 subunit delta	cct-4	sp|P47208|TCPD_CAEEL T-complex protein 1 subunit delta OS=Caenorhabditis elegans OX=6239 GN=cct-4 PE=2 SV=1	1	1	1	2.4	58.391	540	2.4	0	6399300	0
P47209	CAEEL T-complex protein 1 subunit epsilon	cct-5	sp|P47209|TCPE_CAEEL T-complex protein 1 subunit epsilon OS=Caenorhabditis elegans OX=6239 GN=cct-5 PE=2 SV=1	1	1	1	2.2	59.406	542	2.2	0	21843000	0
P48150	CAEEL 40S ribosomal protein S14	rps-14	sp|P48150|RS14_CAEEL 40S ribosomal protein S14 OS=Caenorhabditis elegans OX=6239 GN=rps-14 PE=3 SV=1	1	1	1	7.2	16.249	152	7.2	0	130920000	0
P48154	CAEEL 40S ribosomal protein S3a	rps-1	sp|P48154|RS3A_CAEEL 40S ribosomal protein S3a OS=Caenorhabditis elegans OX=6239 GN=rps-1 PE=3 SV=2	1	1	1	3.5	28.96	257	3.5	0	21366000	0
P48158	CAEEL 60S ribosomal protein L23	rpl-23	sp|P48158|RL23_CAEEL 60S ribosomal protein L23 OS=Caenorhabditis elegans OX=6239 GN=rpl-23 PE=3 SV=1	1	1	1	7.1	14.954	140	7.1	7.1	0	9755500
P48727	CAEEL Serine/threonine-protein phosphatase PP1-beta	gsp-2	sp|P48727|GLC7B_CAEEL Serine/threonine-protein phosphatase PP1-beta OS=Caenorhabditis elegans OX=6239 GN=gsp-2 PE=1 SV=1	1	1	1	3	37.791	333	3	0	9183200	0
P49595	CAEEL Protein phosphatase ppm-1.G	ppm-1.G	sp|P49595|PPM1G_CAEEL Protein phosphatase ppm-1.G OS=Caenorhabditis elegans OX=6239 GN=ppm-1.G PE=3 SV=2	1	1	1	2	53.141	491	2	0	7942900	0
P52015	CAEEL Peptidyl-prolyl cis-trans isomerase 7	cyn-7	sp|P52015|CYP7_CAEEL Peptidyl-prolyl cis-trans isomerase 7 OS=Caenorhabditis elegans OX=6239 GN=cyn-7 PE=1 SV=2	1	1	1	7	18.401	171	7	7	17111000	70854000
Q86D21;P52709	CAEEL AA_TRNA_LIGASE_II domain-containing protein	tars-1	tr|Q86D21|Q86D21_CAEEL AA_TRNA_LIGASE_II domain-containing protein OS=Caenorhabditis elegans OX=6239 GN=tars-1 PE=1 SV=1;sp|P52709|SYTC_CAEEL Threonine--tRNA ligase, cytoplasmic OS=Caenorhabditis elegans OX=6239 GN=tars-1 PE=3 SV=1	2	1	1	1.2	79.463	684	1.2	1.2	36572000	44473000
P52819	CAEEL 60S ribosomal protein L22	rpl-22	sp|P52819|RL22_CAEEL 60S ribosomal protein L22 OS=Caenorhabditis elegans OX=6239 GN=rpl-22 PE=1 SV=3	1	1	1	7.7	14.946	130	7.7	0	46397000	0
P52872	CAEEL Dolichyl-diphosphooligosaccharide--protein glycosyltransferase subunit dad-1	dad-1	sp|P52872|DAD1_CAEEL Dolichyl-diphosphooligosaccharide--protein glycosyltransferase subunit dad-1 OS=Caenorhabditis elegans OX=6239 GN=dad-1 PE=3 SV=1	1	1	1	8.8	12.747	113	8.8	0	1645400	0
Q95XU7;Q9TVW5;Q94053;Q21244;Q19832;Q18461;Q17856;P53020;P53019;P53017	CAEEL Major sperm protein	CELE_Y59H11AM.1	tr|Q95XU7|Q95XU7_CAEEL Major sperm protein OS=Caenorhabditis elegans OX=6239 GN=CELE_Y59H11AM.1 PE=1 SV=1;sp|Q9TVW5|MSP77_CAEEL Major sperm protein 77/79 OS=Caenorhabditis elegans OX=6239 GN=msp-77 PE=2 SV=3;sp|Q94053|MSP78_CAEEL Major sperm protein 78 OS=	10	1	1	12.6	14.195	127	12.6	0	0	0
P53588	CAEEL Succinate--CoA ligase [ADP-forming] subunit beta, mitochondrial	suca-1	sp|P53588|SUCB1_CAEEL Succinate--CoA ligase [ADP-forming] subunit beta, mitochondrial OS=Caenorhabditis elegans OX=6239 GN=suca-1 PE=3 SV=1	1	1	1	2.3	47.419	435	2.3	0	2758400	0
P54811	CAEEL Transitional endoplasmic reticulum ATPase homolog 1	cdc-48.1	sp|P54811|TERA1_CAEEL Transitional endoplasmic reticulum ATPase homolog 1 OS=Caenorhabditis elegans OX=6239 GN=cdc-48.1 PE=1 SV=1	1	1	1	1.2	89.784	809	1.2	0	22603000	0
P83387;Q5R3Y2;P83386	CAEEL MARVEL domain-containing protein	CELE_F47B3.3	tr|P83387|P83387_CAEEL MARVEL domain-containing protein OS=Caenorhabditis elegans OX=6239 GN=CELE_F47B3.3 PE=4 SV=1;tr|Q5R3Y2|Q5R3Y2_CAEEL MARVEL domain-containing protein OS=Caenorhabditis elegans OX=6239 GN=CELE_F28H1.4 PE=1 SV=1;tr|P83386|P83386_CAEEL M	3	1	1	9.6	17.617	156	9.6	0	6120400	0
P90780;P90778	CAEEL SKN-1 Dependent Zygotic transcript	sdz-8	tr|P90780|P90780_CAEEL SKN-1 Dependent Zygotic transcript OS=Caenorhabditis elegans OX=6239 GN=sdz-8 PE=1 SV=1;tr|P90778|P90778_CAEEL Uncharacterized protein OS=Caenorhabditis elegans OX=6239 GN=C55A6.3 PE=1 SV=3	2	1	1	4.8	26.702	250	4.8	0	16945000	0
P90961	CAEEL Clathrin light chain	clic-1	tr|P90961|P90961_CAEEL Clathrin light chain OS=Caenorhabditis elegans OX=6239 GN=clic-1 PE=1 SV=1	1	1	1	3.5	24.443	226	3.5	0	7509200	0
P91001	CAEEL COP9 signalosome complex subunit 5	csn-5	sp|P91001|CSN5_CAEEL COP9 signalosome complex subunit 5 OS=Caenorhabditis elegans OX=6239 GN=csn-5 PE=1 SV=1	1	1	1	4.1	41.008	368	4.1	0	0	0
P91250	CAEEL Col_cuticle_N domain-containing protein	col-73	tr|P91250|P91250_CAEEL Col_cuticle_N domain-containing protein OS=Caenorhabditis elegans OX=6239 GN=col-73 PE=1 SV=1	1	1	1	2.8	28.263	285	2.8	0	23383000	0
P91254;P91253	CAEEL Probable glutathione S-transferase 8	gst-8	sp|P91254|GST8_CAEEL Probable glutathione S-transferase 8 OS=Caenorhabditis elegans OX=6239 GN=gst-8 PE=3 SV=1;sp|P91253|GST7_CAEEL Probable glutathione S-transferase 7 OS=Caenorhabditis elegans OX=6239 GN=gst-7 PE=3 SV=1	2	1	1	3.9	23.432	206	3.9	0	115140000	0
P91284;Q6BEW1	CAEEL Uncharacterized protein	CELE_F27C1.2	tr|P91284|P91284_CAEEL Uncharacterized protein OS=Caenorhabditis elegans OX=6239 GN=CELE_F27C1.2 PE=1 SV=1;tr|Q6BEW1|Q6BEW1_CAEEL Uncharacterized protein OS=Caenorhabditis elegans OX=6239 GN=CELE_F27C1.2 PE=1 SV=1	2	1	1	4.4	27.816	252	4.4	0	0	0
P91372	CAEEL Uncharacterized protein	CELE_K11H12.7	tr|P91372|P91372_CAEEL Uncharacterized protein OS=Caenorhabditis elegans OX=6239 GN=CELE_K11H12.7 PE=1 SV=1	1	1	1	8.7	14.141	127	8.7	0	3328500	0
P91844	CAEEL Microfilaria Surface-Associated protein	msa-1	tr|P91844|P91844_CAEEL Microfilaria Surface-Associated protein OS=Caenorhabditis elegans OX=6239 GN=msa-1 PE=1 SV=1	1	1	1	6.3	19.215	174	6.3	0	12298000	0
P91871	CAEEL Carrier domain-containing protein	fasn-1	tr|P91871|P91871_CAEEL Carrier domain-containing protein OS=Caenorhabditis elegans OX=6239 GN=fasn-1 PE=1 SV=2	1	1	1	0.5	289.22	2613	0.5	0	8274200	0
P91913	CAEEL 60S acidic ribosomal protein P1	rla-1	sp|P91913|RLA1_CAEEL 60S acidic ribosomal protein P1 OS=Caenorhabditis elegans OX=6239 GN=rla-1 PE=3 SV=2	1	1	1	31.5	11.284	111	31.5	0	11728000	0
Q03561	CAEEL Neuropeptide-like peptide 36	nlp-36	sp|Q03561|NLP36_CAEEL Neuropeptide-like peptide 36 OS=Caenorhabditis elegans OX=6239 GN=nlp-36 PE=1 SV=1	1	1	1	12.2	9.427	82	12.2	0	6363700	0
Q03567	CAEEL Uncharacterized transporter slc-17.2	C38C10.2	sp|Q03567|SL172_CAEEL Uncharacterized transporter slc-17.2 OS=Caenorhabditis elegans OX=6239 GN=C38C10.2 PE=1 SV=2	1	1	1	1.8	52.737	493	1.8	0	41308000	0
Q03577	CAEEL Aspartate--tRNA ligase, cytoplasmic	dars-1	sp|Q03577|SYDC_CAEEL Aspartate--tRNA ligase, cytoplasmic OS=Caenorhabditis elegans OX=6239 GN=dars-1 PE=3 SV=1	1	1	1	2.1	59.939	531	2.1	0	6526600	0
Q04908	CAEEL 26S proteasome non-ATPase regulatory subunit 3	rpn-3	sp|Q04908|PSMD3_CAEEL 26S proteasome non-ATPase regulatory subunit 3 OS=Caenorhabditis elegans OX=6239 GN=rpn-3 PE=1 SV=1	1	1	1	2	57.506	504	2	0	15169000	0
Q05036	CAEEL Heat shock protein 110	hsp-110	sp|Q05036|HS110_CAEEL Heat shock protein 110 OS=Caenorhabditis elegans OX=6239 GN=hsp-110 PE=3 SV=1	1	1	1	1.2	86.896	776	1.2	0	9723700	0
Q07749	CAEEL Actin-depolymerizing factor 2, isoform c	unc-60	sp|Q07749|ADF2_CAEEL Actin-depolymerizing factor 2, isoform c OS=Caenorhabditis elegans OX=6239 GN=unc-60 PE=1 SV=1	1	1	1	7.2	17.046	152	7.2	7.2	52109000	50785000
Q07750	CAEEL Actin-depolymerizing factor 1, isoforms a/b	unc-60	sp|Q07750|ADF1_CAEEL Actin-depolymerizing factor 1, isoforms a/b OS=Caenorhabditis elegans OX=6239 GN=unc-60 PE=1 SV=2	1	1	1	7.5	23.578	212	7.5	0	4307300	0
Q09474	CAEEL Tryptophan 2,3-dioxygenase	tdo-2	sp|Q09474|T23O_CAEEL Tryptophan 2,3-dioxygenase OS=Caenorhabditis elegans OX=6239 GN=tdo-2 PE=1 SV=1	1	1	1	3.2	46.716	403	3.2	0	14487000	0
Q09477	CAEEL Zinc finger protein dpff-1	dpff-1	sp|Q09477|DPFF1_CAEEL Zinc finger protein dpff-1 OS=Caenorhabditis elegans OX=6239 GN=dpff-1 PE=3 SV=2	1	1	1	2.4	42.418	372	2.4	0	33243000	0
Q09486	CAEEL Uncharacterized protein	C30G12.2	tr|Q09486|Q09486_CAEEL Uncharacterized protein OS=Caenorhabditis elegans OX=6239 GN=C30G12.2 PE=1 SV=3	1	1	1	5.4	30.567	276	5.4	0	3913500	0
Q09489	CAEEL Thioredoxin domain-containing protein	C32D5.8	tr|Q09489|Q09489_CAEEL Thioredoxin domain-containing protein OS=Caenorhabditis elegans OX=6239 GN=C32D5.8 PE=1 SV=1	1	1	1	5	15.669	140	5	0	6766300	0
Q09508	CAEEL Succinate dehydrogenase [ubiquinone] flavoprotein subunit, mitochondrial	sdha-1	sp|Q09508|SDHA_CAEEL Succinate dehydrogenase [ubiquinone] flavoprotein subunit, mitochondrial OS=Caenorhabditis elegans OX=6239 GN=sdha-1 PE=2 SV=3	1	1	1	1.9	70.397	646	1.9	0	10533000	0
Q09509	CAEEL Putative folylpolyglutamate synthase	F25B5.6	sp|Q09509|FOLC_CAEEL Putative folylpolyglutamate synthase OS=Caenorhabditis elegans OX=6239 GN=F25B5.6 PE=3 SV=1	1	1	1	2.2	56.432	510	2.2	0	0	0
Q09533	CAEEL 60S ribosomal protein L10	rpl-10	sp|Q09533|RL10_CAEEL 60S ribosomal protein L10 OS=Caenorhabditis elegans OX=6239 GN=rpl-10 PE=3 SV=1	1	1	1	4.2	24.749	214	4.2	0	11783000	0
Q09545	CAEEL Succinate dehydrogenase [ubiquinone] iron-sulfur subunit, mitochondrial	sdhb-1	sp|Q09545|SDHB_CAEEL Succinate dehydrogenase [ubiquinone] iron-sulfur subunit, mitochondrial OS=Caenorhabditis elegans OX=6239 GN=sdhb-1 PE=2 SV=1	1	1	1	2.7	32.891	298	2.7	0	4424500	0
Q09596	CAEEL Probable glutathione S-transferase 5	gst-5	sp|Q09596|GST5_CAEEL Probable glutathione S-transferase 5 OS=Caenorhabditis elegans OX=6239 GN=gst-5 PE=1 SV=1	1	1	1	3.4	23.252	207	3.4	3.4	27068000	26180000
Q0G839	CAEEL PKS_ER domain-containing protein	CELE_M106.3	tr|Q0G839|Q0G839_CAEEL PKS_ER domain-containing protein OS=Caenorhabditis elegans OX=6239 GN=CELE_M106.3 PE=1 SV=1	1	1	1	4.4	39.807	365	4.4	0	3647400	0
Q8I711;Q10039	CAEEL Glycine--tRNA ligase	gars-1	tr|Q8I711|Q8I711_CAEEL Glycine--tRNA ligase OS=Caenorhabditis elegans OX=6239 GN=gars-1 PE=1 SV=1;sp|Q10039|GARS_CAEEL Glycine--tRNA ligase OS=Caenorhabditis elegans OX=6239 GN=gars-1 PE=1 SV=2	2	1	1	1.5	76.483	678	1.5	1.5	6028500	16383000
Q10454	CAEEL Probable arginine kinase F46H5.3	F46H5.3	sp|Q10454|KARG1_CAEEL Probable arginine kinase F46H5.3 OS=Caenorhabditis elegans OX=6239 GN=F46H5.3 PE=3 SV=2	1	1	1	2.5	44.167	396	2.5	2.5	0	57683000
Q10657	CAEEL Triosephosphate isomerase	tpi-1	sp|Q10657|TPIS_CAEEL Triosephosphate isomerase OS=Caenorhabditis elegans OX=6239 GN=tpi-1 PE=1 SV=2	1	1	1	4	26.574	247	4	0	23833000	0
Q11117	CAEEL LAMP family protein lmp-1	lmp-1	sp|Q11117|LMP1_CAEEL LAMP family protein lmp-1 OS=Caenorhabditis elegans OX=6239 GN=lmp-1 PE=2 SV=1	1	1	1	7.2	25.792	237	7.2	7.2	20287000	6795500
Q18906;Q17324;Q20950	CAEEL Cysteine protease (Fragment)		tr|Q18906|Q18906_CAEEL Cysteine protease (Fragment) OS=Caenorhabditis elegans OX=6239 PE=3 SV=1;tr|Q17324|Q17324_CAEEL Cysteine protease (Fragment) OS=Caenorhabditis elegans OX=6239 PE=3 SV=1;tr|Q20950|Q20950_CAEEL Pept_C1 domain-containing protein OS=Caen	3	1	1	8.3	14.247	133	8.3	0	9682000	0
Q17334	CAEEL Alcohol dehydrogenase 1	sodh-1	sp|Q17334|ADH1_CAEEL Alcohol dehydrogenase 1 OS=Caenorhabditis elegans OX=6239 GN=sodh-1 PE=2 SV=2	1	1	1	2.6	37.696	349	2.6	0	0	0
Q7K798;Q7K797;Q9U302;Q17350	CAEEL Polyadenylate-binding protein	pab-1	tr|Q7K798|Q7K798_CAEEL Polyadenylate-binding protein OS=Caenorhabditis elegans OX=6239 GN=pab-1 PE=1 SV=1;tr|Q7K797|Q7K797_CAEEL Polyadenylate-binding protein OS=Caenorhabditis elegans OX=6239 GN=pab-1 PE=1 SV=1;tr|Q9U302|Q9U302_CAEEL Polyadenylate-binding	4	1	1	1.4	64.767	583	1.4	1.4	4215200	20508000
Q17574	CAEEL Methionine synthase reductase	mtrr-1	sp|Q17574|MTRR_CAEEL Methionine synthase reductase OS=Caenorhabditis elegans OX=6239 GN=mtrr-1 PE=3 SV=1	1	1	1	3.8	76.833	682	3.8	0	55552000	0
Q17763	CAEEL ATP synthase subunit	atp-5	tr|Q17763|Q17763_CAEEL ATP synthase subunit OS=Caenorhabditis elegans OX=6239 GN=atp-5 PE=1 SV=2	1	1	1	4.7	21.797	191	4.7	0	33624000	0
Q18032	CAEEL Uncharacterized protein	C15H9.9	tr|Q18032|Q18032_CAEEL Uncharacterized protein OS=Caenorhabditis elegans OX=6239 GN=C15H9.9 PE=1 SV=1	1	1	1	8	14.507	137	8	0	5667300	0
Q18068	CAEEL Uncharacterized protein	C18A11.3	tr|Q18068|Q18068_CAEEL Uncharacterized protein OS=Caenorhabditis elegans OX=6239 GN=C18A11.3 PE=1 SV=3	1	1	1	3.4	30.363	268	3.4	0	0	0
Q18115	CAEEL 26S proteasome non-ATPase regulatory subunit 1	rpn-2	sp|Q18115|PSMD1_CAEEL 26S proteasome non-ATPase regulatory subunit 1 OS=Caenorhabditis elegans OX=6239 GN=rpn-2 PE=3 SV=4	1	1	1	1.2	106.01	965	1.2	0	3709100	0
W6RY53;Q18196	CAEEL Uncharacterized protein	C26B2.7	tr|W6RY53|W6RY53_CAEEL Uncharacterized protein OS=Caenorhabditis elegans OX=6239 GN=C26B2.7 PE=1 SV=1;tr|Q18196|Q18196_CAEEL Uncharacterized protein OS=Caenorhabditis elegans OX=6239 GN=C26B2.7 PE=1 SV=1	2	1	1	10	11.671	100	10	0	0	0
Q18211	CAEEL Regulator of chromosome condensation	ran-3	sp|Q18211|RCC1_CAEEL Regulator of chromosome condensation OS=Caenorhabditis elegans OX=6239 GN=ran-3 PE=4 SV=1	1	1	1	1.8	61.484	569	1.8	0	13906000	0
Q18787	CAEEL 26S proteasome regulatory subunit 7	rpt-1	sp|Q18787|PRS7_CAEEL 26S proteasome regulatory subunit 7 OS=Caenorhabditis elegans OX=6239 GN=rpt-1 PE=1 SV=1	1	1	1	2.1	48.61	435	2.1	0	3891400	0
Q19007	CAEEL Nucleosome Assembly Protein	nap-1	tr|Q19007|Q19007_CAEEL Nucleosome Assembly Protein OS=Caenorhabditis elegans OX=6239 GN=nap-1 PE=1 SV=1	1	1	1	3.5	35.664	316	3.5	0	47345000	0
Q19058	CAEEL MAO-C-like dehydratase domain	maoc-1	tr|Q19058|Q19058_CAEEL MAO-C-like dehydratase domain OS=Caenorhabditis elegans OX=6239 GN=maoc-1 PE=1 SV=1	1	1	1	3	32.721	298	3	0	5695800	0
Q19328	CAEEL Staphylococcal nuclease domain-containing protein	tsn-1	tr|Q19328|Q19328_CAEEL Staphylococcal nuclease domain-containing protein OS=Caenorhabditis elegans OX=6239 GN=tsn-1 PE=1 SV=1	1	1	1	1.4	100.77	914	1.4	0	10716000	0
Q9U3I6;Q19584	CAEEL Ubiquitin fusion degradation protein 1 homolog	ufd-1	tr|Q9U3I6|Q9U3I6_CAEEL Ubiquitin fusion degradation protein 1 homolog OS=Caenorhabditis elegans OX=6239 GN=ufd-1 PE=1 SV=1;sp|Q19584|UFD1_CAEEL Ubiquitin fusion degradation protein 1 homolog OS=Caenorhabditis elegans OX=6239 GN=ufd-1 PE=1 SV=1	2	1	1	2.7	36.521	336	2.7	0	0	0
Q19655	CAEEL Rieske domain-containing protein	CELE_F20D6.11	tr|Q19655|Q19655_CAEEL Rieske domain-containing protein OS=Caenorhabditis elegans OX=6239 GN=CELE_F20D6.11 PE=1 SV=2	1	1	1	1.6	60.263	549	1.6	0	22032000	0
Q19766	CAEEL Mitochondrial import receptor subunit TOM20 homolog	tomm-20	sp|Q19766|TOM20_CAEEL Mitochondrial import receptor subunit TOM20 homolog OS=Caenorhabditis elegans OX=6239 GN=tomm-20 PE=1 SV=1	1	1	1	5.3	20.426	188	5.3	0	4247200	0
Q19818	CAEEL NHL (Ring finger b-box coiled coil) domain containing	nhl-2	tr|Q19818|Q19818_CAEEL NHL (Ring finger b-box coiled coil) domain containing OS=Caenorhabditis elegans OX=6239 GN=nhl-2 PE=1 SV=2	1	1	1	1.2	112.16	1032	1.2	1.2	0	102000000
Q20059	CAEEL WD repeat-containing protein 48 homolog	wdr-48	sp|Q20059|WDR48_CAEEL WD repeat-containing protein 48 homolog OS=Caenorhabditis elegans OX=6239 GN=wdr-48 PE=1 SV=2	1	1	1	1.3	76.673	683	1.3	0	4446100	0
Q20168	CAEEL Probable coatomer subunit beta	copb-2	sp|Q20168|COPB2_CAEEL Probable coatomer subunit beta OS=Caenorhabditis elegans OX=6239 GN=copb-2 PE=3 SV=3	1	1	1	1.2	111.11	1000	1.2	0	3803300	0
Q20264	CAEEL Fatty Acid CoA Synthetase family	acs-11	tr|Q20264|Q20264_CAEEL Fatty Acid CoA Synthetase family OS=Caenorhabditis elegans OX=6239 GN=acs-11 PE=1 SV=3	1	1	1	2.8	55.735	505	2.8	0	4714000	0
Q20471	CAEEL Casein kinase I isoform delta	kin-20	sp|Q20471|KIN20_CAEEL Casein kinase I isoform delta OS=Caenorhabditis elegans OX=6239 GN=kin-20 PE=2 SV=3	1	1	1	2.2	56.808	497	2.2	0	5509600	0
Q20480	CAEEL NAD-dependent protein deacylase sir-2.2	sir-2.2	sp|Q20480|SIR41_CAEEL NAD-dependent protein deacylase sir-2.2 OS=Caenorhabditis elegans OX=6239 GN=sir-2.2 PE=1 SV=1	1	1	1	3.5	32.347	287	3.5	0	4959300	0
Q20939	CAEEL Putative pyridoxamine 5-phosphate oxidase	F57B9.1	sp|Q20939|PDXH_CAEEL Putative pyridoxamine 5-phosphate oxidase OS=Caenorhabditis elegans OX=6239 GN=F57B9.1 PE=3 SV=2	1	1	1	5.3	26.1	226	5.3	0	0	0
Q20970	CAEEL Methionine--tRNA ligase, cytoplasmic	mars-1	sp|Q20970|SYMC_CAEEL Methionine--tRNA ligase, cytoplasmic OS=Caenorhabditis elegans OX=6239 GN=mars-1 PE=3 SV=1	1	1	1	1.4	101.71	917	1.4	0	12918000	0
Q21166	CAEEL Acetoacetyl-CoA synthetase	sur-5	sp|Q21166|SUR5_CAEEL Acetoacetyl-CoA synthetase OS=Caenorhabditis elegans OX=6239 GN=sur-5 PE=2 SV=1	1	1	1	1.6	78.338	700	1.6	1.6	12456000	0
Q21210	CAEEL Uncharacterized protein	CELE_K04C2.2	tr|Q21210|Q21210_CAEEL Uncharacterized protein OS=Caenorhabditis elegans OX=6239 GN=CELE_K04C2.2 PE=1 SV=1	1	1	1	1	109.85	990	1	0	0	0
Q21278	CAEEL Pre-mRNA-splicing factor SLU7	K07C5.6	sp|Q21278|SLU7_CAEEL Pre-mRNA-splicing factor SLU7 OS=Caenorhabditis elegans OX=6239 GN=K07C5.6 PE=3 SV=1	1	1	1	1.7	74.46	647	1.7	0	111790000	0
Q21312	CAEEL Uncharacterized protein	CELE_K08C7.1	tr|Q21312|Q21312_CAEEL Uncharacterized protein OS=Caenorhabditis elegans OX=6239 GN=CELE_K08C7.1 PE=1 SV=3	1	1	1	2.8	48.524	431	2.8	0	1779700	0
Q21350	CAEEL AAA domain-containing protein	ctf-18	tr|Q21350|Q21350_CAEEL AAA domain-containing protein OS=Caenorhabditis elegans OX=6239 GN=ctf-18 PE=1 SV=1	1	1	1	1.2	96.891	850	1.2	0	0	0
Q21436	CAEEL Nuclear Pore complex Protein	npp-3	tr|Q21436|Q21436_CAEEL Nuclear Pore complex Protein OS=Caenorhabditis elegans OX=6239 GN=npp-3 PE=1 SV=1	1	1	1	0.9	191.32	1696	0.9	0.9	0	1645600
Q21481	CAEEL SCP2 domain-containing protein	dhs-28	tr|Q21481|Q21481_CAEEL SCP2 domain-containing protein OS=Caenorhabditis elegans OX=6239 GN=dhs-28 PE=1 SV=1	1	1	1	2.8	46.262	436	2.8	0	0	0
Q21525	CAEEL Uncharacterized protein	taap-1	tr|Q21525|Q21525_CAEEL Uncharacterized protein OS=Caenorhabditis elegans OX=6239 GN=taap-1 PE=1 SV=1	1	1	1	9.3	18.288	161	9.3	0	4094100	0
Q21641	CAEEL Uncharacterized protein	CELE_R02E12.4	tr|Q21641|Q21641_CAEEL Uncharacterized protein OS=Caenorhabditis elegans OX=6239 GN=CELE_R02E12.4 PE=4 SV=2	1	1	1	3.5	46.458	400	3.5	0	29812000	0
Q21732	CAEEL Uncharacterized protein	CELE_R04F11.2	tr|Q21732|Q21732_CAEEL Uncharacterized protein OS=Caenorhabditis elegans OX=6239 GN=CELE_R04F11.2 PE=1 SV=1	1	1	1	9.3	12.303	107	9.3	9.3	130530000	63412000
Q21740	CAEEL DFDF domain-containing protein	edc-3	tr|Q21740|Q21740_CAEEL DFDF domain-containing protein OS=Caenorhabditis elegans OX=6239 GN=edc-3 PE=1 SV=1	1	1	1	1.8	62.637	566	1.8	1.8	0	27378000
Q21746	CAEEL Small Glutamine-rich Tetratrico repeat protein	sgt-1	tr|Q21746|Q21746_CAEEL Small Glutamine-rich Tetratrico repeat protein OS=Caenorhabditis elegans OX=6239 GN=sgt-1 PE=1 SV=1	1	1	1	3.3	36.467	337	3.3	0	2836800	0
Q21752	CAEEL Probable voltage-dependent anion-selective channel	vdac-1	sp|Q21752|VDAC_CAEEL Probable voltage-dependent anion-selective channel OS=Caenorhabditis elegans OX=6239 GN=vdac-1 PE=3 SV=2	1	1	1	3.9	29.96	283	3.9	0	38295000	0
Q21831	CAEEL SNF chromatin remodeling Complex component	snfc-5	tr|Q21831|Q21831_CAEEL SNF chromatin remodeling Complex component OS=Caenorhabditis elegans OX=6239 GN=snfc-5 PE=1 SV=1	1	1	1	2.6	42.846	381	2.6	0	30008000	0
Q21898	CAEEL V-type proton ATPase 16 kDa proteolipid subunit 1	vha-1	sp|Q21898|VATL1_CAEEL V-type proton ATPase 16 kDa proteolipid subunit 1 OS=Caenorhabditis elegans OX=6239 GN=vha-1 PE=2 SV=1	1	1	1	4.1	16.954	169	4.1	0	11711000	0
Q21925	CAEEL ProstaGlandin E Synthase homolog	pges-2	tr|Q21925|Q21925_CAEEL ProstaGlandin E Synthase homolog OS=Caenorhabditis elegans OX=6239 GN=pges-2 PE=1 SV=1	1	1	1	3.2	40.292	347	3.2	0	4924800	0
Q86LS6;Q21962	CAEEL Glycine cleavage system P protein	gldc-1	tr|Q86LS6|Q86LS6_CAEEL Glycine cleavage system P protein OS=Caenorhabditis elegans OX=6239 GN=gldc-1 PE=1 SV=2;tr|Q21962|Q21962_CAEEL Glycine cleavage system P protein OS=Caenorhabditis elegans OX=6239 GN=gldc-1 PE=1 SV=1	2	1	1	1.1	101.49	915	1.1	1.1	9653200	2215500
Q22038	CAEEL Ras-like GTP-binding protein rhoA	rho-1	sp|Q22038|RHO1_CAEEL Ras-like GTP-binding protein rhoA OS=Caenorhabditis elegans OX=6239 GN=rho-1 PE=1 SV=1	1	1	1	4.7	21.635	192	4.7	4.7	91581000	82345000
Q22109	CAEEL MFS domain-containing protein	mct-5	tr|Q22109|Q22109_CAEEL MFS domain-containing protein OS=Caenorhabditis elegans OX=6239 GN=mct-5 PE=1 SV=2	1	1	1	1.5	64.447	591	1.5	0	11488000	0
Q22111	CAEEL Methylmalonic aciduria type A homolog, mitochondrial	mmaa-1	sp|Q22111|MMAA1_CAEEL Methylmalonic aciduria type A homolog, mitochondrial OS=Caenorhabditis elegans OX=6239 GN=mmaa-1 PE=3 SV=2	1	1	1	3.3	44.216	399	3.3	0	3502500	0
Q22347	CAEEL Probable medium-chain specific acyl-CoA dehydrogenase 10, mitochondrial	acdh-10	sp|Q22347|ACADM_CAEEL Probable medium-chain specific acyl-CoA dehydrogenase 10, mitochondrial OS=Caenorhabditis elegans OX=6239 GN=acdh-10 PE=2 SV=1	1	1	1	1.9	44.818	417	1.9	0	42206000	0
Q22559	CAEEL PDZ domain-containing protein	CELE_T19B10.5	tr|Q22559|Q22559_CAEEL PDZ domain-containing protein OS=Caenorhabditis elegans OX=6239 GN=CELE_T19B10.5 PE=1 SV=3	1	1	1	2	65.808	596	2	0	994650	0
Q22781	CAEEL Acyl CoA DeHydrogenase	acdh-7	tr|Q22781|Q22781_CAEEL Acyl CoA DeHydrogenase OS=Caenorhabditis elegans OX=6239 GN=acdh-7 PE=1 SV=2	1	1	1	3.6	44.617	412	3.6	0	2100900	0
Q22806	CAEEL Uncharacterized protein	CELE_T26A8.1	tr|Q22806|Q22806_CAEEL Uncharacterized protein OS=Caenorhabditis elegans OX=6239 GN=CELE_T26A8.1 PE=1 SV=1	1	1	1	1.4	77.376	708	1.4	0	3577800	0
Q22968	CAEEL Aminomethyltransferase	gcst-1	tr|Q22968|Q22968_CAEEL Aminomethyltransferase OS=Caenorhabditis elegans OX=6239 GN=gcst-1 PE=1 SV=1	1	1	1	2.5	43.92	402	2.5	0	13258000	0
Q23050	CAEEL CaLponIn-liKe proteins	clik-1	tr|Q23050|Q23050_CAEEL CaLponIn-liKe proteins OS=Caenorhabditis elegans OX=6239 GN=clik-1 PE=1 SV=1	1	1	1	3.4	44.367	406	3.4	0	7945400	0
Q8MPS6;Q23089	CAEEL CRM1_C domain-containing protein	xpo-1	tr|Q8MPS6|Q8MPS6_CAEEL CRM1_C domain-containing protein OS=Caenorhabditis elegans OX=6239 GN=xpo-1 PE=1 SV=1;tr|Q23089|Q23089_CAEEL Importin N-terminal domain-containing protein OS=Caenorhabditis elegans OX=6239 GN=xpo-1 PE=1 SV=2	2	1	1	12.7	9.4494	79	12.7	0	26728000	0
Q23092	CAEEL Fatty acid-binding protein homolog 4	lbp-4	sp|Q23092|FABP4_CAEEL Fatty acid-binding protein homolog 4 OS=Caenorhabditis elegans OX=6239 GN=lbp-4 PE=3 SV=1	1	1	1	6.9	17.184	145	6.9	6.9	35372000	45955000
Q23194	CAEEL Vacuolar protein sorting-associated protein 18 homolog	vps-18	sp|Q23194|VPS18_CAEEL Vacuolar protein sorting-associated protein 18 homolog OS=Caenorhabditis elegans OX=6239 GN=vps-18 PE=1 SV=4	1	1	1	1	116.67	1026	1	0	0	0
Q23315	CAEEL Glutamyl(E) Amino-acyl tRNA Synthetase	ears-1	tr|Q23315|Q23315_CAEEL Glutamyl(E) Amino-acyl tRNA Synthetase OS=Caenorhabditis elegans OX=6239 GN=ears-1 PE=1 SV=1	1	1	1	1.1	125.2	1149	1.1	1.1	50187000	73344000
Q23381	CAEEL Probable methylmalonyl-CoA mutase, mitochondrial	mmcm-1	sp|Q23381|MUTA_CAEEL Probable methylmalonyl-CoA mutase, mitochondrial OS=Caenorhabditis elegans OX=6239 GN=mmcm-1 PE=3 SV=2	1	1	1	1.1	81.683	744	1.1	0	9769300	0
Q23449	CAEEL 26S proteasome non-ATPase regulatory subunit 8	rpn-12	sp|Q23449|PSMD8_CAEEL 26S proteasome non-ATPase regulatory subunit 8 OS=Caenorhabditis elegans OX=6239 GN=rpn-12 PE=3 SV=1	1	1	1	5.2	28.795	250	5.2	0	4058200	0
Q7Z145;Q23487	CAEEL FUBp (FUBP) Like	fubl-2	tr|Q7Z145|Q7Z145_CAEEL FUBp (FUBP) Like OS=Caenorhabditis elegans OX=6239 GN=fubl-2 PE=1 SV=1;tr|Q23487|Q23487_CAEEL FUBp (FUBP) Like OS=Caenorhabditis elegans OX=6239 GN=fubl-2 PE=1 SV=2	2	1	1	1.8	54.465	510	1.8	0	10050000	0
Q23571	CAEEL Lipoamide acyltransferase component of branched-chain alpha-keto acid dehydrogenase complex, mitochondrial	dbt-1	sp|Q23571|ODB2_CAEEL Lipoamide acyltransferase component of branched-chain alpha-keto acid dehydrogenase complex, mitochondrial OS=Caenorhabditis elegans OX=6239 GN=dbt-1 PE=2 SV=1	1	1	1	2.5	49.691	448	2.5	2.5	30273000	60260000
Q27365	CAEEL Protein lin-15A	lin-15A	sp|Q27365|LI15A_CAEEL Protein lin-15A OS=Caenorhabditis elegans OX=6239 GN=lin-15A PE=2 SV=1	1	1	1	1.3	80.062	719	1.3	0	8532200	0
Q27464	CAEEL Glucose-6-phosphate 1-dehydrogenase	gspd-1	sp|Q27464|G6PD_CAEEL Glucose-6-phosphate 1-dehydrogenase OS=Caenorhabditis elegans OX=6239 GN=gspd-1 PE=3 SV=1	1	1	1	1.7	60.215	522	1.7	1.7	64143000	175370000
Q27521	CAEEL Nuclear hormone receptor family member nhr-16	nhr-16	sp|Q27521|NHR16_CAEEL Nuclear hormone receptor family member nhr-16 OS=Caenorhabditis elegans OX=6239 GN=nhr-16 PE=2 SV=3	1	1	1	2.3	44.462	388	2.3	0	65166000	0
Q27GU2	CAEEL FABP domain-containing protein	lbp-3	tr|Q27GU2|Q27GU2_CAEEL FABP domain-containing protein OS=Caenorhabditis elegans OX=6239 GN=lbp-3 PE=1 SV=1	1	1	1	6.7	17.32	150	6.7	6.7	6733800	17475000
Q304E5;Q9TZQ3	CAEEL Guanyl-specific ribonuclease pgl-1	pgl-1	tr|Q304E5|Q304E5_CAEEL Guanyl-specific ribonuclease pgl-1 OS=Caenorhabditis elegans OX=6239 GN=pgl-1 PE=1 SV=1;sp|Q9TZQ3|PGL1_CAEEL Guanyl-specific ribonuclease pgl-1 OS=Caenorhabditis elegans OX=6239 GN=pgl-1 PE=1 SV=1	2	1	1	2.2	83.454	771	2.2	0	11158000	0
Q564Q1	CAEEL UDP-glucose 4-epimerase	gale-1	sp|Q564Q1|GALE_CAEEL UDP-glucose 4-epimerase OS=Caenorhabditis elegans OX=6239 GN=gale-1 PE=1 SV=1	1	1	1	4.3	37.883	349	4.3	0	20144000	0
Q5CCJ3;Q5CCJ2;Q9N5N9	CAEEL rRNA methyltransferase	CELE_H06I04.3	tr|Q5CCJ3|Q5CCJ3_CAEEL rRNA methyltransferase OS=Caenorhabditis elegans OX=6239 GN=CELE_H06I04.3 PE=1 SV=1;tr|Q5CCJ2|Q5CCJ2_CAEEL Putative rRNA methyltransferase OS=Caenorhabditis elegans OX=6239 GN=CELE_H06I04.3 PE=1 SV=1;tr|Q9N5N9|Q9N5N9_CAEEL Putative r	3	1	1	1.3	81.525	716	1.3	0	55992000	0
Q5F4W0	CAEEL CaDHerin family	cdh-1	tr|Q5F4W0|Q5F4W0_CAEEL CaDHerin family OS=Caenorhabditis elegans OX=6239 GN=cdh-1 PE=4 SV=1	1	1	1	0.4	306.34	2779	0.4	0	6651400	0
Q8MNU8	CAEEL Protein FMC1 homolog	C29E4.12	sp|Q8MNU8|FMC1_CAEEL Protein FMC1 homolog OS=Caenorhabditis elegans OX=6239 GN=C29E4.12 PE=3 SV=1	1	1	1	9.3	12.138	108	9.3	9.3	13496000	32873000
Q8MXR6	CAEEL Homologous to Drosophila SQD (Squid) protein	sqd-1	tr|Q8MXR6|Q8MXR6_CAEEL Homologous to Drosophila SQD (Squid) protein OS=Caenorhabditis elegans OX=6239 GN=sqd-1 PE=1 SV=1	1	1	1	4.6	33.467	305	4.6	0	2153500	0
Q93315	CAEEL Cytochrome b5 heme-binding domain-containing protein	cytb-5.1	tr|Q93315|Q93315_CAEEL Cytochrome b5 heme-binding domain-containing protein OS=Caenorhabditis elegans OX=6239 GN=cytb-5.1 PE=1 SV=2	1	1	1	6.7	15.032	134	6.7	0	0	0
Q93615	CAEEL Probable electron transfer flavoprotein subunit alpha, mitochondrial	F27D4.1	sp|Q93615|ETFA_CAEEL Probable electron transfer flavoprotein subunit alpha, mitochondrial OS=Caenorhabditis elegans OX=6239 GN=F27D4.1 PE=3 SV=2	1	1	1	2.4	34.454	332	2.4	2.4	26282000	5556000
Q93761	CAEEL Uncharacterized oxidoreductase F53C11.3	F53C11.3	sp|Q93761|YXEK_CAEEL Uncharacterized oxidoreductase F53C11.3 OS=Caenorhabditis elegans OX=6239 GN=F53C11.3 PE=3 SV=1	1	1	1	4.2	33.389	313	4.2	0	3960300	0
Q93871	CAEEL Equilibrative Nucleoside Transporter	ent-2	tr|Q93871|Q93871_CAEEL Equilibrative Nucleoside Transporter OS=Caenorhabditis elegans OX=6239 GN=ent-2 PE=1 SV=1	1	1	1	2.9	50.495	450	2.9	0	31537000	0
Q95XE0	CAEEL SET domain-containing protein	set-28	tr|Q95XE0|Q95XE0_CAEEL SET domain-containing protein OS=Caenorhabditis elegans OX=6239 GN=set-28 PE=4 SV=1	1	1	1	3.8	27.462	240	3.8	0	0	0
Q95XS1	CAEEL TRanslocon-Associated Protein	trap-3	tr|Q95XS1|Q95XS1_CAEEL TRanslocon-Associated Protein OS=Caenorhabditis elegans OX=6239 GN=trap-3 PE=1 SV=1	1	1	1	5.6	19.702	178	5.6	0	11579000	0
Q95XS2	CAEEL Protein transport protein Sec61 subunit beta	sec-61.b	tr|Q95XS2|Q95XS2_CAEEL Protein transport protein Sec61 subunit beta OS=Caenorhabditis elegans OX=6239 GN=sec-61.b PE=1 SV=1	1	1	1	12.3	8.5558	81	12.3	0	6818300	0
Q95Y90	CAEEL 60S ribosomal protein L9	rpl-9	sp|Q95Y90|RL9_CAEEL 60S ribosomal protein L9 OS=Caenorhabditis elegans OX=6239 GN=rpl-9 PE=3 SV=1	1	1	1	4.2	21.508	189	4.2	4.2	144910000	135700000
Q9BKX2	CAEEL F-box domain-containing protein	CELE_Y22D7AR.2	tr|Q9BKX2|Q9BKX2_CAEEL F-box domain-containing protein OS=Caenorhabditis elegans OX=6239 GN=CELE_Y22D7AR.2 PE=1 SV=3	1	1	1	1.6	127.55	1133	1.6	1.6	4011000	21549000
Q9BL46	CAEEL M20_dimer domain-containing protein	CELE_Y71H2AM.11	tr|Q9BL46|Q9BL46_CAEEL M20_dimer domain-containing protein OS=Caenorhabditis elegans OX=6239 GN=CELE_Y71H2AM.11 PE=1 SV=4	1	1	1	3	52.25	472	3	0	8102400	0
Q9BPN8	CAEEL Uncharacterized protein Y92H12BR.3	Y92H12BR.3	sp|Q9BPN8|Y92H3_CAEEL Uncharacterized protein Y92H12BR.3 OS=Caenorhabditis elegans OX=6239 GN=Y92H12BR.3 PE=1 SV=2	1	1	1	1.9	71.086	637	1.9	0	2702100	0
Q9GZE9	CAEEL Lipid droplet localized protein	ldp-1	sp|Q9GZE9|LDP1_CAEEL Lipid droplet localized protein OS=Caenorhabditis elegans OX=6239 GN=ldp-1 PE=1 SV=1	1	1	1	2.1	47.293	426	2.1	0	25391000	0
V6CIZ1;V6CLC6;Q9GZH3	CAEEL CBS domain-containing protein	CELE_T22D1.3	tr|V6CIZ1|V6CIZ1_CAEEL CBS domain-containing protein OS=Caenorhabditis elegans OX=6239 GN=CELE_T22D1.3 PE=1 SV=1;tr|V6CLC6|V6CLC6_CAEEL Inosine-5-monophosphate dehydrogenase OS=Caenorhabditis elegans OX=6239 GN=CELE_T22D1.3 PE=1 SV=1;sp|Q9GZH3|IMDH_CAEEL	3	1	1	2.7	36.699	338	2.7	0	7319000	0
Q9GZH5	CAEEL 26S proteasome non-ATPase regulatory subunit 2	rpn-1	tr|Q9GZH5|Q9GZH5_CAEEL 26S proteasome non-ATPase regulatory subunit 2 OS=Caenorhabditis elegans OX=6239 GN=rpn-1 PE=1 SV=1	1	1	1	0.9	107.38	981	0.9	0.9	97784000	49297000
V6CK48;Q9N302;V6CLI5	CAEEL AMP-binding domain-containing protein	acs-13	tr|V6CK48|V6CK48_CAEEL AMP-binding domain-containing protein OS=Caenorhabditis elegans OX=6239 GN=acs-13 PE=1 SV=1;tr|Q9N302|Q9N302_CAEEL AMP-binding domain-containing protein OS=Caenorhabditis elegans OX=6239 GN=acs-13 PE=1 SV=1;tr|V6CLI5|V6CLI5_CAEEL AMP	3	1	1	1.6	74.568	676	1.6	0	8171400	0
Q9N4G8	CAEEL Receptor expression-enhancing protein	yop-1	tr|Q9N4G8|Q9N4G8_CAEEL Receptor expression-enhancing protein OS=Caenorhabditis elegans OX=6239 GN=yop-1 PE=1 SV=1	1	1	1	4.4	20.564	183	4.4	4.4	56167000	29875000
Q9N4J2	CAEEL Vitellogenin-3	vit-3	sp|Q9N4J2|VIT3_CAEEL Vitellogenin-3 OS=Caenorhabditis elegans OX=6239 GN=vit-3 PE=1 SV=1	1	12	1	6.8	186.53	1603	6.8	2.1	9046300	0
Q9N4J8	CAEEL T-complex protein 1 subunit gamma	cct-3	sp|Q9N4J8|TCPG_CAEEL T-complex protein 1 subunit gamma OS=Caenorhabditis elegans OX=6239 GN=cct-3 PE=3 SV=3	1	1	1	1.7	60.457	543	1.7	0	16321000	0
Q9N5B3	CAEEL Peptidase_M24 domain-containing protein	CELE_W08E12.7	tr|Q9N5B3|Q9N5B3_CAEEL Peptidase_M24 domain-containing protein OS=Caenorhabditis elegans OX=6239 GN=CELE_W08E12.7 PE=1 SV=1	1	1	1	2	43.032	391	2	2	156670000	187590000
Q9N5V3	CAEEL Importin N-terminal domain-containing protein	imb-3	tr|Q9N5V3|Q9N5V3_CAEEL Importin N-terminal domain-containing protein OS=Caenorhabditis elegans OX=6239 GN=imb-3 PE=1 SV=2	1	1	1	1	122.03	1092	1	0	7225600	0
Q9N5Y2	CAEEL Probable very-long-chain enoyl-CoA reductase art-1	art-1	sp|Q9N5Y2|TECR_CAEEL Probable very-long-chain enoyl-CoA reductase art-1 OS=Caenorhabditis elegans OX=6239 GN=art-1 PE=3 SV=1	1	1	1	3.2	35.109	308	3.2	0	5616800	0
Q9NA78	CAEEL Thioredoxin domain-containing protein	txdc-12.1	tr|Q9NA78|Q9NA78_CAEEL Thioredoxin domain-containing protein OS=Caenorhabditis elegans OX=6239 GN=txdc-12.1 PE=1 SV=1	1	1	1	4.8	21.467	186	4.8	0	13788000	0
Q9NA98	CAEEL Actin-Related Proteins	arp-1	tr|Q9NA98|Q9NA98_CAEEL Actin-Related Proteins OS=Caenorhabditis elegans OX=6239 GN=arp-1 PE=1 SV=2	1	1	1	2.7	42.071	374	2.7	0	18914000	0
Q9NAH4	CAEEL Density-regulated protein homolog	Y47D3A.21	sp|Q9NAH4|DENR_CAEEL Density-regulated protein homolog OS=Caenorhabditis elegans OX=6239 GN=Y47D3A.21 PE=3 SV=1	1	1	1	7.3	20.349	192	7.3	0	29749000	0
Q9NEU2	CAEEL Protein SDA1 homolog	pro-3	sp|Q9NEU2|SDA1_CAEEL Protein SDA1 homolog OS=Caenorhabditis elegans OX=6239 GN=pro-3 PE=1 SV=4	1	1	1	1.2	92.13	801	1.2	0	0	0
Q9TXR4	CAEEL DNA_MISMATCH_REPAIR_2 domain-containing protein	msh-2	tr|Q9TXR4|Q9TXR4_CAEEL DNA_MISMATCH_REPAIR_2 domain-containing protein OS=Caenorhabditis elegans OX=6239 GN=msh-2 PE=1 SV=1	1	1	1	1.2	95.853	849	1.2	0	0	0
Q9TXZ9	CAEEL YKT6 (Yeast v-SNARE) homolog	ykt-6	tr|Q9TXZ9|Q9TXZ9_CAEEL YKT6 (Yeast v-SNARE) homolog OS=Caenorhabditis elegans OX=6239 GN=ykt-6 PE=1 SV=1	1	1	1	5	23.15	201	5	0	0	0
Q9TYL9	CAEEL Coatomer subunit beta	copb-1	tr|Q9TYL9|Q9TYL9_CAEEL Coatomer subunit beta OS=Caenorhabditis elegans OX=6239 GN=copb-1 PE=1 SV=1	1	1	1	1	107.53	971	1	0	11851000	0
Q9TZ51	CAEEL Fatty Acid/Retinol binding protein	far-7	tr|Q9TZ51|Q9TZ51_CAEEL Fatty Acid/Retinol binding protein OS=Caenorhabditis elegans OX=6239 GN=far-7 PE=1 SV=1	1	1	1	7.2	15.375	138	7.2	0	6753100	0
Q9TZ69	CAEEL UBIQUITIN_CONJUGAT_2 domain-containing protein	ubc-20	tr|Q9TZ69|Q9TZ69_CAEEL UBIQUITIN_CONJUGAT_2 domain-containing protein OS=Caenorhabditis elegans OX=6239 GN=ubc-20 PE=1 SV=1	1	1	1	4.5	22.29	199	4.5	0	5474600	0
Q9U2X0	CAEEL Protein arginine N-methyltransferase 1	prmt-1	sp|Q9U2X0|ANM1_CAEEL Protein arginine N-methyltransferase 1 OS=Caenorhabditis elegans OX=6239 GN=prmt-1 PE=1 SV=1	1	1	1	3.4	39.771	348	3.4	3.4	0	4367400
Q9U315	CAEEL DUF4440 domain-containing protein	CELE_Y105C5B.5	tr|Q9U315|Q9U315_CAEEL DUF4440 domain-containing protein OS=Caenorhabditis elegans OX=6239 GN=CELE_Y105C5B.5 PE=1 SV=1	1	1	1	7.1	14.124	127	7.1	7.1	17567000	71849000
Q9U354	CAEEL Related to yeast Vacuolar Protein Sorting factor	vps-25	tr|Q9U354|Q9U354_CAEEL Related to yeast Vacuolar Protein Sorting factor OS=Caenorhabditis elegans OX=6239 GN=vps-25 PE=1 SV=1	1	1	1	6	21.473	183	6	6	6321300	3946400
Q9U3C8	CAEEL Defective in cullin neddylation protein 1	dcn-1	sp|Q9U3C8|DCN1_CAEEL Defective in cullin neddylation protein 1 OS=Caenorhabditis elegans OX=6239 GN=dcn-1 PE=1 SV=2	1	1	1	4.1	34.133	295	4.1	0	5049600	0
Q9U3F4	CAEEL Zyxin	zyx-1	sp|Q9U3F4|ZYX_CAEEL Zyxin OS=Caenorhabditis elegans OX=6239 GN=zyx-1 PE=1 SV=1	1	1	1	1.5	66.774	603	1.5	0	69673000	0
Q9XTT9	CAEEL 26S proteasome regulatory subunit 8	rpt-6	sp|Q9XTT9|PRS8_CAEEL 26S proteasome regulatory subunit 8 OS=Caenorhabditis elegans OX=6239 GN=rpt-6 PE=1 SV=1	1	1	1	3.1	46.249	416	3.1	3.1	16553000	0
Q9XUY0	CAEEL Uncharacterized protein	CELE_F56G4.6	tr|Q9XUY0|Q9XUY0_CAEEL Uncharacterized protein OS=Caenorhabditis elegans OX=6239 GN=CELE_F56G4.6 PE=1 SV=3	1	1	1	1.5	97.093	843	1.5	0	2913500	0
Q9XV73	CAEEL F-box domain-containing protein	CELE_F21D9.1	tr|Q9XV73|Q9XV73_CAEEL F-box domain-containing protein OS=Caenorhabditis elegans OX=6239 GN=CELE_F21D9.1 PE=4 SV=1	1	1	1	5.4	44.231	367	5.4	0	12731000	0
Q9XVK5	CAEEL NEDD8-conjugating enzyme ubc-12	ubc-12	sp|Q9XVK5|UBC12_CAEEL NEDD8-conjugating enzyme ubc-12 OS=Caenorhabditis elegans OX=6239 GN=ubc-12 PE=2 SV=1	1	1	1	5	21.101	180	5	5	12143000	14498000
Q9XVR9	CAEEL Uncharacterized protein	C25A1.15	tr|Q9XVR9|Q9XVR9_CAEEL Uncharacterized protein OS=Caenorhabditis elegans OX=6239 GN=C25A1.15 PE=4 SV=1	1	1	1	13.2	10.636	91	13.2	0	4878800	0
Q9XW17	CAEEL Cytokinesis, Apoptosis, RNA-associated	car-1	tr|Q9XW17|Q9XW17_CAEEL Cytokinesis, Apoptosis, RNA-associated OS=Caenorhabditis elegans OX=6239 GN=car-1 PE=1 SV=1	1	1	1	5	37.61	340	5	5	20242000	12083000
Q9XW20	CAEEL Uncharacterized protein	CELE_Y18D10A.11	tr|Q9XW20|Q9XW20_CAEEL Uncharacterized protein OS=Caenorhabditis elegans OX=6239 GN=CELE_Y18D10A.11 PE=1 SV=1	1	1	1	3.6	27.963	248	3.6	0	49182000	0
Q9XWD1	CAEEL Fatty Acid CoA Synthetase family	acs-5	tr|Q9XWD1|Q9XWD1_CAEEL Fatty Acid CoA Synthetase family OS=Caenorhabditis elegans OX=6239 GN=acs-5 PE=1 SV=1	1	1	1	1.6	75.759	687	1.6	0	5591500	0
Q9XWM1	CAEEL Ig-like domain-containing protein	oig-2	tr|Q9XWM1|Q9XWM1_CAEEL Ig-like domain-containing protein OS=Caenorhabditis elegans OX=6239 GN=oig-2 PE=1 SV=1	1	1	1	10.2	12.182	108	10.2	0	38437000	0
Q9XWP1	CAEEL Uncharacterized protein	CELE_Y43F8C.7	tr|Q9XWP1|Q9XWP1_CAEEL Uncharacterized protein OS=Caenorhabditis elegans OX=6239 GN=CELE_Y43F8C.7 PE=1 SV=1	1	1	1	5.5	26.331	236	5.5	0	5847500	0
Q9XWS4	CAEEL Ribosomal_L7Ae domain-containing protein	rpl-30	tr|Q9XWS4|Q9XWS4_CAEEL Ribosomal_L7Ae domain-containing protein OS=Caenorhabditis elegans OX=6239 GN=rpl-30 PE=1 SV=2	1	1	1	7	12.437	115	7	7	57590000	52532000
Q9XWU2	CAEEL Protein SUP-1	sup-1	sp|Q9XWU2|SUP1_CAEEL Protein SUP-1 OS=Caenorhabditis elegans OX=6239 GN=sup-1 PE=1 SV=1	1	1	1	9.7	11.31	103	9.7	0	72235000	0
Q9XWU9	CAEEL Uncharacterized protein	CELE_Y37D8A.19	tr|Q9XWU9|Q9XWU9_CAEEL Uncharacterized protein OS=Caenorhabditis elegans OX=6239 GN=CELE_Y37D8A.19 PE=1 SV=1	1	1	1	10.9	10.302	101	10.9	10.9	8346000	23072000
Q9XWZ2	CAEEL Acyl-CoA dehydrogenase family member 11	acdh-11	sp|Q9XWZ2|ACD11_CAEEL Acyl-CoA dehydrogenase family member 11 OS=Caenorhabditis elegans OX=6239 GN=acdh-11 PE=1 SV=1	1	1	1	1.8	68.291	617	1.8	0	13806000	0
Q9XXU9	CAEEL V-type proton ATPase subunit C	vha-11	sp|Q9XXU9|VATC_CAEEL V-type proton ATPase subunit C OS=Caenorhabditis elegans OX=6239 GN=vha-11 PE=2 SV=1	1	1	1	2.6	43.458	384	2.6	0	2045800	0
Q9XZI6	CAEEL Phosphatidylinositol-binding clathrin assembly protein unc-11	unc-11	sp|Q9XZI6|PICAL_CAEEL Phosphatidylinositol-binding clathrin assembly protein unc-11 OS=Caenorhabditis elegans OX=6239 GN=unc-11 PE=1 SV=1	1	1	1	1.5	64.063	586	1.5	0	0	0
Q9Y041	CAEEL Homogentisate 1,2-dioxygenase	hgo-1	sp|Q9Y041|HGD_CAEEL Homogentisate 1,2-dioxygenase OS=Caenorhabditis elegans OX=6239 GN=hgo-1 PE=2 SV=2	1	1	1	3.2	49.238	437	3.2	0	17465000	0
W6RQZ3	CAEEL Nitrogen Permease Regulator Like homolog	nprl-2	tr|W6RQZ3|W6RQZ3_CAEEL Nitrogen Permease Regulator Like homolog OS=Caenorhabditis elegans OX=6239 GN=nprl-2 PE=1 SV=2	1	1	1	2.2	51.808	451	2.2	0	5534300	0
X5MK34	CAEEL UBA domain-containing protein	spe-48	tr|X5MK34|X5MK34_CAEEL UBA domain-containing protein OS=Caenorhabditis elegans OX=6239 GN=spe-48 PE=1 SV=1	1	1	1	12	8.3617	75	12	0	201010000	0
P18947	CAEEL Vitellogenin-4	vit-4	sp|P18947|VIT4_CAEEL Vitellogenin-4 OS=Caenorhabditis elegans OX=6239 GN=vit-4 PE=1 SV=3	1	12	0	6.8	186.31	1603	6.8	1.7	14249000	51995000

## Sheet: HSP_FLAG-HSP
Protein IDs	Protein names	Gene names	Fasta headers	Number of proteins	Peptides	Unique peptides	Sequence coverage [%]	Mol. weight [kDa]	Sequence length	Sequence coverage R1528-HSP [%]	Sequence coverage R1528-HSP-FLAG [%]	LFQ intensity R1528-HSP	LFQ intensity R1528-HSP-FLAG
P34696;Q21062	CAEEL Heat shock protein Hsp-16.1/Hsp-16.11	hsp-16.1	sp|P34696|HSP11_CAEEL Heat shock protein Hsp-16.1/Hsp-16.11 OS=Caenorhabditis elegans OX=6239 GN=hsp-16.1 PE=2 SV=1;tr|Q21062|Q21062_CAEEL Heat shock protein 16-1 OS=Caenorhabditis elegans OX=6239 PE=3 SV=1	2	2	2	18.6	16.253	145	0	18.6	0	63691000
P91303	CAEEL Probable V-type proton ATPase subunit G	vha-10	sp|P91303|VATG_CAEEL Probable V-type proton ATPase subunit G OS=Caenorhabditis elegans OX=6239 GN=vha-10 PE=3 SV=1	1	2	2	15.1	14.485	126	0	15.1	0	170530000
G5EGT7	CAEEL Eukaryotic translation initiation factor eIF5B	iffb-1	tr|G5EGT7|G5EGT7_CAEEL Eukaryotic translation initiation factor eIF5B OS=Caenorhabditis elegans OX=6239 GN=iffb-1 PE=1 SV=1	1	1	1	1	120.42	1074	0	1	0	0
Q27485;J7S164;J7SA65;P09588	CAEEL Histone H2A	his-35	tr|Q27485|Q27485_CAEEL Histone H2A OS=Caenorhabditis elegans OX=6239 GN=his-35 PE=3 SV=1;tr|J7S164|J7S164_CAEEL Histone H2A OS=Caenorhabditis elegans OX=6239 GN=his-57 PE=3 SV=1;tr|J7SA65|J7SA65_CAEEL Histone H2A OS=Caenorhabditis elegans OX=6239 GN=his-57	4	1	1	5.5	13.418	127	0	5.5	0	268570000
O45769	CAEEL F-box domain-containing protein	CELE_T10C6.7	tr|O45769|O45769_CAEEL F-box domain-containing protein OS=Caenorhabditis elegans OX=6239 GN=CELE_T10C6.7 PE=4 SV=2	1	1	1	3.8	37.523	317	0	3.8	0	0
O61792	CAEEL MPN domain-containing protein	rpn-8	tr|O61792|O61792_CAEEL MPN domain-containing protein OS=Caenorhabditis elegans OX=6239 GN=rpn-8 PE=1 SV=1	1	1	1	2.5	40.687	362	0	2.5	0	0
P46582	CAEEL Protein sumv-1	sumv-1	sp|P46582|SUMV1_CAEEL Protein sumv-1 OS=Caenorhabditis elegans OX=6239 GN=sumv-1 PE=2 SV=2	1	1	1	1.1	112.21	1024	0	1.1	0	0
P90889	CAEEL Uncharacterized protein	CELE_F55H12.4	tr|P90889|P90889_CAEEL Uncharacterized protein OS=Caenorhabditis elegans OX=6239 GN=CELE_F55H12.4 PE=1 SV=1	1	1	1	3.8	22.043	208	0	3.8	0	86366000
Q11067	CAEEL Protein disulfide-isomerase A6 homolog	pdi-6	sp|Q11067|PDIA6_CAEEL Protein disulfide-isomerase A6 homolog OS=Caenorhabditis elegans OX=6239 GN=pdi-6 PE=3 SV=1	1	1	1	3.4	47.727	440	0	3.4	0	19651000
Q18061	CAEEL Uncharacterized protein	C17C3.3	tr|Q18061|Q18061_CAEEL Uncharacterized protein OS=Caenorhabditis elegans OX=6239 GN=C17C3.3 PE=4 SV=2	1	1	1	3.5	35.904	316	0	3.5	0	0
Q18624	CAEEL SAND domain-containing protein	gmeb-3	tr|Q18624|Q18624_CAEEL SAND domain-containing protein OS=Caenorhabditis elegans OX=6239 GN=gmeb-3 PE=1 SV=2	1	1	1	6.6	42.769	376	0	6.6	0	34430000
Q20140	CAEEL Adenylate kinase isoenzyme 1	F38B2.4	sp|Q20140|KAD1_CAEEL Adenylate kinase isoenzyme 1 OS=Caenorhabditis elegans OX=6239 GN=F38B2.4 PE=2 SV=1	1	1	1	4.3	22.597	210	0	4.3	0	46574000
Q6EUU1;Q9XXU4	CAEEL G_PROTEIN_RECEP_F1_2 domain-containing protein	npr-10	tr|Q6EUU1|Q6EUU1_CAEEL G_PROTEIN_RECEP_F1_2 domain-containing protein OS=Caenorhabditis elegans OX=6239 GN=npr-10 PE=3 SV=1;tr|Q9XXU4|Q9XXU4_CAEEL G_PROTEIN_RECEP_F1_2 domain-containing protein OS=Caenorhabditis elegans OX=6239 GN=npr-10 PE=3 SV=1	2	1	1	3	40.576	362	0	3	0	0
V6CM05;Q9N4T5	CAEEL OTU domain-containing protein	otub-2	tr|V6CM05|V6CM05_CAEEL OTU domain-containing protein OS=Caenorhabditis elegans OX=6239 GN=otub-2 PE=4 SV=1;tr|Q9N4T5|Q9N4T5_CAEEL OTU domain-containing protein OS=Caenorhabditis elegans OX=6239 GN=otub-2 PE=4 SV=2	2	1	1	2.4	56.275	499	0	2.4	0	0
Q9XWS6	CAEEL Uncharacterized protein	CELE_Y62H9A.5	tr|Q9XWS6|Q9XWS6_CAEEL Uncharacterized protein OS=Caenorhabditis elegans OX=6239 GN=CELE_Y62H9A.5 PE=1 SV=2	1	1	1	4.2	18.496	165	0	4.2	0	79508000
