# Supplementary figures and images for: trim-21 promotes proteasomal degradation of CED-1 for apoptotic cell clearance in C. elegans
Source: eLife journal article supplement (doi:10.7554/elife.76436), 2022-08-05

Figure 1-figure supplement 1A


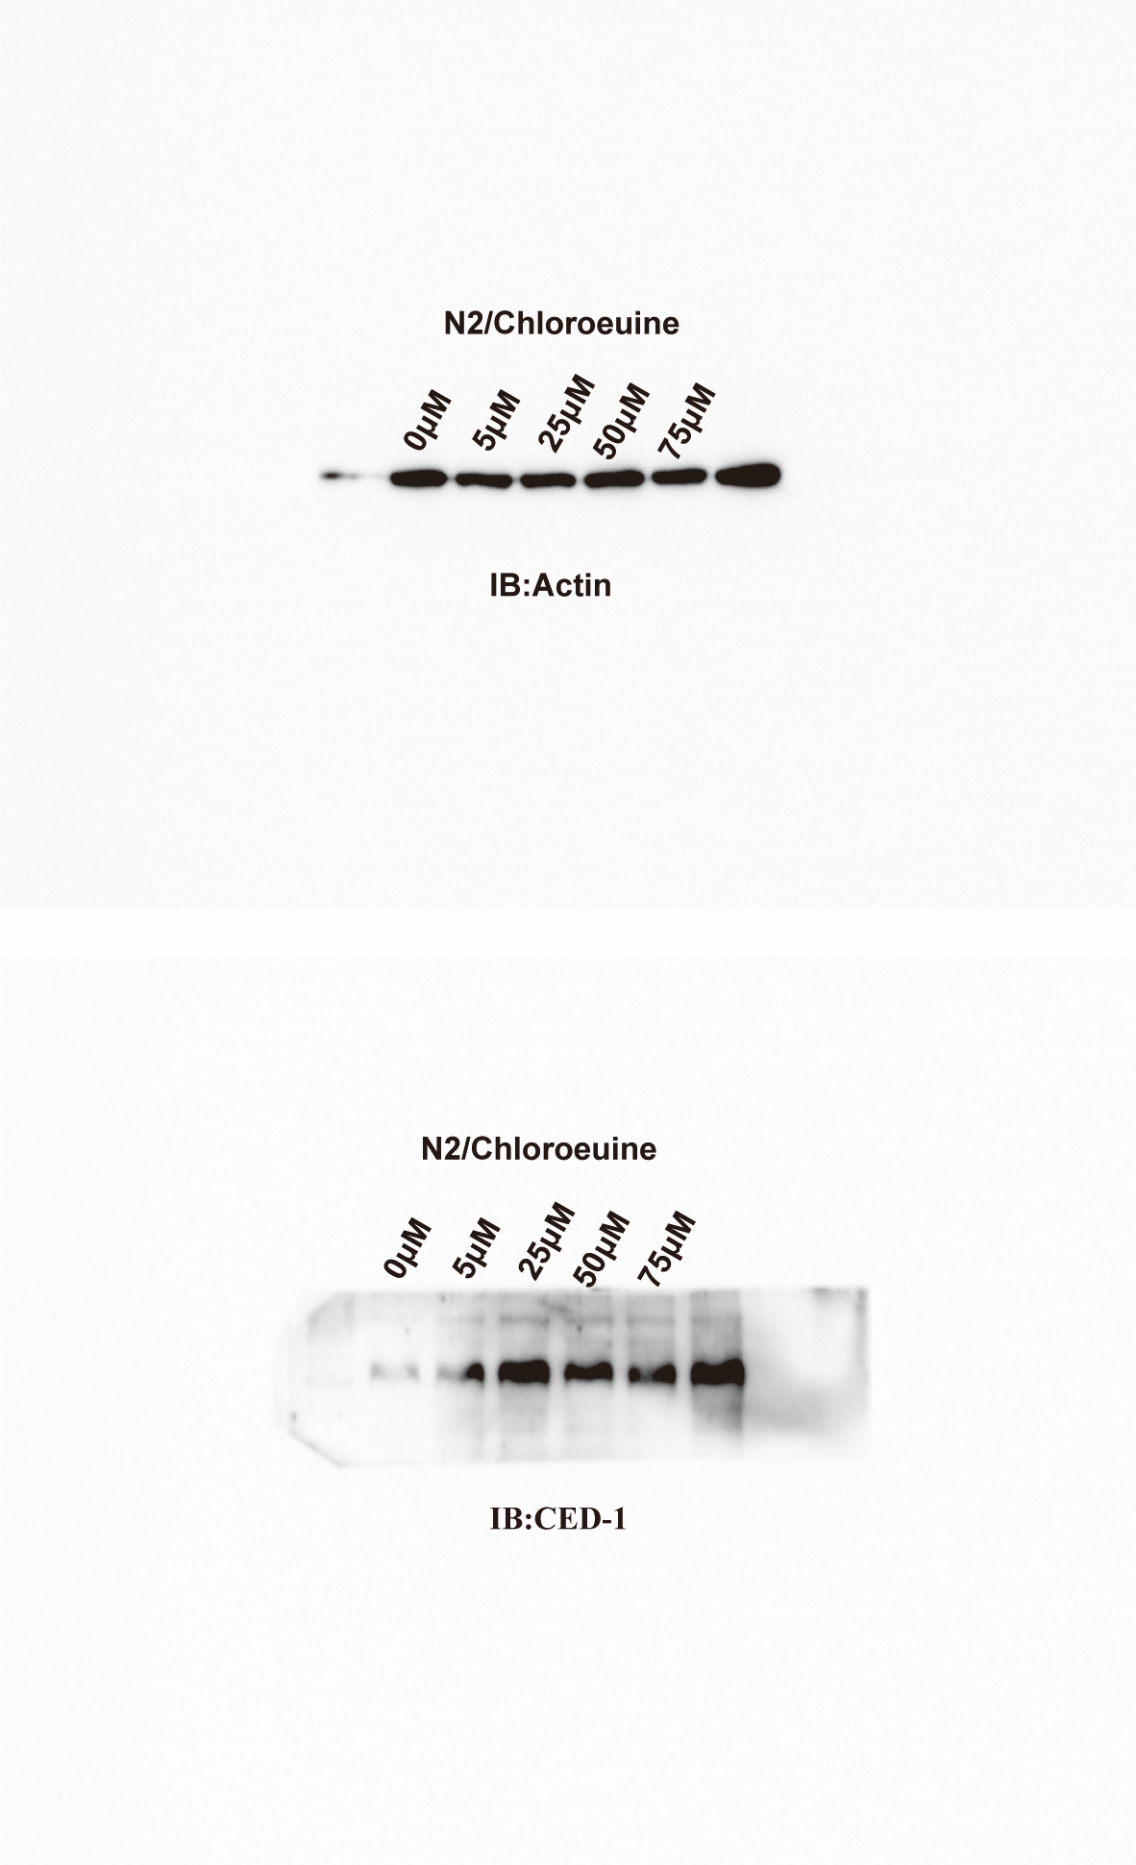


Figure 1-figure supplement 1B


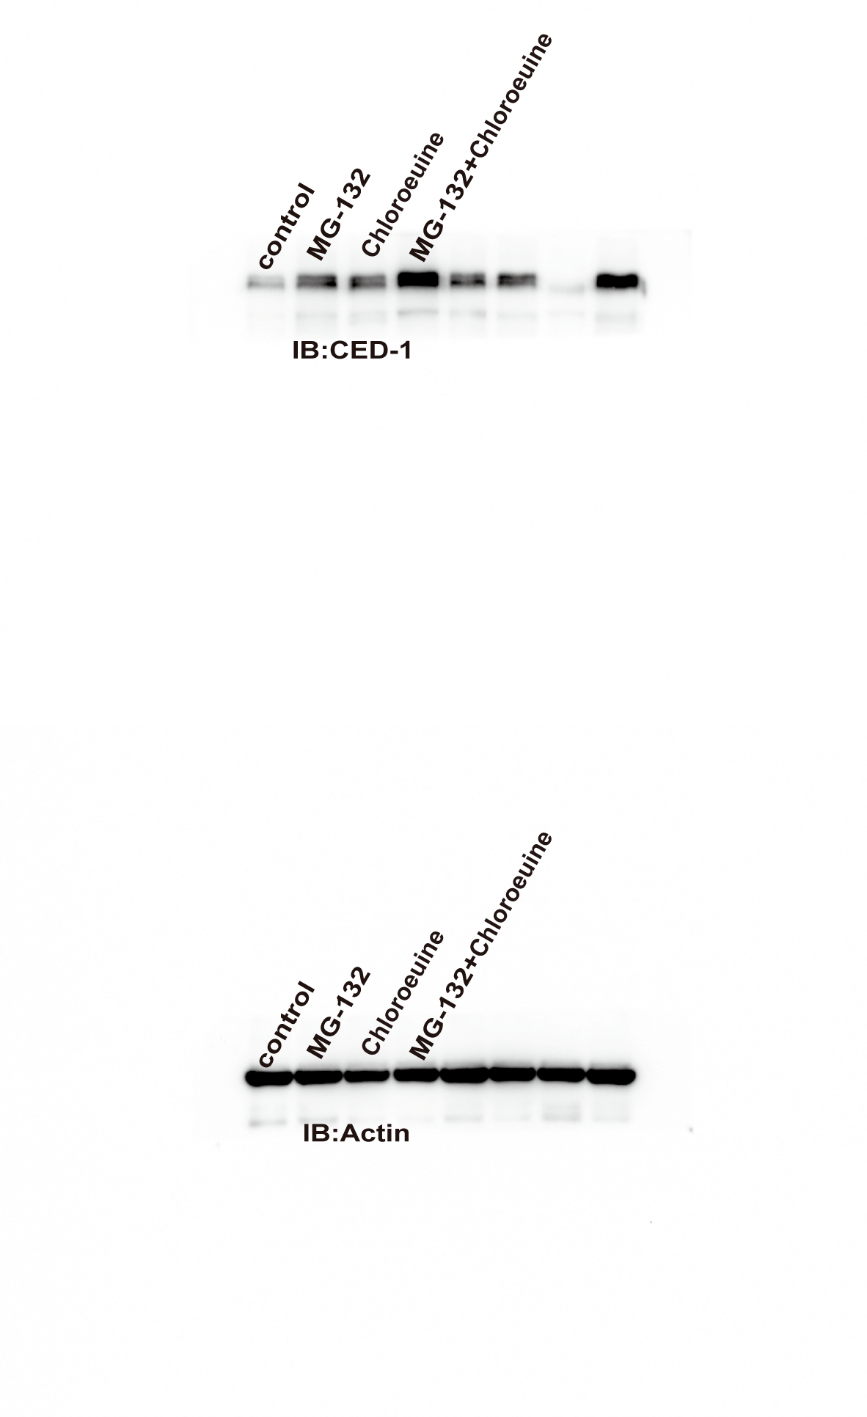


Figure 1-figure supplement 1I


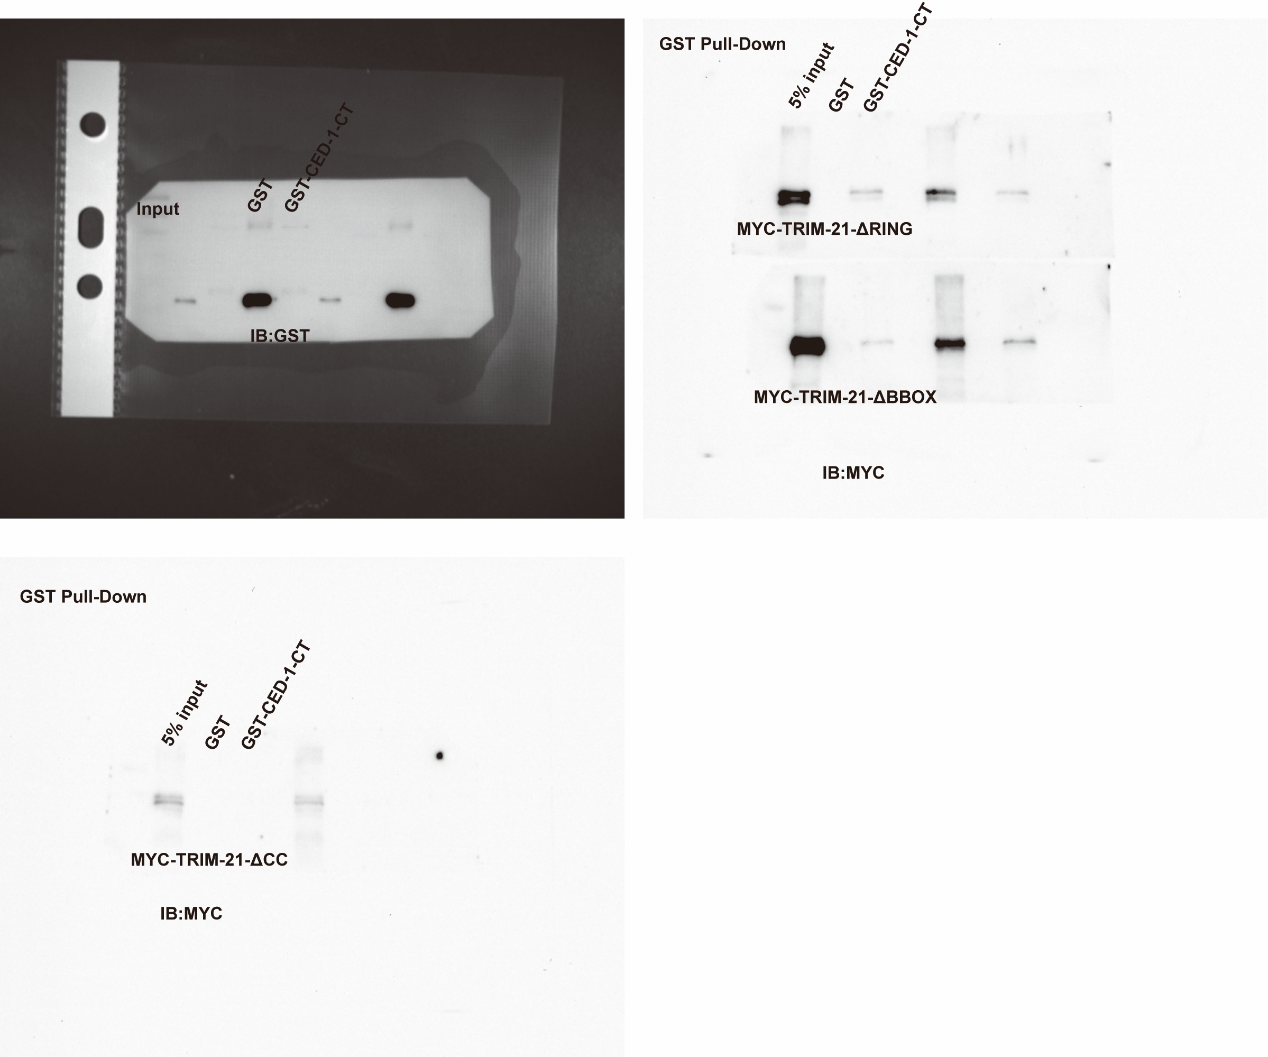

Supplement: fig1-figsupp1-data1 [file Figure 1-figure supplement 1 uncroppped blot with relevant bands.docx]

Figure 1-figure supplement 2D


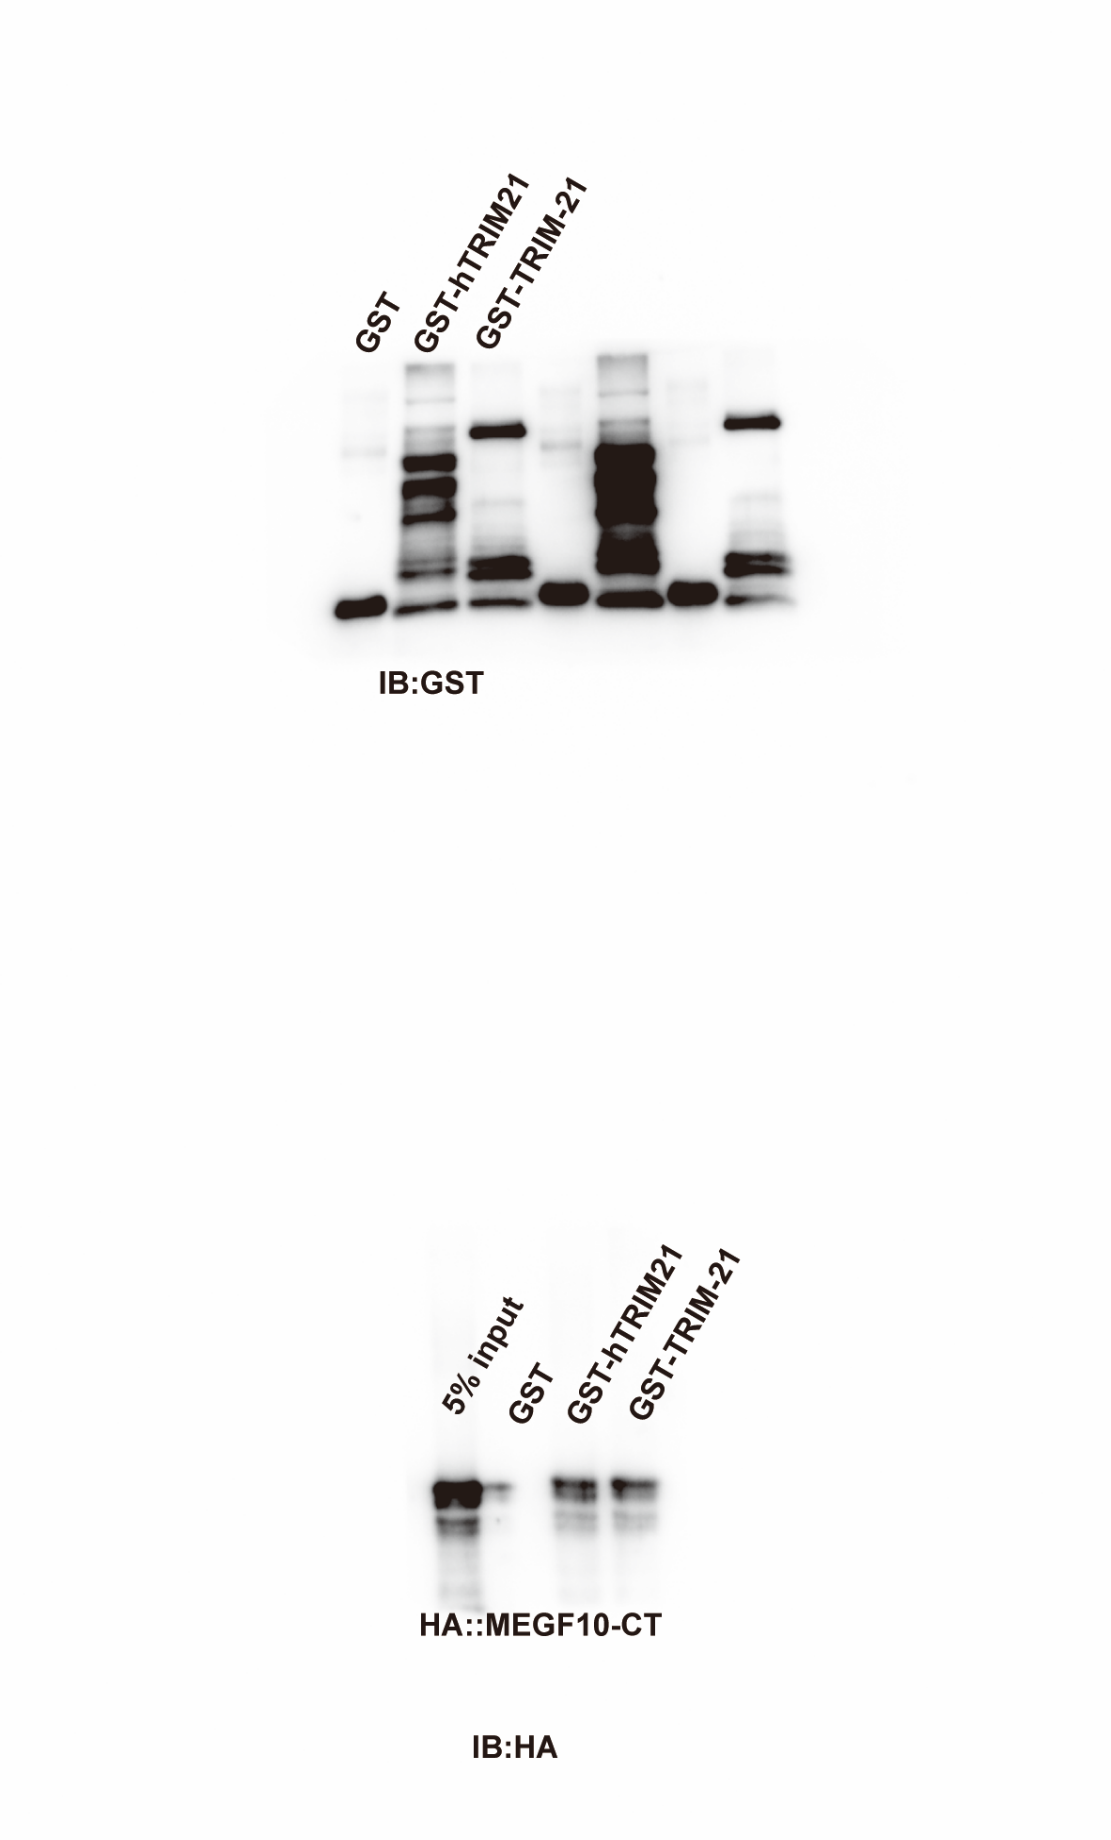


Figure 1-figure supplement 2E


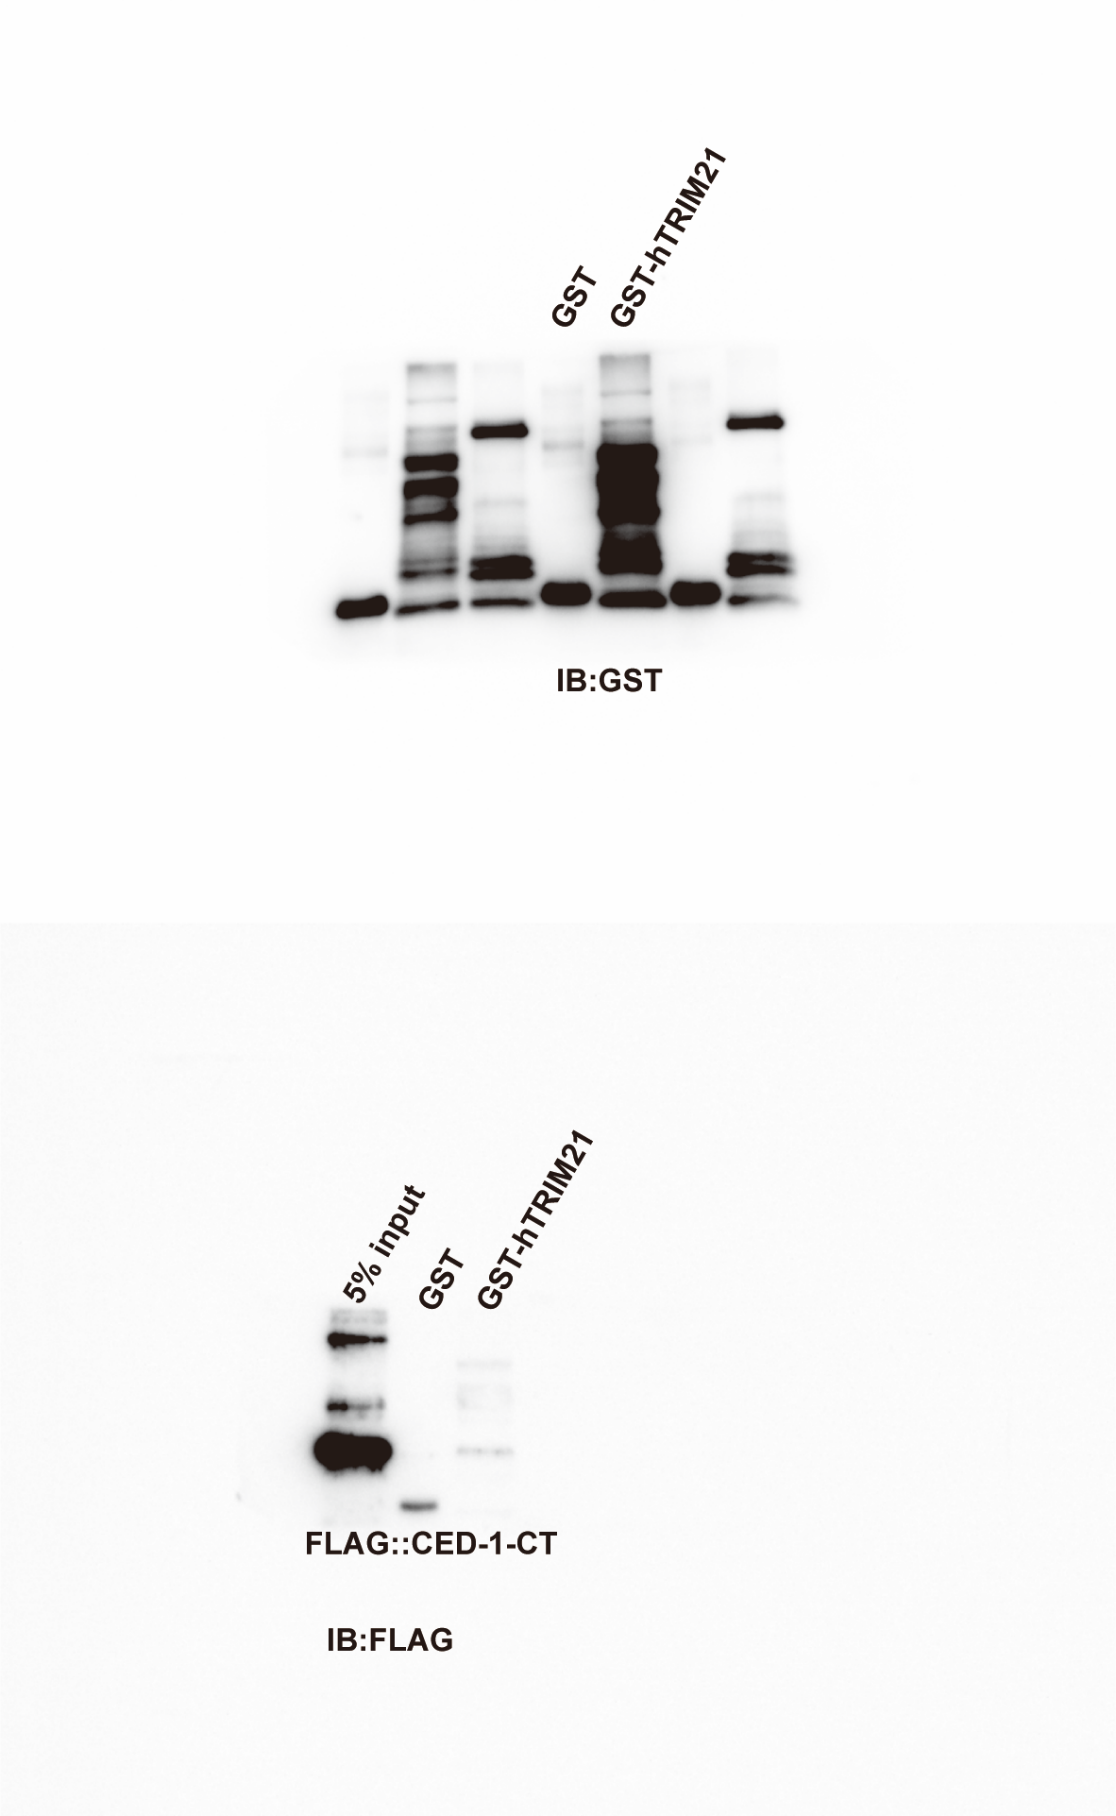

Supplement: fig1-figsupp2-data1 [file Figure 1-figure supplement 2 uncroppped blot with relevant bands.docx]

Figure 2B


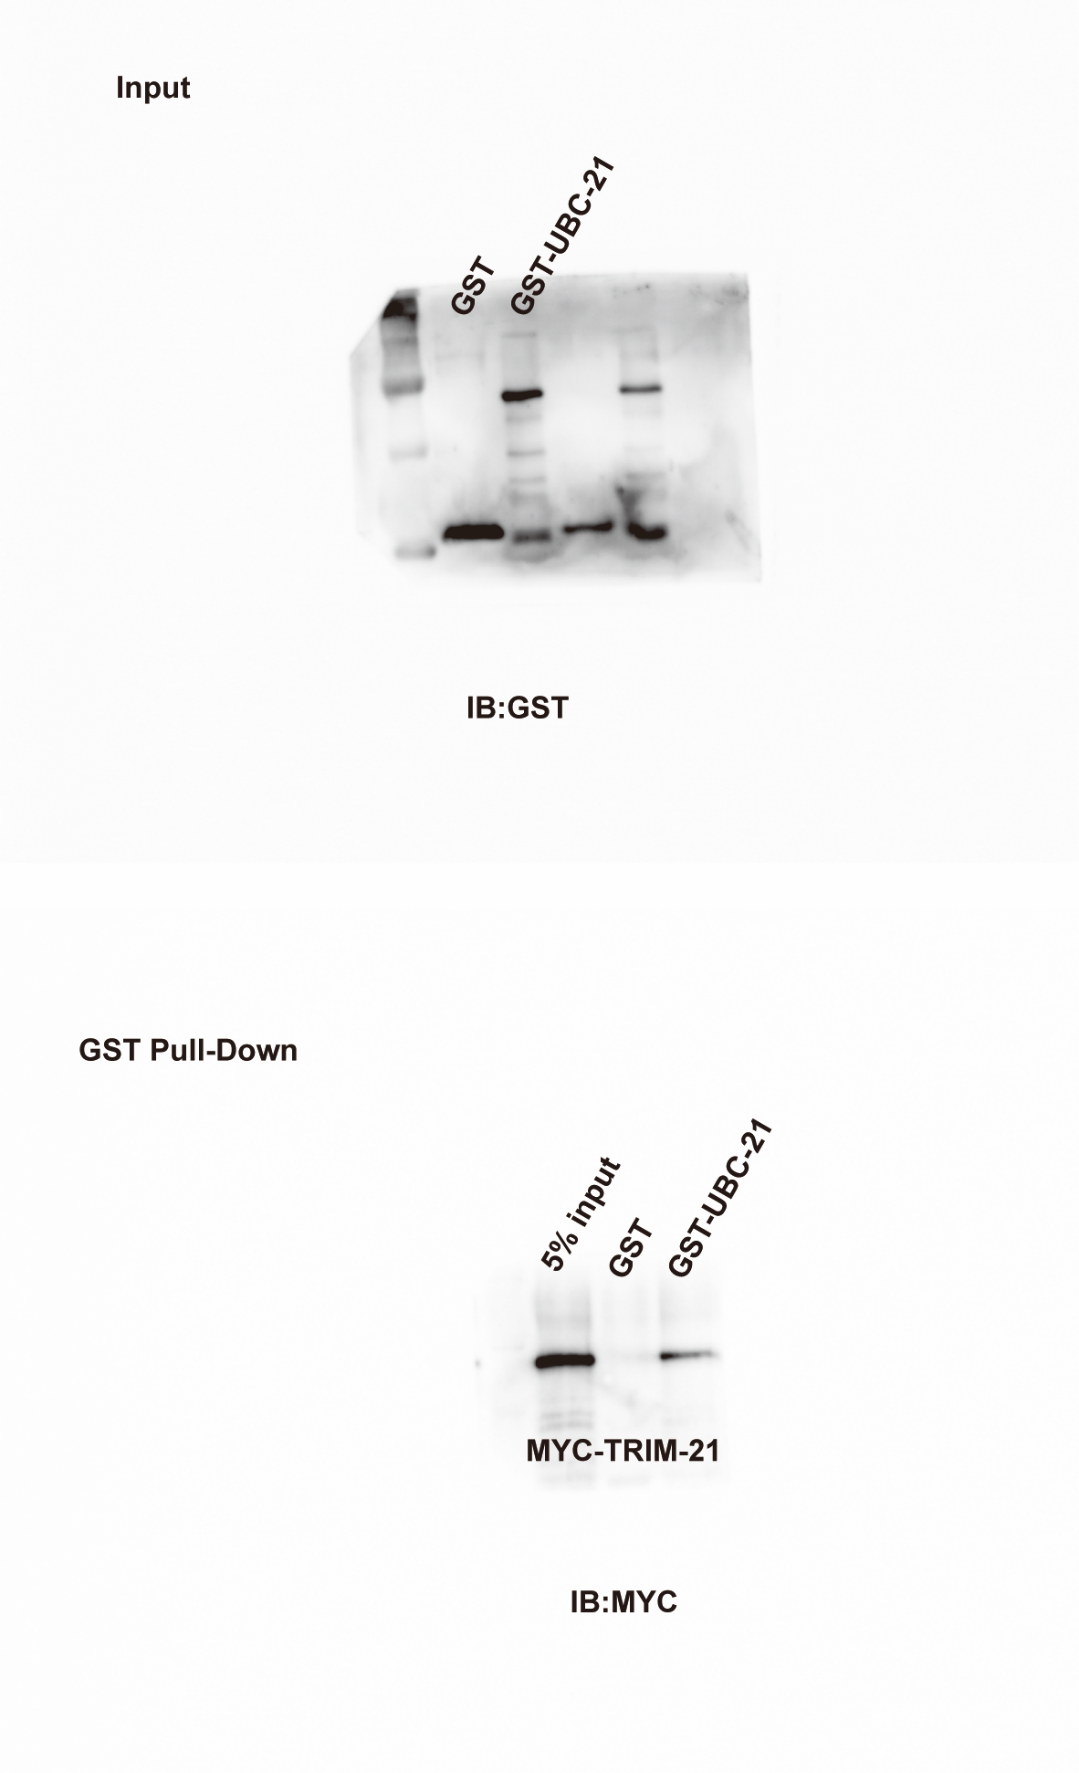


Figure 2E


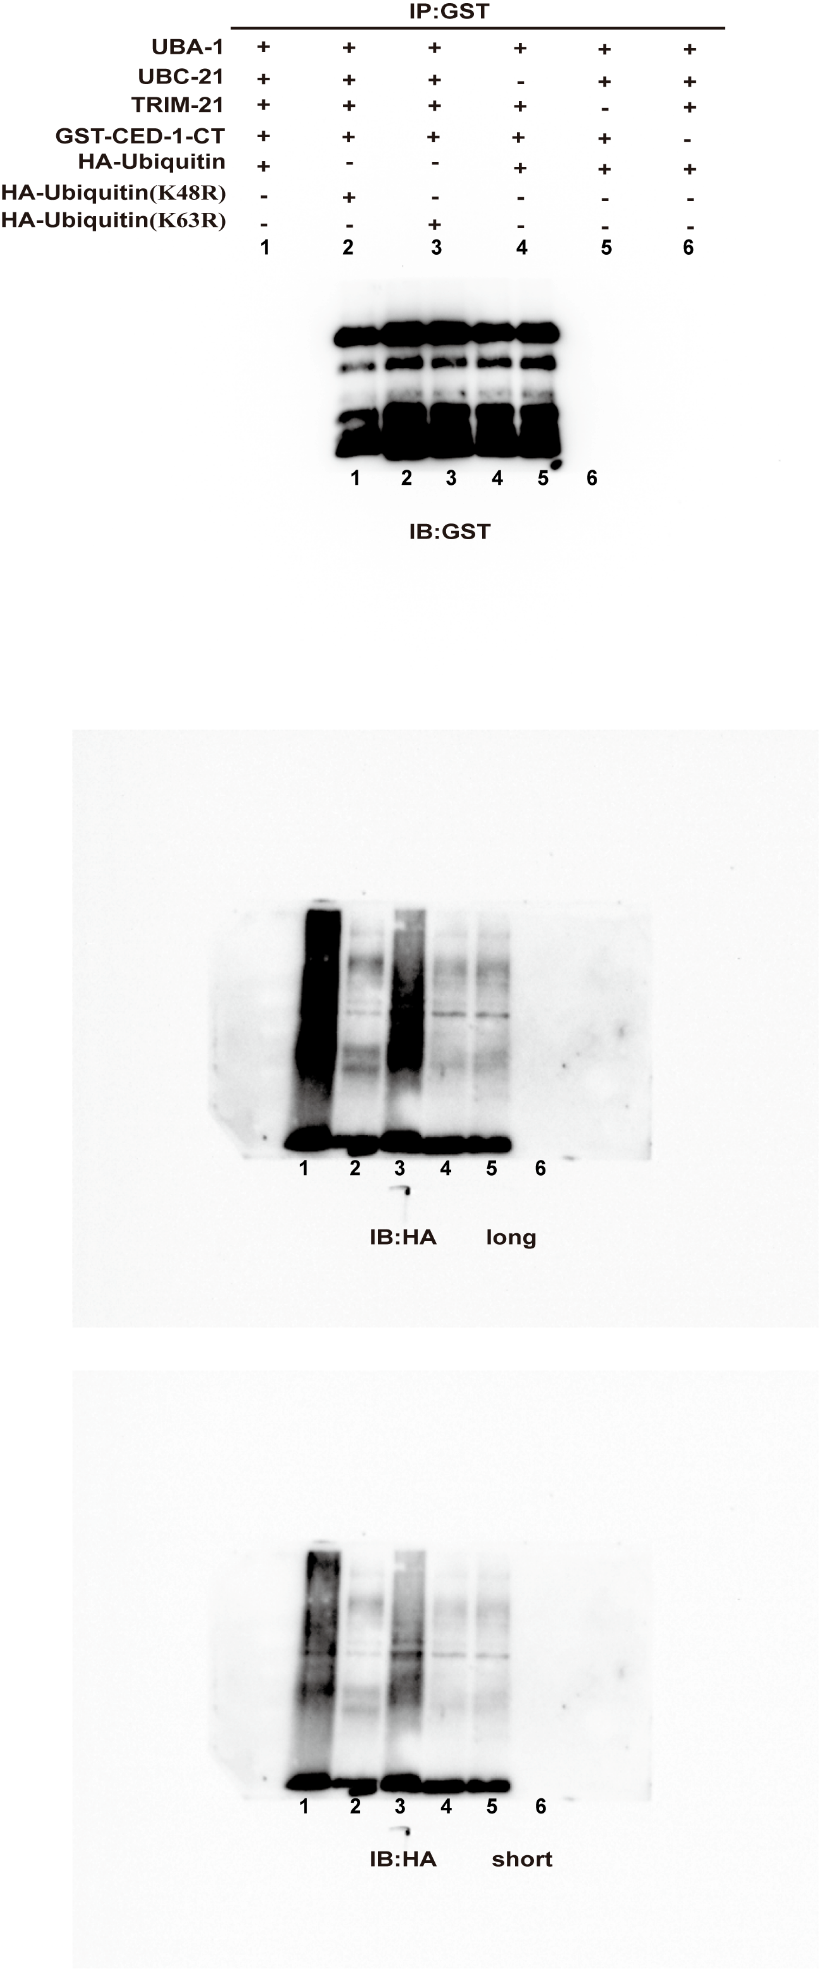


Figure 2F


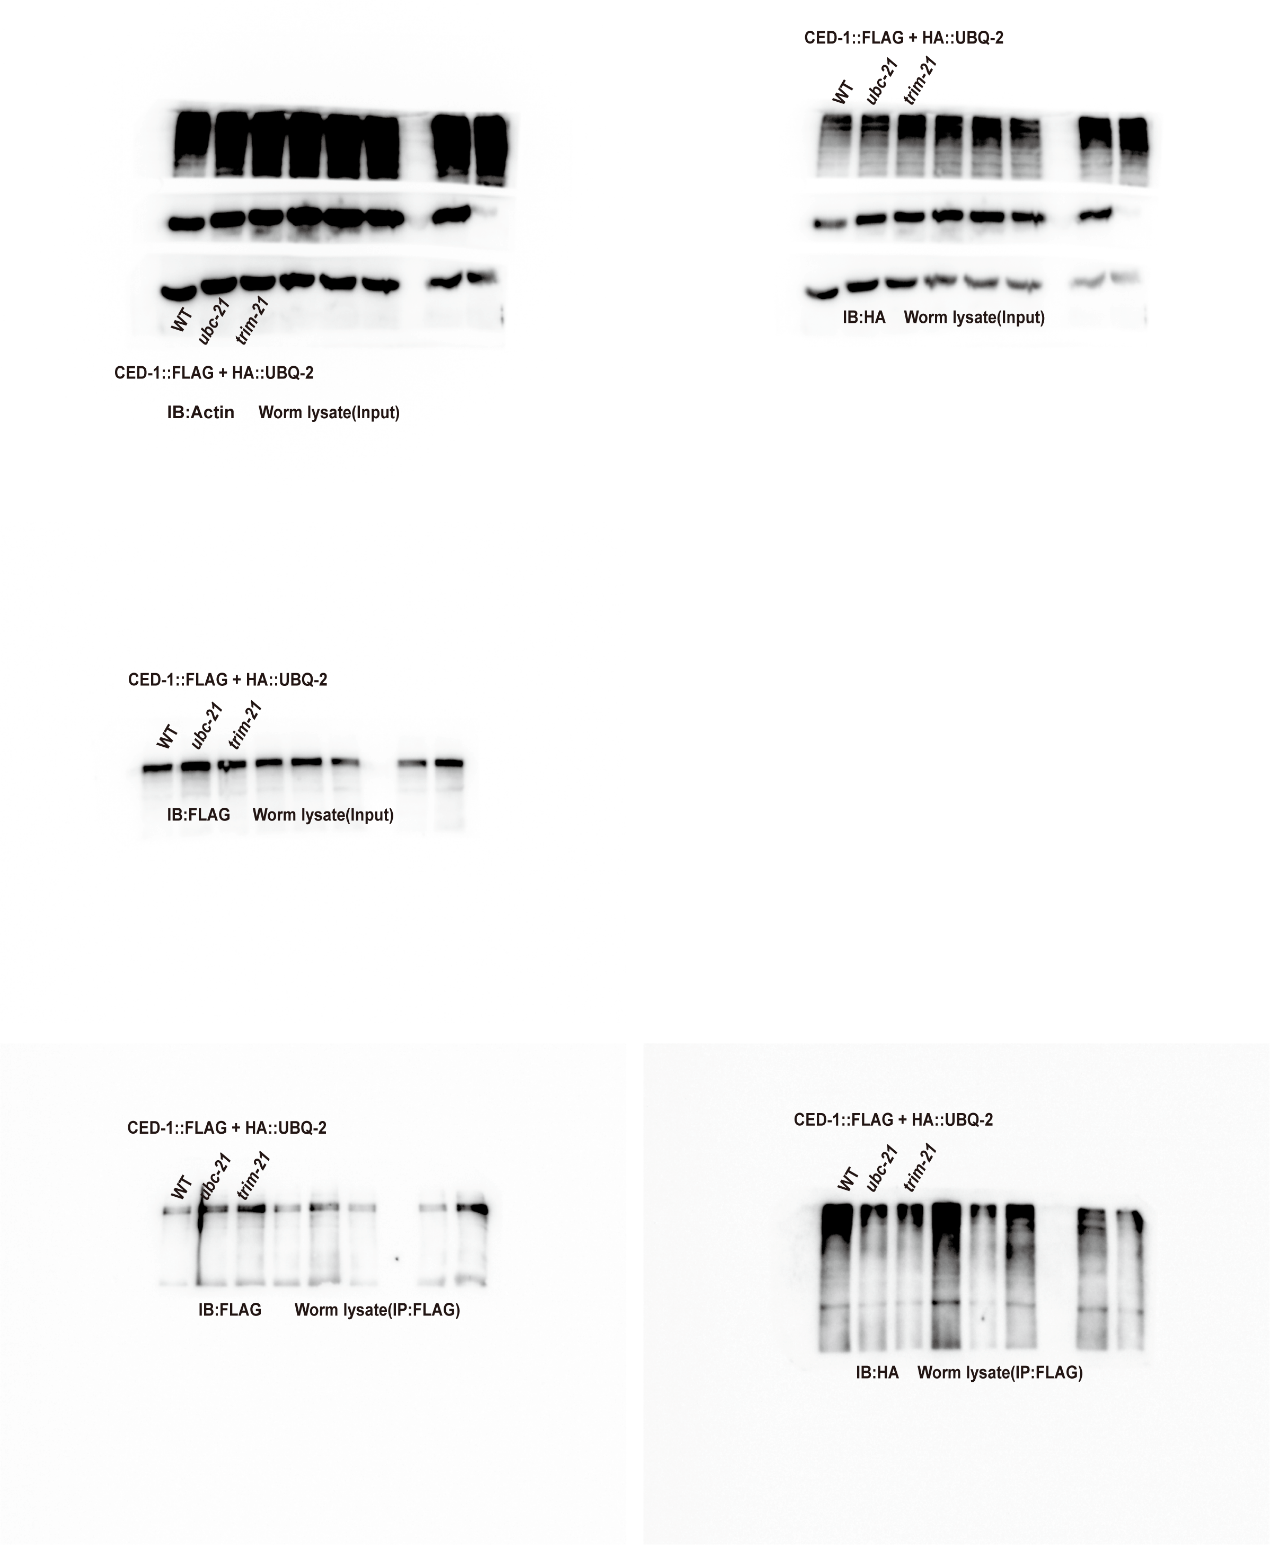


Figure 2G


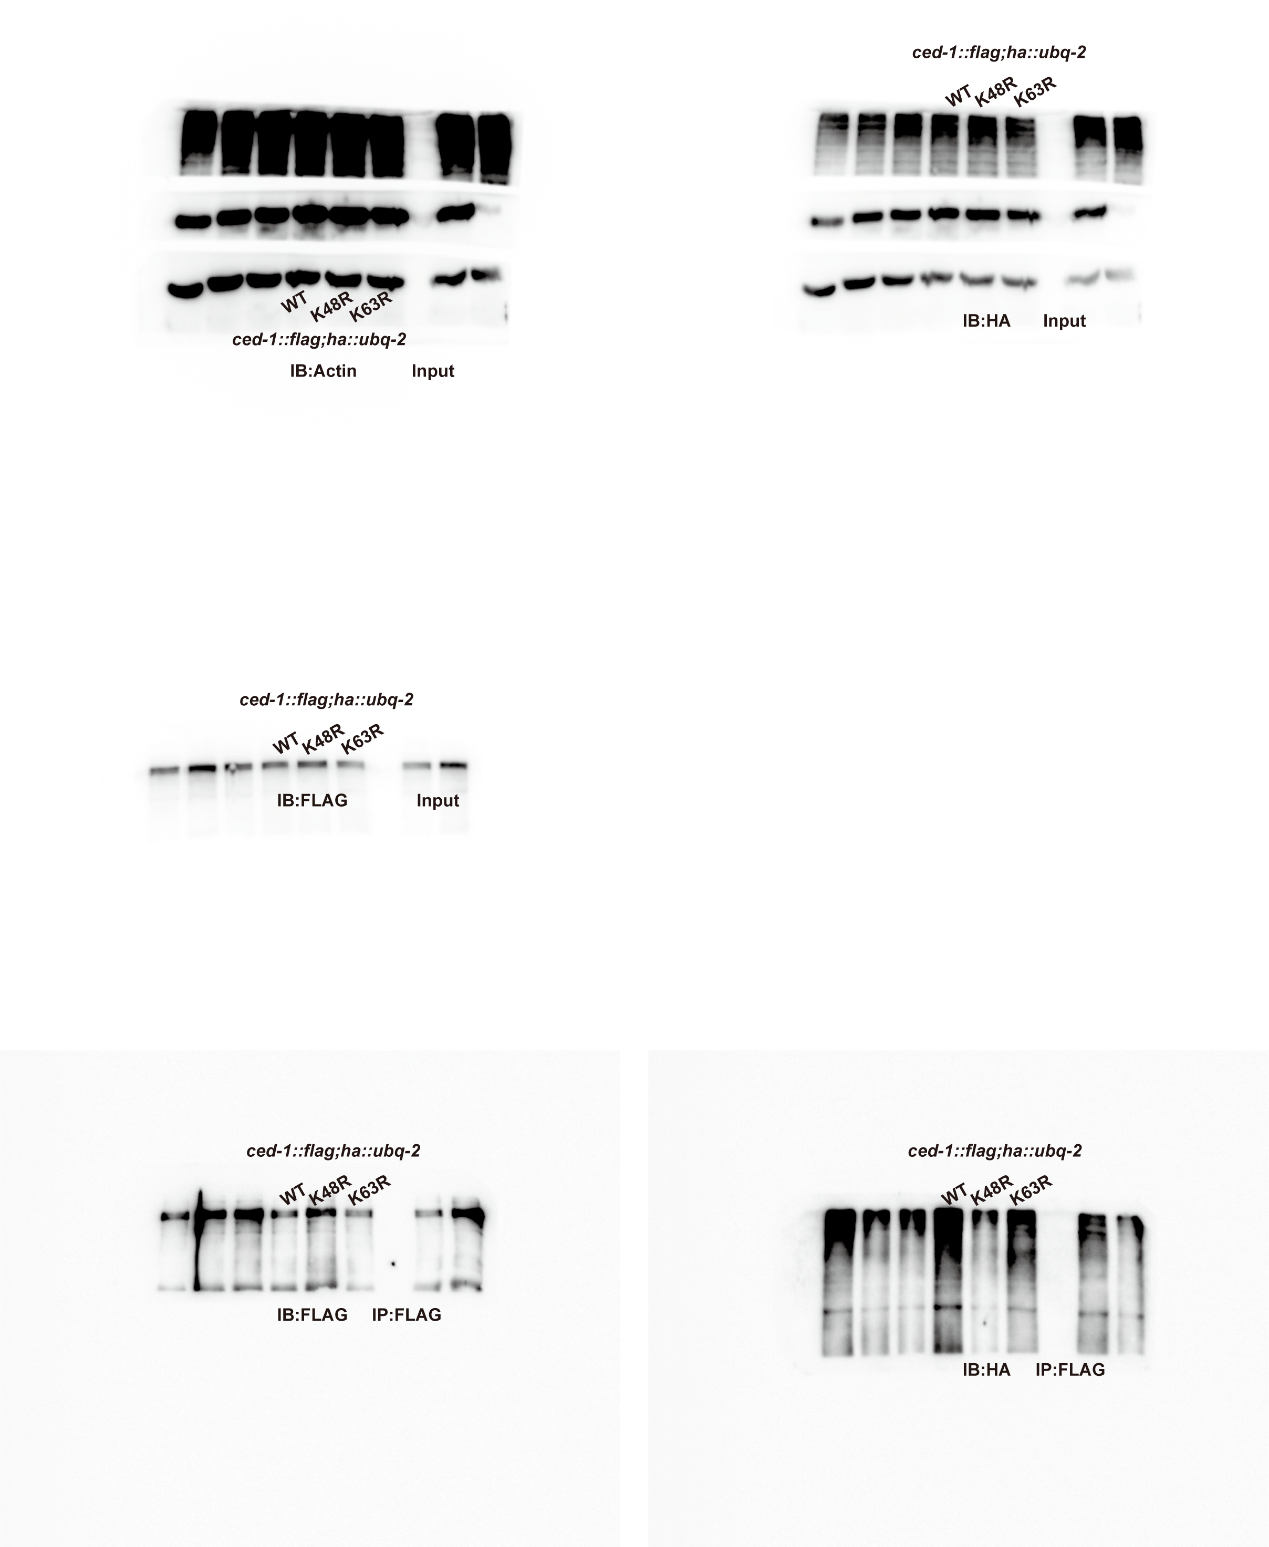


Figure 2I


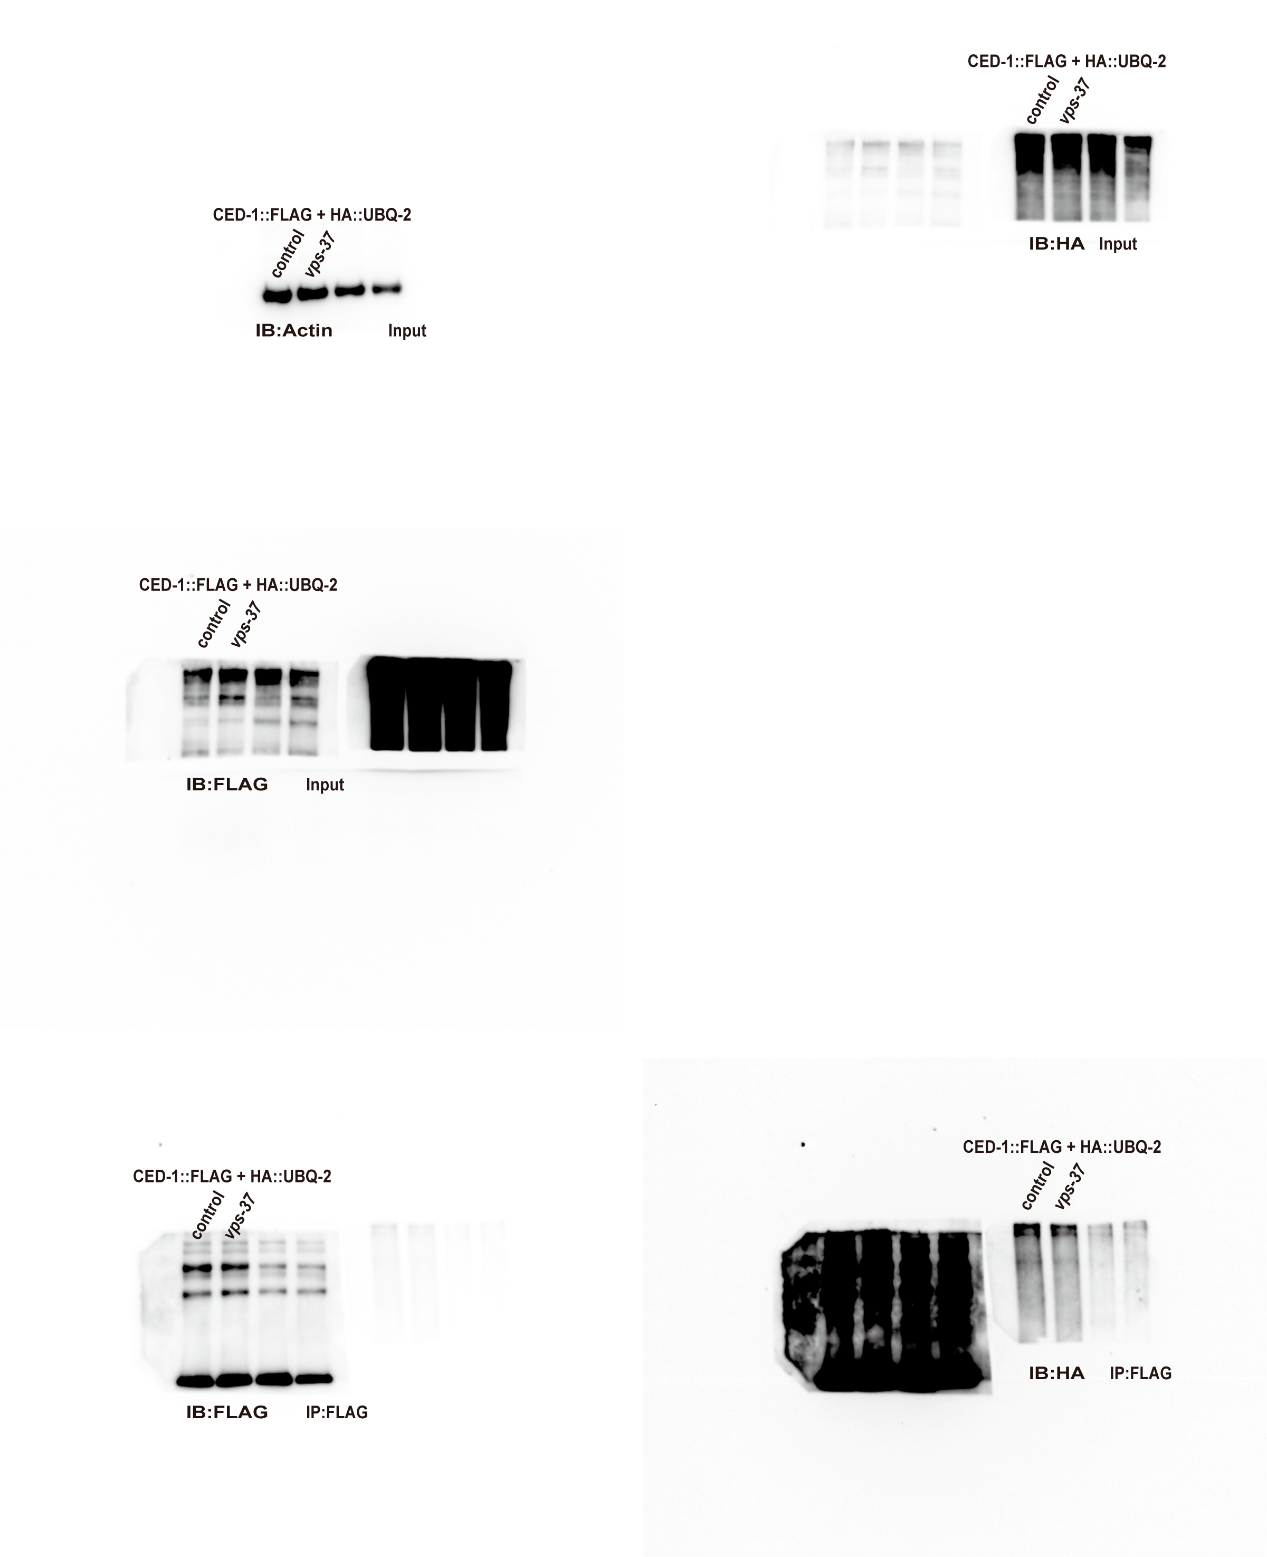

Supplement: fig2-data1 [file Figure 2 uncroppped blot with relevant bands.docx]

Figure 5-figure supplement 1B


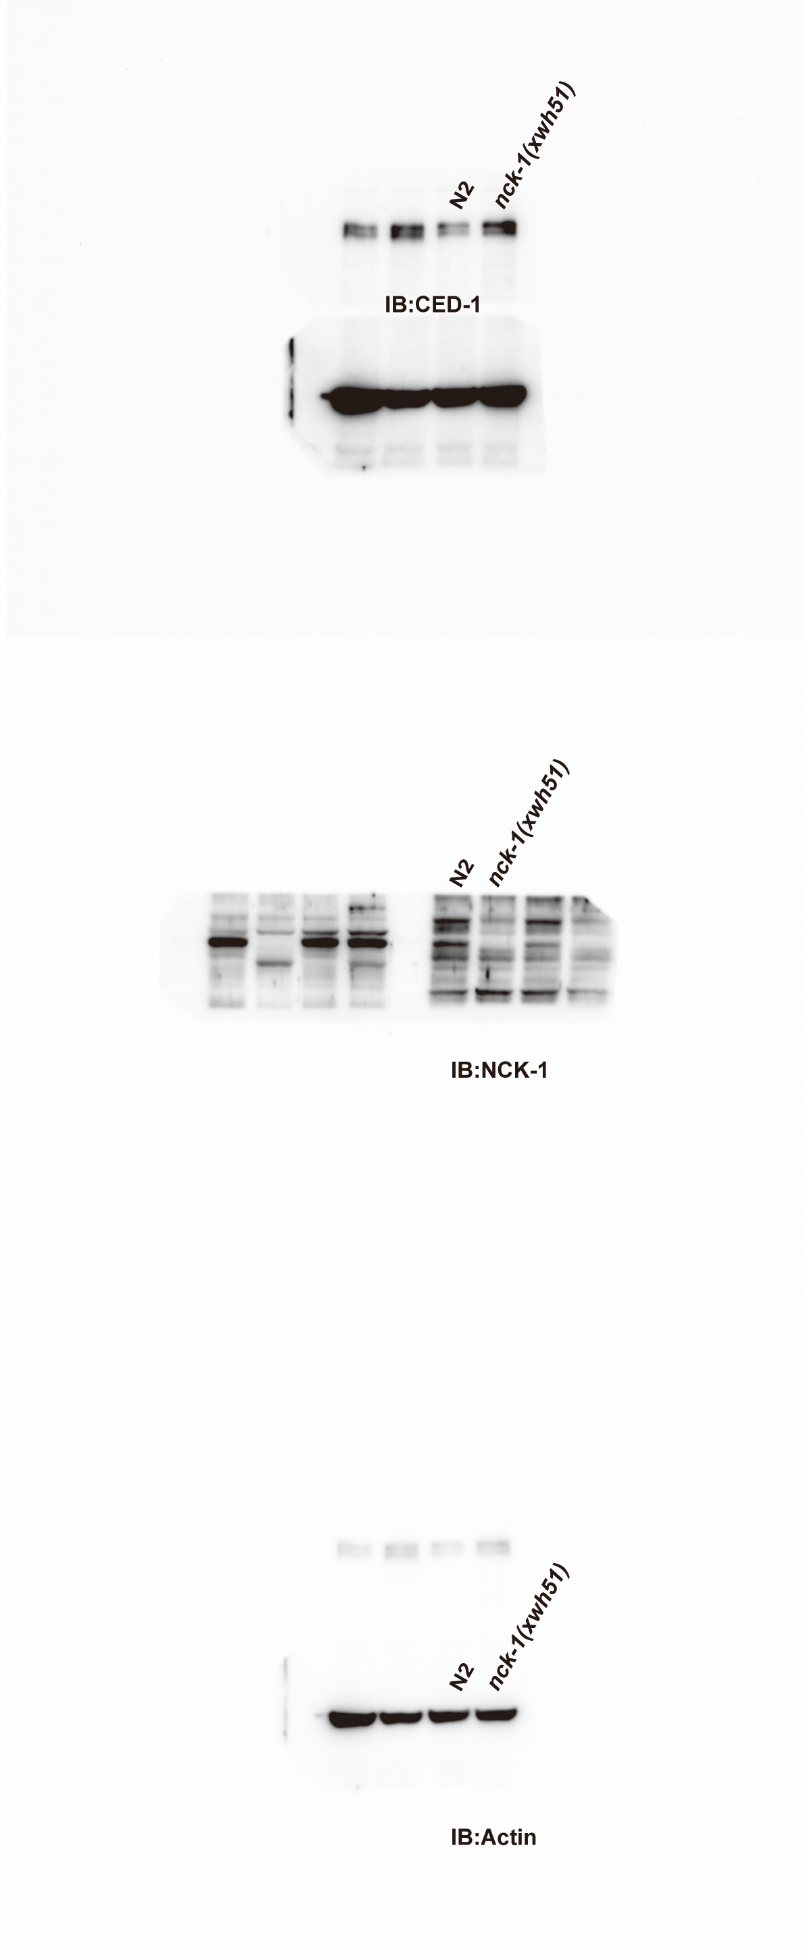


Figure 5-figure supplement 1D


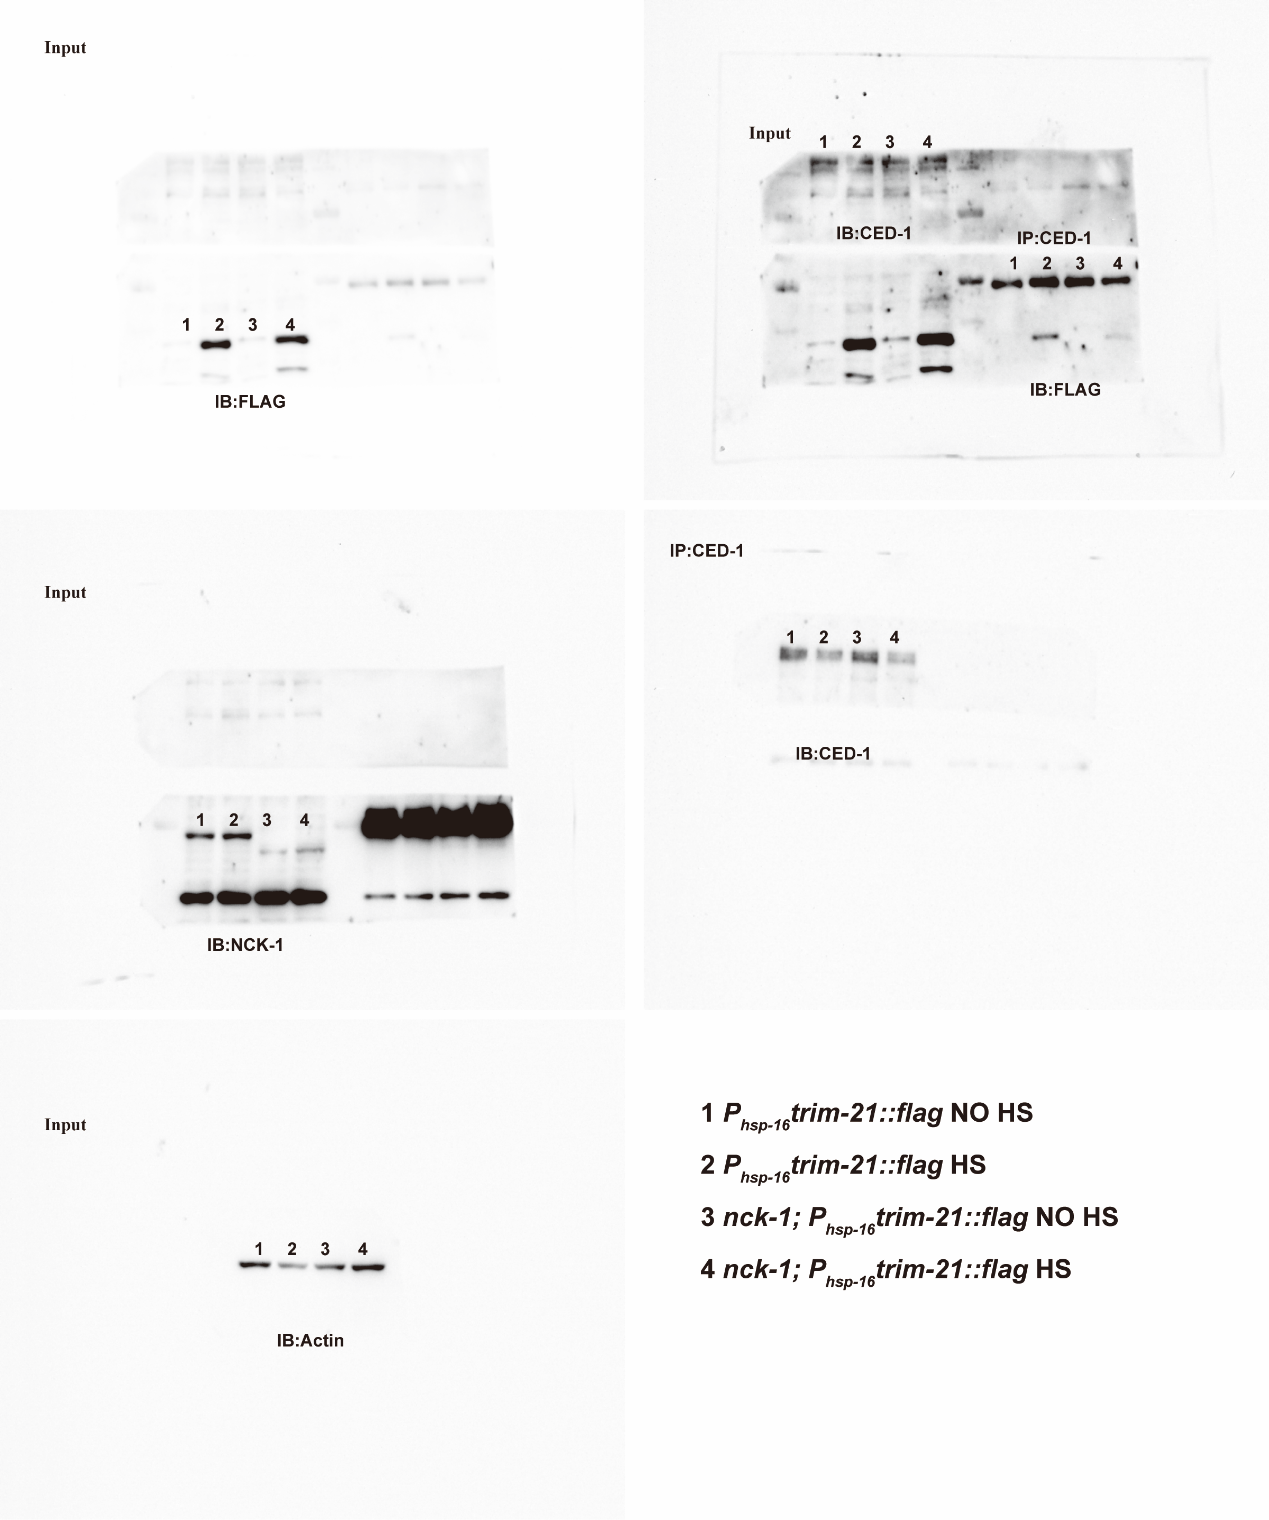


Figure 5-figure supplement 1F


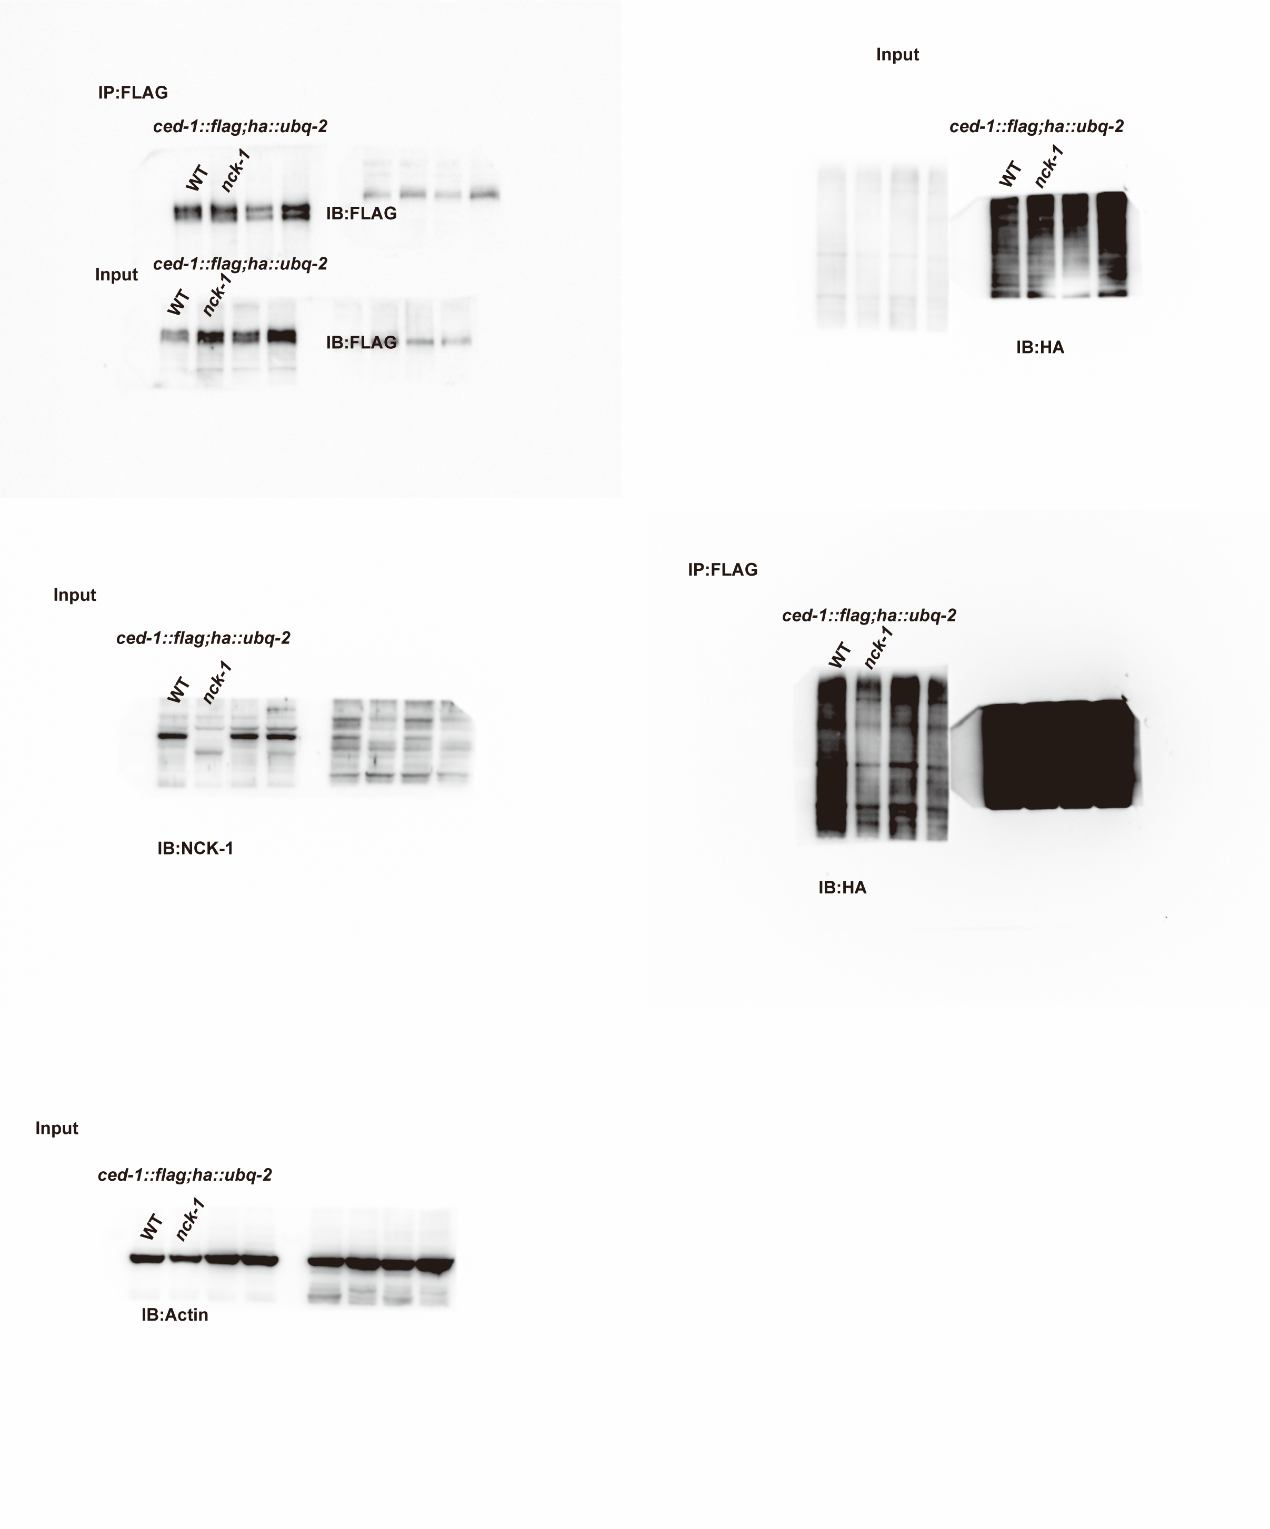

Supplement: fig5-figsupp1-data1 [file Figure 5-figure supplement 1 uncroppped blot with relevant bands.docx]

Figure 7A


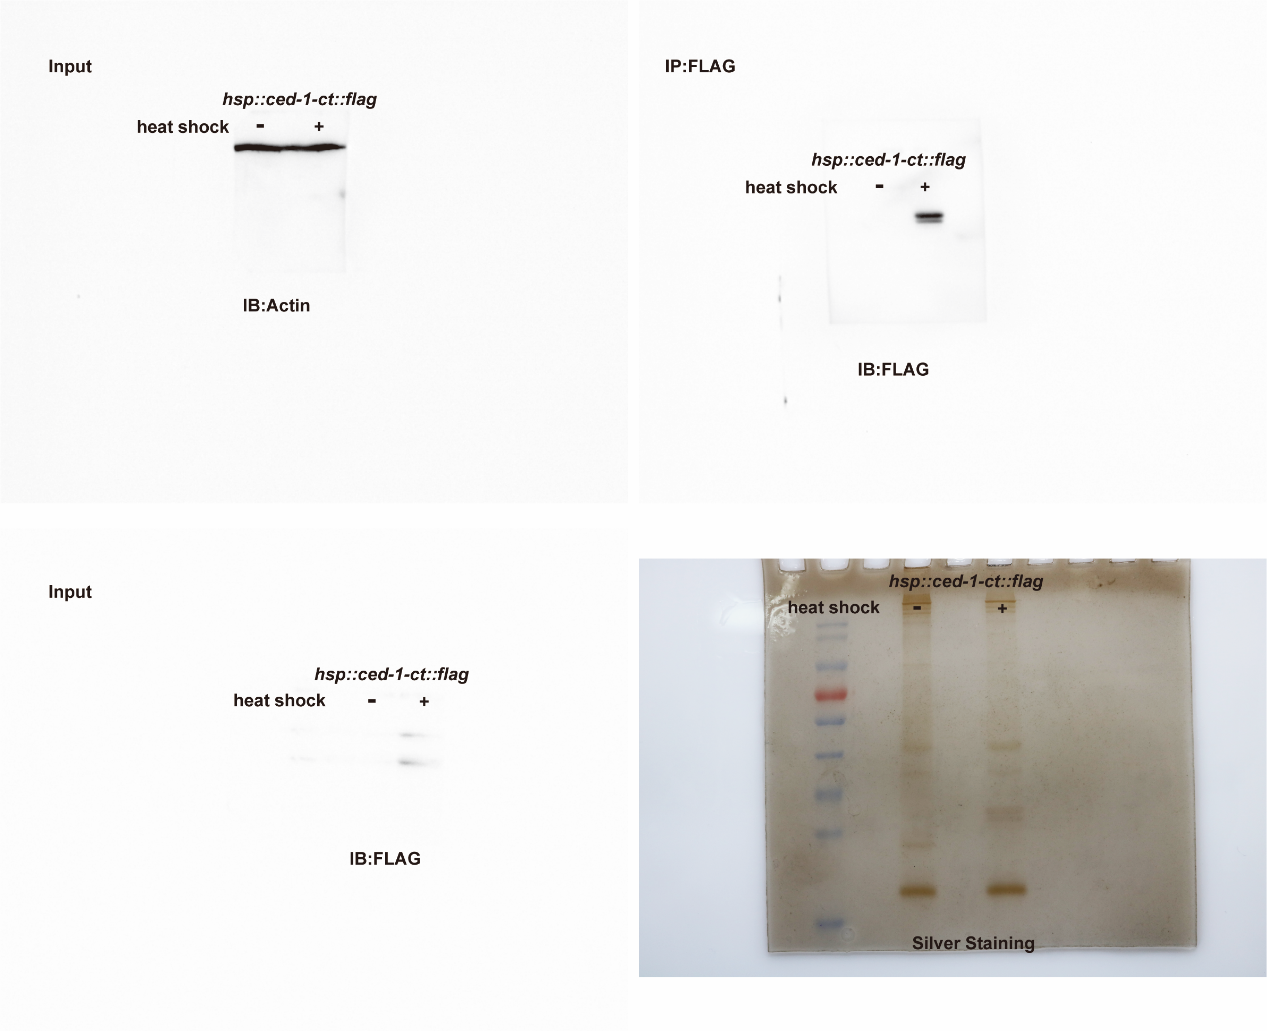


Figure 7C


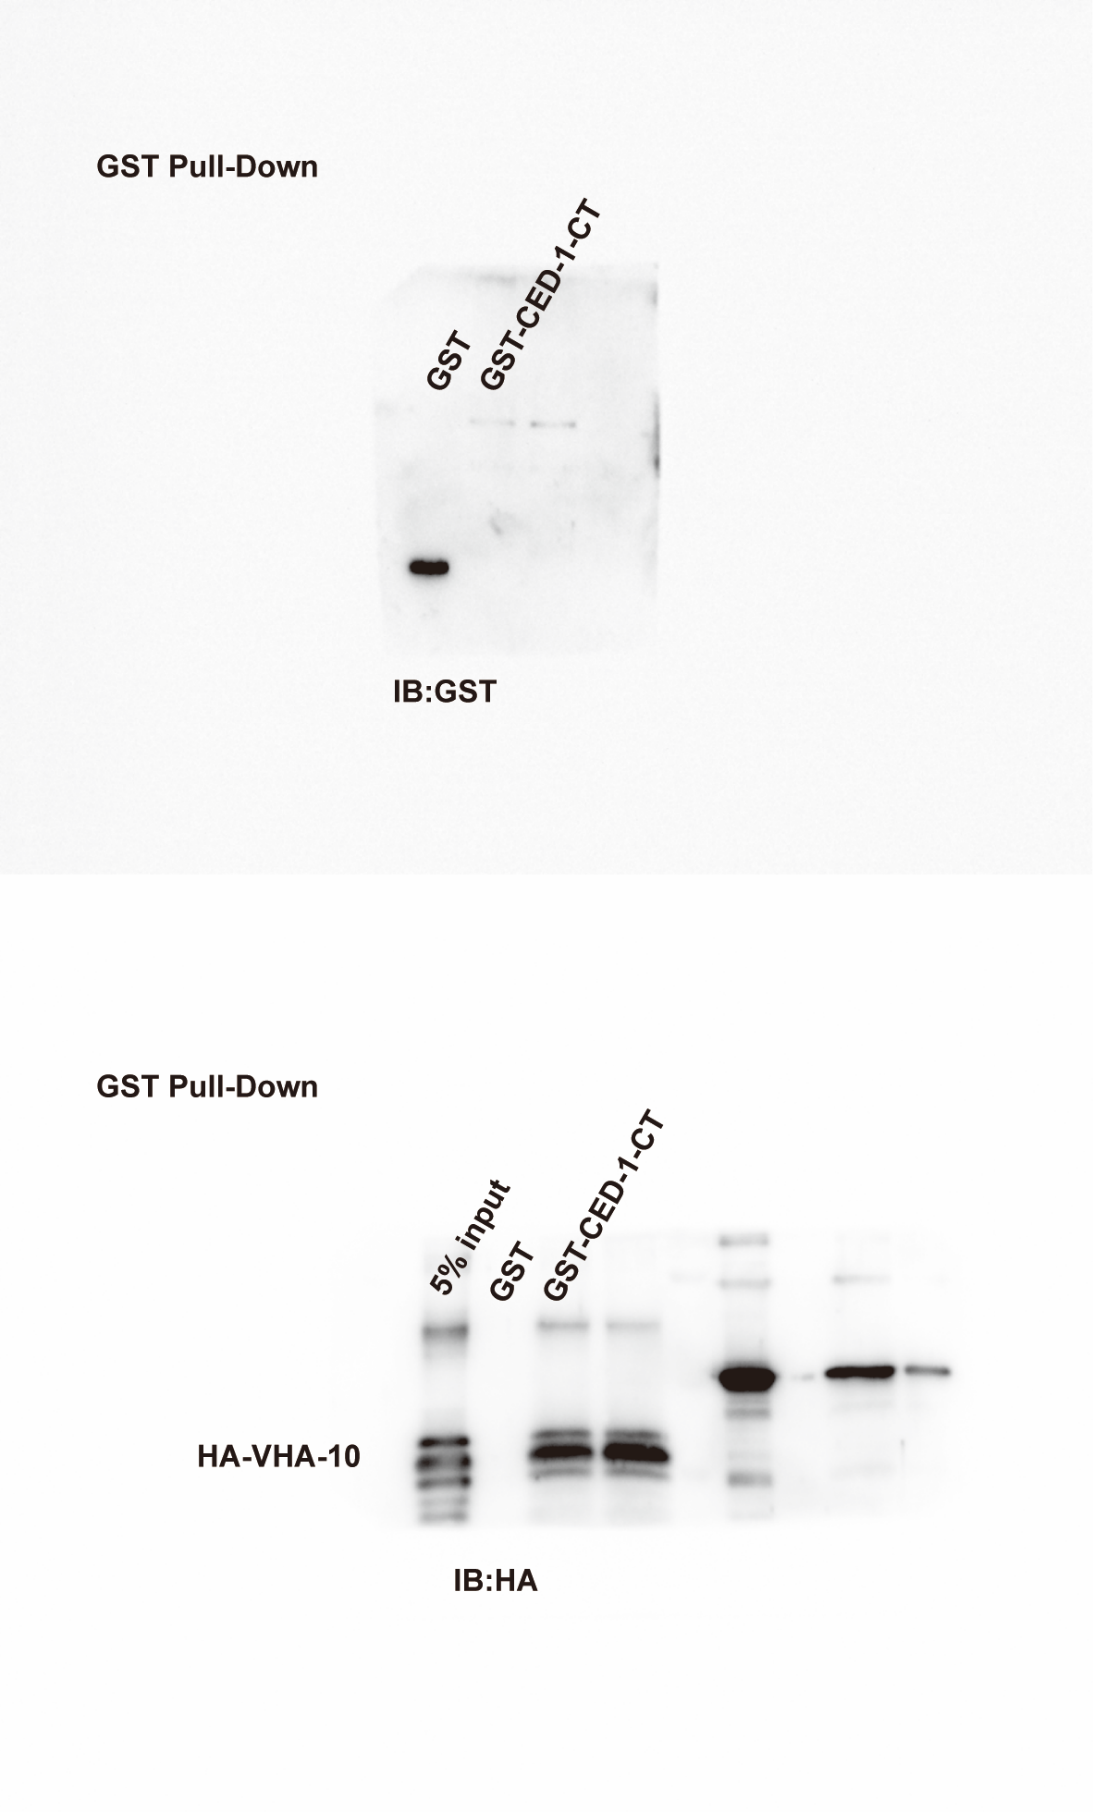


Figure 7D


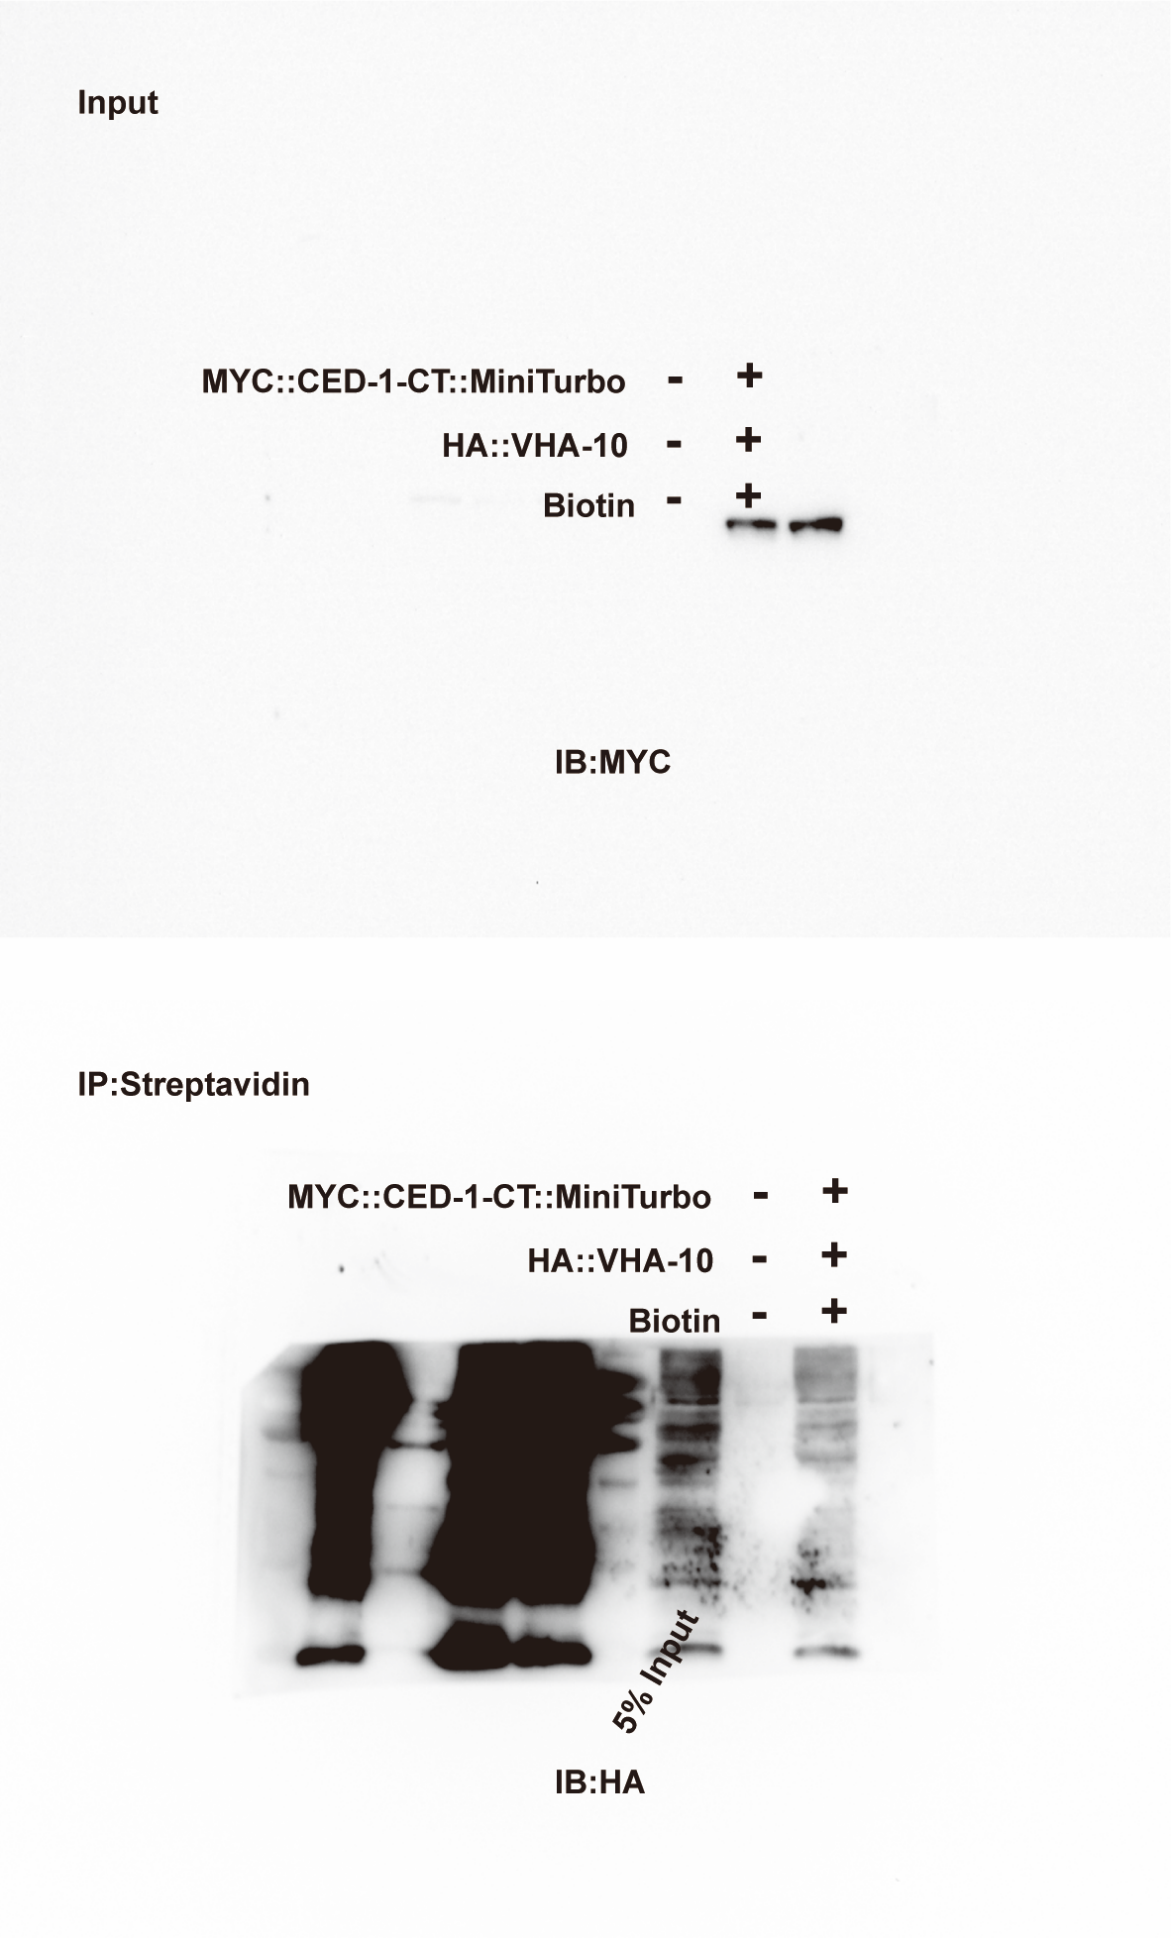

Supplement: fig7-data1 [file Figure 7 uncroppped blot with relevant bands.docx]

Figure 7-figure supplement 2E


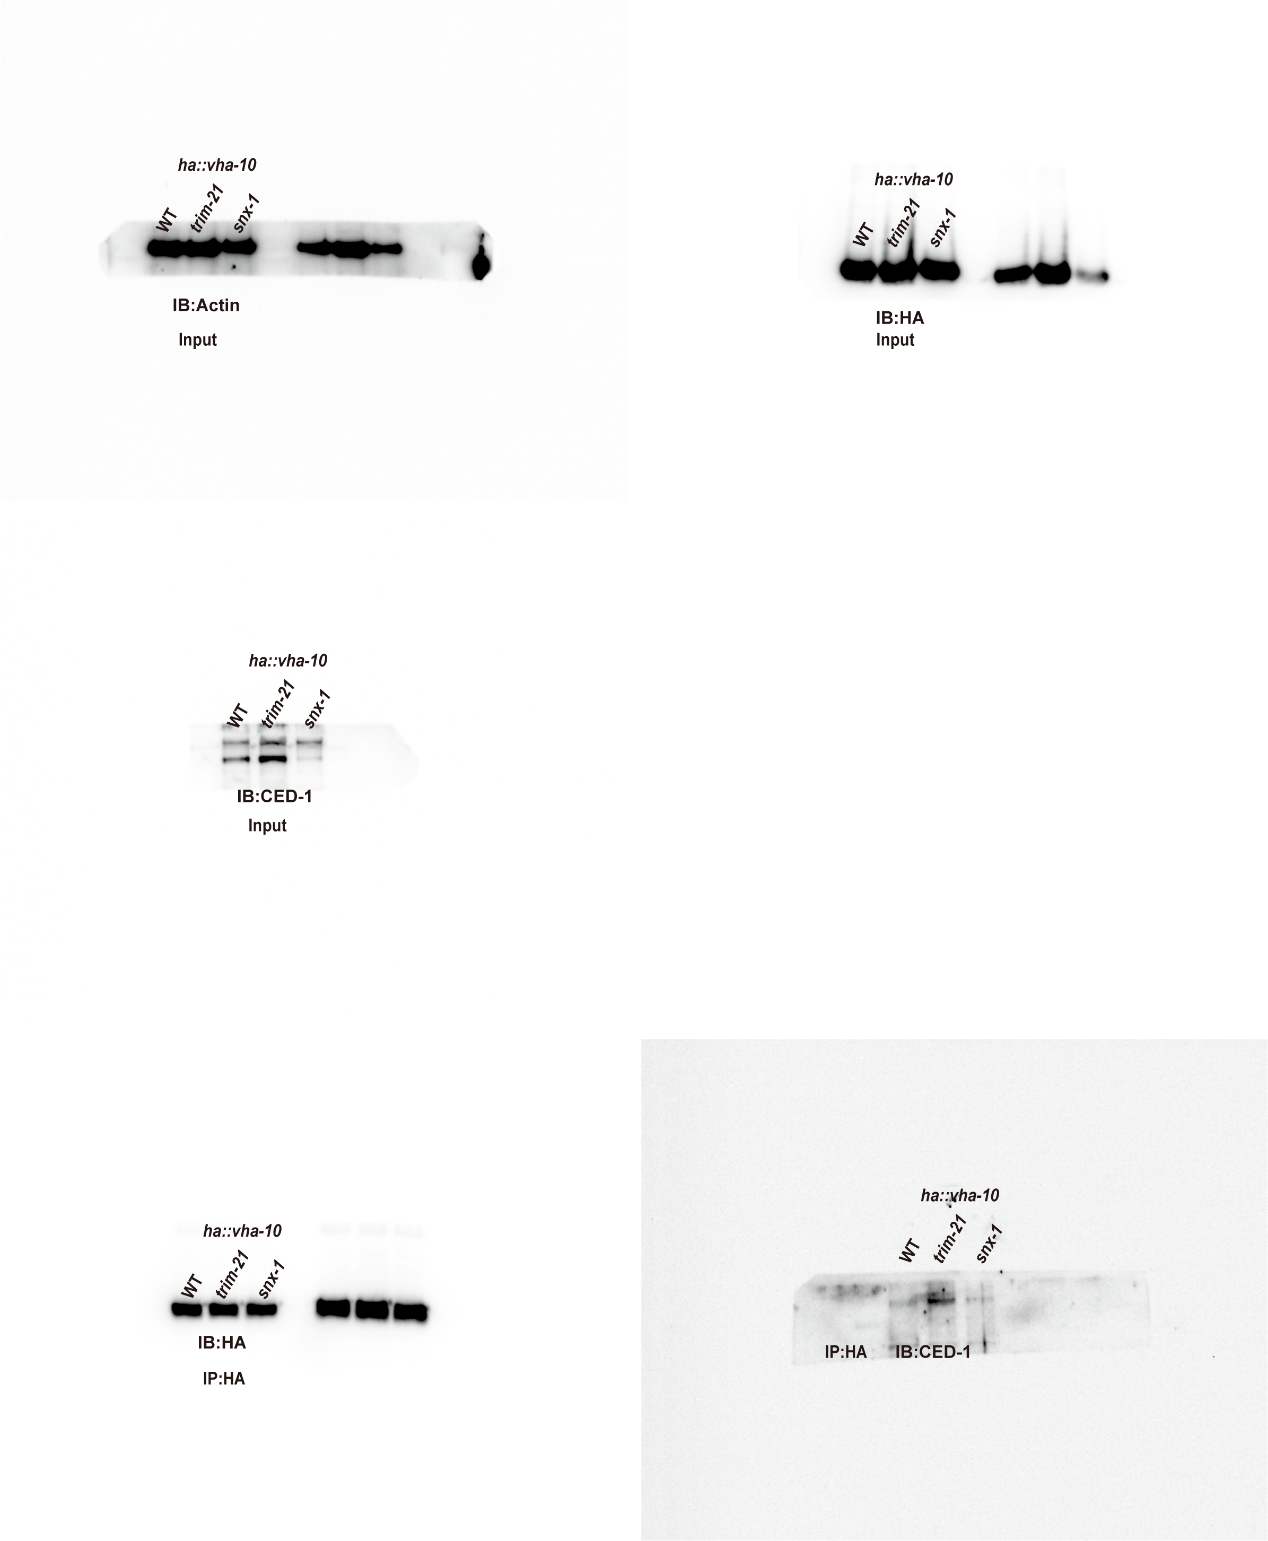

Supplement: fig7-figsupp2-data1 [file Figure 7-figure supplement 2 uncroppped blot with relevant bands.docx]
